# Supplementary material for: Integrated transcriptomic analysis identifies coordinated responses to nitrogen and phosphate deficiency in rice
Source: Front Plant Sci. 2023 May 8;14:1164441. doi: 10.3389/fpls.2023.1164441 (PMC10200874; doi:10.3389/fpls.2023.1164441)
Supplement: Supplementary file 2 [file Table_1.xlsx]

## Sheet: Sheet1
Dataset S1.The expression values for N-regulated DEGs
gene_id	-N_FPKM_1	-N_FPKM_2	-N_FPKM_3	CK_FPKM_1	CK_FPKM_2	CK_FPKM_3	-N_FPKM	CK_FPKM	-NvsCK_log2FoldChange	pvalue	padj	gene_name	gene_chr	gene_start	gene_end	gene_strand	gene_length	gene_biotype	gene_description	tf_family
Os01g0547600	8901.42	7103.83	8091.33	17.265	17.4586	30.6882	8032.19	21.804	8.50726	3.3527e-274	9.71848e-270	NRT2.4	1	20385993	20388511	-	1768	protein_coding	PF07690:Major Facilitator Superfamily	MFS_1
Os10g0210500	140.764	159.625	137.937	2948.87	2636.25	2943.28	146.109	2842.8	-4.28298	1.56979e-207	2.27518e-203	-	10	7810692	7817132	-	2882	protein_coding	PF00892:EamA-like transporter family	DUF6
Os12g0503000	163.591	268.414	183.916	9561.38	8924.28	9887.18	205.307	9457.61	-5.52704	6.3345e-185	6.12061e-181	-	12	19180665	19185915	-	3774	protein_coding	PF07168:Ureide permease	-
Os12g0438600	913.064	987.237	1015.45	8366.64	8271.52	9411.98	971.917	8683.38	-3.15952	2.13102e-162	1.5443e-158	-	12	14487420	14491026	-	2681	protein_coding	PF00654:Voltage gated chloride channel	Voltage_CLC
Os01g0825800	109.377	128.107	104.676	1586.08	1507.26	1467.45	114.053	1520.27	-3.73755	2.79013e-143	1.61755e-139	-	1	35320840	35327164	-	2043	protein_coding	PF01490:Transmembrane amino acid transporter protein	Aa_trans
Os02g0120100	250.141	181.993	248.482	3717.74	4592.59	4023.88	226.872	4111.4	-4.17882	5.95854e-133	2.87867e-129	-	2	1050786	1056830	-	2250	protein_coding	PF07714:Protein tyrosine kinase	Pkinase_Tyr
Os02g0112100	1423.81	1042.14	1255.13	14.963	11.6391	11.1594	1240.36	12.5872	6.63669	6.36946e-112	2.63759e-108	-	2	655324	657243	+	1920	protein_coding	PF07690:Major Facilitator Superfamily	MFS_1
Os02g0136000	82.7464	58.9698	56.7401	1079.64	1176.52	1247.99	66.1521	1168.05	-4.14005	1.17707e-108	4.26496e-105	-	2	1913422	1916137	-	2286	protein_coding	PF02042:RWP-RK domain|PF00564:PB1 domain	RWP-RK
Os12g0113500	125.546	152.508	169.242	1474.44	1440.34	1556.73	149.099	1490.5	-3.32239	3.41044e-104	1.09843e-100	-	12	679079	682143	-	2030	protein_coding	PF03822:NAF domain|PF00069:Protein kinase domain	Pkinase
Os01g0704100	12096.2	8392.02	15197.5	342.999	450.045	368.259	11895.2	387.101	4.94095	7.83876e-104	2.27222e-100	NRT2.3	1	29188850	29190936	+	2087	protein_coding	PF07690:Major Facilitator Superfamily	MFS_1
Os05g0561400	35.191	47.7859	51.8487	2688.74	2051.39	1437.7	44.9419	2059.28	-5.51897	1.49657e-91	3.94375e-88	-	5	27935448	27935675	+	228	protein_coding	-	-
Os02g0595900	30490.6	21945.9	32508.1	2245.61	1977.68	2572.23	28314.9	2265.17	3.64382	3.05531e-85	7.38036e-82	NAR2.1	2	23121133	23123149	-	954	protein_coding	PF16974:High-affinity nitrate transporter accessory	-
Os03g0408600	564.958	598.849	671.098	36.8321	37.8271	46.4973	611.635	40.3855	3.91455	1.85964e-82	4.14657e-79	-	3	16804298	16805869	-	1572	protein_coding	PF03514:GRAS domain family	GRAS
Os10g0554200	510.745	508.361	508.704	5540.93	3907.83	5668.02	509.27	5038.93	-3.30655	4.37664e-81	9.06184e-78	-	10	21757771	21762202	-	2393	protein_coding	PF00854:POT family	-
Os11g0113700	131.253	189.11	148.698	1529.68	1652.75	1964.05	156.354	1715.49	-3.45745	1.18259e-77	2.28531e-74	-	11	630585	633622	-	2045	protein_coding	PF00069:Protein kinase domain|PF03822:NAF domain	Pkinase
Os08g0150700	1321.09	1207.87	1785.36	64.4562	56.2556	91.1347	1438.1	70.6155	4.34414	4.30562e-75	7.80044e-72	-	8	2918636	2921281	+	1133	protein_coding	PF14299:Phloem protein 2	-
Os02g0112600	1455.2	1045.19	1454.7	118.553	102.812	123.683	1318.36	115.016	3.51932	2.97951e-73	5.08041e-70	-	2	667264	669053	-	1790	protein_coding	PF07690:Major Facilitator Superfamily	MFS_1
Os04g0404400	532.621	477.859	473.486	18.4161	12.609	26.9684	494.655	19.3312	4.66917	2.72893e-71	4.39465e-68	-	4	20065198	20066517	-	1137	protein_coding	PF13668:Ferritin-like domain	-
Os12g0428000	248.239	160.642	270.983	2670.33	2805.02	2429.02	226.621	2634.79	-3.53835	5.35332e-70	8.1672e-67	-	12	13657101	13658736	+	1413	protein_coding	PF00581:Rhodanese-like domain	Rhodanese
novel.1448	1271.63	764.575	1056.54	9.20803	11.6391	26.9684	1030.92	15.9385	5.98919	6.75476e-69	9.79001e-66	-	4	16006919	16013230	-	2312	-	PF01397:Terpene synthase, N-terminal domain|PF03936:Terpene synthase family, metal binding domain	-
Os02g0306401	133.155	115.906	83.1535	1666.65	1213.38	1460.94	110.738	1446.99	-3.70706	8.18831e-69	1.13026e-65	-	2	11997254	12002625	-	1485	protein_coding	PF00155:Aminotransferase class I and II	Aminotran_1_2
Os11g0592100	1171.77	1243.45	1220.89	4059.59	3879.7	4107.57	1212.04	4015.62	-1.72828	2.67096e-68	3.51924e-65	-	11	22505993	22507412	+	730	protein_coding	PF00967:Barwin family	-
Os07g0475900	135.057	79.3043	81.197	1322.5	1245.38	1283.33	98.5195	1283.74	-3.70141	4.33681e-68	5.46571e-65	-	7	17198555	17208207	-	1974	protein_coding	PF01842:ACT domain|PF07714:Protein tyrosine kinase	ACT
Os05g0409500	931.135	650.702	641.75	32.2281	41.7068	45.5673	741.195	39.8341	4.20952	4.48135e-66	5.41253e-63	-	5	19997585	19999679	-	1680	protein_coding	PF00892:EamA-like transporter family	DUF6
Os04g0680400	3980.39	3671.38	4301.48	378.68	582.925	477.062	3984.42	479.556	3.05303	6.99315e-66	8.10842e-63	-	4	34738022	34742715	+	1900	protein_coding	PF01979:Amidohydrolase family	Amidohydro_1
Os02g0129800	131.253	112.856	126.198	1197.04	874.872	1046.19	123.436	1039.37	-3.07252	2.5315e-65	2.82233e-62	-	2	1558563	1559143	-	581	protein_coding	-	-
Os07g0539900	474.603	381.271	332.614	2971.89	2822.48	2562.93	396.163	2785.77	-2.81337	2.65083e-65	2.84591e-62	-	7	21280322	21282626	-	2062	protein_coding	PF07983:X8 domain|PF00332:Glycosyl hydrolases family 17	Glyco_hydro_17
Os03g0283200	790.371	740.173	874.58	94.3823	107.662	123.683	801.708	108.576	2.87936	1.48891e-64	1.5414e-61	-	3	9717253	9719884	-	1045	protein_coding	PF13417:Glutathione S-transferase, N-terminal domain|PF13410:Glutathione S-transferase, C-terminal domain	-
Os03g0273200	2825.74	4219.39	5309.11	140.422	96.0225	190.639	4118.08	142.361	4.85345	3.19934e-64	3.19791e-61	-	3	9167619	9170326	-	2205	protein_coding	PF00394:Multicopper oxidase|PF07731:Multicopper oxidase|PF07732:Multicopper oxidase	-
Os02g0137700	73.2353	102.689	138.915	2604.72	3418.98	5937.7	104.947	3987.14	-5.2482	5.06375e-60	4.89276e-57	-	2	2001887	2005864	+	2311	protein_coding	PF08547:Complex I intermediate-associated protein 30 (CIA30)|PF13460:NAD(P)H-binding	-
Os09g0396900	1171.77	993.337	1214.04	207.181	193.985	219.467	1126.38	206.878	2.44473	3.25907e-59	3.04744e-56	VIT1.2	9	13831868	13833654	+	1230	protein_coding	PF01988:VIT family	DUF125
Os05g0454500	278.675	219.612	245.548	2712.91	2431.6	1759.46	247.945	2301.32	-3.21355	1.41535e-58	1.28209e-55	-	5	22303574	22306360	-	923	protein_coding	-	-
Os05g0399300	4122.1	3188.44	4212.46	18234.2	18383	19246.2	3841	18621.1	-2.27732	2.39235e-57	2.10143e-54	-	5	19426767	19427874	+	979	protein_coding	PF00182:Chitinase class I	-
Os01g0952800	23.7777	10.1672	11.7393	417.814	353.053	387.787	15.2281	386.218	-4.65451	5.50923e-57	4.69694e-54	IRO2	1	41971444	41978093	-	2378	protein_coding	PF14009:Domain of unknown function (DUF4228)	-
Os05g0111300	4668.04	3971.31	4036.37	966.843	757.511	794.174	4225.24	839.509	2.3325	1.38713e-56	1.14882e-53	-	5	605868	606764	+	674	protein_coding	-	-
Os04g0480200	643.9	509.377	814.905	27.6241	35.8872	46.4973	656.061	36.6695	4.15033	7.36386e-55	5.92934e-52	-	4	24018298	24019456	-	794	protein_coding	PF16974:High-affinity nitrate transporter accessory	-
Os05g0105800	19.9733	23.3846	15.6524	318.828	281.278	307.812	19.6701	302.639	-3.94525	2.24909e-53	1.76201e-50	-	5	313165	313673	+	365	protein_coding	-	-
Os11g0267300	466.043	466.675	486.204	1750.68	1814.73	2126.79	472.974	1897.4	-2.00458	2.17986e-51	1.66283e-48	-	11	9187679	9192837	+	2762	protein_coding	-	-
Os03g0226200	90.3553	81.3377	53.8052	915.048	1103.77	733.727	75.1661	917.516	-3.60914	4.5966e-51	3.41645e-48	-	3	6624980	6626080	-	778	protein_coding	PF00042:Globin	-
Os03g0233900	341.448	525.645	263.156	4189.65	4256.03	4222.88	376.75	4222.85	-3.48711	1.32846e-50	9.62705e-48	-	3	7092864	7093988	+	799	protein_coding	PF00042:Globin	-
Os03g0307200	7.60887	3.05016	2.93483	1422.64	629.481	646.312	4.53129	899.478	-7.62128	1.20761e-49	8.53779e-47	-	3	10926469	10927729	+	1261	protein_coding	PF03059:Nicotianamine synthase protein	-
Os07g0129300	133.155	473.792	300.331	10516.7	9883.53	10327	302.426	10242.4	-5.0825	2.84642e-49	1.9645e-46	-	7	1523654	1524512	+	851	protein_coding	PF00188:Cysteine-rich secretory protein family	SCP
Os04g0432300	1373.4	1413.24	1767.75	233.654	302.616	274.334	1518.13	270.201	2.48824	4.37537e-48	2.94951e-45	-	4	21447893	21449455	+	1374	protein_coding	PF00852:Glycosyltransferase family 10 (fucosyltransferase) C-term	-
Os06g0154400	195.928	177.926	196.634	711.32	773.03	773.715	190.163	752.688	-1.98488	1.08903e-46	7.17445e-44	-	6	2803042	2806247	+	2538	protein_coding	PF05057:Putative serine esterase (DUF676)	-
Os08g0389700	2645.03	3381.62	4128.33	569.747	460.714	464.043	3384.99	498.168	2.76539	1.32003e-45	8.50307e-43	-	8	18452698	18458055	+	2015	protein_coding	-	-
Os06g0534200	59.9198	56.9364	34.2397	421.267	486.902	518.91	50.3653	475.693	-3.24029	1.10596e-44	6.96922e-42	-	6	19972817	19973562	-	746	protein_coding	-	-
Os04g0269600	7438.62	6659.53	7225.55	1063.53	914.639	1462.8	7107.9	1146.99	2.63119	1.27887e-44	7.88735e-42	-	4	11236469	11243987	+	4120	protein_coding	PF01179:Copper amine oxidase, enzyme domain	-
Os04g0512300	343.35	440.24	434.355	59.8522	46.5564	52.077	405.982	52.8285	2.94694	1.69229e-43	1.02197e-40	-	4	25608241	25611089	-	1528	protein_coding	PF04045:Arp2/3 complex, 34 kD subunit p34-Arc	-
Os06g0729300	2511.88	2183.92	2394.82	728.585	725.504	800.683	2363.54	751.591	1.65255	1.16884e-42	6.91451e-40	-	6	31069076	31077365	+	4054	protein_coding	-	-
Os01g0256500	31677.6	25922.3	32849.6	104982	107248	120565	30149.8	110932	-1.87945	4.09706e-42	2.37523e-39	-	1	8546065	8546869	-	805	protein_coding	PF03242:Late embryogenesis abundant protein	-
Os07g0556200	194.977	187.077	142.828	963.39	993.203	1292.62	174.961	1083.07	-2.63048	5.27111e-42	2.99595e-39	petC	7	22184407	22186890	+	1081	protein_coding	PF00355:Rieske [2Fe-2S] domain|PF08802:Cytochrome B6-F complex Fe-S subunit	-
Os02g0735200	28528.5	34698.7	32775.2	10386.7	10950.4	10334.5	32000.8	10557.2	1.59986	1.9068e-41	1.06293e-38	-	2	30674780	30678659	-	1740	protein_coding	PF00120:Glutamine synthetase, catalytic domain|PF03951:Glutamine synthetase, beta-Grasp domain	-
Os01g0124100	635.34	595.799	790.448	2819.96	3656.62	3172.05	673.862	3216.21	-2.2549	2.10598e-41	1.15181e-38	-	1	1345118	1346047	-	930	protein_coding	PF00228:Bowman-Birk serine protease inhibitor family	-
Os05g0519300	49.4576	63.0367	48.9138	504.139	498.541	803.473	53.8027	602.051	-3.48637	2.58104e-41	1.38549e-38	-	5	25776481	25778593	-	1295	protein_coding	PF04720:PDDEXK-like family of unknown function	-
Os10g0171500	578.274	625.284	557.618	2077.56	1769.14	2065.41	587.058	1970.7	-1.74716	4.19041e-41	2.2085e-38	-	10	4929261	4931157	-	1601	protein_coding	PF00067:Cytochrome P450	p450
Os01g0159000	77.9909	61.0033	66.5228	425.871	468.474	371.048	68.5057	421.798	-2.62028	3.5385e-40	1.83162e-37	-	1	3091435	3092698	-	1264	protein_coding	PF14144:Seed dormancy control	-
Os01g0915350	249.19	231.812	227.939	836.779	887.481	1033.17	236.314	919.143	-1.96009	2.63173e-39	1.33835e-36	-	1	39881691	39890325	+	2681	protein_coding	-	-
novel.2075	603.003	1386.81	1312.85	62.1542	69.8346	46.4973	1100.89	59.4953	4.21125	4.72167e-39	2.35978e-36	-	7	28712480	28714713	-	1042	-	-	-
Os02g0575700	10350.9	9265.38	11396.9	1617.16	1460.71	2292.32	10337.7	1790.06	2.52956	5.08417e-39	2.49788e-36	-	2	22096140	22100732	+	2634	protein_coding	-	-
Os01g0871500	949.206	907.932	1291.33	5717.03	4630.42	5823.32	1049.49	5390.26	-2.36059	6.31821e-39	3.03963e-36	-	1	37790484	37792882	+	1791	protein_coding	PF00854:POT family	-
Os03g0379300	164.542	117.94	146.742	751.605	715.804	637.013	143.074	701.474	-2.29159	6.39658e-39	3.03963e-36	-	3	15000100	15002140	+	1136	protein_coding	-	-
Os10g0567400	486.967	400.588	430.442	1830.1	1722.59	2305.34	439.333	1952.67	-2.15197	1.49758e-38	7.00168e-36	-	10	22482882	22486431	-	2672	protein_coding	PF08417:Pheophorbide a oxygenase|PF00355:Rieske [2Fe-2S] domain	-
Os12g0555100	4132.57	2814.29	3350.6	116.251	186.226	318.041	3432.48	206.839	4.04949	2.23962e-38	1.03047e-35	-	12	22585181	22586562	+	848	protein_coding	PF10604:Polyketide cyclase / dehydrase and lipid transport	-
Os06g0701700	335.741	423.973	390.332	2205.32	1567.4	2161.19	383.349	1977.97	-2.36748	2.90868e-38	1.3174e-35	-	6	29538938	29541203	-	1861	protein_coding	PF02386:Cation transport protein	-
Os12g0476200	643.9	976.053	627.076	73.6642	81.4737	45.5673	749.009	66.9017	3.48842	3.14051e-38	1.40052e-35	-	12	17302127	17305326	-	1653	protein_coding	PF03083:Sugar efflux transporter for intercellular exchange	-
Os01g0647200	17.1199	23.3846	23.4786	273.939	225.992	211.098	21.3277	237.01	-3.47488	1.40019e-37	6.14959e-35	-	1	26086062	26088337	-	2276	protein_coding	-	-
Os03g0826800	120.791	118.956	178.046	834.477	880.691	729.078	139.265	814.749	-2.54812	1.69737e-37	7.34353e-35	-	3	34733490	34734706	-	972	protein_coding	-	-
Os01g0507000	443.216	342.635	305.222	1758.73	1689.61	2135.16	363.691	1861.17	-2.35517	1.97327e-37	8.41166e-35	-	1	17681486	17683119	+	1634	protein_coding	-	-
Os03g0647600	1661.59	1472.21	1610.24	494.931	500.481	562.617	1581.35	519.343	1.60561	4.25948e-37	1.78941e-34	-	3	25069214	25074703	-	2034	protein_coding	PF02045:CCAAT-binding transcription factor (CBF-B/NF-YA) subunit B	CBFB_NFYA
Os01g0946700	1649.22	2130.03	1998.62	7579.36	10462.6	8236.53	1925.96	8759.49	-2.18542	8.56547e-37	3.54696e-34	-	1	41603305	41604652	+	1170	protein_coding	PF00332:Glycosyl hydrolases family 17	Glyco_hydro_17
Os04g0607600	22.8266	14.2341	23.4786	453.495	335.594	248.296	20.1798	345.795	-4.09356	8.89725e-37	3.63246e-34	-	4	30734729	30739334	-	1723	protein_coding	PF02386:Cation transport protein	-
Os03g0823400	122.693	110.823	190.764	928.86	899.12	1062	141.427	963.326	-2.76772	1.36443e-36	5.49317e-34	-	3	34567109	34568087	-	874	protein_coding	PF00228:Bowman-Birk serine protease inhibitor family	-
Os12g0186600	209.244	130.14	158.481	970.296	973.804	839.741	165.955	927.947	-2.48154	1.9274e-36	7.65335e-34	-	12	4337662	4349059	+	1950	protein_coding	-	-
Os06g0128700	2514.73	2022.26	3025.81	477.666	473.323	570.057	2520.93	507.015	2.31334	3.30465e-36	1.29449e-33	-	6	1523290	1526001	+	1432	protein_coding	PF12796:Ankyrin repeats (3 copies)	-
Os10g0537800	1471.36	1552.53	1396.98	3541.64	3844.78	3782.09	1473.63	3722.84	-1.33726	6.31538e-36	2.44085e-33	-	10	20956884	20958287	+	1404	protein_coding	PF14541:Xylanase inhibitor C-terminal|PF14543:Xylanase inhibitor N-terminal	-
Os03g0764600	556.398	585.632	610.445	2358.41	2934.02	3779.3	584.158	3023.91	-2.37234	9.61094e-36	3.66569e-33	-	3	31643909	31645862	+	1496	protein_coding	PF00249:Myb-like DNA-binding domain	Myb_DNA-binding
Os04g0649500	547.838	565.297	802.187	3273.45	2724.52	3009.3	638.441	3002.43	-2.23338	2.32517e-34	8.75322e-32	-	4	33101621	33102439	-	819	protein_coding	-	-
Os07g0684000	330.035	330.434	454.899	52.9461	41.7068	30.6882	371.789	41.7804	3.165	2.43485e-34	9.0486e-32	-	7	29008876	29009943	+	986	protein_coding	-	-
Os04g0640900	1472.32	1818.91	1549.59	5848.25	5059.13	6533.8	1613.61	5813.72	-1.84932	3.65175e-34	1.33991e-31	-	4	32606375	32608648	+	2274	protein_coding	-	-
Os04g0370900	79.8931	68.1203	85.1101	354.509	357.902	419.406	77.7078	377.272	-2.27932	1.18617e-33	4.29793e-31	-	4	18042184	18049429	-	2558	protein_coding	PF13947:Wall-associated receptor kinase galacturonan-binding|PF00069:Protein kinase domain	Pkinase
Os06g0185300	1315.38	1851.45	2428.08	281.996	258.97	292.003	1864.97	277.656	2.74776	1.57254e-33	5.62756e-31	-	6	4286708	4287890	+	1183	protein_coding	PF02458:Transferase family	-
Os07g0258400	15.2177	22.3679	11.7393	512.196	327.834	238.996	16.4416	359.676	-4.45318	1.83637e-33	6.49157e-31	-	7	8966025	8970880	+	2106	protein_coding	PF01566:Natural resistance-associated macrophage protein	-
Os10g0459300	2054.39	2481.82	2720.59	736.642	726.473	714.198	2418.93	725.771	1.73686	4.03373e-33	1.40874e-30	-	10	16861849	16863370	-	1522	protein_coding	PF03016:Exostosin family	-
Os01g0962100	27.5821	19.3177	9.78277	277.392	349.173	523.56	18.8942	383.375	-4.34138	7.25291e-33	2.50286e-30	-	1	42411799	42413498	+	1417	protein_coding	-	-
Os04g0688300	129.351	141.324	154.568	735.491	813.767	563.547	141.748	704.268	-2.31261	1.16633e-32	3.97746e-30	-	4	35207157	35208610	-	1299	protein_coding	PF00141:Peroxidase	-
Os07g0491900	34.2399	51.8528	33.2614	310.771	403.489	541.228	39.7847	418.496	-3.39899	1.29316e-32	4.35869e-30	-	7	18331928	18333468	-	1044	protein_coding	PF01494:FAD binding domain	FAD_binding_3
Os11g0116300	2035.37	2211.37	2735.26	496.082	521.819	646.312	2327.33	554.738	2.0678	1.39658e-32	4.65319e-30	-	11	729514	732755	-	890	protein_coding	PF02431:Chalcone-flavanone isomerase	-
Os10g0530400	105.573	92.5217	85.1101	490.327	461.684	664.911	94.4016	538.974	-2.51359	1.88355e-32	6.20438e-30	-	10	20619376	20620523	-	1030	protein_coding	PF02798:Glutathione S-transferase, N-terminal domain|PF00043:Glutathione S-transferase, C-terminal domain	GST_N
Os07g0119300	538.327	543.946	557.618	1353.58	1316.19	1430.26	546.63	1366.67	-1.3222	3.09269e-32	1.00728e-29	-	7	1046046	1047972	+	1469	protein_coding	PF00249:Myb-like DNA-binding domain	Myb_DNA-binding
Os11g0256900	77.0398	26.4348	50.8704	641.109	550.917	613.764	51.4483	601.93	-3.54417	3.22214e-32	1.03547e-29	-	11	8466832	8469347	+	1367	protein_coding	PF03492:SAM dependent carboxyl methyltransferase	-
Os01g0740650	584.932	643.585	686.75	113.949	117.361	165.53	638.422	132.28	2.26656	3.25068e-32	1.03547e-29	-	1	30933009	30936727	-	1359	protein_coding	PF04389:Peptidase family M28	-
Os01g0823600	15.2177	14.2341	7.82622	234.805	467.504	776.505	12.426	492.938	-5.31088	6.35365e-32	2.00188e-29	-	1	35175501	35176458	+	711	protein_coding	-	-
Os05g0247100	7867.57	10696.9	14516.7	72110.4	59795.8	64789.3	11027	65565.2	-2.57189	1.22333e-31	3.81298e-29	-	5	8902501	8903789	-	1289	protein_coding	PF00704:Glycosyl hydrolases family 18	-
Os06g0693600	165.493	131.157	142.828	719.377	655.669	542.158	146.493	639.068	-2.1232	2.92882e-31	9.03167e-29	-	6	28958626	28960418	+	1436	protein_coding	-	-
Os07g0204400	1355.33	1358.34	1418.5	498.384	411.248	377.558	1377.39	429.063	1.68504	5.03277e-31	1.53563e-28	-	7	5612134	5612909	+	595	protein_coding	-	-
Os10g0330400	186.417	160.642	180.003	733.189	803.098	1111.29	175.687	882.524	-2.32902	9.32216e-31	2.81481e-28	-	10	9337927	9339154	+	1126	protein_coding	PF02622:Uncharacterized ACR, COG1678	-
Os03g0425300	400.417	341.618	498.921	78.2682	69.8346	77.1855	413.652	75.0961	2.46289	1.40665e-30	4.20356e-28	-	3	17754818	17761133	+	3647	protein_coding	PF00781:Diacylglycerol kinase catalytic domain|PF00609:Diacylglycerol kinase accessory domain	-
Os02g0131800	1701.53	1782.31	1801.01	6396.12	4740.02	5534.11	1761.62	5556.75	-1.65721	1.6881e-30	4.99316e-28	-	2	1658576	1662644	-	1874	protein_coding	PF01566:Natural resistance-associated macrophage protein	-
novel.81	54.2132	26.4348	26.4135	341.848	314.256	318.041	35.6871	324.715	-3.18056	1.95349e-30	5.71979e-28	-	1	20848844	20865805	+	15645	-	PF07197:Protein of unknown function (DUF1409)|PF13456:Reverse transcriptase-like|PF00078:Reverse transcriptase (RNA-dependent DNA polymerase)|PF00665:Integrase core domain|PF10536:Plant mobile domain	RVT_1
Os01g0621900	1020.54	1111.28	1005.67	4186.2	4097.93	6358.04	1045.83	4880.72	-2.22264	6.07777e-30	1.74432e-27	-	1	24808516	24813386	+	2936	protein_coding	-	-
Os01g0940800	187.368	118.956	108.589	809.155	815.707	1073.16	138.304	899.34	-2.70019	7.28877e-30	2.07137e-27	-	1	41349731	41351118	+	1244	protein_coding	PF00332:Glycosyl hydrolases family 17	Glyco_hydro_17
Os07g0142300	566.861	844.896	692.62	111.647	105.722	151.581	701.459	122.983	2.50901	1.11803e-29	3.14644e-27	-	7	2179636	2180493	+	858	protein_coding	-	-
Os05g0438600	216.853	248.08	261.2	896.632	1022.3	774.645	242.044	897.859	-1.89142	1.27894e-29	3.56466e-27	-	5	21493974	21496836	-	2416	protein_coding	PF00316:Fructose-1-6-bisphosphatase, N-terminal domain	-
Os08g0495500	3413.53	2873.25	4213.44	752.756	514.06	768.135	3500.07	678.317	2.3677	2.3061e-29	6.36637e-27	-	8	24464442	24467893	+	1457	protein_coding	PF00651:BTB/POZ domain	BTB
Os06g0692500	59.9198	24.4013	45.979	364.868	445.195	364.539	43.4334	391.534	-3.16806	2.44406e-29	6.68359e-27	-	6	28888959	28892150	-	3192	protein_coding	PF13855:Leucine rich repeat|PF00069:Protein kinase domain	Pkinase
Os09g0388400	1135.62	895.732	1040.89	3677.46	3000.95	3917.86	1024.08	3532.09	-1.78597	3.64904e-29	9.88548e-27	-	9	13319823	13325701	+	1303	protein_coding	PF08282:haloacid dehalogenase-like hydrolase	Hydrolase_3
Os09g0381400	6233.56	6821.18	9421.79	1084.25	1601.35	969.004	7492.18	1218.2	2.62052	3.8157e-29	1.02413e-26	-	9	12897572	12899549	-	1880	protein_coding	PF08246:Cathepsin propeptide inhibitor domain (I29)	-
Os02g0776400	2032.52	1531.18	2046.56	435.079	437.436	548.668	1870.09	473.728	1.98017	4.03997e-29	1.07437e-26	-	2	32794229	32798340	-	1150	protein_coding	PF02045:CCAAT-binding transcription factor (CBF-B/NF-YA) subunit B	CBFB_NFYA
Os12g0115700	825.562	1141.78	1103.5	163.442	140.639	230.627	1023.61	178.236	2.51982	5.56951e-29	1.45999e-26	-	12	766441	768578	-	1279	protein_coding	PF02431:Chalcone-flavanone isomerase	-
Os02g0148000	38.9954	25.418	17.609	370.623	464.594	965.284	27.3408	600.167	-4.45509	5.59075e-29	1.45999e-26	-	2	2638443	2642064	+	2322	protein_coding	PF06203:CCT motif	CCT
Os03g0700450	276.773	280.615	258.265	712.471	792.428	805.333	271.884	770.077	-1.5029	5.95863e-29	1.54217e-26	-	3	28093691	28094467	-	777	protein_coding	PF00305:Lipoxygenase	Lipoxygenase
Os05g0568800	756.131	697.471	1009.58	101.288	80.5037	152.511	821.061	111.434	2.87875	6.81675e-29	1.74865e-26	-	5	28310925	28311933	+	1009	protein_coding	-	-
Os09g0544300	550.692	675.103	608.488	1789.81	1647.9	1626.48	611.428	1688.06	-1.46523	7.04463e-29	1.79125e-26	-	9	21488250	21495344	+	2262	protein_coding	PF07714:Protein tyrosine kinase	Pkinase_Tyr
Os01g0636400	1381.96	1400.03	1990.79	285.449	284.188	385.928	1590.93	318.521	2.31916	1.0553e-28	2.66e-26	-	1	25501902	25504409	-	1310	protein_coding	PF00561:alpha/beta hydrolase fold	Abhydrolase_1
Os01g0135900	2955.09	2580.44	3087.44	987.561	1032	1139.18	2874.32	1052.91	1.44837	1.20481e-28	3.01068e-26	-	1	1941012	1941851	+	840	protein_coding	-	-
Os04g0690800	306.257	397.538	285.657	1925.63	2631.41	4359.59	329.817	2972.21	-3.17227	1.30699e-28	3.23811e-26	-	4	35337067	35338179	+	1113	protein_coding	PF00504:Chlorophyll A-B binding protein	-
Os06g0348800	72.2842	72.1872	53.8052	443.136	565.466	936.455	66.0922	648.353	-3.29529	2.11867e-28	5.20458e-26	-	6	14078261	14082203	+	1881	protein_coding	PF00249:Myb-like DNA-binding domain	Myb_DNA-binding
Os06g0710700	1988.77	2590.61	3013.09	452.344	358.872	582.146	2530.82	464.454	2.44554	9.02083e-28	2.19737e-25	-	6	30051761	30053353	-	1593	protein_coding	PF02458:Transferase family	-
Os04g0650700	2517.58	2971.88	2437.87	581.257	498.541	306.882	2642.44	462.227	2.51676	1.05768e-27	2.55492e-25	-	4	33161539	33164512	+	2889	protein_coding	PF01112:Asparaginase	Asparaginase_2
Os08g0231400	2811.48	1715.21	2100.36	11985.4	12460.6	8976.77	2209.02	11140.9	-2.33426	1.14681e-27	2.74733e-25	-	8	7994404	7995717	-	995	protein_coding	PF00190:Cupin	-
Os06g0661800	172.151	171.826	215.221	715.924	972.834	1160.57	186.399	949.777	-2.34998	1.48534e-27	3.52914e-25	-	6	27275526	27278844	-	1808	protein_coding	PF03441:FAD binding domain of DNA photolyase|PF00875:DNA photolyase	-
Os01g0124200	6958.31	7806.39	7326.32	22110.8	25953.2	19072.3	7363.67	22378.8	-1.60364	1.64108e-27	3.86747e-25	-	1	1347665	1348723	-	1059	protein_coding	PF00228:Bowman-Birk serine protease inhibitor family	-
Os04g0665600	755.18	543.946	549.792	2404.45	2194.94	2920.96	616.306	2506.78	-2.02391	2.95753e-27	6.9137e-25	-	4	33972765	33975729	-	1957	protein_coding	PF00249:Myb-like DNA-binding domain|PF14379:MYB-CC type transfactor, LHEQLE motif	Myb_DNA-binding
Os01g0650100	156.933	211.478	246.526	11.51	13.5789	23.2486	204.979	16.1125	3.65088	3.21912e-27	7.465e-25	-	1	26235768	26238284	+	731	protein_coding	-	-
Os10g0578800	140.764	113.873	158.481	887.423	814.737	1591.14	137.706	1097.77	-2.99492	4.22867e-27	9.72829e-25	-	10	23075402	23079074	-	3548	protein_coding	PF04172:LrgB-like family	-
Os10g0576900	356.666	363.986	483.269	79.4192	80.5037	95.7844	401.307	85.2358	2.23252	1.06973e-26	2.44159e-24	-	10	22981680	22986191	+	1277	protein_coding	PF13460:NAD(P)H-binding	-
Os08g0441500	13035.9	13919.9	15394.2	4642	4643.03	5747.07	14116.7	5010.7	1.49418	2.51497e-26	5.68614e-24	-	8	21506475	21513656	-	1837	protein_coding	-	-
Os08g0433500	1565.52	1282.09	1841.12	438.532	406.398	472.412	1562.91	439.114	1.83151	2.53048e-26	5.68614e-24	-	8	21025942	21027916	-	1005	protein_coding	PF02365:No apical meristem (NAM) protein	NAM
Os01g0692300	85.5997	86.4213	74.349	366.019	446.165	616.554	82.1234	476.246	-2.53743	3.33255e-26	7.43081e-24	-	1	28573135	28575675	+	2326	protein_coding	-	-
Os06g0147100	151.226	81.3377	129.133	684.847	697.376	581.216	120.565	654.48	-2.4384	3.38175e-26	7.48296e-24	-	6	2457429	2458126	-	698	protein_coding	-	-
Os08g0414700	58.9687	55.9197	75.3273	263.58	314.256	285.493	63.4052	287.776	-2.18274	3.96876e-26	8.71533e-24	-	8	19830425	19836080	-	3185	protein_coding	PF00982:Glycosyltransferase family 20|PF02358:Trehalose-phosphatase	-
Os08g0502700	841.731	814.394	846.21	3570.41	4629.45	7469.32	834.111	5223.06	-2.64672	4.90316e-26	1.06863e-23	-	8	24828163	24830863	-	1554	protein_coding	PF00266:Aminotransferase class-V	Aminotran_5
Os08g0521000	810.344	565.297	673.055	2586.3	2169.72	2808.44	682.899	2521.49	-1.88418	5.32102e-26	1.15105e-23	-	8	25909390	25910662	+	1199	protein_coding	PF04654:Protein of unknown function, DUF599	-
Os07g0638400	166.444	146.408	221.091	1749.52	1107.65	921.576	177.981	1259.59	-2.82227	5.37945e-26	1.15507e-23	-	7	26551676	26552939	+	1047	protein_coding	PF00578:AhpC/TSA family|PF10417:C-terminal domain of 1-Cys peroxiredoxin	-
Os10g0517500	1660.64	2521.47	2434.93	585.861	550.917	490.081	2205.68	542.286	2.02459	5.55663e-26	1.18434e-23	-	10	20001168	20004598	-	1702	protein_coding	PF01053:Cys/Met metabolism PLP-dependent enzyme	Cys_Met_Meta_PP
Os06g0548000	389.954	431.09	368.81	1185.53	1266.72	1021.08	396.618	1157.78	-1.54556	7.64893e-26	1.61839e-23	-	6	20727293	20731768	-	1670	protein_coding	PF00155:Aminotransferase class I and II	Aminotran_1_2
Os07g0509800	2535.65	2137.15	2811.57	8459.87	7455.81	10353.1	2494.79	8756.26	-1.81138	1.15618e-25	2.42856e-23	-	7	19409979	19413299	-	2144	protein_coding	PF01507:Phosphoadenosine phosphosulfate reductase family|PF00085:Thioredoxin	-
Os01g0941200	839.829	920.133	882.406	2197.27	2851.58	2939.56	880.789	2662.8	-1.59656	1.44571e-25	3.01488e-23	-	1	41365160	41366543	+	1232	protein_coding	PF00332:Glycosyl hydrolases family 17	Glyco_hydro_17
Os06g0547400	7385.36	9329.44	7704.91	32397.3	29744.7	22947.3	8139.9	28363.1	-1.80093	1.67466e-25	3.46739e-23	-	6	20705378	20706934	-	1344	protein_coding	PF00141:Peroxidase	-
Os12g0171500	336.692	265.364	308.157	1107.27	912.699	1259.15	303.405	1093.04	-1.84859	1.96524e-25	4.04017e-23	-	12	3634846	3635935	-	1090	protein_coding	-	-
Os07g0190000	1207.91	836.762	986.103	139.271	229.872	129.262	1010.26	166.135	2.60322	2.54074e-25	5.18652e-23	-	7	4821207	4824665	+	2869	protein_coding	PF02779:Transketolase, pyrimidine binding domain|PF13292:1-deoxy-D-xylulose-5-phosphate synthase|PF02780:Transketolase, C-terminal domain	-
Os12g0570700	246.337	223.679	189.786	857.497	1039.76	724.428	219.934	873.895	-1.99011	3.06231e-25	6.2075e-23	-	12	23501423	23502359	+	600	protein_coding	PF01439:Metallothionein	-
Os07g0124900	29.4844	38.6354	12.7176	234.805	304.556	344.08	26.9458	294.48	-3.45372	3.66484e-25	7.37727e-23	-	7	1319034	1319789	+	756	protein_coding	PF00188:Cysteine-rich secretory protein family	SCP
Os02g0717600	4104.03	3018.65	4019.74	1188.99	1112.5	1262.87	3714.14	1188.12	1.64437	3.97814e-25	7.95271e-23	-	2	29786242	29789844	-	2015	protein_coding	-	-
Os09g0127300	4499.69	4858.91	6564.24	1009.43	872.932	1394.92	5307.61	1092.43	2.28021	4.05457e-25	8.05e-23	-	9	2083449	2086572	-	1611	protein_coding	PF01370:NAD dependent epimerase/dehydratase family	Epimerase
Os08g0139200	1843.25	2325.24	2645.26	683.696	692.526	577.496	2271.25	651.239	1.80261	4.08722e-25	8.05961e-23	-	8	2182870	2184768	-	833	protein_coding	PF03358:NADPH-dependent FMN reductase	FMN_red
Os06g0128600	454.63	357.886	545.879	103.59	94.0827	99.5042	452.798	99.0591	2.19387	4.26677e-25	8.35682e-23	-	6	1520761	1522188	+	1428	protein_coding	-	-
Os06g0274800	1362.94	1904.32	2302.86	389.039	378.271	458.463	1856.71	408.591	2.18347	5.72125e-25	1.11303e-22	-	6	9326113	9328206	-	1198	protein_coding	PF00141:Peroxidase	-
Os09g0532400	408.977	385.337	369.789	1241.93	1153.24	1639.49	388.034	1344.89	-1.79352	7.1785e-25	1.38722e-22	-	9	20885173	20889792	-	2423	protein_coding	PF00072:Response regulator receiver domain|PF06203:CCT motif	Response_reg
Os03g0131100	3661.77	2998.31	3540.38	1321.35	1298.73	1432.12	3400.15	1350.73	1.33175	8.87932e-25	1.70454e-22	-	3	1776356	1780897	-	3760	protein_coding	PF02042:RWP-RK domain|PF00564:PB1 domain	RWP-RK
Os02g0600200	69.4309	97.6053	67.5011	372.925	387.97	550.528	78.1791	437.141	-2.48596	1.07371e-24	2.04761e-22	-	2	23465969	23468038	-	1252	protein_coding	-	-
Os11g0183900	716.185	734.073	841.318	1892.25	1740.04	1921.27	763.859	1851.19	-1.27703	2.3252e-24	4.40527e-22	-	11	4247310	4251716	+	1839	protein_coding	PF14543:Xylanase inhibitor N-terminal|PF14541:Xylanase inhibitor C-terminal	-
Os01g0650000	319.572	326.368	443.159	37.9831	62.0752	70.6759	363.033	56.9114	2.66325	2.7461e-24	5.16891e-22	-	1	26230738	26234611	+	3567	protein_coding	-	-
Os01g0660200	681.945	530.729	701.425	1922.18	1825.4	2237.45	638.033	1995.01	-1.64452	3.38782e-24	6.33567e-22	-	1	26885484	26886719	+	1236	protein_coding	PF00704:Glycosyl hydrolases family 18	-
novel.582	753.278	810.327	944.037	220.993	155.188	239.926	835.881	205.369	2.02556	3.90611e-24	7.2581e-22	-	11	9064873	9069351	-	2230	-	PF06075:Plant protein of unknown function (DUF936)	-
Os06g0185500	4015.58	6325.02	9505.92	575.502	320.075	790.454	6615.51	562.01	3.55706	4.2161e-24	7.78421e-22	-	6	4301775	4303137	-	1363	protein_coding	PF02458:Transferase family	-
novel.729	271.066	158.609	170.22	4.60401	16.4887	14.8791	199.965	11.9906	4.03074	4.49177e-24	8.22231e-22	-	12	1842060	1843777	-	1718	-	PF00685:Sulfotransferase domain	Sulfotransfer_1
novel.241	180.711	166.742	177.068	551.331	473.323	589.586	174.84	538.08	-1.62139	4.51012e-24	8.22231e-22	-	1	23900781	23903202	-	2422	-	-	-
Os04g0423100	952.059	1190.58	1500.68	168.046	172.647	280.844	1214.44	207.179	2.54896	5.20452e-24	9.42896e-22	-	4	20924191	20926252	+	1366	protein_coding	PF01494:FAD binding domain	FAD_binding_3
novel.2086	143.617	105.739	145.763	6.90602	11.6391	4.64973	131.707	7.73161	4.09082	6.07997e-24	1.09466e-21	-	8	3107826	3113502	+	4355	-	PF00931:NB-ARC domain|PF13966:zinc-binding in reverse transcriptase	NB-ARC
Os02g0189200	700.016	1112.29	1011.54	241.711	223.083	211.098	941.282	225.297	2.06359	7.84184e-24	1.40316e-21	-	2	4942762	4944255	+	1426	protein_coding	PF00657:GDSL-like Lipase/Acylhydrolase	Lipase_GDSL
Os10g0492400	890.237	1110.26	1371.54	276.241	258.97	318.041	1124.01	284.417	1.98192	8.36475e-24	1.48754e-21	-	10	18697375	18700436	+	2555	protein_coding	PF00069:Protein kinase domain	Pkinase
Os09g0440300	1766.21	1830.1	1868.51	4088.36	3732.27	3640.74	1821.61	3820.46	-1.06834	8.91408e-24	1.57556e-21	-	9	16330104	16338511	-	2240	protein_coding	-	-
Os11g0260100	352.861	462.608	460.768	1466.38	1506.29	1198.7	425.413	1390.46	-1.70878	1.12594e-23	1.97803e-21	-	11	8677314	8678820	+	903	protein_coding	PF03492:SAM dependent carboxyl methyltransferase	-
Os03g0815200	16905.9	19800.7	19893.3	7044.14	7900.04	8312.79	18866.6	7752.32	1.28302	1.40662e-23	2.45625e-21	-	3	34167824	34173328	-	2170	protein_coding	-	-
Os07g0668300	916.868	1325.8	1186.65	140.422	131.91	254.805	1143.11	175.712	2.69888	1.43272e-23	2.48684e-21	-	7	28222585	28224898	-	1666	protein_coding	-	-
Os07g0121200	123.644	110.823	108.589	4.60401	5.81955	10.2294	114.352	6.88432	4.02593	1.56816e-23	2.70573e-21	-	7	1117768	1120936	-	3072	protein_coding	PF08263:Leucine rich repeat N-terminal domain|PF13855:Leucine rich repeat|PF00069:Protein kinase domain	LRRNT_2
Os07g0158500	1892.71	1491.53	1697.31	646.864	669.248	598.885	1693.85	638.332	1.40833	1.86046e-23	3.19107e-21	-	7	3127749	3130514	-	1298	protein_coding	PF02045:CCAAT-binding transcription factor (CBF-B/NF-YA) subunit B	CBFB_NFYA
Os04g0585700	1252.61	1315.64	1355.89	481.119	372.451	501.241	1308.05	451.604	1.53469	1.96646e-23	3.35305e-21	-	4	29588252	29590515	-	1078	protein_coding	PF04570:zinc-finger of the FCS-type, C2-C2	-
Os03g0397700	1561.72	1673.52	1924.27	589.314	548.007	683.51	1719.84	606.944	1.50213	2.11554e-23	3.58615e-21	-	3	16072834	16078822	-	2736	protein_coding	PF07714:Protein tyrosine kinase	Pkinase_Tyr
Os04g0439600	1910.78	2296.77	2229.49	751.605	720.654	887.168	2145.68	786.476	1.44736	2.1453e-23	3.61546e-21	-	4	21878937	21881780	-	2844	protein_coding	PF00069:Protein kinase domain	Pkinase
Os06g0617800	621.074	512.428	531.204	1400.77	1342.38	1523.25	554.902	1422.13	-1.35751	2.23242e-23	3.74052e-21	-	6	24789476	24793565	-	2634	protein_coding	PF13793:N-terminal domain of ribose phosphate pyrophosphokinase|PF14572:Phosphoribosyl synthetase-associated domain	-
Os06g0146800	17.1199	15.2508	11.7393	188.765	170.707	413.826	14.7034	257.766	-4.13264	3.11095e-23	5.18259e-21	-	6	2449205	2449822	-	618	protein_coding	-	-
novel.728	2708.76	1891.1	2575.8	8259.6	7010.61	8894.93	2391.89	8055.05	-1.75164	5.12266e-23	8.48518e-21	-	12	1772379	1774746	-	2251	-	-	-
Os03g0609500	1565.52	1194.65	1396	4759.4	4405.4	6658.41	1385.39	5274.4	-1.9287	5.43245e-23	8.94718e-21	-	3	22976955	22979863	-	1104	protein_coding	PF03195:Lateral organ boundaries (LOB) domain	-
Os11g0141333	433.705	342.635	514.574	41.4361	70.8045	84.6251	430.305	65.6219	2.70409	7.2815e-23	1.19248e-20	-	11	1917488	1921931	-	1056	protein_coding	PF00685:Sulfotransferase domain	Sulfotransfer_1
Os10g0390500	1592.16	1708.09	1547.63	3165.26	3321.99	3385	1615.96	3290.75	-1.02627	7.80834e-23	1.27157e-20	-	10	12968039	12974099	+	1801	protein_coding	PF00155:Aminotransferase class I and II	Aminotran_1_2
Os07g0618400	1277.34	1102.13	1328.5	459.25	516.97	441.724	1235.99	472.648	1.38681	1.52493e-22	2.46944e-20	-	7	25516454	25523182	+	3036	protein_coding	PF00069:Protein kinase domain|PF13855:Leucine rich repeat|PF08263:Leucine rich repeat N-terminal domain	Pkinase
Os05g0506000	219.706	147.425	150.655	665.28	670.218	875.079	172.595	736.859	-2.0935	1.5914e-22	2.56278e-20	-	5	24997324	24999559	+	1274	protein_coding	-	-
Os05g0334750	156.933	197.244	205.438	32.2281	37.8271	34.408	186.538	34.821	2.4179	2.17109e-22	3.47698e-20	-	5	15643309	15644732	-	1424	protein_coding	PF00069:Protein kinase domain|PF03822:NAF domain	Pkinase
Os01g0720700	123.644	118.956	103.697	461.552	369.541	544.018	115.433	458.371	-1.98961	3.1937e-22	5.08658e-20	-	1	30043446	30043783	+	338	protein_coding	-	-
Os04g0584201	21.8755	18.301	24.4569	150.781	148.398	125.543	21.5445	141.574	-2.71289	3.31241e-22	5.24682e-20	-	4	29507838	29509340	+	1503	protein_coding	PF00139:Legume lectin domain|PF00069:Protein kinase domain	Pkinase
Os03g0215700	1365.79	1057.39	1298.17	237.107	248.301	381.278	1240.45	288.895	2.10022	3.38361e-22	5.33048e-20	-	3	6079161	6084477	+	2232	protein_coding	PF07058:Microtubule-associated protein 70	-
Os07g0142200	2040.13	1875.85	2993.53	577.804	612.022	465.903	2303.17	551.91	2.06153	3.67072e-22	5.75152e-20	-	7	2176824	2177640	+	817	protein_coding	-	-
Os05g0278500	1942.16	1662.34	1936.99	636.505	667.308	792.314	1847.16	698.709	1.4017	3.79782e-22	5.91867e-20	-	5	11609491	11615022	-	1551	protein_coding	PF02458:Transferase family	-
Os01g0226600	249.19	287.732	368.81	56.3992	26.188	26.0385	301.911	36.2085	3.07701	3.92492e-22	6.08404e-20	-	1	6987901	6994006	+	3090	protein_coding	PF03595:Voltage-dependent anion channel	C4dic_mal_tran
Os03g0828300	129.351	111.839	156.524	16.114	16.4887	14.8791	132.571	15.8273	3.06842	5.33123e-22	8.22002e-20	-	3	34792025	34793842	+	1713	protein_coding	-	-
Os03g0793800	2501.41	3610.38	3624.52	948.427	952.466	1072.23	3245.44	991.04	1.7111	7.44162e-22	1.14132e-19	-	3	33023016	33023942	-	825	protein_coding	PF14368:Probable lipid transfer	-
Os04g0136700	699.065	741.19	855.014	276.241	292.917	241.786	765.09	270.315	1.50172	7.61709e-22	1.16209e-19	-	4	2426978	2429504	-	962	protein_coding	PF00571:CBS domain	CBS
Os02g0753800	2005.89	1655.22	1806.88	4128.65	4418.98	5000.32	1822.66	4515.98	-1.30903	9.00739e-22	1.367e-19	-	2	31698204	31700438	-	1222	protein_coding	PF00191:Annexin	-
Os06g0257600	444.168	602.916	771.86	120.855	81.4737	124.613	606.315	108.981	2.47702	1.05963e-21	1.59977e-19	-	6	8236902	8238699	+	1426	protein_coding	PF00657:GDSL-like Lipase/Acylhydrolase	Lipase_GDSL
Os01g0608300	19.9733	15.2508	12.7176	141.573	112.511	129.262	15.9806	127.782	-2.99502	1.16855e-21	1.75507e-19	-	1	24018634	24020111	+	1398	protein_coding	PF14543:Xylanase inhibitor N-terminal|PF14541:Xylanase inhibitor C-terminal	-
Os12g0552800	1026.25	902.849	1082.95	325.734	367.601	410.106	1004.02	367.814	1.447	1.70461e-21	2.54699e-19	-	12	22466362	22469274	+	2089	protein_coding	-	-
Os01g0946600	116.986	104.722	157.503	555.935	855.473	541.228	126.404	650.879	-2.36434	1.73927e-21	2.58545e-19	-	1	41597358	41598689	-	1139	protein_coding	PF00332:Glycosyl hydrolases family 17	Glyco_hydro_17
Os01g0908200	2063.9	1477.3	2115.03	6994.65	5817.61	8684.76	1885.41	7165.67	-1.92616	2.90308e-21	4.29345e-19	-	1	39544235	39548599	+	1446	protein_coding	PF00651:BTB/POZ domain	BTB
Os01g0246400	161.688	177.926	204.46	827.571	1700.28	2584.32	181.358	1704.06	-3.23252	3.02596e-21	4.45246e-19	-	1	8061858	8062892	+	942	protein_coding	PF00504:Chlorophyll A-B binding protein	-
Os03g0388900	369.981	416.856	588.923	77.1172	63.0451	105.084	458.587	81.7487	2.48555	3.04884e-21	4.46347e-19	-	3	15530630	15532454	-	1510	protein_coding	PF00656:Caspase domain	Peptidase_C14
Os11g0708100	1209.81	1285.14	1003.71	288.902	227.932	374.768	1166.22	297.201	1.97152	3.0765e-21	4.48134e-19	-	11	28975000	28976334	+	1335	protein_coding	PF07731:Multicopper oxidase|PF00394:Multicopper oxidase	-
Os01g0896200	2360.65	2885.46	3002.33	843.685	757.511	1050.84	2749.48	884.012	1.63658	3.19158e-21	4.62572e-19	-	1	38948587	38950479	+	1188	protein_coding	-	-
Os04g0686650	1947.87	1635.9	1744.27	658.374	693.496	794.174	1776.01	715.348	1.31116	3.88612e-21	5.60432e-19	-	4	35091588	35097920	-	1392	protein_coding	PF07714:Protein tyrosine kinase	Pkinase_Tyr
Os01g0253800	756.131	624.267	1209.15	145.026	159.068	175.76	863.183	159.951	2.43089	4.2502e-21	6.09904e-19	-	1	8401548	8402325	-	528	protein_coding	-	-
Os04g0316200	36.1421	18.301	28.37	161.14	170.707	205.518	27.6044	179.122	-2.69443	4.74063e-21	6.7693e-19	-	4	14453617	14454811	-	1138	protein_coding	PF01657:Salt stress response/antifungal	-
Os03g0859900	1385.76	1493.56	1856.77	532.914	435.496	560.757	1578.7	509.723	1.63111	4.77117e-21	6.77951e-19	-	3	36292039	36294776	+	2080	protein_coding	PF04784:Protein of unknown function, DUF547	-
Os10g0532200	374.737	680.187	615.336	119.704	94.0827	104.154	556.753	105.98	2.39502	5.16244e-21	7.22917e-19	-	10	20692577	20696225	-	1888	protein_coding	PF00561:alpha/beta hydrolase fold	Abhydrolase_1
Os06g0210000	108.426	107.772	84.1318	5.75502	4.84962	7.43957	100.11	6.01474	4.05031	7.79652e-21	1.08653e-18	-	6	5614074	5616716	+	1262	protein_coding	PF00892:EamA-like transporter family	DUF6
Os02g0508100	1370.55	1373.59	1588.72	661.827	578.075	608.185	1444.29	616.029	1.23013	9.25671e-21	1.28385e-18	-	2	18145538	18146073	-	536	protein_coding	-	-
Os05g0563000	1242.15	1661.32	1867.53	520.253	414.158	464.973	1590.33	466.461	1.77021	1.10495e-20	1.52521e-18	-	5	28003165	28004999	+	1538	protein_coding	PF02365:No apical meristem (NAM) protein	NAM
Os01g0110200	2211.33	4455.27	4666.38	562.841	607.173	762.556	3777.66	644.19	2.55148	1.21334e-20	1.66687e-18	-	1	543425	544510	-	970	protein_coding	-	-
Os02g0186900	1459	1449.84	1705.14	604.277	604.263	695.599	1537.99	634.713	1.27622	1.36812e-20	1.87064e-18	-	2	4826405	4828206	+	1709	protein_coding	PF00067:Cytochrome P450	p450
Os08g0375400	90.3553	233.846	271.961	10.359	7.7594	9.29946	198.721	9.13929	4.44746	1.49212e-20	2.03062e-18	-	8	17613571	17614371	+	801	protein_coding	PF03018:Dirigent-like protein	-
Os10g0317900	1366.74	1940.92	1754.05	430.475	497.571	584.006	1687.24	504.017	1.7418	1.52504e-20	2.06571e-18	-	10	8494248	8504235	+	2030	protein_coding	PF00067:Cytochrome P450	p450
Os02g0732800	755.18	994.354	1153.39	278.543	177.496	185.059	967.641	213.699	2.18204	1.64507e-20	2.21404e-18	-	2	30554630	30556339	-	1206	protein_coding	PF00657:GDSL-like Lipase/Acylhydrolase	Lipase_GDSL
Os09g0453300	182.613	130.14	134.024	629.599	511.15	802.543	148.926	647.764	-2.1203	1.64982e-20	2.21404e-18	-	9	16999461	17001374	-	1686	protein_coding	PF00191:Annexin	-
Os03g0306700	1614.03	870.314	1217.95	171.499	163.917	278.984	1234.1	204.8	2.58955	1.77792e-20	2.37011e-18	-	3	10905602	10907007	+	1406	protein_coding	PF00170:bZIP transcription factor	bZIP_1
Os01g0151500	1051.93	1384.77	1662.09	296.959	366.631	403.596	1366.26	355.729	1.93985	1.78247e-20	2.37011e-18	-	1	2783189	2790377	+	1797	protein_coding	PF01019:Gamma-glutamyltranspeptidase	-
Os10g0479700	2474.78	2590.61	2804.72	1159.06	1114.44	1300.06	2623.37	1191.19	1.13869	1.99673e-20	2.64288e-18	-	10	18011909	18018928	+	1656	protein_coding	PF03151:Triose-phosphate Transporter family	-
Os05g0470000	4338	4401.39	5045.95	1531.99	1737.13	2030.07	4595.11	1766.4	1.37879	2.15226e-20	2.8358e-18	-	5	23080871	23083749	-	2035	protein_coding	PF14416:PMR5 N terminal Domain|PF13839:GDSL/SGNH-like Acyl-Esterase family found in Pmr5 and Cas1p	-
Os02g0533800	251.093	151.491	313.049	1691.97	1401.54	1060.14	238.544	1384.55	-2.53621	2.19504e-20	2.87908e-18	-	2	19648496	19649478	-	761	protein_coding	-	-
Os04g0359100	4443.58	4988.04	5109.54	2217.98	2329.76	2449.48	4847.05	2332.41	1.05502	2.50687e-20	3.27327e-18	-	4	17180207	17183428	+	1157	protein_coding	PF13602:Zinc-binding dehydrogenase|PF08240:Alcohol dehydrogenase GroES-like domain	ADH_N
Os03g0432100	150.275	83.3712	59.6749	591.616	650.819	737.447	97.7737	659.961	-2.75369	2.58434e-20	3.35929e-18	-	3	18153151	18160127	-	2922	protein_coding	PF02896:PEP-utilising enzyme, TIM barrel domain|PF01326:Pyruvate phosphate dikinase, PEP/pyruvate binding domain|PF00391:PEP-utilising enzyme, mobile domain	-
Os01g0183300	944.45	993.337	933.276	382.133	395.729	455.673	957.021	411.179	1.21721	2.98507e-20	3.86287e-18	-	1	4402668	4407292	-	2292	protein_coding	PF03372:Endonuclease/Exonuclease/phosphatase family	Exo_endo_phos
Os03g0291200	155.982	471.759	442.181	27.6241	9.69925	7.43957	356.641	14.921	4.60503	5.44448e-20	7.01418e-18	-	3	10116219	10120372	+	1567	protein_coding	PF14416:PMR5 N terminal Domain|PF13839:GDSL/SGNH-like Acyl-Esterase family found in Pmr5 and Cas1p	-
Os09g0553900	149.324	165.726	89.0232	814.91	989.323	2102.61	134.691	1302.28	-3.27392	6.22176e-20	7.9801e-18	-	9	21945942	21948965	+	3024	protein_coding	PF10358:N-terminal C2 in EEIG1 and EHBP1 proteins	-
Os01g0127000	279.626	294.849	457.834	71.3622	54.3158	70.6759	344.103	65.4513	2.39602	6.79344e-20	8.67495e-18	LPR3	1	1490494	1492684	-	2019	protein_coding	PF00394:Multicopper oxidase|PF07731:Multicopper oxidase	-
Os03g0176700	146.471	140.308	169.242	459.25	518.91	685.37	152.007	554.51	-1.86815	6.90774e-20	8.78222e-18	-	3	4069860	4072360	-	696	protein_coding	-	-
Os10g0116800	119.84	93.5384	124.241	12.661	4.84962	12.0893	112.54	9.86665	3.52458	7.19574e-20	9.10842e-18	-	10	1082947	1084984	+	1195	protein_coding	PF00149:Calcineurin-like phosphoesterase	Metallophos
Os01g0392600	128.4	76.2541	68.4794	580.106	576.135	395.227	91.0444	517.156	-2.50381	8.19695e-20	1.0315e-17	-	1	16693961	16700566	+	4014	protein_coding	-	-
Os05g0556400	4683.26	6341.29	5804.12	2089.07	1849.65	2253.26	5609.56	2063.99	1.44238	8.22014e-20	1.0315e-17	-	5	27666328	27669347	+	1457	protein_coding	PF03188:Eukaryotic cytochrome b561	Cytochrom_B561
Os06g0223700	1238.34	1425.44	1201.32	591.616	533.458	517.05	1288.37	547.375	1.23586	9.10232e-20	1.13728e-17	-	6	6395390	6397221	-	853	protein_coding	PF04570:zinc-finger of the FCS-type, C2-C2	-
Os01g0975900	10480.3	6213.18	7709.8	67172.5	45284.8	31735.3	8134.42	48064.2	-2.56282	1.0103e-19	1.25689e-17	-	1	43115747	43117221	-	1394	protein_coding	PF00230:Major intrinsic protein	-
Os10g0580400	16351.5	10108.2	17990.5	2242.15	2315.21	3757.91	14816.7	2771.76	2.4182	1.10055e-19	1.36332e-17	-	10	23156882	23159586	+	2513	protein_coding	PF00474:Sodium:solute symporter family	-
Os11g0242600	815.1	1153.98	1105.45	241.711	187.195	311.532	1024.84	246.813	2.05306	1.4508e-19	1.78955e-17	-	11	7651046	7652401	-	1356	protein_coding	PF04669:Polysaccharide biosynthesis	-
Os05g0555700	1755.75	1636.92	1981.99	761.964	673.128	804.403	1791.55	746.498	1.26308	1.47791e-19	1.81526e-17	-	5	27638094	27638894	+	801	protein_coding	-	-
EPlOSAG00000012675	6.65776	8.13377	7.82622	103.59	84.3834	156.231	7.53925	114.735	-3.93153	1.5594e-19	1.90727e-17	-	2	22586615	22586685	+	71	ncRNA	-	-
Os06g0234600	342.399	713.738	645.663	90.9293	78.5639	106.944	567.267	92.1456	2.62102	1.88552e-19	2.29646e-17	-	6	7005872	7008330	-	1551	protein_coding	PF13839:GDSL/SGNH-like Acyl-Esterase family found in Pmr5 and Cas1p|PF14416:PMR5 N terminal Domain	-
Os02g0590400	996.761	1247.52	1700.25	295.808	287.098	377.558	1314.84	320.154	2.03717	1.9376e-19	2.35001e-17	-	2	22805689	22808493	-	1672	protein_coding	PF02450:Lecithin:cholesterol acyltransferase	-
Os04g0454200	551.643	583.598	651.532	161.14	146.459	220.397	595.591	175.999	1.75637	2.11195e-19	2.54524e-17	-	4	22744192	22748050	+	1842	protein_coding	PF00083:Sugar (and other) transporter	Sugar_tr
Os01g0369700	1580.74	2477.75	2256.88	684.847	622.692	631.433	2105.13	646.324	1.70378	2.11613e-19	2.54524e-17	-	1	15170441	15171859	-	909	protein_coding	PF02798:Glutathione S-transferase, N-terminal domain|PF00043:Glutathione S-transferase, C-terminal domain	GST_N
Os05g0591900	3356.46	2439.11	3308.53	8416.14	7699.26	8000.32	3034.7	8038.57	-1.40526	2.5955e-19	3.10891e-17	-	5	29486800	29492176	-	3763	protein_coding	-	-
Os04g0683700	11395.2	10175.3	12923	38206.4	29978.4	48420.4	11497.9	38868.4	-1.75723	3.19284e-19	3.80867e-17	-	4	34908578	34910477	-	1813	protein_coding	PF13193:AMP-binding enzyme C-terminal domain|PF00501:AMP-binding enzyme	AMP-binding
Os04g0115700	78.942	77.2708	69.4577	623.844	431.616	291.073	75.2235	448.844	-2.57526	3.45032e-19	4.09895e-17	-	4	937896	943051	+	4050	protein_coding	-	-
Os06g0192400	671.482	633.417	749.36	179.557	264.789	219.467	684.753	221.271	1.62702	4.30766e-19	5.05572e-17	-	6	4653460	4655652	-	1204	protein_coding	-	-
Os01g0615100	330.986	313.15	345.332	1098.06	1891.35	1130.81	329.823	1373.41	-2.0582	4.30801e-19	5.05572e-17	-	1	24392841	24393423	+	486	protein_coding	-	-
Os03g0439700	13.3155	17.2843	11.7393	115.1	96.0225	107.874	14.113	106.332	-2.91532	4.54015e-19	5.30667e-17	-	3	18575450	18577554	-	1196	protein_coding	PF06799:Protein of unknown function (DUF1230)	-
Os01g0257100	3862.45	4409.52	4805.3	1901.46	1704.16	2005.89	4359.09	1870.5	1.22057	4.91059e-19	5.7166e-17	-	1	8577244	8577934	-	691	protein_coding	PF05498:Rapid ALkalinization Factor (RALF)	-
Os06g0525200	299.599	318.234	315.005	113.949	103.782	117.173	310.946	111.635	1.47799	6.0722e-19	7.04059e-17	-	6	19445475	19446523	-	1049	protein_coding	-	-
Os07g0673900	539.278	412.789	604.575	1694.28	1478.16	1426.54	518.881	1532.99	-1.5622	6.21007e-19	7.17177e-17	-	7	28484263	28485201	+	695	protein_coding	PF04588:Hypoxia induced protein conserved region	-
Os08g0140500	56.1154	47.7859	43.0442	176.103	231.812	254.805	48.9818	220.907	-2.17477	6.3162e-19	7.26539e-17	-	8	2268901	2270472	-	1572	protein_coding	PF00282:Pyridoxal-dependent decarboxylase conserved domain	-
Os01g0920500	1173.67	1074.67	1205.24	493.78	514.06	567.267	1151.19	525.036	1.13172	6.36722e-19	7.29512e-17	-	1	40194213	40194941	+	729	protein_coding	PF03407:Nucleotide-diphospho-sugar transferase	-
Os06g0110000	126.497	120.99	117.393	394.794	313.286	390.577	121.627	366.219	-1.58932	6.49067e-19	7.40729e-17	-	6	580670	586443	+	1925	protein_coding	PF00067:Cytochrome P450	p450
Os08g0189200	3861.5	4190.93	4287.79	7825.67	9143.48	8226.3	4113.4	8398.48	-1.02989	6.75045e-19	7.67354e-17	-	8	5222230	5223304	+	917	protein_coding	PF00190:Cupin	-
Os03g0700400	167.395	175.893	172.177	408.606	485.932	438.004	171.822	444.181	-1.37144	6.90474e-19	7.81827e-17	-	3	28090924	28092246	+	380	protein_coding	PF00305:Lipoxygenase	Lipoxygenase
Os05g0179300	914.015	907.932	963.603	275.09	287.098	393.367	928.517	318.518	1.54132	6.96512e-19	7.85595e-17	-	5	4735060	4737046	-	1895	protein_coding	PF02458:Transferase family	-
Os10g0493600	5963.45	6945.22	6537.82	15665.2	13794.3	13010.9	6482.17	14156.8	-1.12691	8.58996e-19	9.65106e-17	-	10	18733290	18741383	+	1985	protein_coding	PF16499:Alpha galactosidase A|PF17450:Alpha galactosidase A C-terminal beta sandwich domain	-
Os10g0140200	4434.07	3758.82	5134	12893.5	11152.2	10755.8	4442.29	11600.5	-1.38472	9.42816e-19	1.05519e-16	-	10	2477209	2489739	+	3413	protein_coding	PF07748:Glycosyl hydrolases family 38 C-terminal domain|PF09261:Alpha mannosidase middle domain|PF01074:Glycosyl hydrolases family 38 N-terminal domain	-
Os08g0503000	1681.56	1649.12	1052.63	8615.26	6474.25	4938.01	1461.1	6675.84	-2.1918	1.05006e-18	1.1707e-16	-	8	24854285	24855659	+	827	protein_coding	-	-
Os10g0127900	147.422	181.993	111.524	1774.85	1134.81	634.223	146.979	1181.29	-3.00647	1.0695e-18	1.1878e-16	-	10	1743579	1752159	-	2125	protein_coding	PF00646:F-box domain	F-box
Os06g0654900	325.279	363.986	296.418	999.071	844.804	1245.2	328.561	1029.69	-1.64849	1.12806e-18	1.24805e-16	-	6	26843118	26843680	-	563	protein_coding	-	-
Os07g0126500	44.7021	52.8695	48.9138	215.238	219.203	167.39	48.8285	200.61	-2.03824	1.23323e-18	1.35922e-16	-	7	1401708	1402384	+	677	protein_coding	PF00188:Cysteine-rich secretory protein family	SCP
Os01g0717700	4673.75	5084.62	6159.23	2335.39	2089.22	2181.65	5305.87	2202.09	1.26887	1.35785e-18	1.49091e-16	-	1	29894029	29898449	+	1818	protein_coding	PF04864:Allinase|PF04863:Alliinase EGF-like domain	-
Os08g0369800	175.955	96.5885	114.458	9.20803	14.5489	12.0893	129.001	11.9487	3.42269	1.43565e-18	1.57038e-16	-	8	17228974	17235520	-	2105	protein_coding	PF03055:Retinal pigment epithelial membrane protein	RPE65
Os09g0346500	1419.05	1749.78	1206.22	5955.29	8396.64	15829.5	1458.35	10060.5	-2.78639	1.56868e-18	1.70945e-16	-	9	10845779	10847012	+	1234	protein_coding	PF00504:Chlorophyll A-B binding protein	-
Os03g0664400	224.462	419.906	359.028	31.0771	46.5564	64.1663	334.465	47.2666	2.81342	1.73874e-18	1.88767e-16	-	3	26096042	26096992	+	951	protein_coding	PF14368:Probable lipid transfer	-
Os05g0134400	23978.4	31800	31967.2	8592.24	8681.79	11648.5	29248.5	9640.85	1.60107	1.80351e-18	1.94343e-16	-	5	2010153	2014950	+	1600	protein_coding	PF00141:Peroxidase	-
Os02g0650300	1.90222	1.01672	0.978277	218.691	176.526	102.294	1.29907	165.837	-6.98431	1.81647e-18	1.95015e-16	-	2	26200136	26204468	-	2512	protein_coding	PF03169:OPT oligopeptide transporter protein	OPT
Os01g0823200	252.044	377.204	347.288	85.1742	57.2255	79.9753	325.512	74.125	2.13729	2.35001e-18	2.51364e-16	-	1	35148704	35153068	+	2180	protein_coding	PF03151:Triose-phosphate Transporter family	-
Os06g0185400	392.808	554.113	705.338	134.667	91.1729	120.893	550.753	115.578	2.25461	2.53135e-18	2.69766e-16	-	6	4288255	4288983	+	729	protein_coding	-	-
Os08g0447000	3333.63	3981.48	4340.61	1454.87	1364.68	1709.24	3885.24	1509.6	1.36359	2.6934e-18	2.85984e-16	-	8	21818095	21823157	-	2245	protein_coding	PF00389:D-isomer specific 2-hydroxyacid dehydrogenase, catalytic domain|PF01842:ACT domain|PF02826:D-isomer specific 2-hydroxyacid dehydrogenase, NAD binding domain	ACT
Os08g0470200	3712.18	4332.25	5228.89	1444.51	1793.39	1547.43	4424.44	1595.11	1.47159	3.18271e-18	3.36705e-16	-	8	23117162	23119489	-	1128	protein_coding	PF00194:Eukaryotic-type carbonic anhydrase	-
Os11g0184900	3125.34	2627.21	2820.37	8419.59	6321	9111.61	2857.64	7950.73	-1.4762	3.29997e-18	3.47841e-16	-	11	4299277	4301784	-	2076	protein_coding	PF02365:No apical meristem (NAM) protein	NAM
Os01g0127200	613.465	1346.14	2034.82	145.026	167.797	92.0646	1331.47	134.963	3.3032	4.09938e-18	4.30539e-16	-	1	1497241	1500606	-	2288	protein_coding	PF07731:Multicopper oxidase|PF00394:Multicopper oxidase	-
Os02g0247800	470.799	417.873	451.964	151.932	190.105	157.161	446.878	166.399	1.42371	4.11613e-18	4.30737e-16	-	2	8358824	8362959	+	2587	protein_coding	PF01699:Sodium/calcium exchanger protein	Na_Ca_ex
Os06g0102100	641.047	452.441	635.88	186.463	191.075	172.04	576.456	183.193	1.65476	4.95968e-18	5.17145e-16	-	6	163259	165320	+	1932	protein_coding	PF00067:Cytochrome P450	p450
Os07g0178700	47.5554	43.719	82.1753	1019.79	3085.33	4486.06	57.8166	2863.73	-5.63022	4.99844e-18	5.19318e-16	-	7	4143416	4144441	+	946	protein_coding	PF00504:Chlorophyll A-B binding protein	-
Os11g0170900	23.7777	17.2843	5.86966	287.751	136.759	198.078	15.6439	207.53	-3.72612	5.38539e-18	5.57523e-16	-	11	3463917	3467995	-	2086	protein_coding	PF03181:BURP domain	-
Os12g0548700	3544.78	5792.26	5458.79	25652.4	26509	15401.8	4931.94	22521.1	-2.19106	5.81617e-18	5.99976e-16	-	12	22202703	22203153	-	451	protein_coding	-	-
Os12g0484600	282.479	355.853	221.091	61.0032	74.6842	57.6566	286.474	64.448	2.15104	5.93207e-18	6.09762e-16	-	12	17900930	17902995	+	2066	protein_coding	PF06813:Nodulin-like	-
Os01g0882800	128.4	160.642	202.503	32.2281	26.188	29.7583	163.848	29.3914	2.48217	5.99113e-18	6.13657e-16	-	1	38310588	38313631	-	1857	protein_coding	PF01490:Transmembrane amino acid transporter protein	Aa_trans
Os02g0178100	462.239	518.528	487.182	982.957	1136.75	1173.59	489.316	1097.77	-1.16675	6.44907e-18	6.58237e-16	-	2	4315391	4316956	+	1370	protein_coding	PF06203:CCT motif	CCT
Os02g0678200	19.9733	33.5518	5.86966	230.201	225.992	401.737	19.7982	285.977	-3.85699	6.62572e-18	6.73894e-16	-	2	27696289	27702009	+	2780	protein_coding	PF03105:SPX domain|PF07690:Major Facilitator Superfamily	SPX
Os12g0451300	177.857	320.267	222.069	42.5871	25.218	42.7775	240.064	36.8609	2.70584	7.54959e-18	7.65175e-16	-	12	15498809	15499781	-	973	protein_coding	-	-
Os07g0537900	241.581	187.077	183.916	577.804	525.699	548.668	204.191	550.724	-1.43008	7.61147e-18	7.68758e-16	-	7	21146543	21149741	+	2359	protein_coding	PF07714:Protein tyrosine kinase|PF01657:Salt stress response/antifungal	Pkinase_Tyr
Os02g0332800	317.67	288.749	380.55	1005.98	864.203	809.053	328.99	893.077	-1.43974	7.63823e-18	7.68782e-16	-	2	13606095	13609389	+	3295	protein_coding	-	-
Os11g0118400	62.7731	34.5685	40.1094	248.617	301.647	544.018	45.817	364.761	-2.99218	8.79783e-18	8.82431e-16	-	11	827020	828420	+	1401	protein_coding	PF03000:NPH3 family	-
Os02g0166800	122.693	158.609	183.916	28.7751	28.1278	31.6182	155.073	29.507	2.39163	1.09436e-17	1.09387e-15	-	2	3594428	3596589	+	1925	protein_coding	PF04852:Protein of unknown function (DUF640)	-
Os05g0586600	141.715	118.956	150.655	450.042	655.669	930.876	137.109	678.862	-2.3085	1.18094e-17	1.17636e-15	-	5	29225038	29227592	+	1645	protein_coding	PF04545:Sigma-70, region 4|PF04539:Sigma-70 region 3	Sigma70_r4
Os03g0170900	208.293	184.027	247.504	56.3992	61.1052	50.2171	213.274	55.9072	1.9331	1.45707e-17	1.44645e-15	-	3	3797698	3804132	-	2170	protein_coding	PF13347:MFS/sugar transport protein	-
Os06g0700300	878.824	858.113	1103.5	368.321	361.782	398.017	946.811	376.04	1.33182	1.46351e-17	1.44788e-15	-	6	29446652	29447535	-	884	protein_coding	PF14009:Domain of unknown function (DUF4228)	-
Os12g0610800	161.688	215.545	253.374	49.4931	38.797	46.4973	210.202	44.9291	2.22865	1.63153e-17	1.60316e-15	-	12	25807637	25809339	-	1103	protein_coding	PF04535:Domain of unknown function (DUF588)	-
Os08g0373000	1799.5	1705.04	2046.56	740.095	849.654	876.009	1850.36	821.919	1.16992	1.6703e-17	1.63571e-15	-	8	17451964	17455703	+	2764	protein_coding	PF00931:NB-ARC domain	NB-ARC
Os10g0470700	1155.6	1178.38	1398.94	383.284	507.271	504.961	1244.3	465.172	1.41776	1.99958e-17	1.95157e-15	-	10	17415606	17420814	+	2105	protein_coding	PF00854:POT family	-
Os04g0408600	3150.07	3407.03	3753.65	987.561	759.451	1311.22	3436.92	1019.41	1.75311	2.18406e-17	2.12447e-15	-	4	20221253	20223066	-	951	protein_coding	PF04949:Transcriptional activator	-
Os11g0543500	77.9909	85.4046	80.2187	284.298	231.812	241.786	81.2047	252.632	-1.63597	2.22079e-17	2.15298e-15	-	11	19956772	19963299	-	1644	protein_coding	PF07786:Protein of unknown function (DUF1624)	-
Os11g0155100	898.797	1061.46	1197.41	440.834	388.94	424.055	1052.56	417.943	1.33297	2.46857e-17	2.38522e-15	-	11	2568996	2570391	-	1396	protein_coding	PF12937:F-box-like	-
Os03g0323200	293.892	286.715	248.482	1070.43	1329.77	2670.8	276.363	1690.33	-2.61304	3.17049e-17	3.05325e-15	-	3	11712280	11719587	+	4227	protein_coding	PF02514:CobN/Magnesium Chelatase	-
Os03g0142600	21.8755	35.5853	36.1962	189.916	144.519	252.945	31.219	195.793	-2.65204	3.35591e-17	3.22112e-15	-	3	2341955	2343111	-	947	protein_coding	PF00249:Myb-like DNA-binding domain	Myb_DNA-binding
Os01g0854800	623.927	809.31	990.016	215.238	98.9323	133.912	807.751	149.361	2.43931	3.41659e-17	3.26854e-15	-	1	36840077	36842114	+	2038	protein_coding	PF00067:Cytochrome P450	p450
Os04g0243700	430.852	507.344	519.465	154.234	142.579	196.219	485.887	164.344	1.56163	3.47443e-17	3.31293e-15	-	4	9291339	9291856	-	518	protein_coding	PF13639:Ring finger domain	-
Os05g0441500	139.813	133.191	168.264	424.72	442.286	604.465	147.089	490.49	-1.73847	3.67609e-17	3.49373e-15	-	5	21613630	21616111	+	1685	protein_coding	-	-
Os09g0426000	332.888	280.615	320.875	803.4	669.248	802.543	311.459	758.397	-1.28308	3.79743e-17	3.59725e-15	-	9	15447741	15449982	-	1405	protein_coding	PF00892:EamA-like transporter family	DUF6
Os02g0585650	64.6754	36.602	43.0442	379.831	222.113	561.687	48.1072	387.877	-3.00977	4.03748e-17	3.8122e-15	-	2	22572227	22573341	+	695	protein_coding	-	-
Os01g0183600	875.971	858.113	948.929	295.808	294.857	403.596	894.337	331.42	1.43032	4.05705e-17	3.81824e-15	-	1	4421318	4423105	+	1788	protein_coding	PF00067:Cytochrome P450	p450
Os03g0294100	175.004	170.809	180.981	41.4361	41.7068	55.7968	175.598	46.3132	1.91676	4.19627e-17	3.93648e-15	-	3	10255888	10257612	+	882	protein_coding	-	-
Os02g0718600	1815.67	3551.41	3935.61	507.592	455.865	727.218	3100.89	563.558	2.4596	4.24153e-17	3.96611e-15	-	2	29813212	29813753	+	542	protein_coding	-	-
Os11g0637501	1402.88	1389.86	1313.83	2967.29	3211.42	2569.44	1368.86	2916.05	-1.09093	4.33611e-17	4.04151e-15	-	11	25177818	25180272	-	490	protein_coding	-	-
Os04g0521100	2280.76	1677.59	1376.44	8580.73	6038.75	5755.43	1778.26	6791.64	-1.93312	4.40119e-17	4.08902e-15	-	4	26099273	26101764	+	1273	protein_coding	PF00230:Major intrinsic protein	-
Os01g0850000	104.622	107.772	113.48	20.7181	14.5489	21.3888	108.625	18.8852	2.52713	4.63359e-17	4.29118e-15	-	1	36528042	36529841	+	1432	protein_coding	-	-
Os01g0235100	73.2353	58.9698	45.979	230.201	259.94	370.118	59.3947	286.753	-2.2722	4.68814e-17	4.32787e-15	-	1	7457835	7459834	+	957	protein_coding	-	-
Os02g0613000	159.786	172.843	135.002	421.267	401.549	390.577	155.877	404.464	-1.37551	4.75461e-17	4.37529e-15	-	2	24158318	24163085	+	1710	protein_coding	PF00036:EF hand|PF13833:EF-hand domain pair	efhand
Os02g0775400	2827.64	3317.56	3366.25	1571.12	1591.65	1457.23	3170.49	1540	1.04187	4.8072e-17	4.4097e-15	-	2	32730984	32740313	-	3315	protein_coding	-	-
Os12g0450300	119.84	112.856	90.9798	8.05702	4.84962	16.739	107.892	9.88189	3.43107	4.90301e-17	4.48339e-15	-	12	15461853	15463265	-	1413	protein_coding	PF14543:Xylanase inhibitor N-terminal|PF14541:Xylanase inhibitor C-terminal	-
Os04g0399300	617.269	544.963	580.118	1323.65	1455.86	1874.77	580.783	1551.43	-1.4179	5.61897e-17	5.12192e-15	-	4	19735871	19739665	+	1578	protein_coding	PF00293:NUDIX domain	NUDIX
Os05g0244700	13.3155	19.3177	15.6524	94.3823	98.9323	108.804	16.0952	100.706	-2.65071	5.64689e-17	5.13123e-15	-	5	8785502	8787555	-	1236	protein_coding	PF01063:Amino-transferase class IV	-
Os05g0491200	160.737	135.224	183.916	494.931	447.135	412.896	159.959	451.654	-1.49574	5.71481e-17	5.17673e-15	-	5	24137674	24141002	-	1528	protein_coding	PF16561:Glycogen recognition site of AMP-activated protein kinase|PF04739:5'-AMP-activated protein kinase beta subunit, interaction domain	-
Os07g0605400	1968.79	1703.01	1871.44	492.629	522.789	770.925	1847.75	595.448	1.63253	6.65543e-17	6.01e-15	-	7	24809650	24810354	+	705	protein_coding	-	-
Os11g0592000	226.364	422.956	204.46	1225.82	1441.31	1297.27	284.593	1321.47	-2.21604	6.81097e-17	6.13135e-15	-	11	22502008	22502923	+	743	protein_coding	PF00967:Barwin family	-
Os07g0142500	412.781	829.645	652.511	142.724	149.368	129.262	631.645	140.452	2.16909	8.11782e-17	7.28518e-15	-	7	2181829	2182635	+	807	protein_coding	-	-
Os10g0506900	453.679	347.719	433.377	1145.25	1222.1	1769.69	411.591	1379.01	-1.74451	8.2014e-17	7.33747e-15	-	10	19379767	19382017	+	2143	protein_coding	-	-
Os04g0567200	462.239	242.996	342.397	1454.87	1164.88	1562.31	349.211	1394.02	-1.99639	8.30769e-17	7.39049e-15	-	4	28500006	28502492	-	2227	protein_coding	PF11744:Aluminium activated malate transporter	-
Os06g0604600	1182.23	1058.41	1259.04	565.143	568.376	530.069	1166.56	554.529	1.07343	8.31166e-17	7.39049e-15	-	6	23949819	23950657	+	724	protein_coding	-	-
Os03g0171900	3574.26	4249.9	5494	1672.41	1400.57	1274.03	4439.39	1449	1.61568	8.5349e-17	7.56579e-15	-	3	3854304	3858338	+	2025	protein_coding	PF00202:Aminotransferase class-III	Aminotran_3
Os03g0145900	320.523	298.916	371.745	127.761	110.571	108.804	330.395	115.712	1.51707	9.06208e-17	8.00861e-15	-	3	2548699	2552574	+	2602	protein_coding	PF05495:CHY zinc finger	zf-CHY
Os12g0630600	1327.75	1470.18	1694.38	393.643	341.413	570.987	1497.43	435.348	1.78126	9.24219e-17	8.14296e-15	-	12	26985401	26986264	+	781	protein_coding	-	-
Os02g0744900	494.576	607.999	574.249	1651.69	1939.85	3110.67	558.941	2234.07	-1.99937	1.06603e-16	9.36391e-15	-	2	31246225	31248801	+	1828	protein_coding	-	-
Os02g0136900	386.15	471.759	502.834	157.687	96.0225	130.192	453.581	127.967	1.82943	1.0957e-16	9.59549e-15	-	2	1949825	1953397	+	2379	protein_coding	PF07714:Protein tyrosine kinase|PF13855:Leucine rich repeat	Pkinase_Tyr
Os12g0437800	2557.53	1814.85	2904.5	9698.35	12328.7	7088.98	2425.63	9705.35	-2.00036	1.11704e-16	9.75292e-15	-	12	14411366	14412019	-	452	protein_coding	-	-
Os01g0853700	1532.24	1249.55	1346.11	666.431	635.301	603.535	1375.97	635.089	1.11621	1.13868e-16	9.91203e-15	-	1	36763677	36765294	-	1502	protein_coding	PF00249:Myb-like DNA-binding domain	Myb_DNA-binding
Os01g0924933	764.691	1368.51	1576	262.429	122.21	204.588	1236.4	196.409	2.65602	1.21244e-16	1.05225e-14	-	1	40508920	40511048	+	1592	protein_coding	PF02458:Transferase family	-
Os03g0694500	196.879	267.398	280.765	69.0602	59.1654	71.6058	248.348	66.6105	1.89857	1.22406e-16	1.05916e-14	-	3	27812191	27815752	+	1921	protein_coding	PF00860:Permease family	-
Os01g0974400	1251.66	1091.96	1447.85	336.093	353.053	503.101	1263.82	397.415	1.6676	1.30909e-16	1.12936e-14	-	1	43063740	43065432	+	1693	protein_coding	PF12796:Ankyrin repeats (3 copies)	-
Os05g0136900	6915.51	6724.6	8980.58	2437.82	2226.95	3144.15	7540.23	2602.97	1.53431	1.32463e-16	1.13938e-14	-	5	2143896	2150179	+	1728	protein_coding	PF02458:Transferase family	-
novel.2397	85.5997	32.5351	39.1311	360.264	307.466	349.66	52.422	339.13	-2.68993	1.35408e-16	1.16127e-14	-	9	11852936	11853348	-	413	-	-	-
Os06g0131700	516.452	641.551	640.771	195.671	180.406	246.436	599.591	207.504	1.52904	1.39576e-16	1.19348e-14	-	6	1699521	1702611	-	1774	protein_coding	PF02365:No apical meristem (NAM) protein	NAM
Os12g0625200	182.613	198.261	207.395	499.535	435.496	539.369	196.089	491.467	-1.32592	1.4173e-16	1.20833e-14	-	12	26714545	26718161	-	2641	protein_coding	-	-
Os02g0663900	403.27	576.481	519.465	130.063	112.511	172.04	499.739	138.205	1.85221	1.4592e-16	1.2404e-14	-	2	26922398	26927229	-	4715	protein_coding	PF00168:C2 domain|PF08372:Plant phosphoribosyltransferase C-terminal	C2
Os10g0208500	169.297	157.592	155.546	468.458	479.143	369.188	160.812	438.93	-1.44734	1.50567e-16	1.27616e-14	-	10	7685223	7696842	+	7854	protein_coding	-	-
Os09g0494600	341.448	268.414	286.635	957.635	864.203	1452.58	298.832	1091.47	-1.86897	1.67793e-16	1.41499e-14	-	9	19166367	19167823	+	1348	protein_coding	PF04654:Protein of unknown function, DUF599	-
Os03g0734100	615.367	453.458	581.096	1427.24	2067.88	1555.8	549.974	1683.64	-1.6141	1.68456e-16	1.41499e-14	-	3	30074926	30075707	+	517	protein_coding	-	-
novel.391	149.324	136.241	187.829	32.2281	16.4887	32.5481	157.798	27.0883	2.54773	1.68862e-16	1.41499e-14	-	10	3659538	3661656	-	2119	-	PF08541:3-Oxoacyl-[acyl-carrier-protein (ACP)] synthase III C terminal|PF08392:FAE1/Type III polyketide synthase-like protein	-
Os07g0101000	1417.15	1206.85	1444.92	633.052	518.91	612.834	1356.3	588.265	1.20589	1.68899e-16	1.41499e-14	-	7	58808	60650	-	1764	protein_coding	PF07732:Multicopper oxidase|PF00394:Multicopper oxidase|PF07731:Multicopper oxidase	-
Os12g0292400	40.8977	30.5016	31.3049	153.083	258	398.947	34.2347	270.01	-2.98034	1.79742e-16	1.50149e-14	-	12	11320409	11322505	+	1994	protein_coding	PF00101:Ribulose bisphosphate carboxylase, small chain|PF12338:Ribulose-1,5-bisphosphate carboxylase small subunit	-
Os01g0804400	215.902	195.211	199.568	527.159	642.09	861.13	203.56	676.793	-1.73422	1.83538e-16	1.5288e-14	-	1	34115002	34116757	+	1756	protein_coding	PF00067:Cytochrome P450	p450
Os04g0550866	544.034	617.15	405.985	2215.68	1605.23	1516.74	522.39	1779.22	-1.76779	1.87359e-16	1.55615e-14	-	4	27595181	27595879	+	623	protein_coding	PF00230:Major intrinsic protein	-
Os01g0260100	541.181	571.397	627.076	252.07	211.444	257.595	579.885	240.369	1.27106	1.93405e-16	1.60178e-14	-	1	8734767	8741720	-	3510	protein_coding	PF00225:Kinesin motor domain	Kinesin
Os07g0678300	4508.25	4436.97	3903.32	1772.54	1557.7	2096.1	4282.85	1808.78	1.24339	1.94488e-16	1.60616e-14	-	7	28710749	28712470	+	1722	protein_coding	PF03822:NAF domain|PF00069:Protein kinase domain	Pkinase
Os06g0706100	233.973	335.518	266.091	89.7783	71.7744	72.5358	278.527	78.0295	1.83952	2.06254e-16	1.69849e-14	-	6	29828537	29831137	+	1765	protein_coding	PF00854:POT family	-
Os04g0321700	731.402	1031.97	1130.89	272.788	309.406	198.078	964.754	260.091	1.89188	2.2414e-16	1.84055e-14	-	4	14813350	14818333	-	1742	protein_coding	PF00450:Serine carboxypeptidase	Peptidase_S10
novel.2370	46.6043	29.4849	24.4569	204.879	189.135	146.931	33.5154	180.315	-2.42301	2.25954e-16	1.85021e-14	-	9	5222113	5236371	-	6408	-	PF04195:Putative gypsy type transposon	Transposase_28
Os11g0700900	2.85332	6.10033	2.93483	122.006	69.8346	70.6759	3.96283	87.5056	-4.47056	2.49886e-16	2.04041e-14	-	11	28722579	28724062	-	1484	protein_coding	PF00704:Glycosyl hydrolases family 18	-
Os01g0775400	449.874	472.775	478.377	200.275	196.895	222.257	467.009	206.475	1.17616	2.80494e-16	2.2839e-14	-	1	32788488	32792747	-	1928	protein_coding	PF01565:FAD binding domain|PF09265:Cytokinin dehydrogenase 1, FAD and cytokinin binding	FAD_binding_4
Os01g0935200	286.284	296.883	316.962	109.345	124.15	110.664	300.043	114.72	1.38578	2.88829e-16	2.34518e-14	-	1	41028860	41030025	-	1166	protein_coding	PF00808:Histone-like transcription factor (CBF/NF-Y) and archaeal histone	-
Os11g0118300	14.2666	17.2843	22.5004	118.553	92.1428	115.313	18.0171	108.67	-2.59249	3.11758e-16	2.52428e-14	-	11	823449	825737	-	2039	protein_coding	PF03000:NPH3 family	-
Os04g0418800	9270.45	9823.56	9806.25	21289	23126.9	17708	9633.42	20708	-1.10405	3.38297e-16	2.72395e-14	-	4	20708033	20709830	+	1798	protein_coding	-	-
Os02g0816600	263.457	226.729	267.07	619.24	634.331	836.951	252.418	696.841	-1.4655	3.5542e-16	2.8539e-14	-	2	35004914	35006549	-	1203	protein_coding	-	-
Os11g0267000	104.622	141.324	135.002	379.831	489.812	668.631	126.983	512.758	-2.01572	3.93048e-16	3.14732e-14	-	11	9177329	9178565	+	1237	protein_coding	PF05419:GUN4-like	-
Os01g0546400	170.248	217.578	202.503	62.1542	56.2556	52.077	196.777	56.8289	1.79527	4.01271e-16	3.20431e-14	-	1	20299783	20302467	-	1188	protein_coding	PF00892:EamA-like transporter family	DUF6
Os02g0587300	58.9687	106.756	93.9146	1.151	3.8797	5.57968	86.5463	3.53679	4.56188	4.20652e-16	3.34984e-14	-	2	22636061	22636963	+	369	protein_coding	-	-
Os01g0563000	7064.83	7698.61	9789.62	2988	2695.42	3525.42	8184.35	3069.62	1.41473	4.4669e-16	3.54745e-14	-	1	21415022	21441440	+	2517	protein_coding	-	-
Os01g0210500	776.104	844.896	992.951	2075.26	2042.66	2699.63	871.317	2272.52	-1.38331	4.7445e-16	3.75762e-14	-	1	6007921	6009027	-	952	protein_coding	PF04832:SOUL heme-binding protein	-
Os06g0539500	330.035	510.394	534.139	96.6843	45.5865	98.5743	458.189	80.2817	2.51479	5.35439e-16	4.22909e-14	-	6	20257250	20257626	-	377	protein_coding	PF00234:Protease inhibitor/seed storage/LTP family	-
Os09g0294000	299.599	386.354	289.57	776.927	813.767	929.946	325.174	840.213	-1.3707	5.42832e-16	4.27583e-14	-	9	6995055	7009477	-	3119	protein_coding	PF00696:Amino acid kinase family|PF13840:ACT domain|PF03447:Homoserine dehydrogenase, NAD binding domain|PF00742:Homoserine dehydrogenase	AA_kinase
Os02g0686800	129.351	116.923	144.785	31.0771	22.3083	13.9492	130.353	22.4448	2.55806	6.08149e-16	4.76823e-14	-	2	28136347	28137459	-	1033	protein_coding	PF04570:zinc-finger of the FCS-type, C2-C2	-
Os05g0355400	40.8977	42.7023	64.5663	306.167	234.722	185.989	49.3887	242.293	-2.29217	6.08633e-16	4.76823e-14	-	5	16859727	16860956	+	1230	protein_coding	-	-
Os03g0294032	225.413	258.247	342.397	64.4562	78.5639	78.1155	275.352	73.7118	1.89761	6.13664e-16	4.79469e-14	-	3	10252143	10258334	-	2452	protein_coding	-	-
Os07g0643800	422.292	678.153	734.686	150.781	64.015	88.3449	611.71	101.047	2.60332	6.91353e-16	5.36046e-14	-	7	26802460	26803443	+	984	protein_coding	-	-
Os10g0100700	3.80443	3.05016	4.89138	43.7381	209.504	270.614	3.91533	174.619	-5.47895	6.91624e-16	5.36046e-14	-	10	81102	82243	-	1142	protein_coding	PF01680:SOR/SNZ family	-
novel.1505	41.8488	30.5016	59.6749	202.577	198.835	179.48	44.0084	193.63	-2.13488	7.47872e-16	5.78095e-14	-	4	33351823	33352764	-	942	-	-	-
Os11g0668650	463.19	367.036	439.246	887.423	1002.9	979.233	423.158	956.519	-1.17653	7.61941e-16	5.87404e-14	-	11	26984222	26986477	-	1604	protein_coding	PF07887:Calmodulin binding protein-like	-
Os01g0855000	907.357	1318.69	1451.76	432.777	313.286	326.411	1225.94	357.491	1.77933	7.77786e-16	5.98029e-14	-	1	36863177	36871094	-	5696	protein_coding	-	-
Os02g0668500	99.8664	108.789	187.829	908.142	627.541	517.05	132.162	684.244	-2.37139	8.02166e-16	6.15142e-14	-	2	27137230	27138285	-	1056	protein_coding	PF13716:Divergent CRAL/TRIO domain	-
Os01g0938100	45.6532	56.9364	61.6314	179.557	269.639	324.551	54.7403	257.916	-2.23956	8.09175e-16	6.1888e-14	-	1	41187052	41188691	+	719	protein_coding	PF03912:Psb28 protein	-
EPlOSAG00000022933	31.3866	24.4013	23.4786	125.459	116.391	170.18	26.4222	137.343	-2.37791	8.29081e-16	6.32436e-14	-	5	29226006	29226034	-	29	ncRNA	-	-
Os03g0167000	13.3155	25.418	22.5004	187.614	105.722	138.562	20.4113	143.966	-2.81962	8.57868e-16	6.52678e-14	-	3	3626392	3628578	+	901	protein_coding	PF14368:Probable lipid transfer	-
Os01g0329900	1206.96	1807.73	1498.72	501.837	512.12	600.745	1504.47	538.234	1.48217	9.04648e-16	6.86467e-14	-	1	12734098	12738081	+	2009	protein_coding	PF00657:GDSL-like Lipase/Acylhydrolase	Lipase_GDSL
Os07g0599900	1192.69	2187.98	2165.91	451.193	396.699	537.509	1848.86	461.8	2.00095	9.45707e-16	7.1575e-14	-	7	24481260	24481937	-	678	protein_coding	-	-
Os01g0802600	107.475	124.04	124.241	19.5671	18.4286	29.7583	118.585	22.5846	2.38267	1.01746e-15	7.68051e-14	-	1	33996722	33998005	+	1284	protein_coding	-	-
Os06g0568600	762.789	546.996	585.988	113.949	210.474	129.262	631.924	151.228	2.06079	1.0444e-15	7.8634e-14	-	6	21982654	21992533	-	1803	protein_coding	PF00067:Cytochrome P450	p450
Os08g0453700	1361.99	1745.71	2257.86	547.878	536.368	638.873	1788.52	574.373	1.63831	1.18575e-15	8.88149e-14	-	8	22210390	22219247	+	3061	protein_coding	PF08022:FAD-binding domain|PF01794:Ferric reductase like transmembrane component|PF08030:Ferric reductase NAD binding domain|PF08414:Respiratory burst NADPH oxidase	FAD_binding_8
Os04g0561800	101.769	78.2876	192.721	8.05702	9.69925	11.1594	124.259	9.63854	3.68008	1.20218e-15	8.98135e-14	-	4	28123589	28125096	-	1165	protein_coding	PF00657:GDSL-like Lipase/Acylhydrolase	Lipase_GDSL
Os04g0400600	136.008	124.04	149.676	29.9261	29.0977	38.1278	136.575	32.3839	2.07161	1.22816e-15	9.15184e-14	-	4	19819412	19820288	-	877	protein_coding	-	-
Os07g0241500	147.422	154.542	168.264	31.0771	40.7368	47.4272	156.742	39.7471	1.96902	1.27959e-15	9.51067e-14	-	7	7900573	7902415	+	1618	protein_coding	PF00201:UDP-glucoronosyl and UDP-glucosyl transferase	UDPGT
novel.1976	259.653	338.568	340.44	87.4762	101.842	112.523	312.887	100.614	1.6324	1.3855e-15	1.02715e-13	-	7	28050719	28053703	+	1856	-	PF13561:Enoyl-(Acyl carrier protein) reductase	-
Os04g0129900	268.213	366.02	332.614	102.439	109.601	115.313	322.282	109.118	1.55995	1.44143e-15	1.06588e-13	-	4	1874562	1876811	-	2115	protein_coding	PF02212:Dynamin GTPase effector domain|PF01031:Dynamin central region|PF00350:Dynamin family	-
Os10g0532300	1487.53	1252.6	1353.94	4660.41	3483.97	3078.12	1364.69	3740.83	-1.45443	1.62489e-15	1.19849e-13	-	10	20702195	20703525	-	931	protein_coding	PF00403:Heavy-metal-associated domain	HMA
Os04g0670500	8.55997	8.13377	14.6742	75.9662	84.3834	88.3449	10.456	82.8982	-2.98762	1.6331e-15	1.20149e-13	-	4	34205994	34207906	+	1720	protein_coding	PF00396:Granulin|PF08246:Cathepsin propeptide inhibitor domain (I29)|PF00112:Papain family cysteine protease	Peptidase_C1
novel.643	32.3377	34.5685	17.609	146.177	128.03	146.001	28.1717	140.07	-2.31442	1.69533e-15	1.24098e-13	-	11	28696645	28697535	-	789	-	-	-
Os07g0448100	15876.9	13032.3	12434.9	44272.2	32423.6	32430.9	13781.4	36375.6	-1.40022	1.76324e-15	1.28743e-13	-	7	15358960	15360391	+	1214	protein_coding	PF00230:Major intrinsic protein	-
Os01g0196300	1160.35	902.849	1326.54	183.01	289.038	358.029	1129.91	276.692	2.02733	2.02749e-15	1.47665e-13	-	1	5201862	5203996	+	1749	protein_coding	PF00010:Helix-loop-helix DNA-binding domain	HLH
Os10g0556200	277.724	341.618	424.572	1064.68	1339.47	2054.25	347.971	1486.13	-2.09509	2.03498e-15	1.47839e-13	-	10	21863032	21867667	-	1914	protein_coding	PF00010:Helix-loop-helix DNA-binding domain	HLH
Os08g0189900	1164.16	672.053	1122.08	2991.46	3445.17	3205.52	986.098	3214.05	-1.7044	2.08578e-15	1.51152e-13	-	8	5260239	5261296	+	867	protein_coding	PF00190:Cupin	-
Os05g0226900	2270.3	2107.66	2869.29	784.984	577.105	929.946	2415.75	764.012	1.66075	2.0999e-15	1.51795e-13	-	5	7721638	7723146	-	1509	protein_coding	-	-
Os04g0338100	744.718	580.548	773.817	217.54	198.835	284.563	699.694	233.646	1.58116	2.17436e-15	1.56787e-13	-	4	15924375	15928109	+	1078	protein_coding	PF00248:Aldo/keto reductase family	Aldo_ket_red
Os02g0626400	35033.1	37182.5	45623.9	12686.4	13650.7	17883.8	39279.8	14740.3	1.41398	2.45639e-15	1.7625e-13	-	2	24985256	24989388	-	2631	protein_coding	PF00221:Aromatic amino acid lyase	-
Os05g0148700	416.585	362.97	397.18	924.256	877.782	1205.21	392.245	1002.42	-1.35392	2.45645e-15	1.7625e-13	-	5	2786118	2791149	+	1880	protein_coding	-	-
Os07g0624100	24.7288	21.3512	18.5873	115.1	94.0827	122.753	21.5557	110.645	-2.35834	2.55683e-15	1.82999e-13	-	7	25839984	25842020	-	1187	protein_coding	PF05699:hAT family C-terminal dimerisation region|PF14372:Domain of unknown function (DUF4413)	hATC
Os07g0689600	1731.97	1538.3	1959.49	675.639	779.819	826.722	1743.25	760.727	1.19552	2.66256e-15	1.90098e-13	-	7	29323098	29324607	+	1510	protein_coding	PF03059:Nicotianamine synthase protein	-
Os01g0609300	364.274	334.501	377.615	149.63	150.338	158.091	358.797	152.687	1.23205	2.80038e-15	1.99446e-13	-	1	24075070	24081389	-	4224	protein_coding	PF01061:ABC-2 type transporter	ABC2_membrane
Os02g0522300	578.274	519.545	467.616	1122.23	1075.65	1275.89	521.812	1157.92	-1.15002	2.83754e-15	2.01598e-13	-	2	19044957	19050756	-	5572	protein_coding	-	-
Os11g0626700	19.0222	16.2675	5.86966	112.798	121.241	233.416	13.7198	155.818	-3.50677	2.93951e-15	2.08332e-13	-	11	24561650	24570319	+	3307	protein_coding	-	-
Os11g0694100	690.505	568.347	570.335	273.939	255.09	224.117	609.729	251.049	1.28243	3.14333e-15	2.22234e-13	-	11	28356988	28362710	+	2416	protein_coding	PF13947:Wall-associated receptor kinase galacturonan-binding|PF00069:Protein kinase domain	Pkinase
Os02g0782900	523.11	284.682	420.659	1647.09	1446.16	1242.41	409.484	1445.22	-1.81856	3.2546e-15	2.2954e-13	-	2	33220361	33221120	+	560	protein_coding	-	-
Os06g0159600	1580.74	1386.81	1689.48	3052.46	2972.82	3336.65	1552.34	3120.64	-1.00736	3.28183e-15	2.30899e-13	-	6	3042190	3046129	+	2221	protein_coding	-	-
Os11g0160550	45.6532	25.418	36.1962	187.614	136.759	199.008	35.7558	174.46	-2.28272	3.35612e-15	2.35554e-13	-	11	2950018	2951434	+	1417	protein_coding	PF03514:GRAS domain family	GRAS
Os08g0352100	136.96	110.823	84.1318	328.036	398.639	353.379	110.638	360.018	-1.70212	3.4517e-15	2.41665e-13	-	8	16064547	16065718	-	663	protein_coding	-	-
Os06g0704700	47.5554	49.8194	49.8921	196.822	258.97	482.642	49.089	312.811	-2.6738	3.45986e-15	2.41665e-13	-	6	29762530	29766745	-	2195	protein_coding	PF13460:NAD(P)H-binding|PF08547:Complex I intermediate-associated protein 30 (CIA30)	-
Os01g0754800	44.7021	55.9197	38.1528	257.825	162.947	191.569	46.2582	204.114	-2.1405	3.5262e-15	2.45707e-13	-	1	31669359	31670159	-	801	protein_coding	-	-
novel.2330	48.5065	22.3679	24.4569	203.728	152.278	187.849	31.7771	181.285	-2.50677	3.72202e-15	2.58729e-13	-	9	18123475	18128746	+	2540	-	-	-
Os09g0508000	216.853	152.508	218.156	1111.87	766.24	584.006	195.839	820.705	-2.06573	3.82989e-15	2.65591e-13	-	9	19691511	19696029	+	1773	protein_coding	PF01190:Pollen proteins Ole e I like	-
Os06g0697600	277.724	230.796	220.112	568.596	592.624	727.218	242.877	629.479	-1.3743	3.87532e-15	2.681e-13	-	6	29184407	29186298	-	1892	protein_coding	PF14363:Domain associated at C-terminal with AAA|PF00004:ATPase family associated with various cellular activities (AAA)	AAA
Os05g0514400	624.878	877.431	871.645	311.922	276.428	296.653	791.318	295.001	1.42393	4.00129e-15	2.76156e-13	-	5	25503455	25505085	-	1533	protein_coding	PF05097:Protein of unknown function (DUF688)	-
Os01g0942300	64.6754	49.8194	47.9356	204.879	178.466	271.544	54.1434	218.296	-2.01119	4.18924e-15	2.88441e-13	-	1	41398051	41398544	-	494	protein_coding	PF00332:Glycosyl hydrolases family 17	Glyco_hydro_17
Os12g0623900	32494.6	39628.8	36275.5	14435.9	16601.2	18475.2	36133	16504.1	1.13043	4.24646e-15	2.91688e-13	-	12	26645025	26651101	+	2689	protein_coding	PF01717:Cobalamin-independent synthase, Catalytic domain	-
Os10g0394000	1977.35	2214.42	2760.7	980.655	1009.69	976.443	2317.49	988.93	1.22857	4.62376e-15	3.16854e-13	-	10	13142398	13144630	+	1462	protein_coding	PF00657:GDSL-like Lipase/Acylhydrolase	Lipase_GDSL
Os11g0482901	841.731	815.411	1049.69	359.113	409.308	382.208	902.278	383.543	1.23349	4.95148e-15	3.38511e-13	-	11	16985402	16987473	-	2072	protein_coding	PF00067:Cytochrome P450	p450
Os01g0114100	263.457	241.98	276.852	680.243	571.286	557.038	260.763	602.855	-1.20747	5.2145e-15	3.55654e-13	-	1	767181	769673	-	2239	protein_coding	PF00069:Protein kinase domain|PF13947:Wall-associated receptor kinase galacturonan-binding	Pkinase
Os04g0594100	1453.29	1788.41	1666.98	544.425	571.286	766.275	1636.23	627.328	1.38191	5.26688e-15	3.58383e-13	-	4	30028840	30030685	-	1636	protein_coding	PF00249:Myb-like DNA-binding domain	Myb_DNA-binding
novel.1802	133.155	105.739	85.1101	326.885	314.256	376.628	108.001	339.256	-1.65095	5.44066e-15	3.6934e-13	-	6	3234270	3239238	-	3675	-	PF00931:NB-ARC domain	NB-ARC
Os03g0237100	57.0665	55.9197	52.827	209.483	161.977	178.55	55.271	183.337	-1.72741	5.62039e-15	3.8065e-13	DMAS1	3	7229093	7231670	+	1284	protein_coding	PF00248:Aldo/keto reductase family	Aldo_ket_red
Os01g0595201	137.911	262.314	199.568	34.5301	29.0977	44.6374	199.931	36.0884	2.4663	5.71379e-15	3.85346e-13	-	1	23324460	23325125	+	401	protein_coding	PF00403:Heavy-metal-associated domain	HMA
Os08g0546100	10184.5	13270.2	12968	5009.17	4790.46	5880.98	12140.9	5226.87	1.21578	5.71632e-15	3.85346e-13	-	8	27357179	27358774	-	1462	protein_coding	PF02179:BAG domain	-
Os11g0139700	2804.82	2199.17	2987.66	6886.45	5789.48	6055.81	2663.88	6243.91	-1.22875	5.83106e-15	3.92169e-13	-	11	1835867	1837930	-	2064	protein_coding	-	-
Os01g0778500	201.635	201.311	259.243	57.5502	24.2481	47.4272	220.73	43.0752	2.36555	6.1015e-15	4.09408e-13	-	1	32947996	32948879	-	777	protein_coding	-	-
Os03g0154000	821.758	602.916	688.707	272.788	174.586	233.416	704.46	226.93	1.63672	7.21178e-15	4.8279e-13	-	3	2961746	2964295	+	1517	protein_coding	PF01494:FAD binding domain	FAD_binding_3
Os02g0325600	26.631	38.6354	30.3266	125.459	127.06	160.881	31.8643	137.8	-2.11739	7.73466e-15	5.16601e-13	-	2	13096088	13098218	+	1691	protein_coding	PF00249:Myb-like DNA-binding domain	Myb_DNA-binding
Os08g0335600	1502.75	3102.02	2382.1	662.978	416.098	519.84	2328.96	532.972	2.12821	7.86857e-15	5.24336e-13	-	8	15008765	15009689	+	925	protein_coding	PF04526:Protein of unknown function (DUF568)	-
Os06g0470350	17.1199	17.2843	13.6959	87.4762	86.3233	120.893	16.0334	98.2308	-2.6179	7.97604e-15	5.29807e-13	-	6	15612239	15613211	+	973	protein_coding	-	-
Os01g0953600	3160.53	4306.83	4275.07	1474.44	1545.09	1773.41	3914.14	1597.64	1.29242	7.98722e-15	5.29807e-13	-	1	42003971	42009785	-	3052	protein_coding	PF03358:NADPH-dependent FMN reductase	FMN_red
Os02g0628200	1569.33	2411.66	2317.54	749.303	719.684	809.053	2099.51	759.347	1.46699	8.43203e-15	5.58035e-13	-	2	25119080	25122933	+	1569	protein_coding	PF03151:Triose-phosphate Transporter family	-
Os09g0491740	355.714	214.528	265.113	864.403	766.24	978.303	278.452	869.649	-1.64227	8.66833e-15	5.72367e-13	-	9	18978153	18983471	-	2345	protein_coding	PF03547:Membrane transport protein	-
Os05g0194900	148.373	107.772	160.437	665.28	542.188	1406.08	138.861	871.182	-2.64938	9.45693e-15	6.23018e-13	-	5	5814320	5815467	+	1064	protein_coding	PF00365:Phosphofructokinase	PFK
Os07g0599700	1044.32	2138.17	1999.6	423.569	262.85	411.036	1727.36	365.818	2.23978	1.01045e-14	6.64168e-13	-	7	24477380	24478153	-	774	protein_coding	-	-
Os08g0298700	66.5776	135.224	128.154	5.75502	10.6692	13.9492	109.985	10.1245	3.41784	1.05788e-14	6.93774e-13	-	8	12115583	12121337	+	1750	protein_coding	PF07993:Male sterility protein|PF03015:Male sterility protein	NAD_binding_4
Os08g0189600	1482.78	1354.27	2005.47	5028.73	4492.69	3824.87	1614.17	4448.76	-1.46244	1.08579e-14	7.10468e-13	-	8	5242497	5243656	+	982	protein_coding	PF00190:Cupin	-
Os09g0115900	75.1376	48.8026	57.7183	217.54	187.195	241.786	60.5528	215.507	-1.82928	1.19698e-14	7.81462e-13	-	9	1255785	1257020	+	1150	protein_coding	-	-
Os08g0131300	93.2086	84.3879	116.415	6.90602	5.81955	17.669	98.0038	10.1315	3.25088	1.20773e-14	7.86708e-13	-	8	1757687	1759219	-	1533	protein_coding	PF12710:haloacid dehalogenase-like hydrolase	-
Os03g0599000	213.999	165.726	185.873	424.72	451.985	477.062	188.533	451.256	-1.25888	1.22661e-14	7.97211e-13	-	3	22347751	22351524	-	3774	protein_coding	PF00931:NB-ARC domain	NB-ARC
Os04g0475600	967.277	1061.46	1034.04	2230.64	2002.89	2738.69	1020.92	2324.08	-1.18704	1.34094e-14	8.69573e-13	-	4	23795593	23797531	-	1621	protein_coding	PF03171:2OG-Fe(II) oxygenase superfamily|PF14226:non-haem dioxygenase in morphine synthesis N-terminal	2OG-FeII_Oxy
Os03g0304100	103.671	135.224	173.155	21.8691	26.188	29.7583	137.35	25.9384	2.39712	1.5189e-14	9.82773e-13	-	3	10748551	10749553	-	718	protein_coding	-	-
Os10g0204400	193.075	135.224	139.894	494.931	404.459	568.197	156.064	489.196	-1.6474	1.53983e-14	9.94102e-13	-	10	7438368	7444003	-	2250	protein_coding	PF01293:Phosphoenolpyruvate carboxykinase	-
Os12g0112000	539.278	732.039	787.513	165.744	154.218	252.015	686.277	190.659	1.84554	1.56587e-14	1.00643e-12	-	12	623582	626113	+	1318	protein_coding	PF00141:Peroxidase	-
Os03g0179400	2437.69	2419.8	2973.96	1209.7	1228.89	1346.56	2610.48	1261.72	1.04866	1.62321e-14	1.04098e-12	-	3	4173178	4179068	+	1820	protein_coding	PF07714:Protein tyrosine kinase	Pkinase_Tyr
Os03g0618300	1033.85	826.595	1088.82	2676.08	2108.62	3013.95	983.09	2599.55	-1.40272	1.65116e-14	1.05656e-12	-	3	23450188	23452171	-	1336	protein_coding	PF03171:2OG-Fe(II) oxygenase superfamily|PF14226:non-haem dioxygenase in morphine synthesis N-terminal	2OG-FeII_Oxy
Os03g0413100	452.728	468.709	511.639	193.369	198.835	233.416	477.692	208.54	1.19354	1.72319e-14	1.10023e-12	-	3	17092073	17096270	+	2828	protein_coding	-	-
Os09g0460100	883.58	902.849	1159.26	218.691	185.256	357.099	981.895	253.682	1.95093	1.7877e-14	1.1389e-12	-	9	17399884	17401177	+	1163	protein_coding	-	-
Os03g0638900	220.657	290.782	261.2	75.9662	60.1353	92.0646	257.546	76.0554	1.75788	1.80496e-14	1.14738e-12	-	3	24487877	24489307	-	1431	protein_coding	PF12937:F-box-like	-
Os11g0679700	114.133	75.2374	72.3925	12.661	9.69925	9.29946	87.2543	10.5532	3.06008	1.88863e-14	1.19794e-12	-	11	27486903	27490269	+	1952	protein_coding	PF01553:Acyltransferase	Acyltransferase
Os06g0125400	775.153	744.24	1062.41	305.016	350.143	310.602	860.601	321.92	1.41824	1.9628e-14	1.23956e-12	-	6	1365218	1368983	-	2292	protein_coding	PF03169:OPT oligopeptide transporter protein	OPT
Os11g0291475	810.344	1071.62	1291.33	3337.91	2753.62	2762.87	1057.76	2951.46	-1.48037	2.11818e-14	1.33188e-12	-	11	10610057	10615844	+	2324	protein_coding	PF14310:Fibronectin type III-like domain|PF01915:Glycosyl hydrolase family 3 C-terminal domain	Glyco_hydro_3_C
Os11g0134900	3.80443	5.08361	3.91311	112.798	80.5037	48.3572	4.26705	80.5531	-4.23744	2.18521e-14	1.37106e-12	-	11	1618494	1623978	-	1875	protein_coding	PF07690:Major Facilitator Superfamily	MFS_1
Os02g0177600	6694.85	7493.24	7902.52	2128.2	2310.36	3385.93	7363.54	2608.17	1.49706	2.23911e-14	1.40184e-12	4CL3	2	4280502	4285929	+	2043	protein_coding	PF00501:AMP-binding enzyme|PF13193:AMP-binding enzyme C-terminal domain	AMP-binding
Os02g0529800	103.671	67.1036	99.7842	5.75502	12.609	13.0192	90.1862	10.4611	3.08424	2.26502e-14	1.415e-12	-	2	19459224	19463361	-	1542	protein_coding	PF00067:Cytochrome P450	p450
Os03g0333400	35.191	37.6187	20.5438	145.026	253.15	463.113	31.1178	287.097	-3.20789	2.29946e-14	1.43343e-12	-	3	12320931	12321796	+	866	protein_coding	PF13326:Photosystem II Pbs27	-
Os03g0641250	969.179	744.24	1151.43	269.335	365.662	323.621	954.95	319.539	1.57823	2.40996e-14	1.49909e-12	-	3	24693330	24698163	+	1756	protein_coding	PF13520:Amino acid permease|PF13906:C-terminus of AA_permease	-
Os04g0560100	447.972	676.12	678.924	191.067	133.85	197.149	601.005	174.022	1.78866	2.49364e-14	1.54782e-12	-	4	28061427	28063632	-	2206	protein_coding	PF00067:Cytochrome P450	p450
Os03g0146200	237.777	268.414	269.026	661.827	598.443	523.56	258.406	594.61	-1.20146	2.51315e-14	1.5566e-12	-	3	2562873	2564200	+	1023	protein_coding	-	-
Os01g0202800	136.008	145.391	225.982	37.9831	15.5188	23.2486	169.127	25.5835	2.74019	2.61507e-14	1.61627e-12	-	1	5663306	5665832	-	821	protein_coding	PF00230:Major intrinsic protein	-
Os11g0108800	1770.01	1995.82	2161.99	1041.66	874.872	947.615	1975.94	954.715	1.04994	3.11467e-14	1.92096e-12	-	11	397403	401779	-	2355	protein_coding	PF00069:Protein kinase domain	Pkinase
Os12g0453500	195.928	300.95	234.786	65.6072	41.7068	68.816	243.888	58.71	2.0558	3.1873e-14	1.96157e-12	-	12	15639469	15640442	+	974	protein_coding	-	-
Os01g0368000	275.821	296.883	360.006	101.288	93.1128	123.683	310.903	106.028	1.54993	3.24487e-14	1.99278e-12	-	1	15085497	15086919	+	1377	protein_coding	PF00743:Flavin-binding monooxygenase-like	FMO-like
Os03g0576200	107.475	129.124	88.0449	3.45301	18.4286	6.50962	108.215	9.46373	3.49121	3.27956e-14	2.00982e-12	-	3	21060638	21064968	-	2400	protein_coding	PF02705:K+ potassium transporter	K_trans
Os07g0544800	190.222	269.431	169.242	641.109	864.203	1312.15	209.632	939.155	-2.16468	3.35039e-14	2.0489e-12	-	7	21574446	21576033	+	961	protein_coding	PF05757:Oxygen evolving enhancer protein 3 (PsbQ)	-
Os01g0382450	36.1421	30.5016	31.3049	150.781	113.481	128.333	32.6495	130.865	-1.999	3.41508e-14	2.08406e-12	-	1	15960361	15962152	-	794	protein_coding	-	-
Os01g0866400	47.5554	74.2207	46.9573	187.614	317.165	384.068	56.2445	296.282	-2.4009	3.47543e-14	2.11643e-12	-	1	37519585	37522414	+	1375	protein_coding	PF00316:Fructose-1-6-bisphosphatase, N-terminal domain	-
Os03g0126450	144.568	155.558	168.264	42.5871	49.4662	50.2171	156.13	47.4234	1.71429	3.54166e-14	2.14775e-12	-	3	1505340	1508525	-	1014	protein_coding	PF04844:Transcriptional repressor, ovate	-
Os03g0849900	673.385	1056.37	860.884	286.6	322.985	232.486	863.547	280.69	1.62158	3.77548e-14	2.28476e-12	-	3	35766964	35768997	+	1474	protein_coding	PF03407:Nucleotide-diphospho-sugar transferase	-
Os11g0444700	60.8709	33.5518	76.3056	247.466	241.511	344.08	56.9094	277.686	-2.28553	3.79314e-14	2.29066e-12	-	11	14705242	14706300	+	967	protein_coding	PF00564:PB1 domain	-
Os02g0751300	133.155	135.224	126.198	40.2851	36.8571	35.3379	131.526	37.4934	1.8144	3.92999e-14	2.36837e-12	-	2	31575903	31577560	+	773	protein_coding	PF04570:zinc-finger of the FCS-type, C2-C2	-
Os04g0616900	148.373	147.425	139.894	315.375	333.654	371.048	145.23	340.026	-1.22867	3.96888e-14	2.38684e-12	-	4	31340285	31344722	+	1577	protein_coding	-	-
Os05g0135700	7343.51	8189.69	8016.98	3138.79	3160.01	4194.99	7850.06	3497.93	1.16598	4.0683e-14	2.44157e-12	-	5	2089037	2091950	+	1593	protein_coding	PF00438:S-adenosylmethionine synthetase, N-terminal domain|PF02772:S-adenosylmethionine synthetase, central domain|PF02773:S-adenosylmethionine synthetase, C-terminal domain	-
Os07g0654700	560.203	572.414	396.202	143.875	182.346	185.989	509.606	170.737	1.57487	4.26265e-14	2.55292e-12	-	7	27501837	27507177	+	2974	protein_coding	-	-
Os09g0511200	97.9641	76.2541	78.2622	4.60401	9.69925	14.8791	84.1601	9.72746	3.08087	4.29308e-14	2.56585e-12	-	9	19868099	19868847	+	749	protein_coding	-	-
Os07g0142600	157.884	320.267	239.678	24.1711	15.5188	47.4272	239.276	29.039	3.0352	4.32669e-14	2.58061e-12	-	7	2184250	2184996	+	747	protein_coding	-	-
Os03g0661600	295.795	228.762	379.571	786.135	959.255	912.277	301.376	885.889	-1.55552	4.37213e-14	2.60236e-12	-	3	25972352	25973470	-	1119	protein_coding	PF00314:Thaumatin family	Thaumatin
Os12g0482500	431.803	484.976	531.204	215.238	194.955	221.327	482.661	210.507	1.19718	4.50399e-14	2.67535e-12	-	12	17779264	17782698	-	1698	protein_coding	-	-
novel.536	340.497	285.699	353.158	119.704	128.03	138.562	326.451	128.765	1.34025	4.9806e-14	2.95241e-12	-	11	27006641	27010446	+	2636	-	PF00069:Protein kinase domain	Pkinase
Os05g0360400	2283.61	1753.84	1855.79	4889.46	3958.26	4361.45	1964.42	4403.06	-1.16415	5.13088e-14	3.03528e-12	-	5	17175702	17176974	+	1273	protein_coding	PF13639:Ring finger domain	-
Os06g0651100	1540.8	1524.07	2046.56	742.397	718.714	767.205	1703.81	742.772	1.19774	5.29402e-14	3.11906e-12	-	6	26652924	26659231	-	1370	protein_coding	PF01370:NAD dependent epimerase/dehydratase family	Epimerase
Os06g0104900	109.377	96.5885	119.35	20.7181	23.2782	9.29946	108.439	17.7652	2.62209	5.41623e-14	3.18459e-12	-	6	347009	348516	-	1508	protein_coding	PF00056:lactate/malate dehydrogenase, NAD binding domain|PF02866:lactate/malate dehydrogenase, alpha/beta C-terminal domain	-
Os03g0624600	244.435	302.983	370.767	80.5702	43.6466	84.6251	306.062	69.614	2.13828	5.55767e-14	3.26114e-12	-	3	23734580	23736562	+	1345	protein_coding	PF02365:No apical meristem (NAM) protein	NAM
Os01g0138800	227.315	268.414	300.331	599.673	838.015	689.09	265.353	708.926	-1.41875	5.82398e-14	3.4105e-12	-	1	2071843	2073609	+	1564	protein_coding	PF07722:Peptidase C26	-
Os12g0466200	1531.28	978.086	1282.52	3362.08	3009.68	3677.01	1263.96	3349.59	-1.40583	6.39646e-14	3.73819e-12	-	12	16519753	16520222	+	470	protein_coding	-	-
Os05g0245300	1503.7	2055.81	2611.02	689.451	741.992	637.013	2056.84	689.485	1.57685	6.53004e-14	3.80858e-12	-	5	8846666	8848604	-	734	protein_coding	PF04535:Domain of unknown function (DUF588)	-
Os01g0269800	154.08	179.96	219.134	57.5502	50.4361	53.0069	184.391	53.6644	1.78294	6.63727e-14	3.86335e-12	-	1	9316276	9318060	+	1785	protein_coding	PF00931:NB-ARC domain	NB-ARC
Os06g0725000	285.332	346.702	276.852	822.967	752.661	632.363	302.962	735.997	-1.2802	6.99924e-14	4.06587e-12	-	6	30823392	30825734	-	999	protein_coding	PF00581:Rhodanese-like domain	Rhodanese
Os06g0472000	101.769	83.3712	114.458	284.298	385.06	543.088	99.866	404.149	-2.01787	7.16982e-14	4.15663e-12	-	6	15718546	15721230	-	1297	protein_coding	-	-
novel.1136	22.8266	11.1839	14.6742	101.288	83.4135	109.734	16.2282	98.1451	-2.59026	7.28838e-14	4.21693e-12	-	3	22982588	22986484	+	3749	-	-	-
Os03g0637600	1774.77	2205.27	2373.3	596.22	572.255	909.487	2117.78	692.654	1.61153	7.43355e-14	4.29236e-12	-	3	24401251	24402892	-	1642	protein_coding	-	-
Os03g0775700	1143.23	1106.19	1278.61	529.461	514.06	631.433	1176.01	558.318	1.07397	7.65864e-14	4.40478e-12	-	3	32164807	32168423	+	3120	protein_coding	PF14383:DUF761-associated sequence motif	-
novel.1125	11.4133	9.15049	7.82622	74.8152	61.1052	88.3449	9.46334	74.7551	-2.98021	7.89066e-14	4.52029e-12	-	3	19864725	19871009	+	2470	-	-	-
Os01g0926400	719.038	794.059	652.511	307.318	343.353	357.099	721.869	335.923	1.10189	8.38459e-14	4.79377e-12	-	1	40615704	40619630	-	1878	protein_coding	PF03016:Exostosin family	-
Os06g0532500	1.90222	3.05016	2.93483	70.2112	51.406	59.5165	2.62907	60.3779	-4.52433	8.41149e-14	4.79968e-12	-	6	19904206	19904580	-	375	protein_coding	-	-
Os02g0822900	124.595	80.321	102.719	348.754	273.519	365.469	102.545	329.247	-1.68098	8.44516e-14	4.80943e-12	-	2	35334956	35340821	+	3070	protein_coding	PF04564:U-box domain|PF00069:Protein kinase domain	U-box
Os06g0600400	603.003	660.869	766.969	311.922	301.647	317.112	676.947	310.227	1.12563	8.90469e-14	5.05128e-12	-	6	23704715	23707248	+	2150	protein_coding	PF00067:Cytochrome P450	p450
Os01g0920700	963.473	840.829	1146.54	404.002	389.91	456.603	983.614	416.838	1.23821	9.19978e-14	5.20847e-12	-	1	40190285	40203691	+	1320	protein_coding	PF03407:Nucleotide-diphospho-sugar transferase	-
novel.411	965.375	460.575	645.663	140.422	168.767	189.709	690.537	166.299	2.05255	9.79815e-14	5.53643e-12	-	10	11353919	11371922	-	1173	-	-	-
Os10g0560400	19.9733	27.4515	26.4135	94.3823	159.068	202.728	24.6127	152.059	-2.63241	9.94414e-14	5.60799e-12	-	10	22069784	22072449	-	1258	protein_coding	PF06203:CCT motif	CCT
Os04g0445100	38.9954	26.4348	36.1962	134.667	152.278	249.225	33.8755	178.724	-2.39992	1.07339e-13	6.02991e-12	-	4	22200999	22201929	+	931	protein_coding	PF00011:Hsp20/alpha crystallin family	-
Os07g0178800	28.5332	74.2207	98.806	1041.66	2747.8	3911.35	67.1866	2566.94	-5.25618	1.08336e-13	6.07416e-12	-	7	4145912	4146853	+	847	protein_coding	PF00504:Chlorophyll A-B binding protein	-
Os07g0418600	5.70665	1.01672	6.84794	79.4192	63.0451	198.078	4.52377	113.514	-4.64121	1.08962e-13	6.09745e-12	-	7	13354235	13355291	-	1057	protein_coding	-	-
Os03g0847900	944.45	991.303	1128.93	397.096	378.271	511.47	1021.56	428.946	1.25077	1.11051e-13	6.20238e-12	-	3	35657493	35659395	+	1903	protein_coding	PF00786:P21-Rho-binding domain	PBD
Os05g0110100	125.546	133.191	161.416	348.754	383.12	504.961	140.051	412.278	-1.55921	1.16942e-13	6.51887e-12	-	5	542178	542952	+	775	protein_coding	-	-
Os06g0109500	1185.08	1452.89	1575.03	529.461	647.91	637.013	1404.33	604.795	1.21428	1.24633e-13	6.93423e-12	-	6	555518	556419	-	902	protein_coding	PF13419:Haloacid dehalogenase-like hydrolase	-
Os01g0859200	205.439	266.381	249.461	555.935	509.21	575.636	240.427	546.927	-1.18654	1.27359e-13	7.07232e-12	-	1	37154448	37157448	+	1671	protein_coding	PF12146:Serine aminopeptidase, S33	-
Os01g0974200	19259	15452.1	17446.6	4606.31	4519.85	7610.68	17385.9	5578.95	1.63975	1.29292e-13	7.16594e-12	-	1	43047164	43047861	+	671	protein_coding	-	-
Os05g0292800	39.9465	41.6856	36.1962	135.818	190.105	294.793	39.2761	206.905	-2.4003	1.3498e-13	7.46694e-12	-	5	12896015	12896822	+	551	protein_coding	-	-
Os01g0734800	260.604	295.866	354.136	86.3252	91.1729	119.963	303.535	99.1537	1.60992	1.37413e-13	7.58705e-12	-	1	30655306	30657083	+	1778	protein_coding	PF00201:UDP-glucoronosyl and UDP-glucosyl transferase	UDPGT
Os06g0265000	1627.35	1695.89	1625.9	791.89	844.804	614.694	1649.71	750.463	1.13697	1.39666e-13	7.69679e-12	-	6	8758936	8765680	-	2264	protein_coding	PF13537:Glutamine amidotransferase domain|PF00733:Asparagine synthase	-
Os11g0251400	4588.15	3654.1	4847.36	9211.48	8672.1	9132.07	4363.2	9005.21	-1.0453	1.44558e-13	7.93616e-12	-	11	8163352	8170110	-	3014	protein_coding	PF12796:Ankyrin repeats (3 copies)	-
novel.132	64.6754	81.3377	63.588	234.805	242.481	182.269	69.867	219.852	-1.65391	1.56187e-13	8.55842e-12	-	1	38840059	38842982	+	1607	-	PF13966:zinc-binding in reverse transcriptase	-
Os03g0103200	26792.7	35027.1	61116.9	8574.97	7174.53	11426.2	40978.9	9058.58	2.1775	1.6072e-13	8.79015e-12	-	3	211082	211817	+	736	protein_coding	PF14547:Hydrophobic seed protein	-
Os04g0359300	163.591	179.96	225.982	37.9831	51.406	61.3764	189.844	50.2552	1.9085	1.68519e-13	9.16486e-12	-	4	17185415	17186524	-	1110	protein_coding	PF00685:Sulfotransferase domain	Sulfotransfer_1
Os01g0803200	4973.35	3349.08	3995.28	10144.9	9478.1	9229.71	4105.9	9617.59	-1.22787	1.80401e-13	9.79265e-12	-	1	34033159	34034924	+	1061	protein_coding	PF16845:Aspartic acid proteinase inhibitor	-
Os08g0499000	409.928	484.976	457.834	210.634	205.624	214.817	450.912	210.358	1.09953	1.98377e-13	1.07411e-11	-	8	24621380	24622828	-	1355	protein_coding	-	-
Os03g0563200	51.3598	35.5853	45.0007	158.838	138.699	152.511	43.9819	150.016	-1.76659	2.02673e-13	1.09402e-11	-	3	20244628	20245176	+	549	protein_coding	-	-
Os07g0572400	329.083	396.521	368.81	148.479	168.767	138.562	364.805	151.936	1.2632	2.1075e-13	1.1355e-11	-	7	23110169	23111254	+	978	protein_coding	-	-
Os01g0803300	3185.26	2436.06	2180.58	7924.66	6846.7	12469.6	2600.64	9080.33	-1.80389	2.24403e-13	1.20236e-11	-	1	34043179	34044975	-	1308	protein_coding	PF00892:EamA-like transporter family	DUF6
Os07g0516700	95.1108	83.3712	71.4142	380.982	218.233	328.271	83.2987	309.162	-1.89017	2.37348e-13	1.26938e-11	-	7	19916969	19917631	+	663	protein_coding	-	-
Os03g0285300	189.271	143.358	129.133	444.287	374.391	428.705	153.92	415.794	-1.43225	2.43237e-13	1.29848e-11	-	3	9832684	9833183	+	500	protein_coding	-	-
Os10g0463100	2.85332	4.06689	5.86966	62.1542	47.5263	80.9053	4.26329	63.5286	-3.90124	2.62424e-13	1.39833e-11	-	10	17063082	17066593	+	1738	protein_coding	PF01406:tRNA synthetases class I (C) catalytic domain	tRNA-synt_1e
Os12g0225900	2052.49	2427.93	3191.14	1043.96	1035.88	961.564	2557.19	1013.8	1.3349	2.85045e-13	1.5133e-11	-	12	6869987	6872291	+	1348	protein_coding	PF00107:Zinc-binding dehydrogenase|PF16884:N-terminal domain of oxidoreductase	ADH_zinc_N
Os01g0615500	491.723	644.601	840.34	234.805	163.917	194.359	658.888	197.694	1.73861	2.91327e-13	1.54382e-11	-	1	24408462	24410310	-	1849	protein_coding	PF01061:ABC-2 type transporter|PF00005:ABC transporter	ABC2_membrane
Os04g0649600	571.616	535.812	780.665	1632.12	1412.21	1606.95	629.364	1550.43	-1.30048	2.94591e-13	1.55827e-11	-	4	33107761	33108336	-	576	protein_coding	-	-
Os07g0469100	27.5821	25.418	48.9138	148.479	138.699	184.129	33.9713	157.103	-2.20945	3.26654e-13	1.72472e-11	-	7	16743570	16745394	+	760	protein_coding	PF14159:CAAD domains of cyanobacterial aminoacyl-tRNA synthetase	-
Os01g0195400	3289.88	4805.03	4204.63	1552.7	1520.84	1897.09	4099.85	1656.88	1.30683	3.28994e-13	1.73392e-11	-	1	5131629	5132915	-	1287	protein_coding	PF03168:Late embryogenesis abundant protein	-
Os02g0538700	5293.87	6908.62	6410.65	2148.92	2715.79	2963.74	6204.38	2609.48	1.24917	3.40577e-13	1.78846e-11	-	2	19954579	19955654	-	1076	protein_coding	PF03168:Late embryogenesis abundant protein	-
Os03g0850400	303.404	341.618	270.004	646.864	821.526	971.793	305.009	813.394	-1.41637	3.42937e-13	1.7976e-11	-	3	35790044	35795425	+	1914	protein_coding	PF00696:Amino acid kinase family	AA_kinase
Os03g0367101	3890.98	5353.04	6001.73	1885.34	1965.07	2204.9	5081.92	2018.44	1.33195	3.55571e-13	1.86046e-11	-	3	14381298	14382935	+	937	protein_coding	PF00067:Cytochrome P450	p450
Os06g0669400	1610.23	1492.55	1745.25	3213.6	3207.54	4198.71	1616.01	3539.95	-1.13144	3.71488e-13	1.94024e-11	-	6	27724577	27728259	-	2465	protein_coding	PF01434:Peptidase family M41|PF00004:ATPase family associated with various cellular activities (AAA)	AAA
Os04g0412100	7.60887	20.3344	19.5655	85.1742	175.556	286.423	15.8363	182.385	-3.53173	3.79818e-13	1.98018e-11	-	4	20358641	20359628	+	988	protein_coding	-	-
Os10g0554900	2906.59	3203.69	3431.8	1008.28	962.165	1522.32	3180.69	1164.26	1.4494	3.84453e-13	2.00074e-11	-	10	21787628	21790244	-	1821	protein_coding	PF04484:QWRF family	-
Os03g0263300	86.5509	78.2876	78.2622	18.4161	13.5789	13.9492	81.0335	15.3147	2.41538	3.97735e-13	2.06615e-11	-	3	8651497	8653224	+	1728	protein_coding	PF03514:GRAS domain family	GRAS
Os01g0881900	1318.24	1037.06	1283.5	2760.11	2519.86	3509.62	1212.93	2929.86	-1.27233	4.08542e-13	2.11507e-11	-	1	38275062	38279030	-	2216	protein_coding	-	-
Os02g0465600	623.927	669.003	829.579	186.463	178.466	294.793	707.503	219.907	1.6836	4.08611e-13	2.11507e-11	-	2	15659380	15660788	-	1409	protein_coding	-	-
Os12g0617800	311.012	207.411	393.267	850.591	1337.53	1532.55	303.897	1240.22	-2.02906	4.12887e-13	2.1334e-11	-	12	26300176	26306140	-	2989	protein_coding	PF02254:TrkA-N domain|PF00999:Sodium/hydrogen exchanger family	Na_H_Exchanger
Os02g0753900	12.3644	8.13377	10.761	73.6642	62.0752	76.2556	10.4197	70.665	-2.75694	4.33909e-13	2.23803e-11	-	2	31706165	31707298	+	864	protein_coding	-	-
Os10g0517050	497.43	336.535	360.984	1720.75	1332.68	980.163	398.316	1344.53	-1.75423	4.41317e-13	2.27219e-11	-	10	19987061	19988358	+	1298	protein_coding	-	-
novel.1475	303.404	328.401	347.288	690.602	646.94	835.091	326.364	724.211	-1.15065	4.67337e-13	2.4019e-11	-	4	23004379	23005406	-	1028	-	-	-
Os02g0299200	383.297	763.558	813.926	165.744	85.3534	135.772	653.594	128.957	2.34364	5.3588e-13	2.74445e-11	-	2	11478306	11483976	+	1605	protein_coding	PF00612:IQ calmodulin-binding motif	IQ
Os07g0103500	10.4622	21.3512	7.82622	90.9293	96.9925	185.989	13.2132	124.637	-3.24597	5.44875e-13	2.78559e-11	-	7	213778	219543	+	1729	protein_coding	PF03171:2OG-Fe(II) oxygenase superfamily|PF14226:non-haem dioxygenase in morphine synthesis N-terminal	2OG-FeII_Oxy
Os04g0460350	3649.4	2882.41	3647.99	1754.13	1693.49	1573.47	3393.27	1673.7	1.01993	5.55488e-13	2.83485e-11	-	4	22980664	22981298	-	635	protein_coding	-	-
Os12g0628600	344.301	217.578	188.807	828.722	1370.5	847.181	250.229	1015.47	-2.02055	5.62823e-13	2.86723e-11	-	12	26913087	26913851	-	765	protein_coding	PF00314:Thaumatin family	Thaumatin
Os10g0191300	16794.7	13259.1	18061.9	41493.7	42854.2	31834.8	16038.6	38727.6	-1.2718	6.06092e-13	3.08224e-11	-	10	6370102	6370799	+	698	protein_coding	PF00188:Cysteine-rich secretory protein family	SCP
Os03g0306800	146.471	157.592	102.719	433.928	527.639	968.074	135.594	643.214	-2.24707	6.8746e-13	3.48991e-11	-	3	10910568	10911189	+	622	protein_coding	PF02672:CP12 domain	-
Os01g0580500	35.191	24.4013	21.5221	107.043	134.82	109.734	27.0381	117.199	-2.11418	7.11539e-13	3.60584e-11	-	1	22489496	22490967	+	1183	protein_coding	PF03171:2OG-Fe(II) oxygenase superfamily|PF14226:non-haem dioxygenase in morphine synthesis N-terminal	2OG-FeII_Oxy
Os03g0707200	316.719	305.016	356.093	123.157	141.609	149.721	325.943	138.163	1.23505	7.84925e-13	3.97079e-11	-	3	28470836	28472865	+	1230	protein_coding	PF00892:EamA-like transporter family	DUF6
Os11g0180900	189.271	185.043	216.199	61.0032	64.015	79.9753	196.838	68.3312	1.52167	9.07857e-13	4.58468e-11	-	11	4049330	4050752	+	1139	protein_coding	PF00249:Myb-like DNA-binding domain	Myb_DNA-binding
Os03g0141200	583.98	613.083	518.487	2142.02	1722.59	1200.56	571.85	1688.39	-1.56148	9.16178e-13	4.61387e-11	-	3	2272966	2276161	+	2063	protein_coding	PF01373:Glycosyl hydrolase family 14	-
Os04g0337500	326.23	390.421	427.507	125.459	128.03	169.25	381.386	140.913	1.4332	9.16821e-13	4.61387e-11	-	4	15888816	15893913	+	1446	protein_coding	PF00248:Aldo/keto reductase family	Aldo_ket_red
Os02g0232500	169.297	134.207	156.524	379.831	325.895	383.138	153.343	362.954	-1.24162	9.38298e-13	4.71377e-11	-	2	7501363	7513592	+	3589	protein_coding	PF11721:Di-glucose binding within endoplasmic reticulum	-
Os01g0806200	1318.24	1175.33	1909.6	491.478	481.083	584.936	1467.72	519.166	1.49894	9.43903e-13	4.73372e-11	-	1	34183076	34186865	-	2452	protein_coding	-	-
Os05g0551100	129.351	105.739	133.046	299.261	287.098	363.609	122.712	316.656	-1.36772	1.04392e-12	5.2083e-11	-	5	27383401	27387244	-	2934	protein_coding	PF14383:DUF761-associated sequence motif	-
Os04g0550900	105.573	122.007	75.3273	469.609	372.451	276.194	100.969	372.751	-1.88332	1.05653e-12	5.26214e-11	-	4	27595492	27596105	-	429	protein_coding	PF00230:Major intrinsic protein	-
Os04g0381700	374.737	578.515	401.094	1510.12	1316.19	1071.3	451.448	1299.2	-1.52506	1.12752e-12	5.6061e-11	-	4	18720467	18722735	+	1397	protein_coding	PF00010:Helix-loop-helix DNA-binding domain	HLH
Os07g0424400	24203.8	29259.2	31874.2	13751	13021.2	15122.8	28445.7	13965	1.02638	1.23843e-12	6.13645e-11	-	7	13741551	13747205	-	4322	protein_coding	PF14569:Zinc-binding RING-finger|PF03552:Cellulose synthase	-
Os07g0674500	240.63	196.227	234.786	555.935	447.135	538.439	223.881	513.836	-1.19728	1.24693e-12	6.16803e-11	-	7	28534263	28535327	+	635	protein_coding	PF01190:Pollen proteins Ole e I like	-
Os06g0234200	302.452	407.705	381.528	136.969	126.09	157.161	363.895	140.073	1.3758	1.35525e-12	6.69245e-11	-	6	6990939	6994527	+	2744	protein_coding	PF00071:Ras family	Ras
Os09g0570900	430.852	330.434	448.051	173.801	148.398	160.881	403.112	161.027	1.32588	1.43131e-12	7.05604e-11	-	9	22793266	22797763	-	3461	protein_coding	-	-
Os06g0594600	203.537	212.495	272.939	52.9461	50.4361	84.6251	229.657	62.6691	1.86794	1.45467e-12	7.15901e-11	AT10	6	23379156	23381421	-	1734	protein_coding	PF02458:Transferase family	-
Os09g0240200	98.9153	104.722	152.611	345.301	422.887	645.382	118.75	471.19	-1.98958	1.48065e-12	7.27451e-11	-	9	3048085	3064471	-	1362	protein_coding	PF00643:B-box zinc finger|PF06203:CCT motif	zf-B_box
novel.431	2862.84	3263.68	2012.32	8637.13	9279.27	6231.57	2712.94	8049.32	-1.569	1.5429e-12	7.56751e-11	-	10	16607720	16626558	-	1460	-	-	-
Os01g0939600	355.714	589.698	451.964	146.177	171.677	149.721	465.792	155.858	1.57817	1.56676e-12	7.67154e-11	-	1	41245588	41249894	+	2079	protein_coding	PF01210:NAD-dependent glycerol-3-phosphate dehydrogenase N-terminus|PF07479:NAD-dependent glycerol-3-phosphate dehydrogenase C-terminus	NAD_Gly3P_dh_N
Os01g0607000	315.768	325.351	498.921	124.308	63.0451	89.2748	380.013	92.2094	2.04821	1.65121e-12	8.04429e-11	-	1	23914150	23914856	+	707	protein_coding	-	-
novel.520	685.749	924.2	889.254	333.791	369.541	258.525	833.068	320.619	1.37818	1.88457e-12	9.12193e-11	-	11	22126085	22127691	+	1066	-	-	-
Os08g0352400	103.671	82.3544	81.197	229.05	221.143	233.416	89.0741	227.87	-1.35381	1.88499e-12	9.12193e-11	-	8	16074341	16077044	-	738	protein_coding	-	-
Os09g0567500	90.3553	139.291	160.437	31.0771	15.5188	23.2486	130.028	23.2815	2.49228	1.92205e-12	9.28576e-11	-	9	22660725	22665351	+	2011	protein_coding	PF03015:Male sterility protein|PF07993:Male sterility protein	Sterile
Os04g0578400	169.297	184.027	183.916	498.384	504.361	921.576	179.08	641.44	-1.84176	1.95373e-12	9.42309e-11	-	4	29157213	29159260	+	1457	protein_coding	PF04116:Fatty acid hydroxylase superfamily	-
Os03g0367150	5229.19	6057.63	6665.98	2798.09	2679.9	3273.41	5984.27	2917.13	1.03647	1.97796e-12	9.52412e-11	-	3	14386783	14387406	-	624	protein_coding	PF00067:Cytochrome P450	p450
Os03g0124000	142.666	175.893	201.525	27.6241	25.218	53.9369	173.361	35.593	2.27452	2.18476e-12	1.05024e-10	-	3	1394429	1400133	+	2574	protein_coding	PF07526:Associated with HOX|PF05920:Homeobox KN domain	POX
Os11g0275200	468.896	355.853	406.963	168.046	161.977	188.779	410.571	172.934	1.24691	2.20293e-12	1.05722e-10	-	11	9754959	9759732	+	894	protein_coding	PF01738:Dienelactone hydrolase family	-
Os06g0228500	409.928	449.391	436.312	179.557	113.481	178.55	431.877	157.196	1.45976	2.25515e-12	1.0805e-10	-	6	6678245	6680823	+	1433	protein_coding	PF01490:Transmembrane amino acid transporter protein	Aa_trans
Os09g0388550	47.5554	37.6187	40.1094	184.161	121.241	153.441	41.7612	152.947	-1.86866	2.29212e-12	1.09459e-10	-	9	13322903	13324760	-	444	protein_coding	-	-
Os02g0525100	390.905	287.732	329.679	901.236	719.684	744.887	336.106	788.602	-1.22896	2.30192e-12	1.09746e-10	-	2	19186328	19187080	-	753	protein_coding	-	-
Os08g0512500	46.6043	52.8695	58.6966	155.385	159.068	223.187	52.7235	179.213	-1.76803	2.40407e-12	1.14428e-10	-	8	25416182	25418653	+	1037	protein_coding	PF01789:PsbP	-
Os01g0588100	2766.77	3406.02	3580.49	13598	10948.5	6902.06	3251.09	10482.8	-1.68898	2.52766e-12	1.20113e-10	-	1	22906348	22907811	+	959	protein_coding	PF01145:SPFH domain / Band 7 family	-
Os02g0620500	132.204	45.7525	86.0884	6.90602	1.93985	7.43957	88.015	5.42848	4.02874	2.54568e-12	1.20772e-10	-	2	24683709	24685205	+	1497	protein_coding	PF00909:Ammonium Transporter Family	Ammonium_transp
Os08g0545700	25.6799	13.2174	36.1962	116.251	134.82	185.989	25.0312	145.687	-2.53984	2.58883e-12	1.22618e-10	-	8	27329441	27331356	+	1242	protein_coding	PF01963:TraB family	-
Os05g0410900	208.293	234.863	348.267	817.212	678.947	993.182	263.807	829.781	-1.65347	2.65753e-12	1.25667e-10	-	5	20087194	20091534	-	2208	protein_coding	PF00854:POT family	-
Os03g0806800	3076.84	2816.32	3317.34	1622.91	1546.06	1220.09	3070.16	1463.02	1.0699	2.87037e-12	1.35511e-10	-	3	33716907	33717725	+	649	protein_coding	-	-
Os10g0453900	150.275	291.799	150.655	1384.66	1015.51	617.484	197.576	1005.88	-2.3482	3.00174e-12	1.41482e-10	-	10	16581609	16582365	-	757	protein_coding	-	-
Os08g0511400	882.628	1403.08	1171.98	447.74	482.052	411.966	1152.56	447.253	1.36558	3.05033e-12	1.43074e-10	-	8	25366387	25367226	-	840	protein_coding	-	-
Os02g0666200	36619.6	40360.8	39680.9	108530	80398	74333.4	38887.1	87753.9	-1.17416	3.08199e-12	1.44326e-10	-	2	27044341	27047381	+	1204	protein_coding	PF00230:Major intrinsic protein	-
Os01g0600900	491.723	825.578	483.269	1641.33	3071.75	4349.36	600.19	3020.81	-2.33184	3.28551e-12	1.53608e-10	-	1	23607363	23608541	+	1179	protein_coding	PF00504:Chlorophyll A-B binding protein	-
Os06g0336200	12393.9	17436.8	17436.8	42777	38304.3	32503.5	15755.8	37861.6	-1.26485	3.37682e-12	1.57623e-10	-	6	13407319	13408715	+	1214	protein_coding	PF00230:Major intrinsic protein	-
Os04g0403701	3416.38	2228.65	2762.65	6901.42	6631.37	9522.65	2802.56	7685.14	-1.45531	3.38575e-12	1.57786e-10	-	4	20021226	20025141	-	2619	protein_coding	PF00481:Protein phosphatase 2C	PP2C
Os03g0750700	1770.01	2124.95	1910.57	947.276	1082.44	862.06	1935.18	963.924	1.00541	3.41848e-12	1.59055e-10	-	3	30927374	30929678	-	1568	protein_coding	PF03088:Strictosidine synthase	Str_synth
novel.1151	95.1108	91.5049	66.5228	256.674	258.97	209.238	84.3795	241.627	-1.51669	3.43537e-12	1.59585e-10	-	3	28954253	28956015	+	1012	-	-	-
Os02g0182850	789.42	589.698	813.926	237.107	266.729	332.921	731.015	278.919	1.38828	3.51611e-12	1.63074e-10	-	2	4629617	4630180	-	564	protein_coding	-	-
Os04g0506300	199.733	193.177	264.135	75.9662	80.5037	71.6058	219.015	76.0253	1.527	3.52353e-12	1.63158e-10	-	4	25280935	25285098	-	1550	protein_coding	PF03348:Serine incorporator (Serinc)	TMS_TDE
Os05g0482501	141.715	151.491	160.437	55.2482	50.4361	53.0069	151.215	52.897	1.51684	3.6595e-12	1.69183e-10	-	5	23739115	23739799	+	685	protein_coding	PF03168:Late embryogenesis abundant protein	-
Os12g0605800	123.644	144.374	145.763	363.717	291.947	320.831	137.927	325.499	-1.23786	3.70785e-12	1.71146e-10	-	12	25576492	25581974	+	2780	protein_coding	PF02785:Biotin carboxylase C-terminal domain|PF00364:Biotin-requiring enzyme|PF02786:Carbamoyl-phosphate synthase L chain, ATP binding domain	Biotin_carb_C
Os05g0307100	248.239	283.665	279.787	97.8353	100.872	126.473	270.564	108.393	1.31567	3.74876e-12	1.72759e-10	-	5	13927674	13929113	+	863	protein_coding	-	-
Os03g0116300	1730.07	2048.69	2767.55	821.816	868.082	913.207	2182.1	867.702	1.33018	3.75916e-12	1.72963e-10	-	3	922684	928190	+	1444	protein_coding	PF00561:alpha/beta hydrolase fold	Abhydrolase_1
Os11g0644800	84.6486	170.809	196.634	595.069	546.068	880.659	150.697	673.932	-2.16206	3.77356e-12	1.7335e-10	-	11	25596663	25608463	-	1407	protein_coding	PF00155:Aminotransferase class I and II	Aminotran_1_2
Os05g0153000	890.237	1192.61	1106.43	378.68	411.248	519.84	1063.09	436.589	1.28238	3.85877e-12	1.76984e-10	-	5	3050934	3056996	+	3072	protein_coding	PF00626:Gelsolin repeat	-
Os08g0492000	589.687	639.518	630.989	330.338	271.579	237.136	620.065	279.684	1.1517	3.95361e-12	1.81048e-10	-	8	24311145	24314816	+	2504	protein_coding	PF03169:OPT oligopeptide transporter protein	OPT
Os01g0124401	3098.71	2860.04	2821.35	9499.23	14386.9	6476.14	2926.7	10120.8	-1.78996	3.96997e-12	1.8151e-10	-	1	1353705	1354767	-	1063	protein_coding	PF00228:Bowman-Birk serine protease inhibitor family	-
Os03g0332100	157.884	160.642	180.981	48.3421	31.0376	58.5866	166.502	45.9888	1.85574	4.02461e-12	1.83719e-10	-	3	12235398	12249872	-	1763	protein_coding	PF00067:Cytochrome P450	p450
novel.2225	104.622	64.0535	66.5228	217.54	302.616	281.774	78.3994	267.31	-1.76918	4.19466e-12	1.9118e-10	-	8	15749432	15750942	-	989	-	-	-
Os03g0254200	75.1376	110.823	111.524	24.1711	19.3985	13.9492	99.1613	19.1729	2.38335	4.25611e-12	1.93373e-10	-	3	8130378	8132030	+	597	protein_coding	PF03222:Tryptophan/tyrosine permease family	-
Os03g0316200	2462.42	2366.93	2853.63	1000.22	973.804	1360.51	2560.99	1111.51	1.20366	4.27378e-12	1.93872e-10	-	3	11367200	11368889	+	1402	protein_coding	PF01501:Glycosyl transferase family 8	Glyco_transf_8
Os02g0591000	21.8755	31.5184	19.5655	122.006	106.692	90.2047	24.3198	106.301	-2.12847	4.30731e-12	1.95088e-10	-	2	22836027	22838425	+	2201	protein_coding	-	-
Os08g0469600	131.253	64.0535	75.3273	353.358	294.857	374.768	90.2112	340.994	-1.91618	4.32572e-12	1.95616e-10	-	8	23080414	23081034	-	621	protein_coding	-	-
Os01g0720500	66.5776	91.5049	56.7401	201.426	462.654	572.847	71.6075	412.309	-2.52776	4.54301e-12	2.05122e-10	-	1	30030998	30032054	+	1057	protein_coding	PF00504:Chlorophyll A-B binding protein	-
Os05g0408900	684.798	642.568	738.599	1494	1495.62	2238.38	688.655	1742.67	-1.33977	4.75091e-12	2.14175e-10	-	5	19957171	19963120	-	2980	protein_coding	PF13292:1-deoxy-D-xylulose-5-phosphate synthase	-
Os09g0517200	136.008	190.127	114.458	372.925	494.662	436.145	146.865	434.577	-1.56704	5.5234e-12	2.4746e-10	-	9	20163094	20167803	-	2919	protein_coding	PF00931:NB-ARC domain	NB-ARC
Os10g0140700	889.286	801.177	889.254	1996.99	2083.4	1511.16	859.905	1863.85	-1.11565	5.62543e-12	2.51643e-10	-	10	2507002	2508368	+	1361	protein_coding	-	-
Os10g0486100	3259.45	3370.43	5260.2	1386.96	1400.57	1619.04	3963.36	1468.86	1.43189	5.70853e-12	2.54574e-10	-	10	18390302	18394392	-	2089	protein_coding	PF00067:Cytochrome P450	p450
Os05g0159300	1530.33	2161.55	1917.42	732.038	742.962	922.506	1869.77	799.169	1.22561	6.09687e-12	2.71058e-10	-	5	3499107	3500826	-	1320	protein_coding	-	-
Os04g0692600	347.155	292.816	279.787	658.374	691.556	935.526	306.586	761.819	-1.31369	6.25672e-12	2.77739e-10	-	4	35443929	35445567	+	1123	protein_coding	PF12638:Staygreen protein	-
Os10g0555900	2315.95	3453.8	3248.86	1086.55	1315.22	1321.45	3006.2	1241.07	1.27589	6.44333e-12	2.85586e-10	-	10	21847828	21849722	-	1311	protein_coding	PF01357:Pollen allergen	-
Os02g0532800	550.692	667.986	736.643	1439.91	1321.04	1783.64	651.773	1514.86	-1.21714	7.26518e-12	3.2103e-10	-	2	19614070	19615072	+	1003	protein_coding	-	-
Os09g0246300	7.60887	6.10033	9.78277	132.365	102.812	42.7775	7.83065	92.6516	-3.55902	7.37702e-12	3.24981e-10	-	9	3480171	3496480	-	1087	protein_coding	-	-
Os02g0586000	142.666	76.2541	49.8921	593.918	333.654	686.3	89.6042	537.957	-2.58469	7.46552e-12	3.28381e-10	-	2	22579161	22580613	-	689	protein_coding	-	-
Os02g0612900	93.2086	122.007	128.154	361.415	453.925	958.774	114.456	591.371	-2.37055	7.51294e-12	3.29966e-10	-	2	24152119	24153073	-	955	protein_coding	PF08212:Lipocalin-like domain	Lipocalin_2
EPlOSAG00000019088	297.697	263.331	217.177	56.3992	44.6165	93.9245	259.402	64.9801	1.99264	7.59297e-12	3.32977e-10	-	11	28974695	28974744	-	50	ncRNA	-	-
Os04g0367000	56.1154	54.903	43.0442	1.151	2.90977	4.64973	51.3542	2.9035	4.09624	7.73545e-12	3.38712e-10	-	4	17761013	17766782	-	5770	protein_coding	PF07727:Reverse transcriptase (RNA-dependent DNA polymerase)	RVT_2
Os06g0218300	597.296	640.535	752.295	323.432	333.654	325.481	663.375	327.522	1.01799	7.85163e-12	3.42764e-10	-	6	6058841	6060541	-	1701	protein_coding	PF13639:Ring finger domain	-
Os06g0199000	30.4355	43.719	39.1311	128.912	169.737	119.033	37.7619	139.227	-1.88525	8.20241e-12	3.57539e-10	-	6	5023093	5024199	+	1107	protein_coding	-	-
Os10g0438600	113.182	129.124	200.547	31.0771	14.5489	32.5481	147.617	26.058	2.50584	8.23192e-12	3.58286e-10	-	10	15734082	15736908	-	1504	protein_coding	PF00657:GDSL-like Lipase/Acylhydrolase	Lipase_GDSL
Os03g0650200	11.4133	13.2174	7.82622	51.7951	96.0225	125.543	10.819	91.1201	-3.08041	8.54735e-12	3.71457e-10	-	3	25219722	25221556	-	1767	protein_coding	PF00067:Cytochrome P450	p450
Os09g0549450	3363.12	2763.45	2947.55	1357.03	1182.34	1640.42	3024.71	1393.27	1.11817	8.76174e-12	3.80204e-10	-	9	21735447	21740544	+	3328	protein_coding	PF02042:RWP-RK domain|PF00564:PB1 domain	RWP-RK
Os03g0734000	19.0222	17.2843	16.6307	73.6642	87.2932	78.1155	17.6457	79.691	-2.17572	8.84787e-12	3.83368e-10	-	3	30071523	30072291	+	659	protein_coding	-	-
Os08g0360300	134.106	143.358	101.741	284.298	334.624	340.36	126.402	319.761	-1.34074	8.89259e-12	3.84731e-10	-	8	16593210	16596198	+	1516	protein_coding	PF07887:Calmodulin binding protein-like	-
Os05g0164100	430.852	380.254	404.028	787.286	778.849	999.692	405.045	855.276	-1.07873	9.77676e-12	4.21725e-10	-	5	3763113	3771453	+	2656	protein_coding	PF01591:6-phosphofructo-2-kinase|PF00300:Histidine phosphatase superfamily (branch 1)	-
Os09g0420300	1113.75	1348.17	1573.07	550.18	523.759	663.051	1345	578.997	1.21538	1.02806e-11	4.42144e-10	-	9	15135243	15139321	-	1648	protein_coding	PF03352:Methyladenine glycosylase	-
Os02g0569400	25.6799	10.1672	14.6742	94.3823	94.0827	175.76	16.8404	121.408	-2.84659	1.0827e-11	4.64262e-10	-	2	21690378	21692185	+	1808	protein_coding	PF00067:Cytochrome P450	p450
Os10g0167250	163.591	96.5885	121.306	416.663	353.053	610.974	127.162	460.23	-1.85517	1.11575e-11	4.77728e-10	-	10	4635054	4636133	+	1080	protein_coding	PF00067:Cytochrome P450	p450
Os10g0528300	192.124	152.508	224.025	56.3992	67.8947	44.6374	189.553	56.3104	1.753	1.23726e-11	5.28195e-10	-	10	20556396	20557613	+	990	protein_coding	PF13417:Glutathione S-transferase, N-terminal domain|PF13410:Glutathione S-transferase, C-terminal domain	-
Os01g0772500	536.425	765.591	566.422	218.691	190.105	275.264	622.813	228.02	1.44836	1.24015e-11	5.2865e-10	-	1	32611416	32613138	-	1550	protein_coding	PF02485:Core-2/I-Branching enzyme	-
Os11g0614800	327.181	333.485	351.201	169.197	162.947	137.632	337.289	156.592	1.10974	1.32127e-11	5.62402e-10	-	11	23866045	23867666	+	1214	protein_coding	PF02234:Cyclin-dependent kinase inhibitor	-
Os01g0740600	105.573	94.5551	115.437	33.3791	20.3684	26.9684	105.188	26.9053	1.97729	1.33993e-11	5.69511e-10	-	1	30933396	30933963	-	468	protein_coding	-	-
Os12g0576600	49.4576	54.903	77.2839	6.90602	5.81955	8.36951	60.5482	7.03169	3.10243	1.36554e-11	5.78696e-10	-	12	23805152	23808859	-	2311	protein_coding	PF00149:Calcineurin-like phosphoesterase|PF16656:Purple acid Phosphatase, N-terminal domain|PF14008:Iron/zinc purple acid phosphatase-like protein C	Metallophos
Os03g0373500	42.7999	29.4849	36.1962	140.422	106.692	155.301	36.1603	134.138	-1.88867	1.44939e-11	6.13337e-10	-	3	14701314	14705044	+	1029	protein_coding	-	-
Os07g0582500	258.701	268.414	396.202	85.1742	86.3233	117.173	307.773	96.2236	1.67438	1.50891e-11	6.37592e-10	-	7	23584701	23586462	-	1620	protein_coding	PF00083:Sugar (and other) transporter	Sugar_tr
Os01g0896500	111.28	114.89	94.8929	258.976	366.631	524.489	107.021	383.366	-1.84278	1.56266e-11	6.58383e-10	-	1	38961459	38966130	-	2188	protein_coding	PF00581:Rhodanese-like domain	Rhodanese
Os05g0384600	779.909	794.059	1185.67	380.982	351.113	355.239	919.88	362.445	1.34415	1.62129e-11	6.82093e-10	-	5	18575668	18578864	-	3031	protein_coding	PF00005:ABC transporter|PF01061:ABC-2 type transporter	ABC_tran
Os06g0667100	438.461	404.655	441.203	181.859	225.992	211.098	428.106	206.316	1.0506	1.62392e-11	6.82213e-10	-	6	27627768	27633037	+	1418	protein_coding	PF00808:Histone-like transcription factor (CBF/NF-Y) and archaeal histone	-
Os05g0359700	204.488	168.776	209.351	580.106	429.677	428.705	194.205	479.496	-1.30172	1.66089e-11	6.96734e-10	-	5	17135217	17135756	+	540	protein_coding	-	-
Os04g0518100	12272.1	17155.1	15279.7	5572.01	5889.38	7607.89	14902.3	6356.43	1.22914	1.71223e-11	7.17229e-10	-	4	25906878	25910059	-	2509	protein_coding	PF00221:Aromatic amino acid lyase	-
Os09g0355400	159.786	195.211	240.656	57.5502	60.1353	72.5358	198.551	63.4071	1.64302	1.72735e-11	7.2148e-10	-	9	11387149	11396236	+	4305	protein_coding	PF07714:Protein tyrosine kinase	Pkinase_Tyr
Os11g0105750	65.6265	46.7692	89.0232	209.483	244.421	355.239	67.1396	269.714	-2.00667	1.86255e-11	7.7683e-10	-	11	256918	262015	-	3157	protein_coding	-	-
Os11g0182200	127.449	102.689	105.654	293.506	241.511	273.404	111.93	269.474	-1.2653	1.96245e-11	8.17321e-10	-	11	4128533	4130570	-	1491	protein_coding	PF02458:Transferase family	-
Os03g0687000	7120	9963.87	10937.1	4265.62	3940.8	4101.06	9340.33	4102.49	1.18699	2.04177e-11	8.49136e-10	-	3	27413550	27418774	-	2117	protein_coding	PF00854:POT family	-
Os03g0131200	101.769	69.1371	91.958	232.503	315.225	467.763	87.6212	338.497	-1.95053	2.14224e-11	8.89644e-10	-	3	1787679	1790806	-	1944	protein_coding	PF06628:Catalase-related immune-responsive|PF00199:Catalase	Catalase
Os05g0353500	804.638	1058.41	1045.78	437.381	330.744	453.814	969.608	407.313	1.25149	2.42724e-11	1.00656e-09	-	5	16702120	16704232	-	1639	protein_coding	PF07714:Protein tyrosine kinase	Pkinase_Tyr
Os10g0109300	9700.35	12422.3	9004.06	20164.4	22543	20923.8	10375.6	21210.4	-1.03162	2.43803e-11	1.00866e-09	-	10	655625	658866	-	1447	protein_coding	PF00141:Peroxidase	-
Os03g0782400	323.377	669.003	656.424	95.5333	149.368	151.581	549.601	132.161	2.05298	2.43927e-11	1.00866e-09	-	3	32428081	32428566	+	486	protein_coding	-	-
Os04g0345800	119.84	82.3544	140.872	361.415	327.834	294.793	114.355	328.014	-1.51802	2.49485e-11	1.02871e-09	-	4	16442063	16445999	+	813	protein_coding	PF03079:ARD/ARD' family	-
Os12g0459100	0.951108	6.10033	1.95655	44.8891	50.4361	52.077	3.00266	49.1341	-4.05642	2.50618e-11	1.03191e-09	-	12	16079745	16082151	-	1467	protein_coding	PF02458:Transferase family	-
Os04g0470700	853.144	944.534	1307.96	387.888	457.804	411.036	1035.21	418.91	1.30468	2.51012e-11	1.03207e-09	-	4	23512858	23522971	-	1808	protein_coding	PF01490:Transmembrane amino acid transporter protein	Aa_trans
Os09g0307300	834.122	1236.33	1012.52	295.808	300.677	462.183	1027.66	352.889	1.54047	2.51391e-11	1.03216e-09	-	9	7964048	7967912	+	1824	protein_coding	-	-
novel.1030	25.6799	19.3177	42.0659	135.818	107.662	159.951	29.0212	134.477	-2.21079	2.55032e-11	1.04563e-09	-	2	28753138	28754784	-	1647	-	-	-
Os01g0281100	655.314	503.277	571.314	1297.18	1071.77	1420.96	576.635	1263.3	-1.13113	2.66126e-11	1.08958e-09	-	1	10008075	10011595	-	1650	protein_coding	-	-
Os05g0499400	597.296	659.852	686.75	276.241	315.225	356.169	647.966	315.879	1.03412	2.7107e-11	1.10825e-09	-	5	24587145	24588976	+	1548	protein_coding	PF00141:Peroxidase	-
Os02g0578366	303.404	213.512	255.33	82.8722	63.0451	102.294	257.415	82.7371	1.63688	2.8148e-11	1.14919e-09	-	2	22233461	22234247	+	606	protein_coding	PF04535:Domain of unknown function (DUF588)	-
Os08g0392100	235.875	222.662	223.047	446.589	431.616	537.509	227.195	471.905	-1.05528	3.08997e-11	1.25976e-09	-	8	18568971	18570352	-	1382	protein_coding	PF14226:non-haem dioxygenase in morphine synthesis N-terminal|PF03171:2OG-Fe(II) oxygenase superfamily	2OG-FeII_Oxy
Os03g0206400	707.625	741.19	859.905	421.267	332.684	332.921	769.573	362.291	1.08903	3.1283e-11	1.2736e-09	-	3	5582059	5582713	-	655	protein_coding	-	-
Os08g0548400	499.332	610.033	813.926	203.728	201.744	269.684	641.097	225.052	1.50882	3.22339e-11	1.31047e-09	-	8	27507734	27508477	+	744	protein_coding	PF00226:DnaJ domain	DnaJ
novel.365	70.382	53.8862	48.9138	193.369	148.398	215.747	57.7274	185.838	-1.68531	3.25165e-11	1.32011e-09	-	10	21599994	21602730	+	2737	-	-	-
novel.2090	113.182	160.642	270.983	29.9261	25.218	41.8476	181.602	32.3306	2.48635	3.26452e-11	1.32348e-09	-	8	4226158	4228319	+	1247	-	-	-
Os01g0638600	767.544	579.531	656.424	156.536	174.586	292.933	667.833	208.019	1.67999	3.30218e-11	1.33688e-09	-	1	25615791	25617367	+	1577	protein_coding	PF00201:UDP-glucoronosyl and UDP-glucosyl transferase	UDPGT
Os02g0629200	4156.34	3781.19	3662.67	9282.84	7277.34	6879.74	3866.73	7813.31	-1.01466	3.35335e-11	1.3557e-09	-	2	25162876	25166544	+	1260	protein_coding	PF00230:Major intrinsic protein	-
Os06g0554800	6726.24	6562.94	8366.22	2758.95	3035.86	3869.5	7218.47	3221.44	1.16376	3.47614e-11	1.40143e-09	-	6	21113234	21120648	-	4315	protein_coding	PF01061:ABC-2 type transporter	ABC2_membrane
Os01g0172100	186.417	159.625	151.633	366.019	332.684	356.169	165.892	351.624	-1.0826	3.57436e-11	1.43903e-09	-	1	3711212	3713653	+	1652	protein_coding	PF03151:Triose-phosphate Transporter family	-
Os01g0842500	1900.31	3397.88	3111.9	1000.22	856.443	1098.27	2803.37	984.977	1.5089	3.66265e-11	1.47253e-09	-	1	36177292	36180127	-	2210	protein_coding	PF00394:Multicopper oxidase|PF07732:Multicopper oxidase|PF07731:Multicopper oxidase	-
Os03g0367200	722.842	894.715	855.014	407.455	378.271	449.164	824.19	411.63	1.00101	3.68933e-11	1.47915e-09	-	3	14387290	14387596	+	307	protein_coding	-	-
Os03g0364700	177.857	169.792	143.807	339.546	340.444	349.66	163.819	343.216	-1.0671	3.82181e-11	1.53015e-09	-	3	14233207	14236034	+	2040	protein_coding	PF08711:TFIIS helical bundle-like domain	-
Os09g0437500	1986.87	1357.32	2353.73	733.189	619.782	766.275	1899.31	706.415	1.42705	3.98976e-11	1.59519e-09	-	9	16153181	16155032	+	1176	protein_coding	PF05564:Dormancy/auxin associated protein	-
Os09g0560600	444.168	417.873	569.357	203.728	189.135	224.117	477.132	205.66	1.21377	4.07803e-11	1.62823e-09	-	9	22275274	22277863	+	1441	protein_coding	PF03381:LEM3 (ligand-effect modulator 3) family / CDC50 family	-
Os03g0426350	7.60887	4.06689	18.5873	73.6642	87.2932	77.1855	10.0877	79.381	-2.97291	4.08413e-11	1.62843e-09	-	3	17809791	17810736	+	946	protein_coding	-	-
Os10g0463200	0.951108	1.01672	0.978277	79.4192	47.5263	60.4465	0.982036	62.464	-5.98833	4.23596e-11	1.68664e-09	-	10	17070925	17072455	+	1374	protein_coding	PF00657:GDSL-like Lipase/Acylhydrolase	Lipase_GDSL
Os03g0692000	420.39	507.344	446.094	86.3252	183.316	148.791	457.943	139.477	1.71025	4.8789e-11	1.93467e-09	-	3	27678315	27681645	+	1497	protein_coding	PF02485:Core-2/I-Branching enzyme	-
Os07g0677600	814.149	1006.55	1522.2	379.831	194.955	309.672	1114.3	294.819	1.91951	5.28744e-11	2.09244e-09	-	7	28690629	28692640	-	1227	protein_coding	PF00141:Peroxidase	-
Os03g0117100	206.39	189.11	173.155	468.458	527.639	923.436	189.552	639.844	-1.756	5.65722e-11	2.23414e-09	-	3	958129	960101	-	1100	protein_coding	PF05648:Peroxisomal biogenesis factor 11 (PEX11)	-
Os06g0694800	38.0443	20.3344	42.0659	133.516	142.579	264.105	33.4816	180.067	-2.42667	5.85461e-11	2.30895e-09	-	6	29002279	29003541	-	787	protein_coding	PF07466:Protein of unknown function (DUF1517)	-
Os05g0489900	1064.29	994.354	1421.44	552.482	488.842	527.279	1160.03	522.868	1.1501	5.87046e-11	2.31006e-09	-	5	24071191	24075089	-	1967	protein_coding	PF00069:Protein kinase domain|PF13499:EF-hand domain pair	Pkinase
Os03g0684700	274.87	154.542	210.33	631.901	531.519	798.823	213.247	654.081	-1.61629	6.14785e-11	2.41474e-09	-	3	27300727	27302989	-	1149	protein_coding	PF04982:HPP family	-
Os06g0218600	4824.02	7306.16	6087.82	2219.13	2045.57	2942.35	6072.67	2402.35	1.3377	6.36586e-11	2.49698e-09	-	6	6086859	6088128	+	886	protein_coding	PF02298:Plastocyanin-like domain	Cu_bind_like
Os05g0355900	210.195	298.916	407.941	96.6843	42.6767	55.7968	305.684	65.0526	2.23979	6.50566e-11	2.54493e-09	-	5	16874881	16876813	+	818	protein_coding	-	-
Os04g0650416	275.821	297.899	280.765	146.177	112.511	126.473	284.829	128.387	1.15318	6.869e-11	2.68345e-09	-	4	33146316	33146778	+	463	protein_coding	-	-
Os01g0860800	1521.77	1896.19	1962.42	774.625	883.601	968.074	1793.46	875.433	1.03384	7.06846e-11	2.75765e-09	-	1	37269811	37274701	+	4162	protein_coding	PF00332:Glycosyl hydrolases family 17	Glyco_hydro_17
Os10g0163310	31.3866	24.4013	22.5004	81.7212	115.421	141.352	26.0961	112.831	-2.11473	7.14535e-11	2.7839e-09	-	10	4338836	4340390	-	1555	protein_coding	PF02450:Lecithin:cholesterol acyltransferase	-
Os12g0628100	381.394	610.033	479.356	208.332	147.429	168.32	490.261	174.693	1.4908	7.2346e-11	2.81489e-09	-	12	26888810	26890166	-	698	protein_coding	PF00241:Cofilin/tropomyosin-type actin-binding protein	Cofilin_ADF
Os03g0856700	667.678	479.893	593.814	216.389	231.812	284.563	580.462	244.255	1.24724	7.69728e-11	2.9869e-09	-	3	36150664	36152355	+	1692	protein_coding	PF14226:non-haem dioxygenase in morphine synthesis N-terminal|PF03171:2OG-Fe(II) oxygenase superfamily	2OG-FeII_Oxy
Os07g0577500	452.728	484.976	473.486	201.426	173.616	252.015	470.397	209.019	1.16875	7.89629e-11	3.06002e-09	-	7	23353071	23354778	+	1708	protein_coding	-	-
Os04g0474700	98.9153	130.14	148.698	35.6811	39.7669	30.6882	125.918	35.3787	1.83237	7.95618e-11	3.07912e-09	-	4	23735317	23742375	-	1920	protein_coding	PF00232:Glycosyl hydrolase family 1	Glyco_hydro_1
Os08g0344600	749.473	984.186	935.233	378.68	452.955	442.654	889.631	424.763	1.06511	8.15511e-11	3.1519e-09	-	8	15592259	15599090	+	1591	protein_coding	PF03151:Triose-phosphate Transporter family	-
Os08g0101500	1116.6	814.394	994.908	2363.01	2004.83	1870.12	975.301	2079.32	-1.09162	8.25525e-11	3.18635e-09	-	8	86388	87854	+	1467	protein_coding	PF16983:Molybdate transporter of MFS superfamily	-
Os02g0208500	283.43	316.2	378.593	134.667	96.9925	140.422	326.075	124.027	1.39549	8.94792e-11	3.43411e-09	-	2	6078179	6079111	-	673	protein_coding	-	-
Os09g0376800	2011.59	1424.43	1896.88	3542.79	3577.08	4091.76	1777.63	3737.21	-1.07194	9.27463e-11	3.54391e-09	-	9	12646004	12650074	-	1832	protein_coding	PF00982:Glycosyltransferase family 20	-
Os07g0599500	873.117	1836.2	1352.96	287.751	275.459	481.712	1354.09	348.307	1.9578	9.27942e-11	3.54391e-09	-	7	24470110	24471114	-	1005	protein_coding	-	-
Os05g0159500	1189.84	1972.44	1663.07	618.089	576.135	712.339	1608.45	635.521	1.33927	9.35043e-11	3.55697e-09	-	5	3506732	3507407	-	504	protein_coding	-	-
Os05g0382200	175.955	111.839	121.306	23.0201	23.2782	42.7775	136.367	29.6919	2.19042	9.38247e-11	3.56448e-09	-	5	18475523	18479481	-	1363	protein_coding	PF00999:Sodium/hydrogen exchanger family	Na_H_Exchanger
Os06g0132550	118.889	130.14	221.091	44.8891	27.1579	24.1786	156.706	32.0752	2.30033	9.51671e-11	3.61075e-09	-	6	1740585	1741739	-	519	protein_coding	PF00561:alpha/beta hydrolase fold	Abhydrolase_1
Os03g0386800	33.2888	51.8528	41.0876	136.969	136.759	225.047	42.0764	166.259	-1.98677	9.56753e-11	3.62528e-09	-	3	15400468	15403844	+	1767	protein_coding	PF00450:Serine carboxypeptidase	Peptidase_S10
Os04g0433300	184.515	200.294	171.198	72.5132	64.015	81.8352	185.336	72.7878	1.34697	9.68323e-11	3.65955e-09	-	4	21525319	21526256	+	879	protein_coding	-	-
Os12g0263600	468.896	519.545	667.185	117.402	178.466	226.907	551.875	174.258	1.65915	1.04916e-10	3.95475e-09	-	12	9286790	9291494	-	1083	protein_coding	PF05368:NmrA-like family	NmrA
novel.1698	56.1154	46.7692	62.6097	142.724	152.278	155.301	55.1648	150.101	-1.44387	1.05782e-10	3.98222e-09	-	6	5095681	5097986	+	2306	-	-	-
Os07g0687100	164.542	139.291	165.329	52.9461	29.0977	53.9369	156.387	45.3269	1.79066	1.06685e-10	4.011e-09	-	7	29195074	29197462	-	1103	protein_coding	PF03959:Serine hydrolase (FSH1)	-
Os03g0250200	779.909	987.237	924.472	493.78	421.917	391.507	897.206	435.735	1.04336	1.08413e-10	4.0707e-09	-	3	7929012	7933985	-	3717	protein_coding	PF03134:TB2/DP1, HVA22 family	TB2_DP1_HVA22
Os04g0308600	0.951108	3.05016	0.978277	187.614	631.421	79.0454	1.65985	299.36	-7.50479	1.10141e-10	4.12486e-09	-	4	13949076	13950288	-	1100	protein_coding	-	-
Os09g0403300	1042.41	1066.54	915.667	1941.74	1773.02	2382.52	1008.21	2032.43	-1.01165	1.14075e-10	4.2667e-09	-	9	14194229	14196610	-	1751	protein_coding	PF00067:Cytochrome P450	p450
Os01g0228400	16.1688	26.4348	14.6742	73.6642	101.842	153.441	19.0926	109.649	-2.52906	1.15831e-10	4.3268e-09	-	1	7092034	7095315	+	2449	protein_coding	PF13041:PPR repeat family	-
Os06g0304600	1096.63	1574.9	1599.48	591.616	635.301	673.281	1423.67	633.399	1.16783	1.17532e-10	4.37907e-09	-	6	11486965	11494270	-	1912	protein_coding	PF14543:Xylanase inhibitor N-terminal|PF14541:Xylanase inhibitor C-terminal	-
novel.1025	63.7243	44.7357	63.588	171.499	152.278	225.977	57.3493	183.251	-1.6755	1.18042e-10	4.39239e-09	-	2	27957796	27959618	-	1823	-	-	-
Os01g0177400	14.2666	18.301	7.82622	75.9662	62.0752	92.9946	13.4646	77.012	-2.5198	1.20216e-10	4.46757e-09	-	1	4003659	4004887	-	1113	protein_coding	PF14226:non-haem dioxygenase in morphine synthesis N-terminal|PF03171:2OG-Fe(II) oxygenase superfamily	2OG-FeII_Oxy
Os04g0635100	424.194	452.441	697.511	186.463	196.895	194.359	524.716	192.572	1.44574	1.22891e-10	4.56112e-09	-	4	32301933	32302446	-	514	protein_coding	PF12609:Wound-induced protein	-
Os06g0307900	34.2399	33.5518	23.4786	97.8353	105.722	144.142	30.4235	115.9	-1.93264	1.26829e-10	4.69616e-09	-	6	11669579	11673430	-	2989	protein_coding	PF07762:Protein of unknown function (DUF1618)	-
Os10g0490900	93.2086	70.1538	74.349	185.312	198.835	223.187	79.2371	202.444	-1.35333	1.27015e-10	4.69616e-09	-	10	18637489	18638521	-	1013	protein_coding	PF04450:Peptidase of plants and bacteria	-
Os10g0185400	38.0443	47.7859	36.1962	119.704	131.91	116.243	40.6755	122.619	-1.59408	1.28761e-10	4.75466e-09	-	10	5866542	5867333	-	792	protein_coding	PF04043:Plant invertase/pectin methylesterase inhibitor	-
Os01g0645000	1613.08	2626.19	2359.6	885.121	863.233	984.813	2199.63	911.056	1.27138	1.29438e-10	4.77356e-09	-	1	25959883	25961440	-	1283	protein_coding	-	-
Os04g0448300	2550.87	2774.63	3196.03	1395.02	1152.27	1566.96	2840.51	1371.41	1.05042	1.32243e-10	4.86463e-09	-	4	22347957	22349743	+	1787	protein_coding	PF14541:Xylanase inhibitor C-terminal|PF14543:Xylanase inhibitor N-terminal	-
Os03g0265800	892.14	888.615	1125.02	407.455	421.917	522.63	968.591	450.667	1.10269	1.34463e-10	4.94002e-09	-	3	8788679	8789277	+	599	protein_coding	PF06127:Protein of unknown function (DUF962)	-
Os01g0695700	559.252	639.518	668.163	133.516	215.323	270.614	622.311	206.485	1.58768	1.36437e-10	5.00622e-09	-	1	28768976	28780102	+	3819	protein_coding	PF00664:ABC transporter transmembrane region|PF00005:ABC transporter	ABC_membrane
Os01g0687400	861.704	824.561	803.165	1423.79	1802.12	2126.79	829.81	1784.23	-1.10498	1.40457e-10	5.14718e-09	-	1	28354882	28356067	-	1186	protein_coding	PF00704:Glycosyl hydrolases family 18	-
Os06g0536100	32.3377	24.4013	41.0876	133.516	110.571	105.084	32.6089	116.391	-1.83106	1.42467e-10	5.20767e-09	-	6	20087878	20089203	-	1058	protein_coding	PF13639:Ring finger domain	-
Os06g0129900	1463.76	1390.87	1807.86	835.628	655.669	759.766	1554.16	750.354	1.05118	1.46116e-10	5.32763e-09	-	6	1581991	1585738	-	1913	protein_coding	PF00067:Cytochrome P450	p450
Os06g0520733	26.631	19.3177	27.3918	90.9293	89.2331	146.001	24.4468	108.721	-2.15369	1.483e-10	5.40047e-09	-	6	19157238	19158412	-	375	protein_coding	-	-
Os01g0289600	1022.44	744.24	1065.34	393.643	351.113	460.323	944.008	401.693	1.2325	1.48607e-10	5.40484e-09	-	1	10471169	10478800	+	1263	protein_coding	PF03106:WRKY DNA -binding domain	WRKY
Os11g0490900	250.141	218.595	358.049	57.5502	84.3834	98.5743	275.595	80.1693	1.77569	1.49944e-10	5.44664e-09	-	11	17352249	17355819	+	1174	protein_coding	PF03106:WRKY DNA -binding domain	WRKY
Os09g0309200	268.213	185.043	190.764	471.911	556.737	492.871	214.673	507.173	-1.2398	1.54539e-10	5.60655e-09	-	9	8173211	8177505	+	1644	protein_coding	PF07887:Calmodulin binding protein-like	-
EPlOSAG00000024029	24.7288	27.4515	18.5873	95.5333	83.4135	146.001	23.5892	108.316	-2.20229	1.58701e-10	5.75032e-09	-	8	14616533	14616617	-	85	ncRNA	-	-
Os02g0640300	262.506	296.883	323.81	146.177	126.09	130.192	294.399	134.153	1.13609	1.63476e-10	5.91595e-09	-	2	25696949	25698399	-	1304	protein_coding	PF00173:Cytochrome b5-like Heme/Steroid binding domain	-
Os01g0151400	2126.68	2418.78	3344.73	1114.17	1086.32	1212.65	2630.06	1137.71	1.20884	1.64227e-10	5.93571e-09	-	1	2776973	2781723	+	2393	protein_coding	PF01019:Gamma-glutamyltranspeptidase	-
novel.2040	948.255	1267.85	1297.2	578.955	527.639	584.006	1171.1	563.533	1.05526	1.70029e-10	6.13777e-09	-	7	18236232	18237087	-	856	-	-	-
Os09g0413600	4755.54	4228.54	5172.15	1970.52	2040.72	2714.51	4718.75	2241.92	1.07337	1.70391e-10	6.14318e-09	-	9	14694461	14699068	-	4260	protein_coding	-	-
Os02g0666700	430.852	488.026	514.574	212.936	261.88	226.907	477.817	233.907	1.0288	1.71849e-10	6.18805e-09	-	2	27077280	27079003	+	1724	protein_coding	PF02133:Permease for cytosine/purines, uracil, thiamine, allantoin	-
Os07g0142700	26.631	16.2675	33.2614	104.741	112.511	91.1347	25.3867	102.796	-2.0137	1.73771e-10	6.24952e-09	-	7	2187512	2188973	-	1462	protein_coding	PF02458:Transferase family	-
Os07g0624600	76.0887	33.5518	67.5011	234.805	195.925	346.87	59.0472	259.2	-2.13261	1.78095e-10	6.38125e-09	-	7	25867212	25871232	+	1517	protein_coding	PF02358:Trehalose-phosphatase	-
Os07g0526400	295.795	392.454	423.594	165.744	154.218	132.052	370.614	150.672	1.30043	1.8074e-10	6.46803e-09	-	7	20504692	20506402	-	1626	protein_coding	PF02797:Chalcone and stilbene synthases, C-terminal domain|PF00195:Chalcone and stilbene synthases, N-terminal domain	Chal_sti_synt_C
Os11g0204800	89.4042	72.1872	78.2622	178.406	211.444	256.665	79.9512	215.505	-1.43212	1.81338e-10	6.48144e-09	-	11	5282088	5284666	+	2579	protein_coding	-	-
Os03g0445700	122.693	152.508	131.089	432.777	390.88	979.233	135.43	600.963	-2.1508	1.84729e-10	6.58639e-09	-	3	18935194	18936295	-	1011	protein_coding	PF03195:Lateral organ boundaries (LOB) domain	-
Os01g0908600	83.6975	97.6053	96.8494	24.1711	17.4586	29.7583	92.7174	23.796	1.95975	1.86749e-10	6.65025e-09	-	1	39562727	39565686	+	1635	protein_coding	PF01490:Transmembrane amino acid transporter protein	Aa_trans
Os02g0120200	7.60887	18.301	31.3049	133.516	173.616	92.9946	19.0716	133.376	-2.80796	1.88219e-10	6.69436e-09	-	2	1061877	1066211	+	2892	protein_coding	PF12357:Phospholipase D C terminal|PF00614:Phospholipase D Active site motif	-
Os09g0376700	308.159	373.137	315.983	157.687	161.977	129.262	332.426	149.642	1.15298	1.96432e-10	6.96085e-09	-	9	12637799	12639123	+	1325	protein_coding	PF13639:Ring finger domain	-
Os06g0504900	33.2888	45.7525	66.5228	1.151	2.90977	2.78984	48.5214	2.28354	4.37412	1.96971e-10	6.97143e-09	-	6	17915923	17917083	-	1161	protein_coding	PF03106:WRKY DNA -binding domain	WRKY
Os05g0526200	67.5287	63.0367	55.7618	183.01	199.804	391.507	62.1091	258.107	-2.05688	2.03824e-10	7.1964e-09	-	5	26175584	26177039	+	1215	protein_coding	-	-
Os10g0461100	49.4576	25.418	28.37	125.459	130.94	125.543	34.4152	127.314	-1.88326	2.06954e-10	7.29801e-09	-	10	16961640	16976831	-	2060	protein_coding	PF01789:PsbP	-
Os03g0793900	1185.08	1534.23	2033.84	651.468	650.819	517.98	1584.38	606.756	1.38512	2.08596e-10	7.34698e-09	-	3	33026084	33027418	-	645	protein_coding	PF14368:Probable lipid transfer	-
Os01g0827300	2221.79	3903.19	4010.94	1129.13	1271.57	1306.57	3378.64	1235.76	1.4508	2.14485e-10	7.54524e-09	-	1	35402795	35405298	+	2022	protein_coding	PF07731:Multicopper oxidase|PF07732:Multicopper oxidase|PF00394:Multicopper oxidase	-
Os01g0102900	90.3553	56.9364	70.4359	195.671	231.812	357.099	72.5759	261.527	-1.84985	2.38765e-10	8.35879e-09	-	1	169390	170316	-	652	protein_coding	PF07207:Light regulated protein Lir1	-
Os08g0157500	59803.8	67381.2	74557.4	27726.5	29214.1	38700.6	67247.5	31880.4	1.07678	2.42351e-10	8.47409e-09	-	8	3337800	3340918	-	1428	protein_coding	PF08100:Dimerisation domain|PF00891:O-methyltransferase	-
Os09g0433800	3911.91	2270.34	2623.74	697.508	721.624	1226.6	2935.33	881.91	1.73434	2.43724e-10	8.51185e-09	-	9	15927027	15928052	+	915	protein_coding	PF04570:zinc-finger of the FCS-type, C2-C2	-
Os02g0753000	758.033	516.495	528.27	1506.66	1309.4	2064.48	600.932	1626.85	-1.43673	2.47835e-10	8.64499e-09	-	2	31663080	31665818	+	1423	protein_coding	PF02358:Trehalose-phosphatase	-
novel.1080	12.3644	8.13377	8.80449	56.3992	53.3458	59.5165	9.76756	56.4205	-2.52612	2.58082e-10	8.97005e-09	-	3	9417545	9418871	+	1327	-	-	-
Os03g0261100	1176.52	1187.53	1538.83	559.388	413.188	636.083	1300.96	536.219	1.2787	2.59496e-10	9.00838e-09	-	3	8487523	8489366	+	894	protein_coding	-	-
novel.261	7009.67	8849.54	8972.76	3182.52	3749.73	4535.35	8277.32	3822.53	1.11441	2.66497e-10	9.24037e-09	-	1	29559852	29562135	-	2147	-	PF02347:Glycine cleavage system P-protein	-
Os10g0467800	1362.94	1972.44	1993.73	493.78	467.504	814.633	1776.37	591.972	1.58447	2.8359e-10	9.80958e-09	-	10	17262050	17266561	+	3425	protein_coding	PF03552:Cellulose synthase	-
Os09g0379900	2585.11	3117.27	3171.57	5779.19	5486.86	7713.9	2957.98	6326.65	-1.09695	2.8517e-10	9.85247e-09	-	9	12802546	12805244	-	2699	protein_coding	PF03639:Glycosyl hydrolase family 81	-
Os11g0455800	22090.4	28467.2	26514.2	9831.87	12088.2	14071	25690.6	11997	1.09849	2.86306e-10	9.87995e-09	-	11	15436736	15440042	+	1897	protein_coding	PF00464:Serine hydroxymethyltransferase	SHMT
Os05g0560200	799.882	656.802	773.817	416.663	312.316	341.29	743.5	356.756	1.06164	2.8961e-10	9.98209e-09	-	5	27883739	27884410	-	672	protein_coding	PF14144:Seed dormancy control	-
Os03g0859100	59.9198	72.1872	67.5011	212.936	146.459	211.098	66.5361	190.164	-1.51481	2.95598e-10	1.01764e-08	-	3	36256124	36259391	-	2676	protein_coding	-	-
Os01g0214600	1652.08	2504.18	3082.55	1012.88	682.827	710.479	2412.94	802.063	1.58963	2.96627e-10	1.01997e-08	-	1	6267440	6270770	+	1412	protein_coding	PF00657:GDSL-like Lipase/Acylhydrolase	Lipase_GDSL
Os01g0743200	255.848	339.585	243.591	639.958	568.376	591.446	279.675	599.926	-1.10135	3.03592e-10	1.04268e-08	-	1	31055619	31058475	-	1657	protein_coding	PF01095:Pectinesterase	-
Os01g0750300	7228.42	10287.2	10034.2	2779.67	2573.21	4425.61	9183.27	3259.5	1.4942	3.16225e-10	1.08478e-08	-	1	31422946	31428670	+	3461	protein_coding	PF03552:Cellulose synthase	-
Os04g0486950	631.536	446.341	557.618	1210.86	1134.81	1673.9	545.165	1339.86	-1.29732	3.20707e-10	1.09886e-08	-	4	24325769	24328250	-	2046	protein_coding	PF01274:Malate synthase	-
Os01g0281600	132.204	139.291	132.067	28.7751	52.3759	25.1085	134.521	35.4198	1.9215	3.29271e-10	1.12687e-08	-	1	10048273	10050309	-	1073	protein_coding	PF02298:Plastocyanin-like domain	Cu_bind_like
Os07g0524200	107.475	167.759	170.22	41.4361	10.6692	20.4588	148.485	24.188	2.63603	3.58598e-10	1.22444e-08	-	7	20348669	20349531	+	863	protein_coding	PF03168:Late embryogenesis abundant protein	-
Os12g0548401	1045.27	1307.5	1228.72	4251.81	7096.94	2544.33	1193.83	4631.03	-1.95577	3.58626e-10	1.22444e-08	-	12	22193325	22193831	-	507	protein_coding	-	-
Os12g0121000	227.315	189.11	181.96	512.196	378.271	559.827	199.462	483.431	-1.2766	3.61144e-10	1.23159e-08	-	12	988599	989874	-	895	protein_coding	-	-
Os07g0638100	894.993	1329.87	942.081	2302.01	2222.1	2297.9	1055.65	2274	-1.10737	3.65125e-10	1.24224e-08	-	7	26542983	26545180	+	2198	protein_coding	PF07676:WD40-like Beta Propeller Repeat	PD40
Os04g0109400	136.008	131.157	139.894	275.09	263.819	317.112	135.686	285.34	-1.07316	3.88544e-10	1.32037e-08	-	4	560485	562482	+	1998	protein_coding	PF00139:Legume lectin domain|PF00069:Protein kinase domain	Pkinase
Os07g0661000	396.612	443.291	568.379	203.728	167.797	219.467	469.427	196.997	1.25276	4.03422e-10	1.36932e-08	-	7	27865026	27868232	+	1229	protein_coding	PF00962:Adenosine/AMP deaminase	-
Os06g0329350	45.6532	48.8026	64.5663	145.026	184.286	140.422	53.0074	156.578	-1.56346	4.05158e-10	1.37219e-08	-	6	13010100	13010587	-	488	protein_coding	-	-
Os04g0101400	315.768	386.354	450.007	141.573	88.2631	157.161	384.043	128.999	1.57441	4.05215e-10	1.37219e-08	-	4	99797	101630	-	1736	protein_coding	PF00067:Cytochrome P450	p450
novel.1489	54.2132	16.2675	40.1094	210.634	181.376	150.651	36.8634	180.887	-2.28956	4.08464e-10	1.38158e-08	-	4	27169258	27177577	-	7205	-	-	-
Os01g0555200	717.136	646.635	797.296	324.583	334.624	409.176	720.355	356.128	1.01496	4.10711e-10	1.38733e-08	-	1	20938340	20941280	-	2261	protein_coding	PF01177:Asp/Glu/Hydantoin racemase	Asp_Glu_race
Os08g0102700	1552.21	1658.27	2028.95	812.608	722.594	963.424	1746.48	832.875	1.06797	4.13642e-10	1.39421e-08	-	8	151908	153452	-	1545	protein_coding	PF03168:Late embryogenesis abundant protein	-
Os05g0446900	106.524	107.772	113.48	35.6811	32.9774	40.9176	109.259	36.5254	1.57859	4.17228e-10	1.40467e-08	-	5	21914875	21917380	-	1663	protein_coding	PF00686:Starch binding domain	-
Os08g0189500	719.038	495.143	866.753	2491.92	1855.47	1600.44	693.645	1982.61	-1.51462	4.32696e-10	1.45505e-08	-	8	5238999	5240148	+	973	protein_coding	PF00190:Cupin	-
Os11g0707000	1097.58	1152.96	820.774	2319.27	3702.2	6642.6	1023.77	4221.36	-2.04399	4.3468e-10	1.46003e-08	-	11	28932977	28936031	-	1719	protein_coding	PF00004:ATPase family associated with various cellular activities (AAA)	AAA
Os03g0389700	887.384	998.42	1162.19	408.606	430.646	556.108	1016	465.12	1.12589	4.59716e-10	1.54055e-08	-	3	15603830	15608696	+	2060	protein_coding	PF01474:Class-II DAHP synthetase family	-
Os05g0411100	64.6754	35.5853	80.2187	219.842	193.015	328.271	60.1598	247.042	-2.0371	4.70183e-10	1.572e-08	-	5	20099104	20101168	+	1903	protein_coding	PF00854:POT family	-
Os10g0320100	1115.65	960.802	1159.26	482.27	504.361	628.643	1078.57	538.425	1.00124	4.84717e-10	1.615e-08	-	10	8679311	8681266	+	1863	protein_coding	PF00067:Cytochrome P450	p450
Os05g0555600	137.911	82.3544	94.8929	24.1711	25.218	28.8283	105.053	26.0725	2.00827	4.87241e-10	1.62155e-08	-	5	27631211	27636450	+	2257	protein_coding	PF14691:Dihydroprymidine dehydrogenase domain II, 4Fe-4S cluster|PF07992:Pyridine nucleotide-disulphide oxidoreductase	Pyr_redox_2
Os07g0600200	428.95	757.457	644.684	176.103	114.451	229.697	610.364	173.417	1.81474	5.09343e-10	1.68928e-08	-	7	24487821	24488449	-	629	protein_coding	-	-
Os02g0250400	9068.82	12611.4	11675.7	5313.03	4838.95	6073.48	11118.7	5408.49	1.03963	5.23074e-10	1.72889e-08	-	2	8501519	8504975	+	3219	protein_coding	-	-
Os10g0568200	219.706	124.04	148.698	488.025	395.729	605.395	164.148	496.383	-1.59561	5.26203e-10	1.73725e-08	-	10	22526937	22533205	+	4233	protein_coding	-	-
Os06g0699700	398.514	467.692	386.419	156.536	191.075	217.607	417.542	188.406	1.14422	5.45989e-10	1.7944e-08	-	6	29417421	29418950	+	1433	protein_coding	PF00425:chorismate binding enzyme	-
Os03g0195100	554.496	611.05	642.728	1046.26	1508.23	1699.94	602.758	1418.15	-1.23509	5.98076e-10	1.95892e-08	ALD1	3	4936472	4941037	+	1323	protein_coding	PF00155:Aminotransferase class I and II	Aminotran_1_2
Os09g0422500	2306.44	3041.01	3169.62	851.742	843.834	1412.59	2839.02	1036.05	1.45372	6.07125e-10	1.98631e-08	-	9	15281320	15285893	+	3629	protein_coding	PF14569:Zinc-binding RING-finger|PF03552:Cellulose synthase	-
Os02g0173200	2471.93	2964.76	3802.56	882.819	1102.8	1465.59	3079.75	1150.41	1.42007	6.11952e-10	1.99985e-08	-	2	4008991	4010136	+	1146	protein_coding	PF05678:VQ motif	-
Os08g0537200	233.973	223.679	266.091	94.3823	102.812	119.963	241.248	105.719	1.18665	6.23129e-10	2.02951e-08	-	8	26861859	26862428	-	570	protein_coding	-	-
Os05g0162000	2320.7	1301.4	2024.05	4269.07	4996.08	4933.36	1882.05	4732.84	-1.33032	6.43523e-10	2.09358e-08	-	5	3645962	3648067	-	1355	protein_coding	PF00141:Peroxidase	-
Os06g0699301	336.692	324.334	304.244	125.459	148.398	172.04	321.757	148.633	1.10992	6.63792e-10	2.15469e-08	-	6	29386785	29387394	-	492	protein_coding	-	-
Os05g0356700	541.181	610.033	875.558	284.298	181.376	250.155	675.59	238.61	1.50295	7.03848e-10	2.2796e-08	-	5	16897434	16899135	-	1550	protein_coding	PF13839:GDSL/SGNH-like Acyl-Esterase family found in Pmr5 and Cas1p|PF14416:PMR5 N terminal Domain	-
Os01g0935400	117.937	103.706	133.046	46.0401	35.8872	31.6182	118.23	37.8485	1.65309	7.09289e-10	2.29466e-08	-	1	41057220	41058809	-	1166	protein_coding	PF14226:non-haem dioxygenase in morphine synthesis N-terminal|PF03171:2OG-Fe(II) oxygenase superfamily	2OG-FeII_Oxy
Os07g0580800	296.746	454.474	410.876	941.521	784.669	897.398	387.366	874.529	-1.17514	7.13096e-10	2.3044e-08	-	7	23502927	23504391	-	1465	protein_coding	-	-
Os05g0528500	435.608	462.608	724.903	222.144	193.015	187.849	541.04	201.003	1.4298	7.23699e-10	2.33606e-08	-	5	26257051	26257809	-	447	protein_coding	-	-
Os10g0538200	221.608	482.943	240.656	1026.69	1004.84	1103.85	315.069	1045.13	-1.73073	7.46254e-10	2.40619e-08	-	10	20971240	20972640	+	1401	protein_coding	PF14543:Xylanase inhibitor N-terminal|PF14541:Xylanase inhibitor C-terminal	-
Os08g0104600	190.222	287.732	183.916	538.67	823.466	1461.87	220.623	941.337	-2.09414	7.64675e-10	2.46285e-08	-	8	241783	242628	-	846	protein_coding	PF00111:2Fe-2S iron-sulfur cluster binding domain	Fer2
Os06g0233800	441.314	436.174	621.206	177.254	182.346	238.996	499.565	199.532	1.32217	7.74842e-10	2.49282e-08	-	6	6953695	6956081	-	1599	protein_coding	PF14215:bHLH-MYC and R2R3-MYB transcription factors N-terminal	-
Os11g0242800	958.717	1102.13	834.47	2178.85	2687.66	4998.46	965.104	3288.32	-1.76884	7.82051e-10	2.51199e-08	-	11	7659701	7662180	+	1185	protein_coding	PF00504:Chlorophyll A-B binding protein	-
Os01g0795100	785.615	424.99	694.577	194.52	185.256	257.595	635.061	212.457	1.57895	7.88194e-10	2.52736e-08	-	1	33675136	33679717	+	2211	protein_coding	PF05922:Peptidase inhibitor I9|PF00082:Subtilase family	Peptidase_S8
Os06g0535200	124.595	119.973	153.589	272.788	301.647	278.984	132.719	284.473	-1.10015	7.98411e-10	2.5573e-08	-	6	20033286	20034343	-	1058	protein_coding	PF13639:Ring finger domain	-
Os10g0100300	50.4087	69.1371	31.3049	150.781	239.571	383.138	50.2836	257.83	-2.36124	8.26375e-10	2.64394e-08	TIC62	10	46031	58278	-	1700	protein_coding	PF13460:NAD(P)H-binding	-
Os04g0412300	82.7464	200.294	158.481	529.461	490.782	464.973	147.174	495.072	-1.75124	8.34081e-10	2.66566e-08	-	4	20372912	20377754	+	2311	protein_coding	PF00332:Glycosyl hydrolases family 17	Glyco_hydro_17
Os01g0926700	4050.77	4857.9	4704.53	2059.14	2014.53	2718.23	4537.73	2263.97	1.00282	8.4466e-10	2.69649e-08	-	1	40633318	40634763	-	923	protein_coding	PF03016:Exostosin family	-
Os04g0659300	3127.24	3142.69	5317.91	13987	18569.2	8584.33	3862.61	13713.5	-1.82793	8.53735e-10	2.72247e-08	-	4	33641298	33642277	+	980	protein_coding	PF01657:Salt stress response/antifungal	-
novel.83	12.3644	14.2341	8.80449	75.9662	62.0752	51.147	11.801	63.0628	-2.41537	8.58922e-10	2.736e-08	-	1	20874137	20878683	+	4444	-	PF04195:Putative gypsy type transposon	Transposase_28
Os04g0322100	28.5332	25.418	21.5221	78.2682	87.2932	108.804	25.1578	91.455	-1.86459	8.8226e-10	2.80725e-08	-	4	14863727	14864824	-	1098	protein_coding	PF01657:Salt stress response/antifungal	-
Os05g0200700	99.8664	106.756	107.61	34.5301	32.0075	39.0577	104.744	35.1984	1.57114	9.04905e-10	2.87615e-08	-	5	6292207	6293478	-	1272	protein_coding	-	-
Os03g0660000	11.4133	16.2675	6.84794	56.3992	60.1353	83.6951	11.5096	66.7432	-2.54302	9.15017e-10	2.9051e-08	-	3	25859710	25860366	-	657	protein_coding	-	-
Os01g0649900	736.158	711.705	765.013	230.201	290.977	395.227	737.625	305.468	1.26914	9.36316e-10	2.96947e-08	-	1	26222617	26225117	+	1421	protein_coding	PF00657:GDSL-like Lipase/Acylhydrolase	Lipase_GDSL
novel.1872	812.246	571.397	653.489	257.825	316.195	333.851	679.044	302.624	1.1645	9.69007e-10	3.06553e-08	-	6	22983302	22984740	-	775	-	-	-
Os05g0106200	520.256	283.665	357.071	92.0803	94.0827	151.581	386.998	112.581	1.77869	1.04381e-09	3.27455e-08	-	5	338917	340779	+	1369	protein_coding	PF00892:EamA-like transporter family	DUF6
Os05g0205400	6.65776	4.06689	5.86966	41.4361	39.7669	56.7267	5.53144	45.9766	-3.05268	1.07436e-09	3.36674e-08	-	5	6559752	6560051	+	300	protein_coding	-	-
Os03g0278900	120.791	157.592	133.046	295.808	397.669	584.936	137.143	426.138	-1.63781	1.08553e-09	3.39809e-08	-	3	9491526	9492494	-	969	protein_coding	PF00430:ATP synthase B/B' CF(0)	-
Os02g0204400	285.332	291.799	287.613	520.253	549.947	712.339	288.248	594.18	-1.04485	1.09404e-09	3.42104e-08	-	2	5835504	5838694	+	1669	protein_coding	PF00875:DNA photolyase|PF03441:FAD binding domain of DNA photolyase	-
Os06g0185100	125.546	215.545	161.416	50.6441	58.1955	47.4272	167.502	52.089	1.6839	1.10662e-09	3.45665e-08	-	6	4276289	4277154	+	866	protein_coding	PF13561:Enoyl-(Acyl carrier protein) reductase	-
Os10g0516900	291.99	225.712	243.591	61.0032	99.9022	106.014	253.764	88.9731	1.50529	1.11401e-09	3.47597e-08	-	10	19971805	19972640	-	733	protein_coding	-	-
Os03g0198300	388.052	421.939	396.202	737.793	802.128	1096.41	402.065	878.776	-1.12908	1.12646e-09	3.51104e-08	-	3	5161642	5166608	+	2244	protein_coding	-	-
Os03g0245700	2264.59	2316.09	3710.6	1065.83	1211.44	1115.01	2763.76	1130.76	1.28922	1.15235e-09	3.58787e-08	-	3	7686713	7688842	-	2130	protein_coding	PF08392:FAE1/Type III polyketide synthase-like protein|PF08541:3-Oxoacyl-[acyl-carrier-protein (ACP)] synthase III C terminal	-
Os09g0540800	197.831	195.211	238.7	87.4762	85.3534	99.5042	210.58	90.7779	1.21233	1.15697e-09	3.59839e-08	-	9	21292024	21293396	+	1229	protein_coding	PF00170:bZIP transcription factor	bZIP_1
Os08g0347000	115.084	80.321	79.2404	207.181	292.917	246.436	91.5485	248.844	-1.44277	1.19113e-09	3.70068e-08	-	8	15743541	15745120	-	599	protein_coding	-	-
Os05g0554000	298.648	432.107	255.33	1017.49	817.646	743.957	328.695	859.697	-1.38704	1.19295e-09	3.70236e-08	-	5	27542128	27545922	+	2889	protein_coding	PF01554:MatE	MatE
Os03g0401100	6751.92	6645.29	8778.08	18206.6	13735.1	14325.8	7391.76	15422.5	-1.06099	1.19506e-09	3.70351e-08	-	3	16282782	16290478	+	3802	protein_coding	PF07714:Protein tyrosine kinase	Pkinase_Tyr
Os10g0491000	355.714	166.742	214.243	626.146	951.496	1274.03	245.566	950.556	-1.95255	1.19588e-09	3.70351e-08	-	10	18640397	18641882	+	856	protein_coding	PF04450:Peptidase of plants and bacteria	-
Os04g0396500	558.301	856.079	872.623	268.184	330.744	333.851	762.334	310.926	1.29235	1.34952e-09	4.16598e-08	LAX2	4	19563980	19575929	+	1415	protein_coding	-	-
Os03g0643900	476.505	371.103	455.877	1087.7	808.917	858.34	434.495	918.318	-1.07842	1.3516e-09	4.16797e-08	-	3	24833917	24835197	-	1281	protein_coding	-	-
Os09g0387150	256.799	206.394	174.133	484.572	426.767	540.299	212.442	483.879	-1.18721	1.36751e-09	4.21255e-08	-	9	13208509	13211709	-	3106	protein_coding	-	-
Os10g0393800	39.9465	51.8528	59.6749	9.20803	0.969925	3.71978	50.4914	4.63258	3.5022	1.39118e-09	4.28092e-08	-	10	13131433	13133327	+	1472	protein_coding	PF00657:GDSL-like Lipase/Acylhydrolase	Lipase_GDSL
Os02g0727200	116.986	139.291	188.807	33.3791	47.5263	50.2171	148.362	43.7075	1.75537	1.4039e-09	4.31547e-08	-	2	30260591	30261180	+	590	protein_coding	-	-
Os05g0565400	20.9244	22.3679	19.5655	73.6642	79.5338	141.352	20.9526	98.1833	-2.23268	1.46311e-09	4.48796e-08	-	5	28128521	28131181	-	1195	protein_coding	PF04481:Protein of unknown function (DUF561)	-
Os05g0204600	155.031	148.441	133.046	14.963	40.7368	45.5673	145.506	33.7557	2.09176	1.46925e-09	4.50203e-08	-	5	6514746	6517280	+	2058	protein_coding	PF00643:B-box zinc finger	zf-B_box
Os09g0332100	217.804	269.431	308.157	125.459	88.2631	94.8545	265.131	102.859	1.37067	1.5167e-09	4.63762e-08	-	9	9933451	9934162	+	712	protein_coding	-	-
Os03g0718800	167.395	107.772	172.177	456.948	364.692	757.906	149.115	526.515	-1.81999	1.71113e-09	5.20466e-08	-	3	29110322	29111067	+	746	protein_coding	PF14547:Hydrophobic seed protein	-
Os06g0323100	3448.72	2201.2	3242.99	1298.33	1301.64	1440.49	2964.3	1346.82	1.1381	1.76309e-09	5.35148e-08	-	6	12604824	12606640	+	1294	protein_coding	PF03492:SAM dependent carboxyl methyltransferase	-
Os06g0698711	15.2177	6.10033	8.80449	64.4562	55.2857	54.8668	10.0409	58.2029	-2.52489	1.80179e-09	5.46323e-08	-	6	29341909	29342600	-	692	protein_coding	-	-
Os11g0135000	162.64	146.408	191.742	382.133	322.985	459.393	166.93	388.17	-1.21753	1.81368e-09	5.49353e-08	-	11	1626486	1631411	-	1885	protein_coding	PF07690:Major Facilitator Superfamily	MFS_1
Os07g0603300	1109.94	1021.81	1175.89	440.834	573.225	626.783	1102.55	546.948	1.00971	1.81681e-09	5.49727e-08	-	7	24664328	24669321	-	3128	protein_coding	PF14309:Domain of unknown function (DUF4378)	-
Os04g0411800	298.648	262.314	352.18	150.781	134.82	131.122	304.381	138.908	1.13425	1.83117e-09	5.53043e-08	-	4	20343298	20344950	+	1292	protein_coding	PF00561:alpha/beta hydrolase fold	Abhydrolase_1
Os11g0112200	142.666	175.893	152.611	46.0401	64.9849	64.1663	157.057	58.3971	1.41932	1.83159e-09	5.53043e-08	-	11	571319	573032	+	1140	protein_coding	PF00141:Peroxidase	-
Os01g0831250	113.182	220.629	91.958	432.777	514.06	632.363	141.923	526.4	-1.89281	1.84793e-09	5.57397e-08	-	1	35586264	35588352	+	1449	protein_coding	PF00909:Ammonium Transporter Family	Ammonium_transp
Os01g0279100	238.728	272.481	174.133	591.616	672.158	1393.99	228.448	885.921	-1.95608	1.92064e-09	5.78726e-08	-	1	9874379	9876678	+	1685	protein_coding	-	-
Os08g0547800	166.444	195.211	214.243	69.0602	58.1955	88.3449	191.966	71.8668	1.41469	1.96044e-09	5.90105e-08	-	8	27473747	27475042	-	1296	protein_coding	PF07859:alpha/beta hydrolase fold	Abhydrolase_3
Os01g0311800	1418.1	960.802	1033.06	2612.78	2418.02	3931.81	1137.32	2987.54	-1.39333	1.9817e-09	5.95889e-08	-	1	11715268	11717784	-	2436	protein_coding	PF04043:Plant invertase/pectin methylesterase inhibitor|PF01095:Pectinesterase	-
Os01g0589800	30.4355	29.4849	30.3266	75.9662	122.21	131.122	30.0823	109.766	-1.87192	2.07184e-09	6.22347e-08	-	1	23004127	23004931	+	304	protein_coding	-	-
Os08g0353700	95.1108	90.4882	50.8704	200.275	252.18	289.213	78.8231	247.223	-1.65069	2.16687e-09	6.49545e-08	-	8	16145099	16146233	-	661	protein_coding	-	-
Os07g0125500	1128.01	1864.67	840.34	4446.33	5443.22	3187.85	1277.67	4359.13	-1.77062	2.22149e-09	6.63176e-08	-	7	1352187	1352942	+	756	protein_coding	PF00188:Cysteine-rich secretory protein family	SCP
Os06g0496800	1104.24	1627.77	1813.73	584.71	645.97	708.619	1515.24	646.433	1.22836	2.26046e-09	6.74114e-08	-	6	17378401	17381302	+	1749	protein_coding	PF07714:Protein tyrosine kinase	Pkinase_Tyr
Os07g0599600	657.216	1607.44	1003.71	286.6	224.053	371.048	1089.45	293.9	1.88969	2.28663e-09	6.8052e-08	-	7	24472509	24473579	-	1071	protein_coding	-	-
Os03g0416200	282.479	409.739	301.309	100.137	81.4737	147.861	331.176	109.824	1.58959	2.31828e-09	6.8923e-08	-	3	17260407	17262436	+	1830	protein_coding	PF04833:COBRA-like protein	-
Os01g0628700	2081.02	2699.4	3124.62	1352.43	1276.42	1248.92	2635.01	1292.59	1.02766	2.38548e-09	7.08482e-08	-	1	25114083	25118356	+	2046	protein_coding	PF00067:Cytochrome P450	p450
Os01g0191300	1237.39	1176.35	1469.37	551.331	543.158	749.536	1294.37	614.675	1.07349	2.42409e-09	7.19214e-08	-	1	4879215	4885840	-	5598	protein_coding	PF02365:No apical meristem (NAM) protein	NAM
Os10g0101200	68.4798	64.0535	77.2839	162.291	160.038	164.6	69.939	162.31	-1.21412	2.43468e-09	7.21616e-08	-	10	110138	116452	-	1653	protein_coding	PF00450:Serine carboxypeptidase	Peptidase_S10
Os02g0589400	752.327	888.615	1082.95	387.888	281.278	441.724	907.965	370.297	1.29392	2.44754e-09	7.24686e-08	-	2	22741593	22743361	-	1769	protein_coding	PF00201:UDP-glucoronosyl and UDP-glucosyl transferase	UDPGT
Os03g0619875	509.794	349.752	307.179	1083.09	887.481	1679.48	388.908	1216.69	-1.64544	2.49149e-09	7.36947e-08	-	3	23512612	23513573	-	962	protein_coding	-	-
Os11g0171300	645.803	808.294	600.662	1368.54	2173.6	3376.63	684.919	2306.26	-1.75195	2.52669e-09	7.46597e-08	-	11	3488768	3491609	-	1492	protein_coding	PF00274:Fructose-bisphosphate aldolase class-I	-
Os06g0289900	149.324	296.883	212.286	37.9831	63.0451	69.7459	219.498	56.9247	1.93947	2.57372e-09	7.58946e-08	-	6	10588158	10589935	-	1778	protein_coding	PF00201:UDP-glucoronosyl and UDP-glucosyl transferase	UDPGT
Os03g0817800	3652.26	5549.27	5228.89	2197.27	1837.04	2418.79	4810.14	2151.03	1.161	2.60454e-09	7.67254e-08	-	3	34311282	34314797	-	3438	protein_coding	PF13839:GDSL/SGNH-like Acyl-Esterase family found in Pmr5 and Cas1p|PF14416:PMR5 N terminal Domain	-
Os05g0390300	196.879	331.451	258.265	89.7783	80.5037	107.874	262.199	92.7186	1.49769	2.71002e-09	7.96707e-08	-	5	18919135	18920528	+	1257	protein_coding	PF11250:Fantastic Four meristem regulator	-
Os03g0184300	2772.48	3585.98	3755.61	1368.54	1190.1	1836.64	3371.35	1465.09	1.20205	2.7531e-09	8.07735e-08	-	3	4428838	4434161	+	2340	protein_coding	PF01501:Glycosyl transferase family 8	Glyco_transf_8
Os01g0746400	84.6486	71.1705	72.3925	23.0201	20.3684	20.4588	76.0705	21.2824	1.84247	2.80821e-09	8.2307e-08	-	1	31225458	31228566	-	1710	protein_coding	PF03055:Retinal pigment epithelial membrane protein	RPE65
Os04g0627400	295.795	324.334	364.897	90.9293	96.9925	161.811	328.342	116.577	1.48913	2.81325e-09	8.23713e-08	-	4	31937356	31939121	-	1766	protein_coding	-	-
Os03g0775000	11.4133	10.1672	18.5873	59.8522	69.8346	155.301	13.3893	94.9959	-2.82937	2.8236e-09	8.2591e-08	-	3	32136863	32139508	-	1129	protein_coding	PF04072:Leucine carboxyl methyltransferase	-
Os06g0557700	174.053	129.124	171.198	49.4931	53.3458	67.886	158.125	56.9083	1.46992	2.88113e-09	8.41887e-08	-	6	21279310	21282208	+	2738	protein_coding	PF13855:Leucine rich repeat|PF00069:Protein kinase domain	Pkinase
Os01g0719100	710.478	657.819	885.341	1816.28	1441.31	1396.78	751.212	1551.46	-1.04575	2.91087e-09	8.49721e-08	-	1	29965312	29970765	-	3351	protein_coding	-	-
Os03g0291500	4558.66	6406.36	4008	11446.7	10441.2	10619.1	4991.01	10835.7	-1.11842	2.93878e-09	8.57007e-08	-	3	10120289	10124384	-	2238	protein_coding	PF13537:Glutamine amidotransferase domain|PF00733:Asparagine synthase	-
Os01g0501800	520.256	657.819	467.616	1168.27	1871.95	3349.66	548.564	2129.96	-1.9575	2.97309e-09	8.64403e-08	-	1	17349338	17350785	+	1331	protein_coding	PF01716:Manganese-stabilising protein / photosystem II polypeptide	-
Os07g0282500	126.497	137.257	179.025	46.0401	31.0376	56.7267	147.593	44.6015	1.7255	3.02749e-09	8.78561e-08	-	7	10765848	10767128	+	1187	protein_coding	-	-
Os01g0191700	3256.59	2206.29	2752.87	6953.21	4926.25	7426.55	2738.58	6435.33	-1.23249	3.02785e-09	8.78561e-08	-	1	4905609	4909339	+	1997	protein_coding	PF00365:Phosphofructokinase	PFK
Os06g0180666	574.469	597.832	735.664	329.187	267.699	338.5	635.989	311.795	1.02883	3.05013e-09	8.84142e-08	-	6	3995309	3996180	+	788	protein_coding	-	-
Os08g0545200	111.28	77.2708	133.046	392.492	247.331	308.742	107.199	316.188	-1.55806	3.07475e-09	8.90388e-08	-	8	27315939	27318463	+	1587	protein_coding	PF08240:Alcohol dehydrogenase GroES-like domain|PF00107:Zinc-binding dehydrogenase	ADH_N
Os05g0576600	757.082	1104.16	1207.19	290.053	355.962	481.712	1022.81	375.909	1.44243	3.1663e-09	9.15984e-08	-	5	28710320	28711241	-	922	protein_coding	-	-
Os10g0167200	111.28	68.1203	91.958	224.446	261.88	415.686	90.4527	300.67	-1.73335	3.20932e-09	9.27502e-08	-	10	4629337	4630248	+	912	protein_coding	PF00067:Cytochrome P450	p450
Os07g0582400	544.985	574.448	588.923	262.429	249.271	341.29	569.452	284.33	1.00022	3.25489e-09	9.39735e-08	-	7	23582270	23584330	+	1962	protein_coding	PF00083:Sugar (and other) transporter	Sugar_tr
Os07g0287100	84.6486	83.3712	70.4359	172.65	176.526	215.747	79.4852	188.308	-1.24621	3.26699e-09	9.4229e-08	-	7	11064783	11076991	+	2501	protein_coding	-	-
Os03g0411800	2202.77	2902.74	3405.38	1441.06	1102.8	1298.2	2836.96	1280.69	1.14769	3.29977e-09	9.50801e-08	-	3	17008027	17011263	-	1332	protein_coding	PF02535:ZIP Zinc transporter	-
Os05g0135500	4785.03	5317.45	5273.89	1880.74	1164.88	2495.97	5125.46	1847.2	1.47227	3.34862e-09	9.63917e-08	-	5	2080597	2082747	+	1408	protein_coding	PF00141:Peroxidase	-
Os01g0910500	1147.99	963.852	1305.02	523.706	336.564	543.088	1138.95	467.786	1.28431	3.43137e-09	9.86756e-08	-	1	39670759	39672253	-	1495	protein_coding	-	-
Os10g0398600	649.607	873.364	1026.21	390.19	390.88	380.348	849.728	387.139	1.13408	3.50195e-09	1.00506e-07	-	10	13422377	13423710	-	1334	protein_coding	PF03018:Dirigent-like protein	-
Os02g0754450	100.817	169.792	131.089	39.1341	36.8571	46.4973	133.9	40.8295	1.71007	3.66291e-09	1.05022e-07	-	2	31725230	31725697	+	468	protein_coding	PF00249:Myb-like DNA-binding domain	Myb_DNA-binding
Os03g0826200	110.329	129.124	140.872	292.355	408.338	764.415	126.775	488.37	-1.94714	3.6809e-09	1.0543e-07	-	3	34707024	34707736	+	583	protein_coding	-	-
Os03g0200200	639.145	542.929	649.576	245.164	268.669	349.66	610.55	287.831	1.08275	3.68445e-09	1.0543e-07	-	3	5261710	5263669	+	1009	protein_coding	PF14009:Domain of unknown function (DUF4228)	-
Os05g0355700	185.466	422.956	411.855	80.5702	80.5037	108.804	340.092	89.9592	1.91635	3.70204e-09	1.05829e-07	-	5	16867985	16870785	+	1064	protein_coding	-	-
Os06g0555101	1589.3	1552.53	2325.36	608.881	673.128	914.137	1822.4	732.048	1.31512	3.77853e-09	1.07605e-07	-	6	21122083	21126059	+	702	protein_coding	PF14510:ABC-transporter extracellular N-terminal|PF00005:ABC transporter	ABC_tran
Os09g0442100	482.212	407.705	500.878	113.949	123.18	225.047	463.598	154.059	1.58578	3.79362e-09	1.07915e-07	-	9	16422290	16425218	-	1769	protein_coding	PF07714:Protein tyrosine kinase	Pkinase_Tyr
Os01g0703300	486.016	651.718	624.141	232.503	250.241	317.112	587.292	266.618	1.13705	3.88429e-09	1.10278e-07	-	1	29152729	29154822	+	2019	protein_coding	-	-
Os10g0512400	868.362	871.33	1110.34	256.674	359.842	475.202	950.012	363.906	1.38227	3.91913e-09	1.11158e-07	-	10	19728265	19735008	-	2088	protein_coding	PF00067:Cytochrome P450	p450
Os01g0309800	155.031	109.806	149.676	400.549	326.865	282.704	138.171	336.706	-1.28216	3.97554e-09	1.12428e-07	-	1	11611069	11612597	+	1187	protein_coding	PF00403:Heavy-metal-associated domain	HMA
Os07g0107300	161.688	158.609	183.916	65.6072	79.5338	69.7459	168.071	71.629	1.22801	4.01108e-09	1.13323e-07	-	7	404540	405497	-	958	protein_coding	PF03018:Dirigent-like protein	-
Os11g0146100	13.3155	16.2675	10.761	61.0032	53.3458	95.7844	13.448	70.0445	-2.38578	4.04089e-09	1.14054e-07	-	11	2087799	2089433	-	1635	protein_coding	PF02493:MORN repeat	MORN
Os03g0338000	979.641	922.166	1351.98	392.492	291.947	519.84	1084.6	401.426	1.43355	4.09887e-09	1.15578e-07	-	3	12556849	12559702	-	2096	protein_coding	PF00202:Aminotransferase class-III	Aminotran_3
Os12g0102600	52.311	72.1872	75.3273	170.348	192.045	324.551	66.6085	228.982	-1.78452	4.14455e-09	1.16752e-07	-	12	125923	128272	+	2350	protein_coding	PF13041:PPR repeat family	-
Os10g0469900	409.928	673.07	600.662	230.201	162.947	238.996	561.22	210.715	1.41354	4.16433e-09	1.17196e-07	-	10	17374458	17378953	+	2061	protein_coding	PF00854:POT family	-
Os01g0192900	148.373	161.659	150.655	430.475	339.474	285.493	153.562	351.814	-1.19395	4.17328e-09	1.17334e-07	-	1	5002454	5004321	-	1643	protein_coding	PF00155:Aminotransferase class I and II	Aminotran_1_2
Os12g0638200	75.1376	239.946	152.611	34.5301	20.3684	26.0385	155.898	26.979	2.53589	4.18129e-09	1.17445e-07	-	12	27346312	27350659	-	2074	protein_coding	PF00854:POT family	-
Os09g0570400	663.874	645.618	778.708	1285.67	1302.61	1823.62	696.067	1470.63	-1.07954	4.23189e-09	1.18751e-07	-	9	22767376	22771605	+	2525	protein_coding	PF07690:Major Facilitator Superfamily	MFS_1
Os05g0244500	169.297	191.144	179.025	506.441	326.865	407.316	179.822	413.541	-1.20013	4.24002e-09	1.18784e-07	-	5	8766745	8774386	-	2162	protein_coding	PF00150:Cellulase (glycosyl hydrolase family 5)	-
Os04g0545700	687.651	1084.84	1254.15	430.475	368.571	391.507	1008.88	396.851	1.34643	4.24125e-09	1.18784e-07	-	4	27336576	27337862	-	1152	protein_coding	PF02458:Transferase family	-
Os03g0595300	17.1199	21.3512	14.6742	64.4562	82.4436	173.9	17.7151	106.933	-2.59878	4.27707e-09	1.19556e-07	-	3	22150420	22151574	-	724	protein_coding	-	-
Os02g0669100	8414.45	6041.36	6521.19	22244.3	15936.8	13206.2	6992.34	17129.1	-1.29253	4.38725e-09	1.22517e-07	-	2	27165514	27166898	-	1291	protein_coding	PF00257:Dehydrin	-
Os01g0655500	408.025	292.816	413.811	757.36	745.872	730.937	371.551	744.723	-1.00238	4.42485e-09	1.23449e-07	-	1	26611799	26618704	+	3435	protein_coding	-	-
Os02g0232000	473.652	252.147	319.897	1512.42	934.037	871.359	348.565	1105.94	-1.66473	4.64197e-09	1.29381e-07	-	2	7464028	7465505	+	1392	protein_coding	PF00447:HSF-type DNA-binding	HSF_DNA-bind
Os05g0114000	5277.7	6225.39	5735.64	2068.35	3068.84	3073.47	5746.24	2736.89	1.06971	4.87082e-09	1.3563e-07	-	5	739658	742961	-	1161	protein_coding	PF00719:Inorganic pyrophosphatase	Pyrophosphatase
Os02g0158500	419.439	725.939	693.598	208.332	146.459	253.875	612.992	202.888	1.59471	4.90056e-09	1.36327e-07	-	2	3187973	3190043	-	1310	protein_coding	PF04669:Polysaccharide biosynthesis	-
Os04g0175450	248.239	247.063	294.461	134.667	129.97	115.313	263.255	126.65	1.05788	4.99126e-09	1.38584e-07	-	4	5152085	5153404	+	1320	protein_coding	PF02458:Transferase family	-
Os01g0303000	41.8488	40.6689	37.1745	138.12	118.331	307.812	39.8974	188.088	-2.23893	5.05693e-09	1.40273e-07	-	1	11202609	11203331	-	723	protein_coding	PF02672:CP12 domain	-
Os09g0434500	16633	17463.2	23894.4	10270.4	8771.03	9869.52	19330.2	9636.98	1.00423	5.25365e-09	1.4559e-07	-	9	15959434	15962646	+	1601	protein_coding	PF00847:AP2 domain	AP2
Os03g0312100	50.4087	58.9698	60.6532	148.479	138.699	130.192	56.6773	139.124	-1.29483	5.50292e-09	1.52062e-07	-	3	11156621	11157004	+	384	protein_coding	-	-
Os04g0640500	89.4042	76.2541	96.8494	180.708	304.556	411.966	87.5026	299.077	-1.7749	5.62972e-09	1.55418e-07	-	4	32574405	32581634	+	2548	protein_coding	PF03109:ABC1 family	ABC1
Os03g0287800	608.709	811.344	707.294	351.056	287.098	384.998	709.116	341.05	1.05576	5.69809e-09	1.57156e-07	-	3	9946578	9949629	+	1170	protein_coding	PF03360:Glycosyltransferase family 43	-
Os11g0489250	4193.44	2938.33	2824.29	982.957	877.782	1627.41	3318.68	1162.71	1.51278	5.83766e-09	1.60547e-07	-	11	17234743	17237925	-	1617	protein_coding	PF00067:Cytochrome P450	p450
Os06g0656300	143.617	184.027	208.373	71.3622	74.6842	62.3064	178.672	69.4509	1.36418	5.89536e-09	1.6198e-07	-	6	26937180	26940953	+	975	protein_coding	PF04535:Domain of unknown function (DUF588)	-
Os03g0778100	148.373	143.358	123.263	293.506	452.955	773.715	138.331	506.725	-1.87432	6.02061e-09	1.65265e-07	-	3	32273066	32274174	-	1002	protein_coding	PF02507:Photosystem I reaction centre subunit III	-
Os03g0308800	860.753	795.076	1025.23	1720.75	1582.92	2215.13	893.688	1839.6	-1.0417	6.07348e-09	1.66558e-07	-	3	10992850	10997554	-	2961	protein_coding	-	-
Os02g0271600	158.835	351.786	376.637	52.9461	70.8045	92.0646	295.752	71.9384	2.03501	6.23234e-09	1.70592e-07	-	2	9826266	9829343	-	2156	protein_coding	PF00082:Subtilase family	Peptidase_S8
Os02g0704900	89.4042	109.806	106.632	35.6811	37.8271	31.6182	101.947	35.0421	1.5416	6.36432e-09	1.73876e-07	-	2	29081845	29086702	-	1115	protein_coding	PF00719:Inorganic pyrophosphatase	Pyrophosphatase
Os07g0214900	77.9909	149.458	83.1535	25.3221	26.188	16.739	103.534	22.7497	2.19035	6.53534e-09	1.7838e-07	-	7	6294479	6296305	-	1346	protein_coding	PF00195:Chalcone and stilbene synthases, N-terminal domain|PF02797:Chalcone and stilbene synthases, C-terminal domain	Chal_sti_synt_N
Os12g0626400	97.013	125.057	114.458	231.352	237.632	307.812	112.176	258.932	-1.20955	6.70602e-09	1.82801e-07	-	12	26780492	26783584	-	1499	protein_coding	PF00494:Squalene/phytoene synthase	-
Os05g0542732	635.34	689.337	1058.5	336.093	328.804	332.921	794.391	332.606	1.2561	6.71531e-09	1.82801e-07	-	5	26937607	26938300	+	694	protein_coding	PF15697:Domain of unknown function (DUF4666)	-
Os04g0652600	50.4087	29.4849	50.8704	142.724	124.15	124.613	43.588	130.496	-1.5775	6.71623e-09	1.82801e-07	-	4	33245194	33251252	+	1823	protein_coding	PF10275:Peptidase C65 Otubain	-
Os06g0500700	373.786	378.22	479.356	90.9293	76.624	182.269	410.454	116.608	1.81209	6.74077e-09	1.83125e-07	-	6	17630572	17632343	-	1648	protein_coding	PF00067:Cytochrome P450	p450
Os01g0349600	84.6486	95.5718	77.2839	185.312	212.413	178.55	85.8348	192.092	-1.1633	7.53068e-09	2.04202e-07	-	1	13934496	13935854	+	1359	protein_coding	-	-
Os10g0503800	871.215	673.07	1117.19	340.697	303.586	429.635	887.159	357.973	1.30888	7.54547e-09	2.04412e-07	-	10	19244954	19246731	-	1021	protein_coding	PF03766:Remorin, N-terminal region|PF03763:Remorin, C-terminal region	-
Os07g0171100	50.4087	55.9197	39.1311	118.553	182.346	297.583	48.4865	199.494	-2.04387	7.77038e-09	2.10308e-07	-	7	3759965	3761968	+	1454	protein_coding	-	-
Os02g0770800	2912.29	1952.11	2291.12	6528.49	5355.92	13252.7	2385.17	8379.02	-1.8127	7.81719e-09	2.11181e-07	-	2	32513749	32517155	-	3050	protein_coding	PF03404:Mo-co oxidoreductase dimerisation domain|PF00175:Oxidoreductase NAD-binding domain|PF00970:Oxidoreductase FAD-binding domain|PF00174:Oxidoreductase molybdopterin binding domain|PF00173:Cytochrome b5-like Heme/Steroid binding domain	NAD_binding_1
Os03g0736600	36.1421	88.4548	52.827	180.708	237.632	424.985	59.1413	281.108	-2.25237	7.82794e-09	2.11274e-07	-	3	30197329	30198770	+	1194	protein_coding	PF00213:ATP synthase delta (OSCP) subunit	-
Os03g0247750	100.817	93.5384	93.9146	32.2281	37.8271	27.8984	96.0901	32.6512	1.55846	7.86588e-09	2.12101e-07	-	3	7802434	7802697	+	264	protein_coding	-	-
Os03g0838800	120.791	205.378	203.482	63.3052	41.7068	57.6566	176.55	54.2229	1.70584	7.98234e-09	2.15041e-07	-	3	35251336	35252439	+	1104	protein_coding	-	-
Os11g0530600	46.6043	56.9364	91.958	8.05702	10.6692	13.9492	65.1662	10.8918	2.56699	8.12112e-09	2.18374e-07	-	11	19277597	19281006	-	1755	protein_coding	PF00195:Chalcone and stilbene synthases, N-terminal domain|PF02797:Chalcone and stilbene synthases, C-terminal domain	Chal_sti_synt_N
Os11g0558900	206.39	155.558	223.047	85.1742	48.4962	67.886	194.999	67.1855	1.54369	8.3504e-09	2.24331e-07	-	11	20770062	20773259	+	3198	protein_coding	PF13855:Leucine rich repeat|PF08263:Leucine rich repeat N-terminal domain	LRRNT_2
Os07g0593000	57.0665	41.6856	58.6966	132.365	128.03	152.511	52.4829	137.636	-1.39005	8.95373e-09	2.39872e-07	-	7	24164226	24164995	+	770	protein_coding	-	-
Os02g0610700	98.9153	62.02	72.3925	188.765	185.256	216.677	77.7759	196.899	-1.33867	9.20528e-09	2.46156e-07	-	2	23998075	24000801	-	2727	protein_coding	-	-
Os02g0460200	185.466	355.853	210.33	580.106	856.443	1261.94	250.549	899.495	-1.8452	9.32296e-09	2.49073e-07	-	2	15397485	15398605	-	1121	protein_coding	-	-
Os03g0705800	1442.83	1221.08	1151.43	428.173	361.782	677.931	1271.78	489.295	1.37723	9.33532e-09	2.49174e-07	-	3	28390417	28391991	+	1575	protein_coding	PF11250:Fantastic Four meristem regulator	-
Os02g0720400	4.75554	2.03344	3.91311	42.5871	26.188	61.3764	3.56736	43.3838	-3.59731	9.39519e-09	2.50541e-07	-	2	29886216	29888140	+	996	protein_coding	PF04720:PDDEXK-like family of unknown function	-
novel.574	65.6265	264.348	91.958	19.5671	20.3684	10.2294	140.644	16.7216	3.07705	9.5324e-09	2.53967e-07	-	11	7214959	7217081	-	1741	-	PF00891:O-methyltransferase|PF08100:Dimerisation domain	-
novel.1312	45.6532	67.1036	51.8487	10.359	12.609	9.29946	54.8685	10.7558	2.34933	9.71969e-09	2.58244e-07	-	4	7586049	7595739	+	1820	-	PF13968:Domain of unknown function (DUF4220)	-
Os01g0179000	1999.23	2534.69	2839.94	753.907	972.834	1293.55	2457.95	1006.77	1.28695	9.80186e-09	2.60189e-07	-	1	4110402	4112126	-	1725	protein_coding	PF02458:Transferase family	-
Os12g0514000	855.046	675.103	899.036	290.053	327.834	446.374	809.729	354.754	1.18894	1.00018e-08	2.65252e-07	-	12	19896368	19898637	-	1853	protein_coding	PF00083:Sugar (and other) transporter	Sugar_tr
Os08g0390100	274.87	341.618	326.744	131.214	128.03	172.04	314.411	143.761	1.12594	1.04486e-08	2.76849e-07	-	8	18480942	18486765	-	3674	protein_coding	PF05664:Plant family of unknown function (DUF810)	-
Os04g0462300	66.5776	68.1203	83.1535	154.234	169.737	204.588	72.6172	176.186	-1.28114	1.04697e-08	2.77156e-07	-	4	23094153	23095938	-	1114	protein_coding	-	-
Os08g0562800	224.462	265.364	332.614	105.892	85.3534	128.333	274.147	106.526	1.3626	1.06312e-08	2.81174e-07	-	8	28183873	28185866	-	1954	protein_coding	PF01554:MatE	MatE
Os06g0571800	16.1688	9.15049	7.82622	32.2281	125.12	226.907	11.0485	128.085	-3.53518	1.07168e-08	2.83179e-07	-	6	22155054	22157054	+	1645	protein_coding	PF00320:GATA zinc finger	GATA
Os07g0509700	167.395	173.859	174.133	314.224	371.481	497.521	171.796	394.409	-1.20099	1.08282e-08	2.85861e-07	-	7	19405852	19407067	-	1216	protein_coding	PF02190:ATP-dependent protease La (LON) substrate-binding domain	-
Os07g0461950	303.404	401.605	500.878	138.12	188.165	146.001	401.962	157.429	1.35078	1.08716e-08	2.86746e-07	-	7	16210463	16210929	+	361	protein_coding	PF00202:Aminotransferase class-III	Aminotran_3
Os10g0416500	277.724	180.976	233.808	469.609	577.105	809.053	230.836	618.589	-1.42249	1.10269e-08	2.90579e-07	-	10	14590045	14591113	+	1069	protein_coding	PF00704:Glycosyl hydrolases family 18	-
novel.1766	56.1154	49.8194	54.7835	8.05702	8.72932	14.8791	53.5727	10.5552	2.32748	1.14294e-08	3.00639e-07	-	6	22224624	22227407	+	2703	-	-	-
Os02g0750100	164.542	157.592	179.025	333.791	370.511	570.987	167.053	425.096	-1.34891	1.15497e-08	3.03295e-07	-	2	31527409	31527711	+	303	protein_coding	PF00213:ATP synthase delta (OSCP) subunit	-
Os04g0178400	1000.57	690.354	715.12	270.486	415.128	286.423	802.013	324.012	1.30682	1.15513e-08	3.03295e-07	-	4	5332365	5334476	-	1779	protein_coding	PF00067:Cytochrome P450	p450
Os07g0162700	269.164	186.06	226.96	109.345	86.3233	82.7652	227.395	92.8113	1.29818	1.16226e-08	3.0489e-07	-	7	3351308	3352672	-	1365	protein_coding	PF07859:alpha/beta hydrolase fold	Abhydrolase_3
Os01g0964333	16.1688	13.2174	11.7393	51.7951	57.2255	87.4149	13.7085	65.4785	-2.25877	1.16519e-08	3.05383e-07	-	1	42488143	42488813	-	471	protein_coding	-	-
EPlOSAG00000006919	163.591	117.94	136.959	54.0972	54.3158	53.9369	139.496	54.1166	1.36713	1.1705e-08	3.06222e-07	-	4	35091998	35092135	-	138	ncRNA	-	-
Os07g0169600	1838.49	1855.52	2306.78	4686.89	4064.95	3283.64	2000.26	4011.83	-1.00386	1.17895e-08	3.08154e-07	-	7	3699627	3701537	+	1301	protein_coding	PF14226:non-haem dioxygenase in morphine synthesis N-terminal|PF03171:2OG-Fe(II) oxygenase superfamily	2OG-FeII_Oxy
Os02g0285900	40.8977	37.6187	41.0876	92.0803	132.88	178.55	39.868	134.503	-1.75803	1.19432e-08	3.11889e-07	-	2	10747495	10749006	-	1512	protein_coding	PF02365:No apical meristem (NAM) protein	NAM
Os02g0705100	138.862	105.739	118.372	237.107	411.248	564.477	120.991	404.277	-1.74161	1.21642e-08	3.17374e-07	-	2	29099105	29101290	-	1539	protein_coding	PF12697:Alpha/beta hydrolase family	-
Os11g0126800	1538.89	2199.17	2432	435.079	282.248	845.321	2056.69	520.883	1.98069	1.24622e-08	3.24566e-07	-	11	1225190	1226553	+	717	protein_coding	PF01150:GDA1/CD39 (nucleoside phosphatase) family	-
Os02g0115700	6065.22	16674.2	14785.7	3591.13	3994.15	3363.61	12508.4	3649.63	1.77706	1.27897e-08	3.32156e-07	-	2	825041	827640	-	1904	protein_coding	PF06628:Catalase-related immune-responsive|PF00199:Catalase	Catalase
Os07g0497500	133.155	135.224	185.873	55.2482	35.8872	59.5165	151.417	50.2173	1.59382	1.27995e-08	3.32156e-07	-	7	18658755	18660353	-	1239	protein_coding	PF00249:Myb-like DNA-binding domain	Myb_DNA-binding
Os04g0661100	38.9954	53.8862	50.8704	5.75502	10.6692	7.43957	47.9174	7.95458	2.57642	1.28617e-08	3.33471e-07	-	4	33733561	33734332	-	521	protein_coding	PF00403:Heavy-metal-associated domain	HMA
Os07g0167700	135.057	94.5551	131.089	43.7381	30.0677	43.7075	120.234	39.1711	1.62175	1.29049e-08	3.34292e-07	-	7	3633980	3635156	+	699	protein_coding	-	-
Os03g0233000	328.132	244.013	152.611	771.172	656.639	1634.84	241.586	1020.89	-2.07936	1.31053e-08	3.39182e-07	-	3	7061772	7063303	+	1428	protein_coding	PF04678:Mitochondrial calcium uniporter	-
Os04g0122000	9.51108	7.11705	9.78277	40.2851	50.4361	52.077	8.80363	47.5994	-2.43546	1.32098e-08	3.41582e-07	-	4	1329948	1336530	-	3656	protein_coding	PF13855:Leucine rich repeat	-
Os04g0658300	42.7999	38.6354	34.2397	101.288	99.9022	137.632	38.5583	112.941	-1.5524	1.38708e-08	3.57717e-07	-	4	33575152	33579653	-	1692	protein_coding	PF00004:ATPase family associated with various cellular activities (AAA)	AAA
Os07g0104366	619.171	589.698	628.054	275.09	317.165	175.76	612.308	256.005	1.25946	1.39288e-08	3.58892e-07	-	7	252925	253553	-	629	protein_coding	PF00141:Peroxidase	-
Os06g0101600	252.044	344.669	245.548	591.616	915.609	1708.31	280.753	1071.84	-1.93352	1.44179e-08	3.71165e-07	-	6	149486	150187	-	702	protein_coding	PF00127:Copper binding proteins, plastocyanin/azurin family	-
Os01g0965900	336.692	247.063	370.767	593.918	1028.12	1292.62	318.174	971.554	-1.61094	1.51076e-08	3.88141e-07	-	1	42587307	42590270	-	1015	protein_coding	-	-
Os07g0644200	210.195	203.344	198.59	110.496	94.0827	90.2047	204.043	98.2612	1.05872	1.51175e-08	3.88141e-07	-	7	26816098	26819115	+	1634	protein_coding	-	-
Os01g0249200	8732.12	10362.4	13603.9	4099.87	4132.85	5862.38	10899.5	4698.37	1.21392	1.55017e-08	3.97301e-07	-	1	8203832	8206969	-	1039	protein_coding	PF00190:Cupin	-
Os10g0137300	1112.8	1221.08	1971.23	499.535	348.203	621.204	1435.04	489.647	1.55114	1.56766e-08	4.01074e-07	-	10	2317204	2317845	+	495	protein_coding	-	-
Os03g0277300	59.9198	93.5384	97.8277	21.8691	24.2481	20.4588	83.762	22.192	1.91535	1.57282e-08	4.0204e-07	-	3	9411494	9416082	-	2485	protein_coding	PF00012:Hsp70 protein	HSP70
Os11g0269700	19.0222	21.3512	19.5655	85.1742	84.3834	56.7267	19.9796	75.4281	-1.91424	1.57752e-08	4.02885e-07	-	11	9389546	9393369	+	3590	protein_coding	-	-
Os07g0175500	828.415	885.564	1196.43	452.344	510.18	375.698	970.137	446.074	1.12122	1.60785e-08	4.0991e-07	-	7	3976534	3977701	+	634	protein_coding	-	-
Os04g0178300	1440.93	1042.14	916.645	261.278	489.812	452.884	1133.24	401.324	1.49611	1.62664e-08	4.14337e-07	-	4	5318070	5326425	+	3230	protein_coding	PF01397:Terpene synthase, N-terminal domain	-
Os03g0806600	157.884	228.762	318.918	69.0602	77.594	82.7652	235.188	76.4731	1.61847	1.64732e-08	4.19235e-07	-	3	33697176	33698442	+	887	protein_coding	-	-
Os10g0542900	1061.44	960.802	1165.13	2033.82	1965.07	3101.37	1062.46	2366.75	-1.15571	1.66689e-08	4.23661e-07	Cht8	10	21205700	21207611	+	1072	protein_coding	PF00182:Chitinase class I	-
Os02g0685200	152.177	100.655	102.719	310.771	244.421	336.64	118.517	297.277	-1.32529	1.69823e-08	4.31055e-07	-	2	28041117	28044149	-	2081	protein_coding	PF00249:Myb-like DNA-binding domain	Myb_DNA-binding
Os01g0854000	339.546	429.056	456.855	1824.34	2631.41	6093.94	408.486	3516.56	-3.10592	1.70397e-08	4.32136e-07	-	1	36794890	36796983	+	2094	protein_coding	PF02458:Transferase family	-
Os05g0551000	442.265	354.836	295.44	856.346	666.338	969.004	364.18	830.563	-1.18918	1.71236e-08	4.33882e-07	-	5	27377539	27382166	+	2691	protein_coding	PF01814:Hemerythrin HHE cation binding domain|PF13639:Ring finger domain|PF05495:CHY zinc finger|PF14599:Zinc-ribbon	zf-CHY
Os02g0437300	413.732	293.833	315.983	650.317	667.308	830.442	341.183	716.022	-1.06948	1.73346e-08	4.38846e-07	-	2	13962353	13967573	-	2598	protein_coding	-	-
Os10g0569400	3132.95	1567.78	1565.24	5833.28	5396.66	8747.07	2088.66	6659	-1.67269	1.75943e-08	4.44644e-07	-	10	22575212	22576531	+	631	protein_coding	-	-
Os06g0595800	7392.96	9000.02	9699.62	3281.51	3570.29	5093.31	8697.53	3981.71	1.12703	1.78959e-08	4.51477e-07	-	6	23438800	23440545	+	1506	protein_coding	PF02458:Transferase family	-
Os03g0365800	1535.09	772.708	1478.18	3528.98	3308.41	3079.05	1261.99	3305.48	-1.38893	1.82893e-08	4.61001e-07	-	3	14289593	14293249	+	1358	protein_coding	PF00657:GDSL-like Lipase/Acylhydrolase	Lipase_GDSL
Os03g0720800	789.42	778.809	888.275	383.284	312.316	483.572	818.835	393.057	1.05821	1.90177e-08	4.77725e-07	-	3	29236187	29238382	+	1505	protein_coding	PF00249:Myb-like DNA-binding domain	Myb_DNA-binding
Os03g0856500	186.417	136.241	252.395	450.042	451.015	548.668	191.684	483.242	-1.33385	1.90187e-08	4.77725e-07	-	3	36132354	36134532	+	1339	protein_coding	PF16321:Sigma 54 modulation/S30EA ribosomal protein C terminus|PF02482:Sigma 54 modulation protein / S30EA ribosomal protein	-
Os09g0464066	63.7243	74.2207	110.545	265.882	186.226	244.576	82.8301	232.228	-1.4865	1.90554e-08	4.78233e-07	-	9	17571821	17572267	+	447	protein_coding	-	-
Os04g0497700	624.878	753.391	945.994	1599.89	1537.33	2277.44	774.754	1804.89	-1.22042	1.97113e-08	4.94267e-07	-	4	24889983	24891483	+	1407	protein_coding	-	-
Os08g0346900	103.671	45.7525	58.6966	184.161	268.669	262.245	69.3733	238.358	-1.77965	2.01621e-08	5.04262e-07	-	8	15736243	15738803	-	636	protein_coding	-	-
Os03g0688300	155.031	142.341	169.242	44.8891	67.8947	68.816	155.538	60.5333	1.35319	2.01856e-08	5.04413e-07	-	3	27467413	27472746	+	2161	protein_coding	PF13499:EF-hand domain pair|PF00069:Protein kinase domain	Pkinase
Os08g0422000	51.3598	41.6856	63.588	124.308	177.496	284.563	52.2111	195.456	-1.90637	2.02202e-08	5.04843e-07	-	8	20208860	20218785	+	2177	protein_coding	-	-
Os01g0609200	61.822	36.602	79.2404	9.20803	9.69925	11.1594	59.2215	10.0222	2.55942	2.06362e-08	5.14343e-07	-	1	24065207	24073621	-	4395	protein_coding	PF00005:ABC transporter|PF14510:ABC-transporter extracellular N-terminal|PF01061:ABC-2 type transporter|PF08370:Plant PDR ABC transporter associated	ABC_tran
Os03g0765900	65.6265	89.4715	45.979	162.291	262.85	427.775	67.0257	284.305	-2.08732	2.07861e-08	5.17391e-07	-	3	31725194	31725857	+	581	protein_coding	PF08041:PetM family of cytochrome b6f complex subunit 7	-
Os01g0512700	60.8709	135.224	163.372	20.7181	24.2481	28.8283	119.822	24.5982	2.27854	2.07942e-08	5.17391e-07	-	1	18073579	18074311	+	733	protein_coding	-	-
Os02g0114300	1533.19	1475.26	2200.14	900.085	795.338	656.542	1736.2	783.988	1.14772	2.0843e-08	5.18162e-07	-	2	775715	776637	+	923	protein_coding	PF01553:Acyltransferase	Acyltransferase
Os09g0417600	616.318	490.06	625.119	1030.15	1170.7	1593.93	577.166	1264.92	-1.13236	2.13329e-08	5.29432e-07	-	9	14976197	14977729	-	1414	protein_coding	PF03106:WRKY DNA -binding domain	WRKY
Os10g0522601	1439.98	1988.71	1902.75	889.725	999.022	747.676	1777.14	878.808	1.01602	2.14276e-08	5.31327e-07	-	10	20263310	20267568	+	2135	protein_coding	-	-
Os01g0956075	230.168	224.695	311.092	72.5132	96.9925	120.893	255.319	96.7995	1.39367	2.15618e-08	5.34198e-07	-	1	42122517	42123788	-	1272	protein_coding	-	-
Os10g0200700	469.847	800.16	686.75	248.617	237.632	313.392	652.253	266.547	1.28984	2.15985e-08	5.34651e-07	-	10	7114764	7116090	-	1327	protein_coding	-	-
Os03g0286200	81.7953	114.89	87.0666	191.067	231.812	277.124	94.5838	233.334	-1.30644	2.19434e-08	5.42725e-07	-	3	9863844	9868646	+	1914	protein_coding	PF00800:Prephenate dehydratase	-
Os01g0963600	2163.77	2879.36	1766.77	474.213	656.639	1058.28	2269.96	729.71	1.63637	2.208e-08	5.45174e-07	-	1	42460555	42461946	+	952	protein_coding	PF02496:ABA/WDS induced protein	-
Os05g0372900	15.2177	52.8695	21.5221	185.312	149.368	118.103	29.8698	150.928	-2.34067	2.2107e-08	5.45374e-07	-	5	17962057	17964229	-	1030	protein_coding	-	-
Os02g0555200	227.315	156.575	217.177	82.8722	88.2631	79.9753	200.356	83.7036	1.26009	2.22743e-08	5.49035e-07	-	2	20969986	20977618	-	2231	protein_coding	-	-
Os10g0413400	213.048	405.672	495.986	127.761	108.632	108.804	371.569	115.066	1.69219	2.23213e-08	5.49727e-07	-	10	14423961	14428117	+	1995	protein_coding	PF12710:haloacid dehalogenase-like hydrolase	-
Os05g0198200	2028.71	2600.77	3008.2	1406.53	964.105	934.596	2545.9	1101.74	1.20907	2.23799e-08	5.50702e-07	-	5	6085887	6087017	+	1004	protein_coding	PF00462:Glutaredoxin	-
Os05g0135000	303.404	185.043	288.592	511.045	729.383	671.421	259.013	637.283	-1.29894	2.29109e-08	5.62813e-07	-	5	2050494	2052107	+	1275	protein_coding	PF00141:Peroxidase	-
Os07g0628500	700.016	588.682	870.666	291.204	295.827	389.647	719.788	325.559	1.14351	2.30206e-08	5.65028e-07	-	7	26039699	26042226	-	1227	protein_coding	-	-
Os04g0508500	426.096	325.351	312.07	70.2112	84.3834	162.741	354.506	105.778	1.73988	2.33515e-08	5.72665e-07	-	4	25405125	25407689	-	1372	protein_coding	PF00249:Myb-like DNA-binding domain	Myb_DNA-binding
Os08g0466200	205.439	172.843	162.394	20.7181	27.1579	68.816	180.225	38.8973	2.20073	2.34842e-08	5.75433e-07	-	8	22904756	22908287	+	2579	protein_coding	PF02705:K+ potassium transporter	K_trans
Os03g0592500	1063.34	1464.08	950.885	2351.5	3627.52	6641.67	1159.43	4206.9	-1.85955	2.35932e-08	5.77615e-07	-	3	22000043	22001240	+	1109	protein_coding	PF00504:Chlorophyll A-B binding protein	-
Os01g0607200	538.327	787.959	562.509	271.637	322.015	224.117	629.599	272.59	1.20772	2.38868e-08	5.84309e-07	-	1	23923718	23933449	+	2490	protein_coding	PF13520:Amino acid permease	-
Os04g0679400	494.576	417.873	661.315	1514.72	1483.01	955.984	524.588	1317.91	-1.32851	2.39807e-08	5.86113e-07	-	4	34694367	34696099	-	1633	protein_coding	PF12481:Aluminium induced protein	-
Os08g0170800	150.275	137.257	167.285	306.167	269.639	344.08	151.606	306.629	-1.01612	2.47242e-08	6.03774e-07	-	8	4147266	4149998	-	1837	protein_coding	-	-
Os02g0261000	556.398	764.575	774.795	283.147	357.902	358.959	698.589	333.336	1.06562	2.50614e-08	6.11493e-07	-	2	9106619	9107664	+	1046	protein_coding	-	-
Os02g0666500	361.421	415.839	597.727	208.332	186.226	189.709	458.329	194.755	1.23556	2.55763e-08	6.22485e-07	-	2	27063117	27065233	-	2117	protein_coding	PF00067:Cytochrome P450	p450
Os11g0453900	4.75554	10.1672	17.609	50.6441	76.624	62.3064	10.8439	63.1915	-2.54829	2.56085e-08	6.22745e-07	-	11	15320288	15321526	-	852	protein_coding	PF00257:Dehydrin	-
Os02g0151300	544.985	594.782	644.684	208.332	249.271	342.22	594.817	266.607	1.15483	2.62161e-08	6.36986e-07	-	2	2824488	2830257	-	2062	protein_coding	PF00759:Glycosyl hydrolase family 9	-
Os11g0459600	74.1864	29.4849	60.6532	256.674	192.045	159.021	54.7748	202.58	-1.88245	2.77607e-08	6.7339e-07	-	11	15609503	15637145	+	576	protein_coding	-	-
Os04g0613200	1574.08	2495.03	2044.6	1032.45	1015.51	945.755	2037.91	997.905	1.03013	2.87364e-08	6.96472e-07	-	4	31089267	31092608	+	1632	protein_coding	-	-
Os06g0147200	136.008	98.622	116.415	244.013	290.007	232.486	117.015	255.502	-1.1256	2.88464e-08	6.98556e-07	-	6	2461058	2461867	+	615	protein_coding	-	-
Os05g0574400	4049.82	5849.2	3895.5	10127.7	10121.2	8367.65	4598.17	9538.83	-1.05278	2.9247e-08	7.07076e-07	-	5	28617700	28621468	-	1299	protein_coding	PF00056:lactate/malate dehydrogenase, NAD binding domain|PF02866:lactate/malate dehydrogenase, alpha/beta C-terminal domain	-
Os09g0511300	302.452	200.294	221.091	88.6272	64.9849	108.804	241.279	87.472	1.4636	2.92762e-08	7.07191e-07	-	9	19874674	19875632	+	959	protein_coding	-	-
Os06g0112300	19.9733	24.4013	22.5004	74.8152	66.9248	75.3256	22.2917	72.3552	-1.69973	2.95438e-08	7.1306e-07	-	6	696034	698216	+	799	protein_coding	PF02362:B3 DNA binding domain	B3
Os05g0582350	120.791	104.722	99.7842	222.144	216.293	297.583	108.432	245.34	-1.17909	2.99791e-08	7.22965e-07	-	5	28987092	28987648	-	557	protein_coding	PF00348:Polyprenyl synthetase	-
Os04g0664500	13.3155	9.15049	17.609	42.5871	79.5338	99.5042	13.3583	73.875	-2.47002	3.0243e-08	7.28117e-07	-	4	33925445	33927123	+	1679	protein_coding	PF02458:Transferase family	-
Os02g0587800	2.85332	6.10033	7.82622	35.6811	63.0451	36.2679	5.59329	44.998	-3.0154	3.19709e-08	7.68441e-07	-	2	22650959	22651932	+	766	protein_coding	-	-
Os09g0519200	208.293	270.448	258.265	526.008	532.489	417.546	245.669	492.014	-1.00183	3.21684e-08	7.72548e-07	-	9	20273778	20274376	-	599	protein_coding	-	-
Os06g0293500	1890.8	1588.12	2485.8	864.403	800.188	1069.44	1988.24	911.343	1.12519	3.23685e-08	7.75958e-07	-	6	10780823	10784833	-	2836	protein_coding	PF13962:Domain of unknown function	-
Os03g0129300	176.906	237.913	152.611	832.175	1348.2	2995.36	189.143	1725.24	-3.18951	3.23829e-08	7.75958e-07	-	3	1662306	1665491	+	1669	protein_coding	PF02672:CP12 domain|PF02800:Glyceraldehyde 3-phosphate dehydrogenase, C-terminal domain	-
Os06g0712700	388.052	458.541	534.139	240.56	167.797	222.257	460.244	210.205	1.13216	3.23907e-08	7.75958e-07	-	6	30173627	30177996	-	1207	protein_coding	PF01486:K-box region|PF00319:SRF-type transcription factor (DNA-binding and dimerisation domain)	K-box
Os11g0499600	1549.36	1527.12	2316.56	915.048	729.383	848.111	1797.68	830.847	1.11384	3.27053e-08	7.82303e-07	-	11	17785138	17792540	+	1625	protein_coding	PF00106:short chain dehydrogenase	adh_short
novel.510	132.204	116.923	151.633	62.1542	48.4962	46.4973	133.587	52.3826	1.35799	3.43846e-08	8.1966e-07	-	11	19158326	19161182	+	824	-	-	-
Os02g0518600	42.7999	44.7357	66.5228	12.661	6.78947	8.36951	51.3528	9.27334	2.48774	3.44696e-08	8.20854e-07	-	2	18845552	18851842	-	2581	protein_coding	PF02705:K+ potassium transporter	K_trans
Os02g0828200	19.0222	17.2843	20.5438	70.2112	56.2556	95.7844	18.9501	74.0837	-1.96807	3.45377e-08	8.20854e-07	-	2	35584962	35589241	+	1515	protein_coding	-	-
Os12g0610100	5.70665	4.06689	8.80449	55.2482	59.1654	28.8283	6.19268	47.7473	-2.94045	3.45412e-08	8.20854e-07	-	12	25764900	25765722	+	823	protein_coding	-	-
Os11g0127800	9.51108	3.05016	3.91311	35.6811	39.7669	84.6251	5.49145	53.3577	-3.27507	3.57048e-08	8.46549e-07	-	11	1280059	1281690	+	1051	protein_coding	PF00498:FHA domain	FHA
Os11g0184800	73.2353	31.5184	48.9138	158.838	154.218	171.11	51.2225	161.389	-1.65249	3.5717e-08	8.46549e-07	-	11	4295162	4297455	+	1463	protein_coding	PF14543:Xylanase inhibitor N-terminal|PF14541:Xylanase inhibitor C-terminal	-
Os12g0291100	107.475	115.906	61.6314	216.389	371.481	640.733	95.0043	409.534	-2.10939	3.6528e-08	8.64356e-07	-	12	11262587	11263636	+	939	protein_coding	-	-
Os10g0509401	816.051	976.053	1368.61	2621.99	2115.41	2256.05	1053.57	2331.15	-1.14564	3.73503e-08	8.82374e-07	-	10	19568799	19569328	-	530	protein_coding	-	-
novel.1777	340.497	366.02	312.07	120.855	185.256	165.53	339.529	157.214	1.10639	3.77157e-08	8.89558e-07	-	6	24404351	24406047	+	1595	-	PF02347:Glycine cleavage system P-protein	-
Os04g0589400	197.831	262.314	188.807	72.5132	85.3534	105.084	216.317	87.6501	1.29784	3.85149e-08	9.07667e-07	-	4	29795103	29797235	+	2133	protein_coding	-	-
Os07g0448600	2003.99	1407.14	1403.83	4110.23	3189.11	2984.2	1604.98	3427.85	-1.09442	4.00538e-08	9.41638e-07	-	7	15377040	15378085	-	817	protein_coding	PF00230:Major intrinsic protein	-
Os02g0711400	681.945	519.545	493.052	1594.14	982.534	1304.71	564.847	1293.8	-1.195	4.02746e-08	9.46061e-07	-	2	29471779	29472570	-	792	protein_coding	-	-
Os02g0758800	593.492	849.979	886.319	244.013	195.925	386.857	776.597	275.598	1.4933	4.04778e-08	9.50064e-07	-	2	31951933	31953098	-	1051	protein_coding	PF02298:Plastocyanin-like domain	Cu_bind_like
Os04g0368800	930.184	901.832	1153.39	380.982	429.677	582.146	995.135	464.268	1.09847	4.05129e-08	9.5012e-07	-	4	17906318	17909802	-	2367	protein_coding	PF07645:Calcium-binding EGF domain|PF13947:Wall-associated receptor kinase galacturonan-binding|PF00069:Protein kinase domain	EGF_CA
Os03g0196400	307.208	381.271	511.639	146.177	152.278	191.569	400.039	163.341	1.29029	4.07668e-08	9.54529e-07	-	3	5034168	5040417	+	1217	protein_coding	PF04535:Domain of unknown function (DUF588)	-
Os11g0474100	273.919	227.746	346.31	557.086	551.887	623.994	282.658	577.655	-1.03105	4.09163e-08	9.57257e-07	-	11	16366474	16367249	-	776	protein_coding	-	-
Os05g0406300	223.51	226.729	307.179	54.0972	100.872	105.084	252.473	86.6844	1.53541	4.09632e-08	9.57581e-07	-	5	19795128	19805706	+	2639	protein_coding	PF01156:Inosine-uridine preferring nucleoside hydrolase	-
Os07g0127600	109.377	119.973	129.133	222.144	271.579	231.557	119.494	241.76	-1.01811	4.21701e-08	9.83415e-07	-	7	1437292	1438147	+	856	protein_coding	PF00188:Cysteine-rich secretory protein family	SCP
Os01g0135600	123.644	113.873	135.98	253.221	242.481	353.379	124.499	283.027	-1.18603	4.27233e-08	9.94715e-07	-	1	1928167	1930288	+	1951	protein_coding	-	-
Os03g0624300	3.80443	1.01672	0.978277	61.0032	44.6165	18.5989	1.93314	41.4062	-4.39975	4.4249e-08	1.02776e-06	-	3	23715220	23715752	+	533	protein_coding	-	-
Os03g0416500	72.2842	36.602	52.827	211.785	129.97	179.48	53.9044	173.745	-1.68422	4.44464e-08	1.03152e-06	-	3	17288084	17292842	-	3206	protein_coding	PF01182:Glucosamine-6-phosphate isomerases/6-phosphogluconolactonase	-
Os01g0740651	67.5287	54.903	64.5663	20.7181	14.5489	9.29946	62.3326	14.8555	2.09075	4.5206e-08	1.04747e-06	-	1	30933645	30935642	+	1651	protein_coding	-	-
Os10g0165300	265.359	733.056	395.224	123.157	138.699	129.262	464.546	130.373	1.83231	4.68587e-08	1.08317e-06	-	10	4497746	4503667	+	1936	protein_coding	PF00067:Cytochrome P450	p450
Os01g0128200	63.7243	53.8862	66.5228	18.4161	17.4586	13.0192	61.3778	16.298	1.9219	4.76972e-08	1.1008e-06	-	1	1566147	1569467	+	1290	protein_coding	PF02265:S1/P1 Nuclease	-
Os11g0546600	94.1597	180.976	135.98	44.8891	21.3383	39.9877	137.039	35.405	1.9572	4.85158e-08	1.1188e-06	-	11	20174656	20176341	-	673	protein_coding	-	-
Os01g0878400	16.1688	9.15049	17.609	54.0972	57.2255	93.9245	14.3094	68.4157	-2.25733	4.90251e-08	1.12964e-06	-	1	38118010	38120760	-	1760	protein_coding	PF01490:Transmembrane amino acid transporter protein	Aa_trans
Os05g0401100	18.0711	14.2341	25.4352	61.0032	71.7744	105.084	19.2468	79.2872	-2.04477	4.91731e-08	1.13125e-06	-	5	19507539	19508996	-	1264	protein_coding	PF04536:TPM domain	-
Os06g0583900	97.013	86.4213	144.785	40.2851	27.1579	30.6882	109.406	32.7104	1.74972	5.02991e-08	1.15533e-06	-	6	22821117	22823386	+	2075	protein_coding	PF00544:Pectate lyase|PF04431:Pectate lyase, N terminus	-
Os02g0671800	40.8977	92.5217	62.6097	174.952	209.504	207.378	65.343	197.278	-1.59796	5.06714e-08	1.16295e-06	-	2	27297098	27300008	-	2911	protein_coding	PF13976:GAG-pre-integrase domain|PF14223:gag-polypeptide of LTR copia-type	-
Os04g0304200	554.496	453.458	630.01	1056.62	1298.73	2182.58	545.988	1512.64	-1.47046	5.11049e-08	1.17198e-06	-	4	13641661	13654849	-	2789	protein_coding	PF13426:PAS domain|PF00069:Protein kinase domain	Pkinase
Os03g0558700	160.737	167.759	214.243	77.1172	86.3233	73.4657	180.913	78.9687	1.19573	5.13706e-08	1.17621e-06	-	3	19925378	19926319	-	942	protein_coding	-	-
Os07g0558400	447.972	548.013	404.028	887.423	1393.78	2485.75	466.671	1588.98	-1.76814	5.15664e-08	1.17976e-06	-	7	22316343	22317935	-	1221	protein_coding	PF00504:Chlorophyll A-B binding protein	-
Os08g0531100	1074.75	1114.33	1151.43	514.498	378.271	651.892	1113.5	514.887	1.11243	5.2005e-08	1.18881e-06	-	8	26448418	26452961	+	2192	protein_coding	PF03999:Microtubule associated protein (MAP65/ASE1 family)	-
Os01g0383100	154.08	119.973	166.307	295.808	292.917	398.017	146.787	328.914	-1.16445	5.25139e-08	1.1986e-06	-	1	16000688	16003329	-	2326	protein_coding	PF03081:Exo70 exocyst complex subunit	Exo70
Os09g0481200	444.168	551.063	395.224	852.893	1199.8	1822.69	463.485	1291.79	-1.47949	5.32494e-08	1.21443e-06	-	9	18469730	18470397	+	668	protein_coding	PF01241:Photosystem I psaG / psaK	-
Os03g0786100	52.311	67.1036	28.37	132.365	192.045	321.761	49.2615	215.391	-2.13135	5.49503e-08	1.25224e-06	-	3	32628790	32632431	+	1586	protein_coding	PF01070:FMN-dependent dehydrogenase	FMN_dh
Os02g0738600	291.039	337.552	359.028	139.271	156.158	188.779	329.206	161.403	1.02467	5.59264e-08	1.27348e-06	-	2	30839199	30842589	+	1978	protein_coding	PF00759:Glycosyl hydrolase family 9	-
Os08g0183900	3.80443	6.10033	0.978277	27.6241	35.8872	53.9369	3.62768	39.1494	-3.4447	5.68963e-08	1.29455e-06	-	8	4897613	4900341	-	1879	protein_coding	-	-
Os05g0325200	330.986	234.863	224.025	92.0803	97.9624	129.262	263.291	106.435	1.30389	5.75699e-08	1.30885e-06	-	5	15084916	15086140	+	1225	protein_coding	PF08613:Cyclin	-
EPlOSAG00000008086	11.4133	12.2007	17.609	75.9662	60.1353	46.4973	13.741	60.8663	-2.14224	5.77863e-08	1.31274e-06	-	11	701654	701729	+	76	ncRNA	-	-
Os08g0435900	482.212	595.799	360.984	980.655	1367.59	2447.62	479.665	1598.62	-1.73723	5.787e-08	1.31361e-06	-	8	21171332	21172654	-	1138	protein_coding	PF00504:Chlorophyll A-B binding protein	-
Os12g0190200	93.2086	74.2207	87.0666	174.952	183.316	253.875	84.832	204.048	-1.26754	5.9062e-08	1.33857e-06	-	12	4556144	4558043	-	1064	protein_coding	PF01789:PsbP	-
Os03g0841900	116.035	103.706	89.0232	194.52	273.519	360.819	102.921	276.286	-1.42676	6.0786e-08	1.37549e-06	-	3	35393753	35398295	-	1951	protein_coding	PF01593:Flavin containing amine oxidoreductase	Amino_oxidase
Os07g0141400	214.95	275.532	139.894	443.136	707.075	1076.88	210.125	742.363	-1.82192	6.15532e-08	1.39176e-06	-	7	2136871	2138335	-	1119	protein_coding	PF01789:PsbP	-
Os08g0140300	58.0176	29.4849	42.0659	138.12	114.451	212.028	43.1895	154.866	-1.84107	6.17428e-08	1.39496e-06	-	8	2256007	2257872	+	1866	protein_coding	PF00282:Pyridoxal-dependent decarboxylase conserved domain	-
Os01g0138500	86.5509	74.2207	83.1535	643.411	284.188	179.48	81.3084	369.026	-2.18021	6.54791e-08	1.47364e-06	-	1	2059309	2062226	+	1430	protein_coding	PF05623:Protein of unknown function (DUF789)	-
Os01g0138900	683.847	1152.96	802.187	1865.78	1957.31	1805.02	879.665	1876.04	-1.09299	6.72175e-08	1.51041e-06	-	1	2074795	2077903	-	1704	protein_coding	PF13378:Enolase C-terminal domain-like|PF02746:Mandelate racemase / muconate lactonizing enzyme, N-terminal domain	MR_MLE_N
Os05g0137500	361.421	219.612	343.375	122.006	98.9323	140.422	308.136	120.453	1.35529	6.74434e-08	1.51432e-06	-	5	2179520	2184898	-	1425	protein_coding	PF03106:WRKY DNA -binding domain	WRKY
Os02g0197600	466.994	506.327	353.158	833.326	1329.77	2283.95	442.16	1482.35	-1.74574	6.81832e-08	1.52974e-06	-	2	5468648	5470490	-	1198	protein_coding	PF00504:Chlorophyll A-B binding protein	-
Os02g0203000	711.429	782.876	1047.73	1766.79	1476.23	1858.96	847.346	1700.66	-1.00507	6.84209e-08	1.53389e-06	-	2	5760788	5763128	-	672	protein_coding	PF00170:bZIP transcription factor	bZIP_1
Os12g0281600	135.057	115.906	134.024	37.9831	32.0075	60.4465	128.329	43.479	1.5556	7.33285e-08	1.63757e-06	-	12	10624037	10635373	+	3915	protein_coding	PF00931:NB-ARC domain	NB-ARC
Os01g0869800	262.506	313.15	273.918	527.159	1015.51	2066.34	283.191	1203	-2.08737	7.38252e-08	1.6474e-06	-	1	37697024	37699582	+	1064	protein_coding	PF00504:Chlorophyll A-B binding protein	-
Os04g0521900	131.253	264.348	156.524	47.1911	45.5865	68.816	184.042	53.8645	1.76821	7.45759e-08	1.66287e-06	-	4	26118248	26119023	-	776	protein_coding	-	-
Os09g0461700	519.305	682.22	671.098	366.019	258.97	277.124	624.208	300.704	1.0558	7.63381e-08	1.69955e-06	-	9	17458996	17460307	+	1312	protein_coding	PF07859:alpha/beta hydrolase fold	Abhydrolase_3
Os04g0271200	166.444	196.227	172.177	81.7212	84.3834	90.2047	178.283	85.4365	1.05883	7.69367e-08	1.71156e-06	-	4	11336081	11338792	+	934	protein_coding	PF04387:Protein tyrosine phosphatase-like protein, PTPLA	-
Os11g0255500	975.837	542.929	926.428	295.808	258	384.998	815.065	312.935	1.38068	7.76568e-08	1.72626e-06	-	11	8387770	8389759	-	1278	protein_coding	PF16884:N-terminal domain of oxidoreductase|PF00107:Zinc-binding dehydrogenase	ADH_zinc_N
Os06g0562200	370.932	439.224	245.548	852.893	721.624	833.231	351.901	802.583	-1.18962	7.79025e-08	1.73039e-06	-	6	21556404	21557283	+	880	protein_coding	PF10604:Polyketide cyclase / dehydrase and lipid transport	-
Os03g0277600	8.55997	4.06689	0.978277	52.9461	58.1955	27.8984	4.53505	46.3467	-3.34297	8.31306e-08	1.8451e-06	-	3	9421699	9422925	-	1133	protein_coding	PF01657:Salt stress response/antifungal	-
novel.1899	8446.79	13382.1	14188.9	5233.61	5447.1	6092.08	12005.9	5590.93	1.10253	8.38517e-08	1.85969e-06	-	6	28694859	28695948	-	1090	-	PF03360:Glycosyltransferase family 43	-
Os03g0156300	1.90222	3.05016	3.91311	39.1341	28.1278	27.8984	2.95516	31.7201	-3.42327	8.61754e-08	1.90976e-06	-	3	3036386	3037894	+	747	protein_coding	PF01357:Pollen allergen|PF03330:Lytic transglycolase	-
Os01g0892600	128.4	99.6387	127.176	270.486	245.391	442.654	118.405	319.51	-1.43283	8.97804e-08	1.98359e-06	-	1	38812119	38815213	-	1456	protein_coding	PF03283:Pectinacetylesterase	-
Os03g0790500	171.199	208.428	186.851	85.1742	84.3834	99.5042	188.826	89.6873	1.0712	9.02474e-08	1.99087e-06	-	3	32851444	32852765	+	1322	protein_coding	PF07859:alpha/beta hydrolase fold	Abhydrolase_3
Os03g0807900	64.6754	43.719	41.0876	115.1	169.737	277.124	49.8273	187.32	-1.91192	9.17863e-08	2.02328e-06	-	3	33771756	33773581	+	1217	protein_coding	PF02341:RbcX protein	-
Os07g0562700	699.065	854.046	650.554	1416.88	1878.74	3596.1	734.555	2297.24	-1.64532	9.36982e-08	2.06229e-06	-	7	22487434	22488617	+	1032	protein_coding	PF00504:Chlorophyll A-B binding protein	-
Os10g0474800	70.382	68.1203	84.1318	26.4731	15.5188	24.1786	74.2114	22.0568	1.75769	9.64341e-08	2.11607e-06	-	10	17673233	17674321	-	1089	protein_coding	PF05199:GMC oxidoreductase|PF00732:GMC oxidoreductase	-
Os02g0226200	309.11	534.795	452.942	211.785	147.429	136.702	432.283	165.305	1.38973	9.99033e-08	2.18889e-06	-	2	7078703	7079848	+	1057	protein_coding	PF06888:Putative Phosphatase	-
Os07g0104500	11343.9	6599.54	11307.9	24872	23878.6	18901.1	9750.44	22550.6	-1.20959	1.00948e-07	2.2101e-06	-	7	259712	262742	+	1461	protein_coding	PF00141:Peroxidase	-
Os10g0521500	118.889	93.5384	144.785	48.3421	30.0677	41.8476	119.071	40.0858	1.57702	1.02834e-07	2.24901e-06	-	10	20181672	20185391	+	1511	protein_coding	PF12697:Alpha/beta hydrolase family	-
Os03g0252900	649.607	621.217	524.356	193.369	152.278	320.831	598.393	222.159	1.42784	1.0288e-07	2.24901e-06	-	3	8061598	8061988	-	391	protein_coding	-	-
Os11g0115100	1246.9	2076.15	857.949	4968.88	6385.01	3033.48	1393.67	4795.79	-1.78295	1.07036e-07	2.33633e-06	LTP110-A	11	684777	685551	+	685	protein_coding	PF00234:Protease inhibitor/seed storage/LTP family	-
Os01g0104200	644.851	353.819	597.727	171.499	243.451	203.658	532.133	206.203	1.36668	1.07749e-07	2.35012e-06	-	1	216212	217345	+	1020	protein_coding	PF02365:No apical meristem (NAM) protein	NAM
novel.2226	71.3331	53.8862	33.2614	130.063	193.015	171.11	52.8269	164.729	-1.64151	1.08467e-07	2.364e-06	-	8	15814270	15820737	-	924	-	PF05199:GMC oxidoreductase	-
Os09g0329200	26.631	47.7859	38.1528	1.151	6.78947	1.85989	37.5232	3.26679	3.49142	1.10321e-07	2.40081e-06	-	9	9790649	9792207	-	1559	protein_coding	PF00201:UDP-glucoronosyl and UDP-glucosyl transferase	UDPGT
Os12g0190000	8927.1	8654.33	10927.4	17112	16129.8	24002.8	9502.93	19081.5	-1.00576	1.10943e-07	2.41254e-06	-	12	4533049	4537221	-	2086	protein_coding	-	-
Os04g0475000	50.4087	64.0535	69.4577	135.818	138.699	146.931	61.3066	140.483	-1.19836	1.11761e-07	2.42851e-06	-	4	23769604	23773444	-	3045	protein_coding	PF00069:Protein kinase domain|PF01453:D-mannose binding lectin	Pkinase
Os01g0222600	389.003	254.18	426.529	748.152	791.458	739.307	356.571	759.639	-1.09058	1.12849e-07	2.45031e-06	-	1	6704187	6704746	-	560	protein_coding	-	-
Os03g0816500	1312.53	1572.87	1473.29	542.123	648.88	889.028	1452.89	693.343	1.06603	1.14019e-07	2.47385e-06	-	3	34234446	34238406	+	2725	protein_coding	PF13532:2OG-Fe(II) oxygenase superfamily	-
Os05g0475400	180.711	321.284	252.395	93.2313	111.541	79.0454	251.463	94.606	1.41	1.15074e-07	2.49407e-06	-	5	23356169	23360022	-	1694	protein_coding	PF00202:Aminotransferase class-III	Aminotran_3
Os06g0216200	207.342	197.244	252.395	86.3252	93.1128	118.103	218.994	99.1804	1.13882	1.16218e-07	2.51405e-06	-	6	5913057	5914285	-	1131	protein_coding	PF00724:NADH:flavin oxidoreductase / NADH oxidase family	Oxidored_FMN
Os10g0180800	56.1154	41.6856	31.3049	115.1	132.88	258.525	43.0353	168.835	-1.97348	1.19877e-07	2.58548e-06	-	10	5539743	5544578	-	4753	protein_coding	PF13947:Wall-associated receptor kinase galacturonan-binding|PF00069:Protein kinase domain	Pkinase
Os07g0541200	109.377	159.625	155.546	14.963	41.7068	48.3572	141.516	35.009	2.00086	1.24661e-07	2.68266e-06	-	7	21368384	21374650	-	2101	protein_coding	PF01657:Salt stress response/antifungal|PF07714:Protein tyrosine kinase	Pkinase_Tyr
Os01g0159250	120.791	380.254	273.918	62.1542	44.6165	75.3256	258.321	60.6988	2.08848	1.26525e-07	2.72075e-06	-	1	3097610	3098332	+	390	protein_coding	-	-
Os09g0445600	23.7777	33.5518	9.78277	145.026	108.632	73.4657	22.3708	109.041	-2.28491	1.29671e-07	2.78429e-06	-	9	16618039	16618783	+	745	protein_coding	-	-
Os04g0459500	125.546	131.157	106.632	203.728	497.571	593.305	121.112	431.535	-1.83469	1.30252e-07	2.79469e-06	-	4	22937162	22939010	+	1566	protein_coding	PF02800:Glyceraldehyde 3-phosphate dehydrogenase, C-terminal domain	-
Os07g0294300	117.937	80.321	132.067	269.335	225.992	261.315	110.109	252.214	-1.19377	1.32697e-07	2.84082e-06	-	7	11451121	11451610	+	490	protein_coding	-	-
Os06g0663000	63.7243	71.1705	39.1311	13.812	9.69925	13.9492	58.0086	12.4868	2.21857	1.32947e-07	2.84288e-06	-	6	27335847	27339000	-	1767	protein_coding	PF13855:Leucine rich repeat|PF00069:Protein kinase domain	Pkinase
Os04g0349700	392.808	380.254	539.031	118.553	105.722	220.397	437.364	148.224	1.55833	1.32989e-07	2.84288e-06	-	4	16667270	16670469	-	3200	protein_coding	-	-
Os01g0736551	54.2132	58.9698	46.9573	11.51	8.72932	16.739	53.3801	12.3261	2.10713	1.33428e-07	2.85016e-06	-	1	30727331	30731409	+	3968	protein_coding	PF13639:Ring finger domain	-
Os01g0795000	889.286	660.869	1071.21	363.717	354.022	469.623	873.789	395.787	1.14195	1.35172e-07	2.88529e-06	-	1	33668016	33672415	+	2390	protein_coding	PF05922:Peptidase inhibitor I9|PF00082:Subtilase family	Peptidase_S8
Os11g0549620	219.706	228.762	177.068	551.331	390.88	390.577	208.512	444.262	-1.08968	1.35683e-07	2.89407e-06	-	11	20343336	20349189	-	1321	protein_coding	PF00149:Calcineurin-like phosphoesterase	Metallophos
Os07g0282401	147.422	141.324	211.308	48.3421	48.4962	77.1855	166.685	58.008	1.51751	1.35887e-07	2.89574e-06	-	7	10762643	10763602	+	960	protein_coding	PF02738:Molybdopterin-binding domain of aldehyde dehydrogenase	-
Os01g0355250	175.004	41.6856	118.372	385.586	639.18	470.553	111.687	498.44	-2.15691	1.35961e-07	2.89574e-06	-	1	14280966	14282033	+	435	protein_coding	PF01419:Jacalin-like lectin domain	-
Os09g0456800	225.413	198.261	245.548	118.553	100.872	115.313	223.074	111.58	1.00132	1.36132e-07	2.89725e-06	-	9	17221479	17228923	+	1565	protein_coding	PF00447:HSF-type DNA-binding	HSF_DNA-bind
Os07g0129900	192.124	156.575	248.482	43.7381	68.8646	87.4149	199.06	66.6726	1.57069	1.37011e-07	2.91383e-06	-	7	1583658	1585631	-	1974	protein_coding	PF00139:Legume lectin domain|PF00069:Protein kinase domain	Pkinase
Os01g0802700	1556.01	1124.49	1364.7	648.015	505.331	776.505	1348.4	643.283	1.06768	1.37498e-07	2.92125e-06	-	1	34003692	34006460	-	1735	protein_coding	PF03547:Membrane transport protein	-
Os10g0496900	171.199	163.692	101.741	306.167	481.083	940.175	145.544	575.808	-1.98505	1.37562e-07	2.92125e-06	PORB	10	18900290	18904022	+	2963	protein_coding	PF00106:short chain dehydrogenase	adh_short
Os01g0559600	9375.07	9188.11	13932.6	4913.63	4966.98	6013.96	10831.9	5298.19	1.03166	1.38311e-07	2.93501e-06	-	1	21230393	21234906	+	1935	protein_coding	PF01650:Peptidase C13 family	-
Os11g0177301	139.813	150.475	141.85	67.9092	70.8045	64.1663	144.046	67.6266	1.09114	1.39874e-07	2.966e-06	-	11	3847968	3849051	+	1084	protein_coding	-	-
Os06g0179100	73.2353	138.274	110.545	28.7751	31.0376	37.1978	107.352	32.3368	1.72547	1.4027e-07	2.97223e-06	-	6	3932020	3933032	+	912	protein_coding	-	-
Os09g0505400	552.594	515.478	740.556	168.046	154.218	312.462	602.876	211.575	1.50864	1.45713e-07	3.08305e-06	-	9	19550069	19552454	-	1245	protein_coding	PF03547:Membrane transport protein	-
Os04g0282400	4.75554	7.11705	4.89138	24.1711	78.5639	43.7075	5.58799	48.8141	-3.13537	1.47125e-07	3.11066e-06	-	4	12062977	12063828	-	852	protein_coding	-	-
Os12g0599800	25.6799	62.02	56.7401	6.90602	3.8797	8.36951	48.1467	6.38508	2.9133	1.47659e-07	3.1174e-06	-	12	25234869	25235824	+	956	protein_coding	PF04043:Plant invertase/pectin methylesterase inhibitor	-
Os12g0131701	133.155	143.358	123.263	306.167	223.083	293.863	133.259	274.371	-1.04106	1.48884e-07	3.13413e-06	-	12	1523778	1526548	+	2010	protein_coding	PF00931:NB-ARC domain	NB-ARC
Os09g0266000	51.3598	35.5853	46.9573	103.59	115.421	162.741	44.6341	127.251	-1.51272	1.53752e-07	3.23191e-06	-	9	4988979	4991687	+	1502	protein_coding	PF12680:SnoaL-like domain	-
Os09g0316000	156.933	151.491	223.047	63.3052	44.6165	79.9753	177.157	62.6323	1.49903	1.54249e-07	3.24002e-06	-	9	8726763	8729678	-	1175	protein_coding	PF07847:PCO_ADO	-
Os08g0553800	154.08	169.792	155.546	271.637	352.083	456.603	159.806	360.108	-1.1745	1.55261e-07	3.2589e-06	-	8	27695184	27700281	-	3529	protein_coding	PF05368:NmrA-like family	NmrA
Os04g0414700	175.004	227.746	144.785	348.754	535.398	842.531	182.512	575.561	-1.65843	1.56151e-07	3.27521e-06	-	4	20496054	20497009	+	645	protein_coding	-	-
Os08g0394000	16.1688	33.5518	35.218	111.647	88.2631	88.3449	28.3129	96.0851	-1.76396	1.58824e-07	3.32406e-06	-	8	18691681	18692439	+	759	protein_coding	-	-
Os08g0152366	85.5997	68.1203	75.3273	170.348	190.105	360.819	76.3491	240.424	-1.65643	1.60728e-07	3.35907e-06	-	8	3007271	3008757	-	1487	protein_coding	PF00067:Cytochrome P450	p450
Os07g0282300	552.594	602.916	703.381	232.503	183.316	347.8	619.63	254.539	1.28219	1.61215e-07	3.3668e-06	-	7	10748746	10760846	+	2951	protein_coding	PF01799:[2Fe-2S] binding domain|PF00941:FAD binding domain in molybdopterin dehydrogenase|PF01315:Aldehyde oxidase and xanthine dehydrogenase, a/b hammerhead domain|PF02738:Molybdopterin-binding domain of aldehyde dehydrogenase|PF03450:CO dehydrogenase flavoprotein C-terminal domain	-
Os08g0566600	32.3377	45.7525	33.2614	81.7212	146.459	238.996	37.1172	155.725	-2.07335	1.67712e-07	3.49429e-06	-	8	28377834	28378783	+	760	protein_coding	-	-
Os01g0740300	5.70665	8.13377	4.89138	179.557	36.8571	30.6882	6.24394	82.3673	-3.7192	1.67803e-07	3.49429e-06	-	1	30909430	30916476	+	2194	protein_coding	-	-
Os05g0421450	12.3644	18.301	9.78277	89.7783	56.2556	46.4973	13.4827	64.1771	-2.2485	1.67922e-07	3.49429e-06	-	5	20678141	20678622	-	482	protein_coding	-	-
Os08g0200300	406.123	367.036	278.809	635.354	1114.44	1956.61	350.656	1235.47	-1.81739	1.69345e-07	3.52003e-06	-	8	5806463	5808326	-	710	protein_coding	PF04725:Photosystem II 10 kDa polypeptide PsbR	-
novel.2034	16.1688	1.01672	4.89138	56.3992	55.2857	98.5743	7.35898	70.0864	-3.24055	1.69402e-07	3.52003e-06	-	7	16905174	16911124	-	4771	-	-	-
Os03g0300400	20759.8	23579.8	29311.1	10523.6	10811.7	14970.3	24550.3	12101.9	1.02046	1.73919e-07	3.61132e-06	-	3	10562231	10563277	+	879	protein_coding	PF00407:Pathogenesis-related protein Bet v I family	-
Os09g0361500	245.386	122.007	135.98	415.512	437.436	465.903	167.791	439.617	-1.38861	1.82253e-07	3.77395e-06	-	9	11810070	11815321	+	2171	protein_coding	-	-
Os02g0640800	136.008	135.224	95.8711	246.315	380.21	728.148	122.368	451.558	-1.88497	1.82272e-07	3.77395e-06	-	2	25732975	25736658	+	2939	protein_coding	PF00106:short chain dehydrogenase	adh_short
Os01g0649400	69.4309	65.0702	89.0232	18.4161	21.3383	27.8984	74.5081	22.5509	1.7151	1.91987e-07	3.96094e-06	-	1	26202814	26206936	+	1224	protein_coding	PF00657:GDSL-like Lipase/Acylhydrolase	Lipase_GDSL
Os04g0616282	50.4087	51.8528	58.6966	17.265	6.78947	3.71978	53.6527	9.2581	2.57733	1.92664e-07	3.97209e-06	-	4	31270141	31270896	-	393	protein_coding	-	-
Os01g0930900	78.942	69.1371	78.2622	26.4731	10.6692	24.1786	75.4471	20.4403	1.89353	1.93924e-07	3.99521e-06	-	1	40849226	40850197	+	846	protein_coding	PF13561:Enoyl-(Acyl carrier protein) reductase	-
Os04g0609300	60.8709	57.9531	77.2839	21.8691	11.6391	19.5289	65.3693	17.679	1.89541	1.94466e-07	4.00355e-06	-	4	30860607	30863363	+	1688	protein_coding	PF02458:Transferase family	-
novel.1143	225.413	108.789	62.6097	509.894	418.037	793.244	132.271	573.725	-2.11635	1.97167e-07	4.05485e-06	-	3	25831964	25834051	+	1679	-	PF02458:Transferase family	-
Os03g0571700	50.4087	27.4515	27.3918	2.30201	3.8797	4.64973	35.084	3.61048	3.25859	2.02208e-07	4.14986e-06	-	3	20772675	20782658	-	1395	protein_coding	PF01554:MatE	MatE
Os02g0541500	21.8755	7.11705	27.3918	65.6072	100.872	245.506	18.7948	137.328	-2.86848	2.02289e-07	4.14986e-06	-	2	20118183	20118829	+	647	protein_coding	PF13639:Ring finger domain	-
Os08g0238200	116.986	98.622	115.437	31.0771	28.1278	52.077	110.348	37.094	1.56544	2.08454e-07	4.2733e-06	-	8	8394276	8397823	+	1060	protein_coding	PF01738:Dienelactone hydrolase family	-
Os02g0523100	18.0711	5.08361	3.91311	79.4192	48.4962	58.5866	9.02259	62.1673	-2.77275	2.15295e-07	4.39489e-06	-	2	19084413	19085860	+	1009	protein_coding	PF05553:Cotton fibre expressed protein	-
Os01g0262500	742.816	780.842	1330.46	370.623	450.045	318.971	951.371	379.88	1.32453	2.1661e-07	4.41863e-06	-	1	8883493	8885388	+	865	protein_coding	PF03798:TLC domain	LAG1
Os02g0649300	15.2177	17.2843	19.5655	108.194	39.7669	132.052	17.3558	93.3378	-2.42708	2.22932e-07	4.53802e-06	-	2	26143311	26144729	+	1332	protein_coding	PF02183:Homeobox associated leucine zipper|PF00046:Homeobox domain	HALZ
Os08g0414900	3.80443	2.03344	9.78277	42.5871	49.4662	30.6882	5.20688	40.9138	-2.96829	2.23738e-07	4.55123e-06	-	8	19843567	19844028	+	462	protein_coding	-	-
Os06g0697500	162.64	151.491	184.894	77.1172	82.4436	80.9053	166.342	80.1554	1.05232	2.24658e-07	4.56673e-06	-	6	29180264	29181822	+	1559	protein_coding	PF14363:Domain associated at C-terminal with AAA|PF00004:ATPase family associated with various cellular activities (AAA)	AAA
Os07g0435300	103.671	173.859	112.502	265.882	413.188	738.377	130.011	472.482	-1.86348	2.30947e-07	4.68143e-06	-	7	14533317	14534258	+	509	protein_coding	-	-
Os08g0541400	17.1199	16.2675	15.6524	46.0401	71.7744	151.581	16.3466	89.7986	-2.46189	2.34231e-07	4.74469e-06	-	8	27090851	27093340	+	1136	protein_coding	PF00254:FKBP-type peptidyl-prolyl cis-trans isomerase	FKBP_C
Os12g0640550	149.324	113.873	203.482	305.016	405.428	425.915	155.559	378.787	-1.2845	2.35798e-07	4.76977e-06	-	12	27461619	27464059	-	1172	protein_coding	-	-
Os12g0609500	118.889	167.759	164.351	267.033	337.534	338.5	150.333	314.356	-1.06682	2.4729e-07	4.98484e-06	-	12	25738156	25741105	-	1149	protein_coding	PF00106:short chain dehydrogenase	adh_short
Os11g0683500	14.2666	10.1672	14.6742	37.9831	63.0451	78.1155	13.036	59.7146	-2.19915	2.57088e-07	5.16797e-06	-	11	27648703	27655229	-	3669	protein_coding	PF00232:Glycosyl hydrolase family 1	Glyco_hydro_1
novel.2269	107.475	142.341	107.61	48.3421	51.406	45.5673	119.142	48.4385	1.29783	2.61065e-07	5.24428e-06	-	8	28053251	28056974	-	3724	-	PF04569:Protein of unknown function	-
Os02g0159850	40.8977	22.3679	31.3049	84.0232	91.1729	128.333	31.5235	101.176	-1.68197	2.6244e-07	5.2646e-06	-	2	3233676	3233934	-	259	protein_coding	-	-
Os06g0521500	4981.91	5423.19	6558.37	2132.81	2594.55	3459.4	5654.49	2728.92	1.05077	2.65531e-07	5.31925e-06	-	6	19205574	19207119	-	1375	protein_coding	PF00141:Peroxidase	-
Os09g0110300	1099.48	1027.91	1294.26	505.29	419.007	693.74	1140.55	539.346	1.07985	2.66465e-07	5.33427e-06	-	9	920635	926008	-	1111	protein_coding	PF04199:Putative cyclase	-
Os03g0777000	83.6975	55.9197	80.2187	20.7181	11.6391	25.1085	73.2786	19.1552	1.9369	2.75022e-07	5.49419e-06	-	3	32234319	32236419	+	1404	protein_coding	PF02365:No apical meristem (NAM) protein	NAM
Os12g0458900	25.6799	18.301	25.4352	61.0032	73.7143	85.555	23.1387	73.4242	-1.66733	2.75525e-07	5.50045e-06	-	12	16061381	16061987	+	607	protein_coding	-	-
Os11g0645400	210.195	346.702	166.307	728.585	872.932	499.381	241.068	700.299	-1.53894	2.83431e-07	5.64661e-06	-	11	25617774	25618559	+	786	protein_coding	PF03018:Dirigent-like protein	-
Os01g0249050	122.693	167.759	195.655	74.8152	45.5865	58.5866	162.036	59.6628	1.44685	2.87479e-07	5.71939e-06	-	1	8201959	8202513	+	555	protein_coding	PF01357:Pollen allergen|PF03330:Lytic transglycolase	-
Os01g0275900	1322.04	880.481	1332.41	455.797	506.301	660.262	1178.31	540.786	1.1228	2.95801e-07	5.87689e-06	-	1	9644443	9647828	-	2016	protein_coding	-	-
Os02g0131850	8.55997	7.11705	6.84794	61.0032	41.7068	29.7583	7.50832	44.1561	-2.54726	2.99292e-07	5.94217e-06	-	2	1658840	1659856	+	708	protein_coding	-	-
Os08g0349300	11.4133	9.15049	8.80449	37.9831	42.6767	52.077	9.78943	44.2456	-2.178	3.12886e-07	6.19087e-06	-	8	15888282	15889860	-	469	protein_coding	-	-
Os04g0587400	120.791	136.241	188.807	46.0401	45.5865	68.816	148.613	53.4809	1.46939	3.23542e-07	6.39299e-06	-	4	29660983	29662459	+	1360	protein_coding	PF16913:Purine nucleobase transmembrane transport	-
novel.46	45.6532	84.3879	45.0007	240.56	134.82	184.129	58.3473	186.503	-1.67685	3.27039e-07	6.4533e-06	-	1	12150245	12151441	+	913	-	-	-
Os02g0815700	127.449	104.722	94.8929	203.728	220.173	272.474	109.021	232.125	-1.09148	3.32325e-07	6.54424e-06	-	2	34937314	34941399	+	2087	protein_coding	-	-
Os03g0281900	4488.28	4432.91	7434.9	2619.68	2580	2456.92	5452.03	2552.2	1.09509	3.41549e-07	6.71219e-06	-	3	9654333	9657024	+	2692	protein_coding	PF01061:ABC-2 type transporter|PF00005:ABC transporter	ABC2_membrane
novel.1175	17.1199	7.11705	8.80449	41.4361	53.3458	66.0262	11.0138	53.6027	-2.28012	3.48481e-07	6.82989e-06	-	3	36252184	36253792	+	1609	-	PF04569:Protein of unknown function	-
Os02g0129700	198.782	209.445	146.742	395.945	321.045	430.565	184.989	382.518	-1.04828	3.60664e-07	7.05436e-06	-	2	1551553	1553359	-	1807	protein_coding	-	-
Os11g0118500	98.9153	95.5718	49.8921	203.728	201.744	234.346	81.4597	213.273	-1.38916	3.62931e-07	7.08436e-06	-	11	827666	831777	-	1932	protein_coding	PF03000:NPH3 family	-
Os01g0773700	177.857	223.679	154.568	338.395	534.428	907.627	185.368	593.484	-1.68015	3.64436e-07	7.10896e-06	-	1	32708550	32709283	-	625	protein_coding	PF07123:Photosystem II reaction centre W protein (PsbW)	-
Os03g0293100	22.8266	32.5351	20.5438	56.3992	112.511	143.212	25.3018	104.041	-2.04619	3.73276e-07	7.26673e-06	-	3	10208963	10210224	+	963	protein_coding	-	-
Os03g0323100	4.75554	14.2341	12.7176	40.2851	54.3158	102.294	10.5691	65.6316	-2.64437	3.74362e-07	7.28266e-06	-	3	11710916	11711904	-	989	protein_coding	-	-
Os06g0506200	150.275	177.926	136.959	50.6441	79.5338	63.2363	155.053	64.4714	1.25993	3.74934e-07	7.28432e-06	-	6	18002712	18009339	-	2150	protein_coding	PF03151:Triose-phosphate Transporter family	-
Os04g0653700	13.3155	17.2843	15.6524	47.1911	62.0752	55.7968	15.4174	55.021	-1.84076	3.84165e-07	7.43891e-06	-	4	33347881	33348507	-	627	protein_coding	-	-
novel.429	22.8266	13.2174	15.6524	84.0232	178.466	46.4973	17.2321	102.996	-2.57736	3.84174e-07	7.43891e-06	-	10	16566587	16567915	-	1329	-	-	-
Os05g0427400	9473.99	10586.1	12335.1	3420.78	4148.37	6469.63	10798.4	4679.59	1.2062	3.87e-07	7.48863e-06	-	5	20953643	20955793	-	2151	protein_coding	PF00221:Aromatic amino acid lyase	-
Os06g0188400	220.657	134.207	184.894	367.17	380.21	567.267	179.92	438.216	-1.28441	3.89487e-07	7.53173e-06	-	6	4459007	4463882	+	3336	protein_coding	PF01094:Receptor family ligand binding region	ANF_receptor
Os03g0279950	5.70665	5.08361	3.91311	26.4731	30.0677	70.6759	4.90112	42.4055	-3.11799	3.91514e-07	7.56588e-06	-	3	9555529	9557358	+	997	protein_coding	PF01789:PsbP	-
Os06g0254300	64.6754	134.207	69.4577	200.275	298.737	331.991	89.4468	277.001	-1.63404	3.92212e-07	7.57432e-06	-	6	7983970	7990956	-	2465	protein_coding	PF05042:Caleosin related protein	-
Os05g0579600	47.5554	102.689	56.7401	12.661	15.5188	17.669	68.9948	15.2829	2.16553	4.03126e-07	7.75884e-06	-	5	28845110	28846124	-	682	protein_coding	-	-
Os02g0565600	1335.36	920.133	910.776	462.703	479.143	602.605	1055.42	514.817	1.03511	4.03373e-07	7.75884e-06	-	2	21487610	21489894	-	1358	protein_coding	PF00046:Homeobox domain|PF02183:Homeobox associated leucine zipper	Homeobox
Os12g0290150	234.924	184.027	207.395	391.341	368.571	544.018	208.782	434.644	-1.0583	4.1111e-07	7.90242e-06	-	12	11194132	11205015	-	2330	protein_coding	PF02445:Quinolinate synthetase A protein|PF02657:Fe-S metabolism associated domain	-
Os05g0338900	431.803	755.424	517.508	244.013	277.398	239.926	568.245	253.779	1.16227	4.11438e-07	7.90348e-06	-	5	15867456	15873587	+	1045	protein_coding	PF00854:POT family	-
Os01g0249100	411.83	456.508	606.532	147.328	162.947	268.754	491.623	193.01	1.34608	4.12658e-07	7.91643e-06	-	1	8202020	8202772	-	655	protein_coding	PF01357:Pollen allergen|PF03330:Lytic transglycolase	-
Os05g0331200	63.7243	118.956	55.7618	19.5671	20.3684	18.5989	79.4808	19.5115	2.02519	4.18917e-07	8.02057e-06	-	5	15482327	15488104	-	2050	protein_coding	PF07992:Pyridine nucleotide-disulphide oxidoreductase	Pyr_redox_2
Os03g0731100	18.0711	18.301	15.6524	49.4931	58.1955	88.3449	17.3415	65.3445	-1.91912	4.22419e-07	8.07695e-06	-	3	29931433	29932639	+	578	protein_coding	PF05479:Photosystem I reaction centre subunit N (PSAN or PSI-N)	-
Os04g0545400	354.763	470.742	549.792	249.768	195.925	212.958	458.432	219.55	1.06362	4.25338e-07	8.12205e-06	-	4	27328757	27329428	-	571	protein_coding	PF02298:Plastocyanin-like domain	Cu_bind_like
Os10g0502300	71.3331	50.8361	93.9146	18.4161	11.6391	23.2486	72.0279	17.7679	2.01875	4.26511e-07	8.13909e-06	-	10	19156045	19156747	-	703	protein_coding	-	-
Os01g0734000	1367.69	924.2	1808.83	538.67	612.022	628.643	1366.91	593.112	1.20428	4.27617e-07	8.15482e-06	-	1	30604326	30608077	+	1124	protein_coding	PF03106:WRKY DNA -binding domain	WRKY
Os10g0352000	303.404	257.231	381.528	142.724	149.368	166.46	314.054	152.851	1.0377	4.28214e-07	8.16085e-06	-	10	10748919	10751558	-	757	protein_coding	PF14009:Domain of unknown function (DUF4228)	-
Os03g0649000	135.057	90.4882	106.632	338.395	208.534	257.595	110.726	268.175	-1.27299	4.30587e-07	8.20067e-06	-	3	25147591	25151544	-	3008	protein_coding	PF10358:N-terminal C2 in EEIG1 and EHBP1 proteins	-
Os01g0585300	444.168	356.869	389.354	680.243	751.692	1113.15	396.797	848.36	-1.09685	4.32557e-07	8.23278e-06	-	1	22754546	22755398	-	754	protein_coding	PF06549:Protein of unknown function (DUF1118)	-
Os04g0509600	1414.3	1589.14	1716.88	590.465	611.052	985.743	1573.44	729.087	1.10882	4.36989e-07	8.30624e-06	-	4	25500515	25502557	+	2043	protein_coding	PF00909:Ammonium Transporter Family	Ammonium_transp
Os01g0920450	312.915	262.314	384.463	168.046	146.459	161.811	319.897	158.772	1.01195	4.38157e-07	8.32298e-06	-	1	40193003	40193251	+	249	protein_coding	-	-
novel.2123	17.1199	12.2007	22.5004	58.7012	62.0752	58.5866	17.2737	59.7876	-1.78881	4.44922e-07	8.43772e-06	-	8	14618286	14638989	+	937	-	-	-
Os05g0481900	113.182	102.689	111.524	51.7951	46.5564	44.6374	109.131	47.663	1.19938	4.45071e-07	8.43772e-06	-	5	23697741	23700670	-	1741	protein_coding	PF03547:Membrane transport protein	-
Os06g0147000	214.95	210.461	271.961	633.052	511.15	384.068	232.458	509.423	-1.13036	4.52225e-07	8.56331e-06	-	6	2453481	2454046	-	566	protein_coding	-	-
Os08g0372900	90.3553	62.02	89.0232	28.7751	21.3383	28.8283	80.4662	26.3139	1.61632	4.52286e-07	8.56331e-06	-	8	17439595	17443724	-	1383	protein_coding	-	-
Os06g0287700	349.057	269.431	280.765	549.029	580.985	920.646	299.751	683.553	-1.18985	4.57271e-07	8.65203e-06	-	6	10445137	10451095	+	4103	protein_coding	-	-
Os11g0670900	1013.88	922.166	1146.54	408.606	445.195	648.172	1027.53	500.658	1.03595	4.63105e-07	8.75099e-06	-	11	27111943	27112811	+	869	protein_coding	-	-
Os01g0621200	92.2575	128.107	193.699	41.4361	32.9774	51.147	138.021	41.8535	1.71982	4.63543e-07	8.75356e-06	-	1	24753864	24758578	-	1506	protein_coding	PF01490:Transmembrane amino acid transporter protein	Aa_trans
Os07g0100200	769.447	840.829	727.838	1296.03	1392.81	2089.59	779.371	1592.81	-1.03173	4.70917e-07	8.87547e-06	-	7	11648	12983	-	1336	protein_coding	PF01680:SOR/SNZ family	-
Os12g0169600	15.2177	37.6187	13.6959	71.3622	118.331	95.7844	22.1774	95.1591	-2.10865	4.9929e-07	9.3919e-06	-	12	3542861	3544916	+	1546	protein_coding	PF00274:Fructose-bisphosphate aldolase class-I	-
Os09g0556400	213.999	160.642	249.461	428.173	376.331	496.591	208.034	433.698	-1.05951	5.08334e-07	9.54963e-06	-	9	22107352	22111209	-	1435	protein_coding	PF07690:Major Facilitator Superfamily	MFS_1
Os08g0205000	91.3064	103.706	115.437	39.1341	35.8872	48.3572	103.483	41.1262	1.32772	5.16952e-07	9.69895e-06	-	8	6121845	6123652	-	1314	protein_coding	PF02458:Transferase family	-
Os02g0114400	1439.03	1386.81	2389.93	894.33	691.556	703.039	1738.59	762.975	1.18876	5.22016e-07	9.78763e-06	-	2	777582	778268	-	687	protein_coding	PF12710:haloacid dehalogenase-like hydrolase	-
Os03g0343900	59.9198	84.3879	52.827	133.516	188.165	277.124	65.7116	199.602	-1.60676	5.2347e-07	9.80854e-06	-	3	12812218	12812882	+	665	protein_coding	PF06596:Photosystem II reaction centre X protein (PsbX)	-
Os04g0583900	181.662	151.491	152.611	615.787	372.451	294.793	161.921	427.677	-1.39902	5.37243e-07	1.00536e-05	-	4	29500955	29503774	-	2013	protein_coding	PF00249:Myb-like DNA-binding domain	Myb_DNA-binding
Os02g0593500	19.9733	20.3344	34.2397	71.3622	79.5338	155.301	24.8491	102.066	-2.04138	5.38738e-07	1.00751e-05	-	2	22971895	22975181	+	2162	protein_coding	PF01384:Phosphate transporter family	-
Os04g0142400	74.1864	38.6354	60.6532	172.65	141.609	372.908	57.825	229.056	-1.98588	5.39147e-07	1.00762e-05	-	4	2889775	2891435	-	1005	protein_coding	-	-
Os07g0561500	49.4576	62.02	98.806	149.63	222.113	281.774	70.0945	217.839	-1.63827	5.4124e-07	1.00971e-05	-	7	22416201	22417146	+	946	protein_coding	PF13561:Enoyl-(Acyl carrier protein) reductase	-
Os01g0702700	391.857	514.461	500.878	158.838	149.368	269.684	469.065	192.63	1.28133	5.41308e-07	1.00971e-05	-	1	29132173	29133909	-	1513	protein_coding	PF00249:Myb-like DNA-binding domain	Myb_DNA-binding
Os01g0915401	28.5332	23.3846	42.0659	90.9293	80.5037	129.262	31.3279	100.232	-1.67855	5.49239e-07	1.02319e-05	-	1	39878959	39879405	+	447	protein_coding	PF16845:Aspartic acid proteinase inhibitor	-
Os10g0550900	2030.62	2052.76	3097.22	1050.87	1335.59	1163.36	2393.53	1183.27	1.0161	5.50005e-07	1.02396e-05	-	10	21618211	21620554	+	1781	protein_coding	PF01619:Proline dehydrogenase	-
Os01g0192300	595.394	483.959	778.708	226.748	265.759	339.43	619.354	277.312	1.15758	6.03737e-07	1.12183e-05	-	1	4971466	4973555	-	1602	protein_coding	-	-
Os09g0484900	3.80443	2.03344	5.86966	21.8691	32.0075	53.9369	3.90251	35.9378	-3.20427	6.11052e-07	1.13469e-05	-	9	18715940	18718840	+	1959	protein_coding	PF00939:Sodium:sulfate symporter transmembrane region	Na_sulph_symp
Os04g0545600	107.475	269.431	200.547	72.5132	31.0376	41.8476	192.484	48.4661	1.99667	6.19882e-07	1.15035e-05	-	4	27333724	27335203	-	827	protein_coding	PF02298:Plastocyanin-like domain	Cu_bind_like
Os06g0646000	124.595	96.5885	140.872	235.956	278.368	457.533	120.685	323.952	-1.4257	6.25662e-07	1.16034e-05	-	6	26376114	26379069	-	1355	protein_coding	PF08241:Methyltransferase domain	Methyltransf_11
Os01g0233900	291.99	215.545	280.765	118.553	121.241	147.861	262.767	129.218	1.02225	6.29019e-07	1.16438e-05	-	1	7404911	7409638	-	1696	protein_coding	PF00179:Ubiquitin-conjugating enzyme	UQ_con
Os05g0163300	165.493	201.311	254.352	490.327	398.639	384.068	207.052	424.345	-1.03436	6.51086e-07	1.2044e-05	-	5	3715778	3716891	-	1114	protein_coding	PF02469:Fasciclin domain	-
Os01g0537250	220.657	185.043	115.437	447.74	344.323	580.286	173.712	457.45	-1.39696	6.58668e-07	1.21765e-05	-	1	19549155	19550345	-	1191	protein_coding	PF12620:Protein of unknown function (DUF3778)	-
Os05g0404400	26.631	28.4682	24.4569	57.5502	97.9624	150.651	26.5187	102.055	-1.94935	6.66194e-07	1.23e-05	-	5	19691349	19694288	-	1251	protein_coding	-	-
Os08g0476900	947.304	1188.55	1559.37	606.579	479.143	658.402	1231.74	581.374	1.08316	6.67911e-07	1.23238e-05	-	8	23491893	23494532	-	1628	protein_coding	PF01734:Patatin-like phospholipase	-
novel.2230	148.373	46.7692	62.6097	319.979	459.744	249.225	85.9173	342.983	-1.9954	6.69625e-07	1.23397e-05	-	8	16069983	16151776	-	1356	-	-	-
Os03g0236200	1067.14	742.207	1313.83	2254.82	2003.86	3427.78	1041.06	2562.15	-1.29933	6.7586e-07	1.24467e-05	-	3	7181080	7184036	+	2017	protein_coding	PF00282:Pyridoxal-dependent decarboxylase conserved domain	-
Os03g0244000	41.8488	54.903	57.7183	94.3823	182.346	218.537	51.49	165.088	-1.68509	6.85176e-07	1.25899e-05	-	3	7615918	7618902	+	1070	protein_coding	-	-
Os04g0533900	178.808	273.498	219.134	105.892	69.8346	104.154	223.813	93.2936	1.26374	6.85508e-07	1.25899e-05	-	4	26684584	26687711	-	2934	protein_coding	-	-
Os05g0421600	26.631	17.2843	27.3918	102.439	74.6842	61.3764	23.769	79.5	-1.73416	6.85808e-07	1.25899e-05	-	5	20678578	20680160	+	841	protein_coding	-	-
Os06g0579100	428.95	204.361	271.961	646.864	748.782	905.767	301.757	767.138	-1.34582	6.86497e-07	1.25946e-05	-	6	22556192	22558566	+	2034	protein_coding	-	-
Os10g0113000	80.8442	78.2876	104.676	27.6241	8.72932	28.8283	87.9358	21.7272	2.02257	6.87794e-07	1.26104e-05	-	10	866391	868385	+	1214	protein_coding	PF00248:Aldo/keto reductase family	Aldo_ket_red
Os06g0229400	2520.44	2157.48	3792.78	1457.17	1299.7	1251.71	2823.57	1336.19	1.07962	7.00314e-07	1.28157e-05	-	6	6736085	6737686	+	1188	protein_coding	PF00657:GDSL-like Lipase/Acylhydrolase	Lipase_GDSL
Os08g0162600	51.3598	43.719	38.1528	86.3252	161.007	265.035	44.4106	170.789	-1.94583	7.18776e-07	1.31121e-05	-	8	3694305	3696637	+	1004	protein_coding	-	-
Os01g0524500	181.662	165.726	238.7	348.754	387	498.451	195.362	411.402	-1.07541	7.28435e-07	1.32716e-05	MYBS1	1	18755303	18756817	+	1394	protein_coding	PF00249:Myb-like DNA-binding domain	Myb_DNA-binding
Os03g0805600	48.5065	40.6689	45.0007	86.3252	138.699	195.289	44.7254	140.104	-1.65062	7.31663e-07	1.33221e-05	-	3	33638650	33641123	+	850	protein_coding	PF00355:Rieske [2Fe-2S] domain	-
Os03g0848700	141.715	178.943	180.981	72.5132	84.3834	82.7652	167.213	79.8873	1.06208	7.38339e-07	1.34352e-05	-	3	35693286	35699010	-	4553	protein_coding	PF00931:NB-ARC domain	NB-ARC
Os11g0450400	58.0176	88.4548	97.8277	32.2281	20.3684	20.4588	81.4334	24.3518	1.7527	7.73279e-07	1.40269e-05	-	11	15114204	15115306	-	1103	protein_coding	PF00685:Sulfotransferase domain	Sulfotransfer_1
Os11g0236100	136.96	180.976	262.178	73.6642	63.0451	80.9053	193.371	72.5382	1.4141	7.86948e-07	1.4257e-05	-	11	7255817	7258556	-	1818	protein_coding	PF05116:Sucrose-6F-phosphate phosphohydrolase|PF00534:Glycosyl transferases group 1	Glycos_transf_1
Os07g0604400	72.2842	129.124	138.915	42.5871	32.0075	35.3379	113.441	36.6442	1.63384	7.89348e-07	1.42916e-05	-	7	24755706	24758207	-	1420	protein_coding	PF04833:COBRA-like protein	-
Os02g0686700	240.63	208.428	263.156	56.3992	54.3158	123.683	237.405	78.1326	1.59788	8.08119e-07	1.46132e-05	-	2	28132758	28133637	-	770	protein_coding	-	-
Os01g0111100	12.3644	11.1839	21.5221	49.4931	53.3458	81.8352	15.0235	61.5581	-2.0375	8.33356e-07	1.50508e-05	-	1	586445	587696	-	1119	protein_coding	PF00160:Cyclophilin type peptidyl-prolyl cis-trans isomerase/CLD	Pro_isomerase
Os12g0151000	81.7953	66.0869	51.8487	149.63	194.955	139.492	66.577	161.359	-1.27679	8.42308e-07	1.5203e-05	-	12	2535927	2538830	+	1507	protein_coding	PF14008:Iron/zinc purple acid phosphatase-like protein C|PF16656:Purple acid Phosphatase, N-terminal domain|PF00149:Calcineurin-like phosphoesterase	Metallophos
Os11g0466300	81.7953	115.906	105.654	41.4361	32.9774	42.7775	101.118	39.0637	1.37234	8.48469e-07	1.53046e-05	-	11	16001552	16005285	-	1121	protein_coding	-	-
Os07g0103000	55.1643	61.0033	63.588	11.51	18.4286	22.3187	59.9185	17.4191	1.76508	8.54576e-07	1.53956e-05	-	7	182515	183243	-	619	protein_coding	-	-
Os01g0678400	169.297	139.291	174.133	23.0201	42.6767	73.4657	160.907	46.3875	1.78329	8.60912e-07	1.54905e-05	-	1	27896354	27898031	+	1678	protein_coding	PF11145:Protein of unknown function (DUF2921)	-
Os09g0341100	74.1864	47.7859	40.1094	11.51	14.5489	12.0893	54.0272	12.7161	2.08498	8.94375e-07	1.60428e-05	-	9	10480172	10482005	+	1710	protein_coding	PF00069:Protein kinase domain	Pkinase
Os11g0428800	11972.6	6991.99	6621.96	18713	17126.9	27328.3	8528.83	21056.1	-1.30381	9.04261e-07	1.62102e-05	-	11	13723177	13724624	+	762	protein_coding	PF02298:Plastocyanin-like domain	Cu_bind_like
Os07g0635700	428.95	827.611	756.208	233.654	194.955	330.131	670.923	252.913	1.40646	9.27753e-07	1.65902e-05	-	7	26394225	26396629	+	1599	protein_coding	PF00067:Cytochrome P450	p450
Os03g0220100	112.231	171.826	154.568	67.9092	53.3458	62.3064	146.208	61.1871	1.25851	9.29973e-07	1.66197e-05	-	3	6302865	6304849	-	1892	protein_coding	PF08392:FAE1/Type III polyketide synthase-like protein|PF08541:3-Oxoacyl-[acyl-carrier-protein (ACP)] synthase III C terminal	-
Os01g0287400	206.39	165.726	197.612	75.9662	108.632	81.8352	189.909	88.811	1.09398	9.35353e-07	1.6685e-05	-	1	10333794	10334375	+	582	protein_coding	-	-
Os01g0718500	52.311	74.2207	74.349	16.114	16.4887	26.0385	66.9602	19.5471	1.76568	9.52706e-07	1.69736e-05	-	1	29937455	29938094	+	507	protein_coding	-	-
Os07g0152900	35.191	57.9531	32.2831	88.6272	142.579	163.67	41.8091	131.626	-1.66029	9.86513e-07	1.75221e-05	-	7	2797691	2801343	+	2108	protein_coding	PF01070:FMN-dependent dehydrogenase	FMN_dh
Os04g0319700	38.9954	111.839	64.5663	17.265	15.5188	9.29946	71.8004	14.0278	2.36361	1.03076e-06	1.82743e-05	-	4	14680109	14681661	+	1553	protein_coding	PF00201:UDP-glucoronosyl and UDP-glucosyl transferase	UDPGT
Os05g0350900	56.1154	86.4213	92.9363	10.359	26.188	24.1786	78.491	20.2419	1.93785	1.03765e-06	1.83741e-05	-	5	16582173	16583011	-	839	protein_coding	-	-
Os12g0485150	196.879	283.665	218.156	66.7582	88.2631	123.683	232.9	92.9014	1.31958	1.08563e-06	1.91885e-05	-	12	17939006	17940195	-	1124	protein_coding	-	-
Os03g0259100	1282.09	2791.92	2413.41	696.357	607.173	1046.19	2162.47	783.24	1.46477	1.09472e-06	1.93256e-05	-	3	8396569	8397410	+	733	protein_coding	PF02298:Plastocyanin-like domain	Cu_bind_like
novel.1533	14.2666	71.1705	67.5011	4.60401	6.78947	2.78984	50.9794	4.72777	3.43229	1.09856e-06	1.93816e-05	-	5	6951519	6952818	+	913	-	-	-
Os08g0277200	19.9733	42.7023	28.37	2.30201	1.93985	4.64973	30.3485	2.96386	3.33363	1.14525e-06	2.01684e-05	-	8	10718581	10720791	+	1420	protein_coding	PF01370:NAD dependent epimerase/dehydratase family	Epimerase
novel.1058	0.951108	4.06689	0.978277	23.0201	32.9774	22.3187	1.99876	26.1054	-3.72864	1.21014e-06	2.12854e-05	-	3	2607729	2609646	+	1918	-	-	-
Os04g0110200	700.967	873.364	865.775	521.404	330.744	368.259	813.369	406.802	1.00151	1.21463e-06	2.13515e-05	-	4	599975	600881	+	907	protein_coding	-	-
Os04g0422000	12.3644	31.5184	13.6959	57.5502	80.5037	100.434	19.1929	79.496	-2.05935	1.26295e-06	2.21874e-05	-	4	20873336	20876370	+	1845	protein_coding	PF04755:PAP_fibrillin	-
Os09g0250700	125.546	118.956	134.024	206.03	290.007	384.998	126.176	293.678	-1.22112	1.29713e-06	2.27464e-05	-	9	3855460	3862963	+	2578	protein_coding	PF03109:ABC1 family	ABC1
Os03g0663400	1774.77	1935.84	3381.9	6325.91	5593.55	4653.45	2364.17	5524.31	-1.2244	1.3138e-06	2.30217e-05	-	3	26032958	26033800	-	843	protein_coding	PF00314:Thaumatin family	Thaumatin
Os02g0791400	135.057	91.5049	121.306	285.449	267.699	201.798	115.956	251.649	-1.11484	1.31441e-06	2.30217e-05	-	2	33607645	33609707	-	725	protein_coding	-	-
Os06g0553001	93.2086	99.6387	129.133	28.7751	51.406	36.2679	107.327	38.8163	1.46014	1.35919e-06	2.37056e-05	-	6	20996758	20997391	+	634	protein_coding	-	-
Os11g0146300	113.182	78.2876	110.545	37.9831	44.6165	33.4781	100.672	38.6926	1.3811	1.37476e-06	2.39485e-05	-	11	2097686	2100890	+	912	protein_coding	-	-
Os10g0411100	61.822	70.1538	77.2839	20.7181	20.3684	29.7583	69.7532	23.6149	1.55485	1.40572e-06	2.44731e-05	-	10	14289311	14293647	-	1347	protein_coding	PF04788:Protein of unknown function (DUF620)	-
Os09g0554000	69.4309	73.2039	56.7401	123.157	146.459	162.741	66.4583	144.119	-1.12014	1.42463e-06	2.47576e-05	-	9	21949105	21952340	-	1438	protein_coding	PF00153:Mitochondrial carrier protein	Mito_carr
Os01g0159200	540.229	979.103	745.447	231.352	228.902	404.526	754.926	288.26	1.38734	1.47511e-06	2.55582e-05	-	1	3097415	3098160	-	746	protein_coding	PF02469:Fasciclin domain	-
Os04g0538100	31.3866	28.4682	28.37	62.1542	93.1128	146.001	29.4083	100.423	-1.77612	1.48248e-06	2.56707e-05	-	4	26917910	26919741	-	1373	protein_coding	PF00679:Elongation factor G C-terminus|PF03764:Elongation factor G, domain IV|PF14492:Elongation Factor G, domain II|PF03144:Elongation factor Tu domain 2	GTP_EFTU_D2
Os12g0432600	190.222	129.124	212.286	342.999	350.143	390.577	177.21	361.24	-1.02703	1.48437e-06	2.5688e-05	-	12	13982073	13982902	+	830	protein_coding	PF13639:Ring finger domain	-
Os03g0812400	44.7021	38.6354	34.2397	88.6272	97.9624	92.9946	39.1924	93.1947	-1.24977	1.48643e-06	2.57083e-05	-	3	34036246	34037092	+	847	protein_coding	PF13499:EF-hand domain pair	-
Os03g0128800	36.1421	36.602	28.37	72.5132	105.722	197.149	33.7047	125.128	-1.89625	1.54669e-06	2.67028e-05	-	3	1630177	1631745	-	1300	protein_coding	-	-
Os10g0470100	21.8755	19.3177	11.7393	62.1542	64.9849	51.147	17.6442	59.4287	-1.74978	1.56074e-06	2.69293e-05	-	10	17389132	17393941	-	1555	protein_coding	-	-
Os09g0502950	45.6532	39.6521	65.5446	116.251	116.391	178.55	50.2833	137.064	-1.44828	1.60156e-06	2.75952e-05	-	9	19465332	19466054	-	723	protein_coding	-	-
Os01g0849950	34.2399	39.6521	50.8704	11.51	7.7594	9.29946	41.5875	9.52296	2.13649	1.64151e-06	2.81887e-05	-	1	36527939	36529713	-	1408	protein_coding	-	-
Os12g0114800	796.078	1382.74	552.726	2894.77	3884.55	1814.32	910.515	2864.55	-1.65366	1.64909e-06	2.82853e-05	LTP110-A	12	727802	728559	+	668	protein_coding	PF00234:Protease inhibitor/seed storage/LTP family	-
Os12g0125500	237.777	433.123	394.246	135.818	164.887	159.951	355.049	153.552	1.20728	1.67381e-06	2.86585e-05	-	12	1220955	1224975	-	3518	protein_coding	PF01554:MatE	MatE
Os11g0258500	213.999	209.445	250.439	109.345	90.203	132.982	224.628	110.844	1.01778	1.68075e-06	2.87602e-05	-	11	8568422	8572176	-	2913	protein_coding	PF00931:NB-ARC domain	NB-ARC
Os06g0320500	662.922	895.732	529.248	1176.33	1806.97	2757.29	695.967	1913.53	-1.4596	1.68373e-06	2.87943e-05	-	6	12452708	12454049	+	1048	protein_coding	PF00504:Chlorophyll A-B binding protein	-
Os08g0546300	53.2621	58.9698	52.827	21.8691	15.5188	11.1594	55.0196	16.1824	1.78333	1.73847e-06	2.9643e-05	-	8	27364165	27364816	+	568	protein_coding	-	-
Os04g0182200	223.51	231.812	282.722	94.3823	146.459	107.874	246.015	116.238	1.07843	1.76608e-06	3.00784e-05	-	4	5590414	5592679	+	1386	protein_coding	PF14226:non-haem dioxygenase in morphine synthesis N-terminal|PF03171:2OG-Fe(II) oxygenase superfamily	2OG-FeII_Oxy
Os04g0611700	14.2666	36.602	32.2831	1.151	2.90977	0.929946	27.7172	1.66357	4.04483	1.77118e-06	3.01475e-05	-	4	31019367	31024094	+	2220	protein_coding	PF03936:Terpene synthase family, metal binding domain|PF01397:Terpene synthase, N-terminal domain	-
Os02g0695200	172.151	179.96	210.33	41.4361	41.7068	97.6443	187.48	60.2624	1.63022	1.77925e-06	3.02671e-05	-	2	28558264	28560020	-	1662	protein_coding	PF00249:Myb-like DNA-binding domain	Myb_DNA-binding
Os01g0121600	290.088	244.013	392.289	605.428	556.737	783.944	308.797	648.703	-1.07106	1.78145e-06	3.02868e-05	-	1	1223134	1223887	-	754	protein_coding	-	-
Os03g0210700	283.43	292.816	374.68	506.441	626.571	803.473	316.975	645.495	-1.02715	1.80058e-06	3.05581e-05	-	3	5777776	5779292	+	1101	protein_coding	-	-
Os01g0363600	122.693	93.5384	122.285	188.765	243.451	254.805	112.839	229.007	-1.02249	1.8703e-06	3.16672e-05	-	1	14802807	14804515	-	974	protein_coding	PF02110:Hydroxyethylthiazole kinase family	-
Os12g0137000	68.4798	58.9698	74.349	18.4161	22.3083	27.8984	67.2662	22.8742	1.54686	1.87937e-06	3.18023e-05	-	12	1790096	1791193	-	1098	protein_coding	PF02365:No apical meristem (NAM) protein	NAM
Os04g0107300	185.466	206.394	266.091	103.59	111.541	111.594	219.317	108.908	1.00853	1.88166e-06	3.18038e-05	-	4	446012	447110	+	1099	protein_coding	PF02826:D-isomer specific 2-hydroxyacid dehydrogenase, NAD binding domain|PF00389:D-isomer specific 2-hydroxyacid dehydrogenase, catalytic domain	2-Hacid_dh_C
Os08g0409100	1883.19	1320.72	1544.7	2862.55	2921.41	5151.9	1582.87	3645.29	-1.20357	1.8989e-06	3.20579e-05	-	8	19578772	19582453	+	1777	protein_coding	PF02358:Trehalose-phosphatase	-
Os01g0850900	1899.36	1434.59	2423.19	3461.07	3803.07	5594.55	1919.05	4286.23	-1.15939	1.94192e-06	3.27271e-05	-	1	36639626	36640552	+	927	protein_coding	PF04832:SOUL heme-binding protein	-
Os04g0436000	255.848	476.842	426.529	178.406	154.218	173.9	386.406	168.841	1.19447	1.95047e-06	3.2852e-05	-	4	21692755	21693624	+	870	protein_coding	-	-
Os03g0827700	270.115	349.752	254.352	509.894	668.278	1208	291.406	795.391	-1.44965	1.98613e-06	3.34138e-05	-	3	34765940	34772284	+	2729	protein_coding	PF00098:Zinc knuckle|PF08152:GUCT (NUC152) domain|PF00271:Helicase conserved C-terminal domain	zf-CCHC
Os11g0154500	105.573	92.5217	144.785	276.241	216.293	455.673	114.293	316.069	-1.46812	2.02413e-06	3.39349e-05	-	11	2550551	2552963	+	2329	protein_coding	PF02365:No apical meristem (NAM) protein	NAM
novel.135	18.0711	29.4849	21.5221	62.1542	71.7744	66.0262	23.026	66.6516	-1.53856	2.27374e-06	3.78119e-05	-	1	39861997	39864772	+	1859	-	-	-
Os05g0406000	172.151	145.391	150.655	264.731	295.827	429.635	156.065	330.064	-1.08209	2.27495e-06	3.78119e-05	-	5	19777945	19780020	+	742	protein_coding	-	-
Os01g0860400	264.408	453.458	416.746	180.708	187.195	154.371	378.204	174.091	1.11955	2.29647e-06	3.81478e-05	-	1	37235781	37237206	+	1346	protein_coding	PF00704:Glycosyl hydrolases family 18	-
Os02g0234500	224.462	207.411	214.243	352.207	422.887	646.312	215.372	473.802	-1.13884	2.31019e-06	3.83318e-05	-	2	7621905	7627260	+	2564	protein_coding	PF08547:Complex I intermediate-associated protein 30 (CIA30)|PF13460:NAD(P)H-binding	-
Os03g0386000	1688.22	1087.89	1389.15	3514.01	2870.98	2217.92	1388.42	2867.64	-1.04604	2.34682e-06	3.89172e-05	-	3	15329520	15334903	+	3358	protein_coding	-	-
Os02g0207500	66.5776	34.5685	38.1528	5.75502	13.5789	4.64973	46.433	7.99456	2.53243	2.39417e-06	3.96117e-05	-	2	6020675	6021256	+	582	protein_coding	-	-
Os02g0749700	20.9244	35.5853	31.3049	71.3622	114.451	78.1155	29.2715	87.9762	-1.59269	2.41112e-06	3.98468e-05	-	2	31515301	31517784	-	2076	protein_coding	PF07731:Multicopper oxidase|PF00394:Multicopper oxidase|PF07732:Multicopper oxidase	-
Os04g0630400	79.8931	73.2039	62.6097	9.20803	18.4286	29.7583	71.9023	19.1316	1.88947	2.44843e-06	4.04172e-05	-	4	32063756	32065731	+	1418	protein_coding	PF01370:NAD dependent epimerase/dehydratase family	Epimerase
Os04g0607500	6.65776	9.15049	13.6959	58.7012	36.8571	38.1278	9.83471	44.562	-2.17559	2.50444e-06	4.12713e-05	-	4	30724493	30727084	-	2194	protein_coding	PF02386:Cation transport protein	-
novel.2195	58.9687	37.6187	49.8921	93.2313	138.699	179.48	48.8265	137.137	-1.49177	2.53481e-06	4.17007e-05	-	8	7880643	7883239	-	2138	-	PF00651:BTB/POZ domain	BTB
Os10g0419400	97.013	91.5049	61.6314	191.067	218.233	156.231	83.3831	188.51	-1.17615	2.54263e-06	4.18055e-05	-	10	14751991	14754323	-	899	protein_coding	PF03079:ARD/ARD' family	-
Os05g0506600	12.3644	30.5016	13.6959	51.7951	174.586	79.9753	18.854	102.119	-2.4434	2.5705e-06	4.22264e-05	-	5	25025141	25027155	-	1113	protein_coding	PF00657:GDSL-like Lipase/Acylhydrolase	Lipase_GDSL
Os07g0577600	275.821	344.669	222.069	484.572	709.985	1295.41	280.853	829.991	-1.56419	2.58631e-06	4.24035e-05	-	7	23357777	23359442	+	1666	protein_coding	PF00504:Chlorophyll A-B binding protein	-
Os06g0270982	57.0665	85.4046	41.0876	10.359	19.3985	14.8791	61.1862	14.8789	2.02814	2.64411e-06	4.32777e-05	-	6	9100687	9102101	-	1415	protein_coding	PF00201:UDP-glucoronosyl and UDP-glucosyl transferase	UDPGT
Os05g0464200	105.573	104.722	150.655	41.4361	47.5263	57.6566	120.317	48.873	1.29437	2.65328e-06	4.33544e-05	-	5	22800714	22800965	-	252	protein_coding	-	-
Os06g0329900	278.675	233.846	293.483	100.137	59.1654	143.212	268.668	100.838	1.41268	2.66573e-06	4.35333e-05	-	6	13041900	13044158	+	1439	protein_coding	PF03492:SAM dependent carboxyl methyltransferase	-
Os01g0275950	301.501	200.294	281.744	132.365	119.301	136.702	261.18	129.456	1.01352	2.68547e-06	4.38164e-05	-	1	9648667	9651434	-	987	protein_coding	-	-
Os03g0807500	423.243	799.143	649.576	260.127	274.489	316.182	623.987	283.599	1.13653	2.68609e-06	4.38164e-05	-	3	33752799	33756068	+	1039	protein_coding	PF02298:Plastocyanin-like domain	Cu_bind_like
Os10g0345701	74.1864	88.4548	90.0015	33.3791	31.0376	38.1278	84.2142	34.1815	1.29824	2.68975e-06	4.38514e-05	-	10	10341313	10342904	+	936	protein_coding	PF04484:QWRF family	-
Os03g0785900	51.3598	86.4213	74.349	27.6241	20.3684	19.5289	70.7101	22.5071	1.65929	2.69285e-06	4.38773e-05	-	3	32619263	32620205	-	943	protein_coding	PF13417:Glutathione S-transferase, N-terminal domain|PF13410:Glutathione S-transferase, C-terminal domain	-
Os10g0450400	152.177	128.107	149.676	74.8152	74.6842	56.7267	143.32	68.742	1.06446	2.72026e-06	4.42492e-05	-	10	16408958	16415735	+	3041	protein_coding	PF13968:Domain of unknown function (DUF4220)|PF04578:Protein of unknown function, DUF594	-
Os12g0575000	130.302	167.759	108.589	250.919	319.105	561.687	135.55	377.237	-1.47861	2.74027e-06	4.45497e-05	-	12	23735825	23736773	-	851	protein_coding	PF06549:Protein of unknown function (DUF1118)	-
Os04g0382400	123.644	166.742	144.785	56.3992	79.5338	58.5866	145.057	64.8399	1.15797	2.84759e-06	4.62372e-05	-	4	18757823	18758848	-	1026	protein_coding	PF05553:Cotton fibre expressed protein	-
Os01g0299300	296.746	264.348	323.81	119.704	72.7443	162.741	294.968	118.396	1.31615	2.88539e-06	4.68041e-05	-	1	10969328	10973346	-	1830	protein_coding	PF01553:Acyltransferase	Acyltransferase
Os09g0296800	54.2132	59.9866	54.7835	107.043	135.789	224.117	56.3277	155.65	-1.47023	2.92856e-06	4.74776e-05	-	9	7185218	7188139	+	1201	protein_coding	PF00504:Chlorophyll A-B binding protein	-
novel.722	35.191	56.9364	31.3049	8.05702	8.72932	9.29946	41.1441	8.69527	2.23647	2.94768e-06	4.77076e-05	-	12	26613535	26617635	+	2524	-	-	-
Os07g0448200	291.039	156.575	172.177	612.334	487.872	398.947	206.597	499.718	-1.27253	3.13019e-06	5.03802e-05	-	7	15369152	15370242	+	909	protein_coding	PF00230:Major intrinsic protein	-
Os03g0322700	119.84	130.14	142.828	56.3992	64.9849	68.816	130.936	63.4	1.04177	3.13788e-06	5.0476e-05	-	3	11683525	11684400	-	785	protein_coding	PF00170:bZIP transcription factor	bZIP_1
Os08g0148267	78.942	69.1371	80.2187	133.516	152.278	175.76	76.0993	153.851	-1.01775	3.18242e-06	5.11357e-05	-	8	2760819	2765216	-	1209	protein_coding	PF01408:Oxidoreductase family, NAD-binding Rossmann fold|PF02894:Oxidoreductase family, C-terminal alpha/beta domain	GFO_IDH_MocA
novel.1593	8.55997	10.1672	13.6959	49.4931	45.5865	34.408	10.8077	43.1625	-1.99476	3.19886e-06	5.13429e-05	-	5	27115972	27117021	+	877	-	-	-
Os06g0495800	1770.96	1770.11	2906.46	1159.06	1055.28	973.653	2149.18	1062.66	1.01637	3.22637e-06	5.17558e-05	-	6	17284744	17286325	+	1582	protein_coding	PF04759:Protein of unknown function, DUF617	-
Os04g0411400	384.248	278.582	243.591	780.38	496.601	1205.21	302.14	827.397	-1.45337	3.26686e-06	5.23764e-05	-	4	20319029	20321385	-	1350	protein_coding	PF01161:Phosphatidylethanolamine-binding protein	-
Os11g0438700	94.1597	52.8695	76.3056	222.144	143.549	185.059	74.4449	183.584	-1.29835	3.33031e-06	5.33051e-05	-	11	14330653	14336130	+	4608	protein_coding	PF00106:short chain dehydrogenase	adh_short
Os08g0221300	3.80443	2.03344	2.93483	32.2281	22.3083	21.3888	2.92424	25.3084	-3.10051	3.33327e-06	5.33231e-05	-	8	7363845	7367943	-	736	protein_coding	-	-
Os06g0132500	121.742	151.491	175.112	78.2682	61.1052	43.7075	149.448	61.027	1.29975	3.41902e-06	5.44844e-05	-	6	1737381	1737728	-	348	protein_coding	-	-
Os07g0134000	428.95	588.682	617.293	315.375	204.654	279.914	544.975	266.648	1.03255	3.43059e-06	5.46387e-05	-	7	1788844	1794564	-	1986	protein_coding	PF01490:Transmembrane amino acid transporter protein	Aa_trans
novel.290	201.635	126.073	151.633	300.412	368.571	301.302	159.78	323.429	-1.01654	3.48496e-06	5.53526e-05	-	1	39780260	39783500	-	3241	-	-	-
Os05g0472400	139.813	109.806	72.3925	210.634	256.06	314.322	107.337	260.338	-1.27917	3.5139e-06	5.57818e-05	-	5	23201237	23212773	+	1205	protein_coding	PF02535:ZIP Zinc transporter	-
Os03g0340500	30.4355	24.4013	28.37	94.3823	74.6842	61.3764	27.7356	76.8143	-1.46305	3.52057e-06	5.58571e-05	-	3	12674467	12680655	-	2762	protein_coding	PF00534:Glycosyl transferases group 1	Glycos_transf_1
Os12g0117400	12.3644	19.3177	5.86966	41.4361	56.2556	62.3064	12.5173	53.3327	-2.09921	3.5304e-06	5.59824e-05	-	12	861211	863519	-	1995	protein_coding	PF03000:NPH3 family	-
Os08g0515800	67.5287	62.02	53.8052	117.402	130.94	198.078	61.118	148.807	-1.28671	3.61266e-06	5.71929e-05	-	8	25589036	25590554	-	1292	protein_coding	PF02536:mTERF	-
Os05g0552700	45.6532	24.4013	30.3266	82.8722	86.3233	105.084	33.4604	91.4265	-1.44845	3.67585e-06	5.81298e-05	-	5	27485811	27487593	-	1783	protein_coding	PF00201:UDP-glucoronosyl and UDP-glucosyl transferase	UDPGT
Os04g0634900	50.4087	45.7525	43.0442	9.20803	8.72932	17.669	46.4018	11.8688	1.95246	3.73095e-06	5.89689e-05	-	4	32296094	32296600	-	507	protein_coding	-	-
Os04g0520700	239.679	233.846	302.288	470.76	433.556	692.81	258.604	532.375	-1.04245	3.78625e-06	5.96724e-05	-	4	26074703	26075861	-	1159	protein_coding	PF04520:Senescence regulator	-
Os09g0544400	71.3331	65.0702	57.7183	124.308	141.609	127.403	64.7072	131.107	-1.01918	3.79866e-06	5.97496e-05	-	9	21496586	21505763	+	7766	protein_coding	PF00043:Glutathione S-transferase, C-terminal domain	GST_C
Os10g0108700	50.4087	311.117	184.894	44.8891	29.0977	20.4588	182.14	31.4819	2.53787	3.79889e-06	5.97496e-05	-	10	583024	584657	+	1512	protein_coding	PF02458:Transferase family	-
Os02g0698000	58.0176	66.0869	36.1962	95.5333	192.045	252.015	53.4336	179.865	-1.75439	3.82855e-06	6.01182e-05	-	2	28701864	28704291	+	1646	protein_coding	PF00485:Phosphoribulokinase / Uridine kinase family	-
Os04g0457000	19.9733	28.4682	9.78277	48.3421	86.3233	161.811	19.4081	98.8253	-2.35368	3.86965e-06	6.0665e-05	-	4	22835913	22837163	-	1141	protein_coding	PF00504:Chlorophyll A-B binding protein	-
Os05g0361500	1144.18	615.116	785.556	1817.43	1548.97	2572.23	848.285	1979.54	-1.22245	3.88868e-06	6.08706e-05	-	5	17237008	17240099	+	1962	protein_coding	PF01095:Pectinesterase|PF04043:Plant invertase/pectin methylesterase inhibitor	-
Os03g0216700	666.727	384.321	531.204	961.088	1006.78	1301.92	527.417	1089.93	-1.04714	3.88906e-06	6.08706e-05	-	3	6131846	6142781	-	2369	protein_coding	PF01554:MatE	MatE
Os03g0336900	22.8266	35.5853	31.3049	5.75502	4.84962	4.64973	29.9056	5.08479	2.56273	3.96876e-06	6.18508e-05	-	3	12509759	12510704	-	946	protein_coding	PF04844:Transcriptional repressor, ovate	-
Os11g0215100	212.097	234.863	296.418	97.8353	75.6541	141.352	247.793	104.947	1.2372	3.97792e-06	6.19602e-05	-	11	5996508	5997392	+	885	protein_coding	PF03018:Dirigent-like protein	-
Os03g0201500	8595.17	7975.16	14156.6	5100.1	3967.96	5327.66	10242.3	4798.57	1.09389	4.01796e-06	6.25167e-05	-	3	5317215	5321081	+	2317	protein_coding	PF02018:Carbohydrate binding domain|PF00331:Glycosyl hydrolase family 10	-
Os06g0201000	20.9244	13.2174	16.6307	73.6642	69.8346	39.9877	16.9242	61.1621	-1.84627	4.04923e-06	6.29019e-05	-	6	5102389	5103441	+	1053	protein_coding	-	-
novel.2224	32.3377	7.11705	15.6524	65.6072	93.1128	81.8352	18.3691	80.1851	-2.12093	4.12145e-06	6.39553e-05	-	8	16049960	16051225	-	618	-	-	-
Os10g0528400	55.1643	51.8528	64.5663	17.265	19.3985	21.3888	57.1945	19.3508	1.55811	4.14167e-06	6.42002e-05	-	10	20559589	20560614	+	929	protein_coding	PF02798:Glutathione S-transferase, N-terminal domain	GST_N
Os04g0458000	25.6799	19.3177	11.7393	78.2682	61.1052	53.0069	18.9123	64.1268	-1.75571	4.15252e-06	6.43341e-05	-	4	22881022	22881510	+	489	protein_coding	-	-
Os03g0580200	109.377	103.706	178.046	42.5871	22.3083	54.8668	130.376	39.9207	1.70722	4.22958e-06	6.53186e-05	-	3	21275422	21276198	-	777	protein_coding	-	-
Os04g0347200	18.0711	27.4515	28.37	77.1172	80.5037	56.7267	24.6309	71.4492	-1.53665	4.30853e-06	6.64316e-05	-	4	16519831	16521452	-	1209	protein_coding	PF00704:Glycosyl hydrolases family 18	-
Os01g0842400	548.789	815.411	617.293	220.993	282.248	394.297	660.498	299.179	1.1402	4.34845e-06	6.69403e-05	-	1	36165929	36168939	-	2067	protein_coding	PF00394:Multicopper oxidase|PF07732:Multicopper oxidase|PF07731:Multicopper oxidase	-
Os06g0569500	96.0619	78.2876	76.3056	13.812	11.6391	37.1978	83.5517	20.883	1.98699	4.36362e-06	6.71381e-05	-	6	22020872	22028146	-	1813	protein_coding	PF00067:Cytochrome P450	p450
Os03g0243900	2135.24	4081.12	4478.55	1610.25	1487.86	1655.3	3564.97	1584.47	1.16985	4.38845e-06	6.74844e-05	-	3	7611453	7614083	-	1720	protein_coding	PF00314:Thaumatin family	Thaumatin
Os03g0317900	1.90222	2.03344	2.93483	55.2482	40.7368	8.36951	2.29016	34.7848	-3.91927	4.55968e-06	6.9858e-05	-	3	11449370	11450605	+	1236	protein_coding	PF14543:Xylanase inhibitor N-terminal|PF14541:Xylanase inhibitor C-terminal	-
Os02g0623300	663.874	977.069	1121.11	427.022	406.398	530.069	920.683	454.497	1.01777	4.5957e-06	7.03727e-05	-	2	24819271	24820066	+	796	protein_coding	-	-
Os07g0129700	57.0665	61.0033	15.6524	145.026	193.985	154.371	44.5741	164.461	-1.88448	4.59875e-06	7.03823e-05	-	7	1566125	1572085	+	1465	protein_coding	PF03791:KNOX2 domain|PF03790:KNOX1 domain|PF03789:ELK domain|PF05920:Homeobox KN domain	KNOX2
Os10g0438800	36.1421	40.6689	65.5446	11.51	8.72932	13.9492	47.4518	11.3962	2.05599	4.75528e-06	7.27395e-05	-	10	15741865	15742477	+	613	protein_coding	PF13639:Ring finger domain	-
Os04g0617050	83.6975	79.3043	85.1101	40.2851	34.9173	28.8283	82.704	34.6769	1.26197	4.80081e-06	7.32812e-05	-	4	31349656	31350385	-	730	protein_coding	PF02519:Auxin responsive protein	Auxin_inducible
Os06g0215900	1084.26	1209.9	1301.11	508.743	438.406	792.314	1198.42	579.821	1.04663	4.81677e-06	7.34862e-05	-	6	5894911	5896347	-	1311	protein_coding	PF00724:NADH:flavin oxidoreductase / NADH oxidase family	Oxidored_FMN
Os01g0237500	72.2842	33.5518	39.1311	156.536	113.481	136.702	48.3224	135.573	-1.48387	4.85373e-06	7.39722e-05	-	1	7619082	7620013	-	571	protein_coding	-	-
Os11g0216100	57.0665	51.8528	45.0007	93.2313	129.97	186.919	51.3067	136.707	-1.4175	4.86956e-06	7.41744e-05	-	11	6065311	6066797	-	1046	protein_coding	PF00226:DnaJ domain	DnaJ
Os06g0325900	17.1199	30.5016	30.3266	3.45301	3.8797	0.929946	25.9827	2.75422	3.26044	4.92753e-06	7.49394e-05	-	6	12751652	12753404	+	1753	protein_coding	PF00067:Cytochrome P450	p450
Os04g0143566	64.6754	67.1036	56.7401	17.265	23.2782	26.0385	62.8397	22.1939	1.49058	5.00117e-06	7.59795e-05	-	4	2959879	2961549	+	1671	protein_coding	PF13968:Domain of unknown function (DUF4220)	-
Os03g0108500	3.80443	3.05016	5.86966	20.7181	30.0677	32.5481	4.24142	27.7779	-2.71454	5.04927e-06	7.663e-05	-	3	499919	501855	-	1276	protein_coding	PF04116:Fatty acid hydroxylase superfamily	-
Os06g0725800	145.52	131.157	167.285	63.3052	79.5338	76.2556	147.987	73.0315	1.01507	5.08e-06	7.69754e-05	-	6	30868979	30870033	+	1055	protein_coding	PF03087:Arabidopsis protein of unknown function	-
Os02g0136150	34.2399	27.4515	25.4352	71.3622	66.9248	90.2047	29.0422	76.1639	-1.39154	5.0956e-06	7.71714e-05	-	2	1928657	1929365	+	632	protein_coding	-	-
Os09g0506450	3.80443	1.01672	1.95655	21.8691	21.3383	25.1085	2.25924	22.772	-3.32012	5.12793e-06	7.76206e-05	-	9	19596349	19597750	+	1072	protein_coding	-	-
novel.2227	94.1597	48.8026	26.4135	159.989	292.917	183.199	56.4586	212.035	-1.90827	5.21183e-06	7.8767e-05	-	8	15843623	15845238	-	681	-	-	-
Os04g0391900	14.2666	17.2843	12.7176	33.3791	62.0752	88.3449	14.7562	61.2664	-2.06151	5.21677e-06	7.88007e-05	-	4	19283338	19286824	+	1294	protein_coding	PF04909:Amidohydrolase	Amidohydro_2
Os03g0732000	131.253	84.3879	114.458	46.0401	33.9474	51.147	110.033	43.7115	1.33335	5.29376e-06	7.98803e-05	-	3	29957015	29974490	-	1449	protein_coding	PF02401:LytB protein	-
Os05g0458300	774.202	1656.24	1562.31	672.186	404.459	478.922	1330.92	518.522	1.36063	5.35707e-06	8.07936e-05	-	5	22499463	22503475	-	2059	protein_coding	PF00394:Multicopper oxidase|PF07731:Multicopper oxidase|PF07732:Multicopper oxidase	-
Os01g0327000	696.211	801.177	748.382	1771.39	1773.99	1019.22	748.59	1521.54	-1.02299	5.42976e-06	8.18048e-05	-	1	12551333	12557268	+	5936	protein_coding	PF00141:Peroxidase	-
Os08g0385000	20.9244	11.1839	22.5004	54.0972	62.0752	56.7267	18.2029	57.633	-1.6595	5.43367e-06	8.18212e-05	-	8	18161142	18161597	-	456	protein_coding	-	-
Os06g0282000	368.079	624.267	445.116	252.07	244.421	195.289	479.154	230.593	1.05586	5.44033e-06	8.1879e-05	-	6	9870664	9872417	-	1754	protein_coding	PF00201:UDP-glucoronosyl and UDP-glucosyl transferase	UDPGT
Os01g0924966	13.3155	10.1672	3.91311	40.2851	34.9173	53.9369	9.13195	43.0464	-2.2367	5.47465e-06	8.231e-05	-	1	40526591	40527179	-	589	protein_coding	PF02519:Auxin responsive protein	Auxin_inducible
Os01g0692000	53.2621	43.719	43.0442	107.043	93.1128	106.014	46.6751	102.057	-1.12649	5.5351e-06	8.31757e-05	-	1	28566638	28567684	-	1047	protein_coding	PF13410:Glutathione S-transferase, C-terminal domain	-
Os12g0479100	71.3331	85.4046	79.2404	25.3221	23.2782	39.0577	78.6594	29.2193	1.4206	5.68152e-06	8.52876e-05	-	12	17538320	17539655	-	904	protein_coding	-	-
Os04g0410400	1944.07	1383.76	2228.51	732.038	1111.53	591.446	1852.11	811.672	1.19018	5.8059e-06	8.68847e-05	-	4	20280360	20281976	+	1481	protein_coding	PF06830:Root cap	-
Os07g0670200	12.3644	18.301	21.5221	50.6441	49.4662	68.816	17.3958	56.3088	-1.6997	5.87203e-06	8.76481e-05	-	7	28339687	28340470	+	784	protein_coding	PF00168:C2 domain	C2
Os12g0420400	228.266	391.438	218.156	463.854	796.308	1155.92	279.286	805.362	-1.52901	5.96489e-06	8.88511e-05	-	12	13115340	13117325	+	1256	protein_coding	-	-
Os01g0893400	411.83	282.649	270.983	919.652	601.353	577.496	321.82	699.5	-1.11865	6.09737e-06	9.06382e-05	-	1	38843729	38846523	+	2088	protein_coding	PF02135:TAZ zinc finger|PF00651:BTB/POZ domain	zf-TAZ
Os01g0248701	111.28	245.03	114.458	29.9261	64.015	23.2486	156.923	39.0632	2.00344	6.13229e-06	9.10638e-05	-	1	8191032	8192289	+	1258	protein_coding	PF00348:Polyprenyl synthetase	-
Os09g0419200	1884.15	1645.06	1827.42	549.029	612.992	1153.13	1785.54	771.718	1.20938	6.18563e-06	9.16212e-05	-	9	15076258	15079326	-	1605	protein_coding	PF01370:NAD dependent epimerase/dehydratase family	Epimerase
Os02g0666250	91.3064	72.1872	50.8704	238.258	164.887	142.282	71.4547	181.809	-1.34374	6.34494e-06	9.37892e-05	-	2	27046312	27046632	-	321	protein_coding	-	-
Os04g0580800	195.928	137.257	237.721	81.7212	85.3534	91.1347	190.302	86.0698	1.14411	6.39666e-06	9.45056e-05	-	4	29317364	29318451	-	1088	protein_coding	PF13639:Ring finger domain	-
Os12g0246700	121.742	124.04	116.415	55.2482	66.9248	57.6566	120.732	59.9432	1.00765	6.42719e-06	9.486e-05	-	12	8161472	8165176	+	3223	protein_coding	PF00931:NB-ARC domain	NB-ARC
Os08g0478000	1532.24	2456.4	3160.81	1094.6	1214.35	944.825	2383.15	1084.59	1.13573	6.43694e-06	9.49555e-05	-	8	23575567	23576307	+	741	protein_coding	-	-
Os12g0236100	317.67	367.036	376.637	992.165	732.293	519.84	353.781	748.099	-1.07938	6.5448e-06	9.64484e-05	-	12	7441389	7446142	-	2764	protein_coding	PF10358:N-terminal C2 in EEIG1 and EHBP1 proteins	-
Os07g0248550	1.90222	1.01672	8.80449	62.1542	17.4586	43.7075	3.90781	41.1068	-3.38813	6.78107e-06	9.94752e-05	-	7	8248489	8258077	-	1931	protein_coding	PF00069:Protein kinase domain	Pkinase
Os01g0878700	140.764	126.073	122.285	65.6072	40.7368	66.9561	129.707	57.7667	1.16992	6.79777e-06	9.96696e-05	-	1	38133475	38137770	-	1754	protein_coding	PF01490:Transmembrane amino acid transporter protein	Aa_trans
novel.1337	51.3598	54.903	79.2404	17.265	9.69925	24.1786	61.8344	17.0476	1.85582	6.94366e-06	0.000101529	-	4	16672078	16672520	+	443	-	PF08263:Leucine rich repeat N-terminal domain	LRRNT_2
Os05g0457800	2126.68	2659.74	4575.4	1307.54	1458.77	1376.32	3120.61	1380.88	1.17617	6.96508e-06	0.000101763	-	5	22481303	22484543	+	2317	protein_coding	PF12710:haloacid dehalogenase-like hydrolase	-
Os03g0223100	91.3064	69.1371	75.3273	25.3221	25.218	38.1278	78.5903	29.556	1.40443	7.02156e-06	0.000102446	-	3	6443453	6445461	-	2009	protein_coding	PF00067:Cytochrome P450	p450
Os05g0130100	120.791	73.2039	126.198	29.9261	28.1278	50.2171	106.731	36.0903	1.55881	7.02249e-06	0.000102446	-	5	1752425	1755727	+	2291	protein_coding	PF01657:Salt stress response/antifungal|PF07714:Protein tyrosine kinase	Pkinase_Tyr
Os11g0278300	149.324	125.057	118.372	50.6441	21.3383	59.5165	130.917	43.833	1.58027	7.05348e-06	0.000102847	-	11	9896885	9898239	-	1355	protein_coding	PF03140:Plant protein of unknown function	-
Os09g0399800	3698.86	10076.7	4451.16	1845.06	2501.44	2138.88	6075.58	2161.79	1.49069	7.10882e-06	0.000103602	-	9	13982981	13984584	-	1407	protein_coding	PF08240:Alcohol dehydrogenase GroES-like domain|PF00107:Zinc-binding dehydrogenase	ADH_N
Os11g0170000	82.7464	75.2374	101.741	41.4361	34.9173	31.6182	86.5749	35.9905	1.27311	7.4945e-06	0.000109058	-	11	3382390	3388871	-	2194	protein_coding	PF01425:Amidase	Amidase
Os06g0132400	14.2666	24.4013	23.4786	50.6441	63.0451	111.594	20.7155	75.0942	-1.86511	7.54392e-06	0.000109667	-	6	1733988	1734456	-	469	protein_coding	PF07109:Magnesium-protoporphyrin IX methyltransferase C-terminus	-
Os07g0541000	106.524	192.16	142.828	73.6642	50.4361	41.8476	147.171	55.3159	1.41849	7.54873e-06	0.000109682	-	7	21359653	21366555	+	2355	protein_coding	PF01657:Salt stress response/antifungal|PF07714:Protein tyrosine kinase	Pkinase_Tyr
Os07g0410300	86.5509	218.595	126.198	35.6811	49.4662	51.147	143.781	45.4314	1.65669	7.57998e-06	0.000110025	-	7	12826360	12827317	-	899	protein_coding	-	-
Os04g0534600	3.80443	6.10033	3.91311	16.114	34.9173	45.5673	4.60596	32.1996	-2.81831	7.58884e-06	0.000110099	-	4	26720079	26721025	+	947	protein_coding	PF05648:Peroxisomal biogenesis factor 11 (PEX11)	-
Os01g0155800	448.923	407.705	264.135	126.61	134.82	212.028	373.588	157.819	1.2406	7.67819e-06	0.000111228	-	1	2999576	3001139	+	687	protein_coding	-	-
Os06g0641400	107.475	45.7525	56.7401	155.385	214.353	211.098	69.9893	193.612	-1.46696	7.71468e-06	0.000111701	-	6	26092437	26093341	-	905	protein_coding	PF00067:Cytochrome P450	p450
novel.1614	4.75554	7.11705	6.84794	20.7181	49.4662	34.408	6.24018	34.8641	-2.49141	8.01027e-06	0.000115865	-	5	4493935	4495072	-	1138	-	-	-
Os07g0612400	33.2888	102.689	36.1962	10.359	11.6391	9.29946	57.3913	10.4325	2.45838	8.15851e-06	0.00011795	-	7	25214544	25216620	-	1075	protein_coding	PF12697:Alpha/beta hydrolase family	-
Os06g0219400	388.052	489.043	626.097	1192.44	1107.65	776.505	501.064	1025.53	-1.03295	8.23599e-06	0.000118871	-	6	6147480	6150466	+	1289	protein_coding	PF10250:GDP-fucose protein O-fucosyltransferase	-
Os07g0510900	81.7953	103.706	103.697	222.144	253.15	152.511	96.3994	209.268	-1.1178	8.46748e-06	0.000121931	-	7	19495589	19498889	+	1748	protein_coding	PF07731:Multicopper oxidase|PF00394:Multicopper oxidase|PF07732:Multicopper oxidase	-
EPlOSAG00000019095	12.3644	11.1839	20.5438	46.0401	61.1052	44.6374	14.6974	50.5943	-1.78346	8.52026e-06	0.000122569	-	11	702040	702183	-	144	ncRNA	-	-
Os04g0638700	684.798	458.541	604.575	195.671	237.632	358.029	582.638	263.777	1.14123	8.56581e-06	0.000123163	-	4	32459623	32460498	-	794	protein_coding	-	-
Os06g0633100	712.38	442.274	541.965	1083.09	1091.17	2464.36	565.54	1546.21	-1.45118	8.61841e-06	0.000123858	-	6	25655524	25656224	+	701	protein_coding	-	-
novel.1093	7.60887	14.2341	7.82622	29.9261	43.6466	51.147	9.88973	41.5732	-2.08306	8.66933e-06	0.000124528	-	3	12361433	12365949	+	4111	-	PF04434:SWIM zinc finger|PF03101:FAR1 DNA-binding domain|PF10551:MULE transposase domain	FAR1
Os03g0205800	14.2666	7.11705	11.7393	29.9261	53.3458	53.0069	11.041	45.4263	-2.04161	8.74083e-06	0.000125369	-	3	5538810	5540247	-	1218	protein_coding	PF00583:Acetyltransferase (GNAT) family	Acetyltransf_1
Os01g0108600	212.097	314.167	268.048	113.949	120.271	158.091	264.771	130.77	1.01415	8.91019e-06	0.000127609	-	1	478384	481165	+	1287	protein_coding	PF00010:Helix-loop-helix DNA-binding domain	HLH
Os06g0187500	77.0398	123.023	113.48	19.5671	37.8271	46.4973	104.514	34.6305	1.58045	8.92663e-06	0.000127781	-	6	4418788	4420340	-	1553	protein_coding	PF00201:UDP-glucoronosyl and UDP-glucosyl transferase	UDPGT
Os08g0203600	3080.64	1603.37	2650.15	1032.45	1114.44	1340.98	2444.72	1162.63	1.07212	8.96365e-06	0.000128248	-	8	6032208	6039069	+	4149	protein_coding	PF07714:Protein tyrosine kinase	Pkinase_Tyr
Os07g0422000	37.0932	27.4515	36.1962	81.7212	73.7143	153.441	33.5803	102.959	-1.61812	9.03622e-06	0.000129158	-	7	13602730	13604607	+	709	protein_coding	-	-
Os03g0439500	77.9909	86.4213	96.8494	33.3791	30.0677	44.6374	87.0872	36.0281	1.26853	9.06457e-06	0.000129372	-	3	18569114	18572507	+	2611	protein_coding	PF03171:2OG-Fe(II) oxygenase superfamily	2OG-FeII_Oxy
Os06g0659200	362.372	695.437	689.685	227.899	306.496	204.588	582.498	246.328	1.24119	9.07811e-06	0.000129502	-	6	27123569	27128527	-	2070	protein_coding	PF01348:Type II intron maturase	-
novel.767	69.4309	34.5685	45.0007	12.661	12.609	13.9492	49.6667	13.0731	1.92586	9.0968e-06	0.000129704	-	12	14446267	14448900	-	2533	-	-	-
novel.66	209.244	266.381	320.875	157.687	110.571	115.313	265.5	127.857	1.0579	9.1194e-06	0.000129963	-	1	17470041	17471877	+	1837	-	-	-
Os03g0851700	69.4309	87.438	88.0449	155.385	150.338	238.066	81.638	181.263	-1.15377	9.23229e-06	0.000131442	-	3	35861615	35864088	+	1359	protein_coding	PF12796:Ankyrin repeats (3 copies)	-
Os11g0111800	183.564	261.297	311.092	135.818	116.391	96.7144	251.984	116.308	1.11815	9.73885e-06	0.000138112	-	11	552576	558648	+	486	protein_coding	-	-
Os07g0476900	53.2621	65.0702	89.0232	146.177	137.729	216.677	69.1185	166.861	-1.27372	9.87769e-06	0.000139807	-	7	17268782	17269949	+	1168	protein_coding	PF00085:Thioredoxin	-
Os02g0285800	286.284	321.284	324.788	486.874	627.541	1090.83	310.785	735.081	-1.24301	9.93548e-06	0.000140488	-	2	10739451	10747067	+	2433	protein_coding	PF00679:Elongation factor G C-terminus|PF03144:Elongation factor Tu domain 2	GTP_EFTU_D2
Os05g0123000	53.2621	44.7357	55.7618	17.265	17.4586	17.669	51.2532	17.4642	1.55341	1.01528e-05	0.000143347	-	5	1266639	1267076	-	438	protein_coding	PF03195:Lateral organ boundaries (LOB) domain	-
Os01g0510200	210.195	235.879	148.698	98.9863	101.842	87.4149	198.257	96.0811	1.04574	1.01624e-05	0.000143347	-	1	17911538	17912144	-	607	protein_coding	-	-
Os10g0172000	43.751	86.4213	93.9146	29.9261	15.5188	13.9492	74.6956	19.798	1.93078	1.02693e-05	0.000144714	-	10	4946821	4948377	-	1462	protein_coding	PF00067:Cytochrome P450	p450
Os07g0421866	8.55997	19.3177	27.3918	49.4931	73.7143	86.485	18.4231	69.8975	-1.93005	1.04746e-05	0.000147274	-	7	13589444	13592322	+	1016	protein_coding	PF15044:Mitochondrial function, CLU-N-term	-
Os02g0159700	1629.25	988.253	1014.47	2170.79	2247.32	3250.16	1210.66	2556.09	-1.07816	1.05624e-05	0.000148411	-	2	3227570	3233296	-	3026	protein_coding	-	-
novel.2024	198.782	162.675	274.896	44.8891	97.9624	92.0646	212.118	78.3054	1.43158	1.0721e-05	0.000150494	-	7	14268853	14272421	-	3129	-	PF02992:Transposase family tnp2|PF13963:Transposase-associated domain	Transposase_21
Os03g0153400	25.6799	24.4013	27.3918	87.4762	69.8346	53.9369	25.8243	70.4159	-1.44126	1.10499e-05	0.000154661	-	3	2947355	2948285	-	931	protein_coding	PF02657:Fe-S metabolism associated domain	-
Os07g0564500	46.6043	86.4213	88.0449	12.661	9.69925	29.7583	73.6902	17.3728	2.07227	1.13038e-05	0.000157986	-	7	22619086	22621247	+	1961	protein_coding	PF07992:Pyridine nucleotide-disulphide oxidoreductase	Pyr_redox_2
Os04g0602100	7.60887	12.2007	7.82622	20.7181	54.3158	76.2556	9.21191	50.4298	-2.46255	1.13534e-05	0.000158526	-	4	30385512	30388334	+	1559	protein_coding	PF00141:Peroxidase	-
Os06g0234300	23.7777	43.719	63.588	10.359	9.69925	6.50962	43.6949	8.85597	2.31092	1.13983e-05	0.000159077	-	6	6995343	6996671	-	1329	protein_coding	PF13839:GDSL/SGNH-like Acyl-Esterase family found in Pmr5 and Cas1p|PF14416:PMR5 N terminal Domain	-
Os03g0595600	13.3155	3.05016	9.78277	55.2482	34.9173	37.1978	8.71615	42.4544	-2.27062	1.14507e-05	0.000159655	-	3	22160411	22161462	-	716	protein_coding	PF13417:Glutathione S-transferase, N-terminal domain	-
Os02g0179200	105.573	131.157	192.721	66.7582	44.6165	59.5165	143.15	56.9637	1.33256	1.1493e-05	0.000160054	-	2	4390150	4393564	-	1338	protein_coding	PF00117:Glutamine amidotransferase class-I	GATase
Os04g0507100	26.631	7.11705	22.5004	59.8522	66.9248	82.7652	18.7495	69.8474	-1.89347	1.14959e-05	0.000160054	-	4	25340375	25341989	-	1296	protein_coding	PF11998:Protein of unknown function (DUF3493)	-
Os06g0162550	193.075	147.425	297.396	90.9293	96.9925	66.0262	212.632	84.6493	1.33093	1.15945e-05	0.000161349	-	6	3148015	3153030	-	1719	protein_coding	PF03055:Retinal pigment epithelial membrane protein	RPE65
Os10g0400500	20.9244	22.3679	28.37	5.75502	0.969925	0.929946	23.8874	2.55163	3.30911	1.17594e-05	0.000163565	-	10	13524417	13525925	-	1509	protein_coding	PF00282:Pyridoxal-dependent decarboxylase conserved domain	-
Os07g0536300	60.8709	52.8695	46.9573	13.812	21.3383	18.5989	53.5659	17.9164	1.57072	1.19572e-05	0.000166078	-	7	21054353	21073720	+	693	protein_coding	-	-
Os07g0154100	29.4844	24.4013	59.6749	6.90602	4.84962	8.36951	37.8535	6.70838	2.49563	1.20812e-05	0.000167662	-	7	2870686	2872829	+	2144	protein_coding	PF03055:Retinal pigment epithelial membrane protein	RPE65
Os06g0560300	270.115	209.445	395.224	138.12	106.692	142.282	291.594	129.031	1.17711	1.20829e-05	0.000167662	-	6	21419757	21421894	-	1239	protein_coding	PF02365:No apical meristem (NAM) protein	NAM
Os01g0873200	22.8266	42.7023	20.5438	82.8722	98.9323	69.7459	28.6909	83.8502	-1.55088	1.21245e-05	0.00016816	-	1	37866333	37868311	+	1979	protein_coding	PF13537:Glutamine amidotransferase domain	-
Os03g0287100	166.444	168.776	229.895	109.345	83.4135	65.0962	188.372	85.9517	1.13833	1.22043e-05	0.000169185	-	3	9904631	9907008	-	1130	protein_coding	PF02121:Phosphatidylinositol transfer protein	IP_trans
Os08g0345500	1.90222	1.01672	1.95655	27.6241	25.218	12.0893	1.62516	21.6438	-3.72228	1.25363e-05	0.000173705	-	8	15642407	15645945	-	3446	protein_coding	PF03552:Cellulose synthase|PF14570:RING/Ubox like zinc-binding domain	-
Os12g0265100	216.853	404.655	390.332	111.647	121.241	181.339	337.28	138.076	1.28555	1.27663e-05	0.000176723	-	12	9397067	9400391	-	1202	protein_coding	PF05368:NmrA-like family	NmrA
Os11g0146200	124.595	37.6187	54.7835	185.312	225.992	355.239	72.3325	255.514	-1.81977	1.28323e-05	0.0001775	-	11	2090804	2094502	-	2866	protein_coding	-	-
Os04g0507950	589.687	302.983	384.463	845.987	811.827	1158.71	425.711	938.842	-1.14081	1.28347e-05	0.0001775	-	4	25380760	25381350	+	591	protein_coding	-	-
Os11g0242400	85.5997	69.1371	67.5011	136.969	157.128	293.863	74.0793	195.987	-1.40562	1.30567e-05	0.000180055	-	11	7639863	7642949	-	1092	protein_coding	PF13806:Rieske-like [2Fe-2S] domain	-
Os11g0538400	21.8755	15.2508	22.5004	73.6642	46.5564	58.5866	19.8756	59.6024	-1.57744	1.31709e-05	0.000181456	-	11	19635307	19638047	+	2608	protein_coding	-	-
Os11g0541600	34.2399	19.3177	40.1094	72.5132	90.203	88.3449	31.2223	83.687	-1.42161	1.34648e-05	0.000185066	-	11	19858668	19870853	+	1497	protein_coding	PF03140:Plant protein of unknown function	-
Os08g0323400	1.90222	7.11705	1.95655	11.51	42.6767	56.7267	3.65861	36.9711	-3.35498	1.38631e-05	0.000190179	-	8	14157905	14158861	-	957	protein_coding	PF00301:Rubredoxin	Rubredoxin
Os03g0165900	7.60887	9.15049	11.7393	46.0401	29.0977	38.1278	9.49956	37.7552	-1.98747	1.39246e-05	0.000190933	-	3	3555490	3558352	-	1367	protein_coding	-	-
Os05g0484800	316.719	319.251	218.156	994.467	575.165	476.132	284.708	681.921	-1.25904	1.39507e-05	0.000191178	-	5	23825696	23826622	-	927	protein_coding	PF04525:LURP-one-related	-
Os01g0805300	36.1421	41.6856	24.4569	73.6642	82.4436	120.893	34.0949	92.3336	-1.44197	1.41069e-05	0.000193067	-	1	34139768	34141211	+	1191	protein_coding	PF01789:PsbP	-
Os01g0668600	172.151	252.147	254.352	125.459	92.1428	116.243	226.217	111.282	1.02499	1.43115e-05	0.000195682	-	1	27375122	27377698	-	2577	protein_coding	PF00954:S-locus glycoprotein domain|PF01453:D-mannose binding lectin|PF00069:Protein kinase domain	B_lectin
Os12g0218300	106.524	86.4213	105.654	26.4731	25.218	53.9369	99.5331	35.2093	1.49023	1.4352e-05	0.000196143	-	12	6324997	6325660	+	664	protein_coding	-	-
Os12g0599700	27.5821	50.8361	56.7401	14.963	7.7594	9.29946	45.0528	10.674	2.09309	1.43685e-05	0.000196278	-	12	25233296	25234195	-	568	protein_coding	-	-
Os03g0703300	103.671	134.207	132.067	202.577	230.842	322.691	123.315	252.037	-1.03425	1.4892e-05	0.000203142	-	3	28260587	28266450	-	2205	protein_coding	-	-
Os07g0237700	168.346	90.4882	167.285	283.147	304.556	318.041	142.04	301.915	-1.08697	1.49664e-05	0.000203964	-	7	7666323	7667386	-	596	protein_coding	-	-
Os04g0611200	52.311	112.856	53.8052	9.20803	27.1579	8.36951	72.9908	14.9118	2.28324	1.49796e-05	0.000204048	-	4	30995338	30999600	+	1801	protein_coding	PF02458:Transferase family	-
Os08g0448000	1264.02	1261.75	1706.11	471.911	535.398	917.857	1410.63	641.722	1.13535	1.50186e-05	0.000204483	-	8	21873076	21875497	-	1978	protein_coding	PF13193:AMP-binding enzyme C-terminal domain|PF00501:AMP-binding enzyme	AMP-binding
Os06g0692600	374.737	202.328	251.417	509.894	552.857	632.363	276.16	565.038	-1.03249	1.50499e-05	0.000204813	-	6	28898441	28901943	-	3503	protein_coding	PF00069:Protein kinase domain|PF13855:Leucine rich repeat|PF08263:Leucine rich repeat N-terminal domain	Pkinase
Os05g0438800	1299.21	882.514	1005.67	2921.25	1951.49	1670.18	1062.47	2180.97	-1.03704	1.50637e-05	0.000204905	-	5	21500616	21504228	-	1817	protein_coding	PF00022:Actin	Actin
Os03g0735000	17.1199	20.3344	8.80449	41.4361	51.406	79.9753	15.4196	57.6058	-1.90787	1.5126e-05	0.000205655	AGPL1	3	30099369	30104572	-	2071	protein_coding	PF00483:Nucleotidyl transferase	-
Os06g0705100	25.6799	18.301	14.6742	41.4361	70.8045	81.8352	19.5517	64.6919	-1.72988	1.57964e-05	0.000214068	-	6	29789098	29790631	+	1170	protein_coding	-	-
novel.140	41.8488	46.7692	50.8704	94.3823	89.2331	123.683	46.4961	102.433	-1.14237	1.67227e-05	0.000225776	-	1	41561752	41563979	+	1979	-	-	-
Os07g0448400	144.568	117.94	107.61	362.566	228.902	212.958	123.373	268.142	-1.11671	1.6737e-05	0.000225864	-	7	15376916	15378289	+	618	protein_coding	PF00230:Major intrinsic protein	-
Os05g0460600	4.75554	2.03344	4.89138	16.114	28.1278	37.1978	3.89346	27.1466	-2.8022	1.68925e-05	0.000227644	-	5	22625667	22629028	-	2595	protein_coding	PF00926:3,4-dihydroxy-2-butanone 4-phosphate synthase	DHBP_synthase
Os03g0794000	143.617	170.809	217.177	82.8722	88.2631	43.7075	177.201	71.6143	1.31105	1.78392e-05	0.000239289	-	3	33028009	33029105	+	675	protein_coding	PF14368:Probable lipid transfer	-
Os01g0940600	4.75554	13.2174	6.84794	26.4731	36.8571	66.0262	8.27362	43.1188	-2.39479	1.80629e-05	0.000241869	-	1	41343327	41344264	+	837	protein_coding	-	-
Os01g0805200	77.9909	75.2374	75.3273	113.949	194.955	252.945	76.1852	187.283	-1.30099	1.81875e-05	0.000243287	-	1	34138399	34139709	-	911	protein_coding	PF11460:Protein of unknown function (DUF3007)	-
Os02g0503900	109.377	257.231	305.222	1904.91	1667.3	629.573	223.943	1400.59	-2.64488	1.82699e-05	0.000244275	-	2	17873662	17875911	+	1761	protein_coding	PF00067:Cytochrome P450	p450
Os07g0153000	58.0176	72.1872	98.806	17.265	29.0977	31.6182	76.3369	25.9936	1.5422	1.85407e-05	0.000247668	-	7	2801920	2803989	-	459	protein_coding	PF06200:tify domain	Zim
Os04g0509400	385.199	325.351	305.222	150.781	128.03	222.257	338.591	167.023	1.0176	1.89885e-05	0.000253416	-	4	25492298	25493120	+	694	protein_coding	PF05899:Protein of unknown function (DUF861)	Cupin_3
Os03g0290300	1339.16	1298.35	1891.99	2550.62	2600.37	4446.07	1509.83	3199.02	-1.0834	1.90722e-05	0.000254416	-	3	10080334	10082679	-	999	protein_coding	PF00487:Fatty acid desaturase	-
Os04g0688600	4.75554	8.13377	11.7393	26.4731	43.6466	38.1278	8.20955	36.0825	-2.14371	1.9223e-05	0.000256192	-	4	35221653	35223996	-	2254	protein_coding	PF00141:Peroxidase	-
EPlOSAG00000014598	377.59	670.019	249.461	1284.52	1342.38	836.951	432.357	1154.62	-1.41729	1.92778e-05	0.000256686	-	10	16634757	16634875	-	119	ncRNA	-	-
Os11g0126900	207.342	125.057	243.591	48.3421	91.1729	79.9753	191.996	73.1635	1.3872	1.98533e-05	0.000264106	-	11	1233932	1235977	+	1653	protein_coding	PF02365:No apical meristem (NAM) protein	NAM
Os08g0130400	33.2888	19.3177	27.3918	55.2482	76.624	91.1347	26.6661	74.3356	-1.48059	2.00306e-05	0.00026622	-	8	1716498	1719881	-	1866	protein_coding	PF00501:AMP-binding enzyme	AMP-binding
Os08g0342300	298.648	260.281	393.267	127.761	111.541	195.289	317.399	144.864	1.12954	2.02962e-05	0.00026901	-	8	15431639	15435283	-	3645	protein_coding	PF13855:Leucine rich repeat|PF08263:Leucine rich repeat N-terminal domain|PF00069:Protein kinase domain	LRRNT_2
Os02g0729400	90.3553	143.358	107.61	181.859	279.338	432.425	113.774	297.874	-1.39127	2.04114e-05	0.000270044	-	2	30361908	30363528	-	1153	protein_coding	-	-
Os03g0186900	422.292	925.217	500.878	1522.78	1467.5	1211.72	616.129	1400.66	-1.18506	2.09875e-05	0.000277034	-	3	4541351	4543092	+	1742	protein_coding	PF14541:Xylanase inhibitor C-terminal|PF14543:Xylanase inhibitor N-terminal	-
Os08g0240500	101.769	137.257	52.827	338.395	305.526	184.129	97.2843	276.017	-1.50416	2.11285e-05	0.000278703	-	8	8488370	8489782	+	690	protein_coding	PF00722:Glycosyl hydrolases family 16|PF06955:Xyloglucan endo-transglycosylase (XET) C-terminus	-
Os04g0326201	37.0932	81.3377	61.6314	23.0201	14.5489	9.29946	60.0208	15.6228	1.95796	2.1141e-05	0.000278703	-	4	15120363	15121909	-	1525	protein_coding	PF00201:UDP-glucoronosyl and UDP-glucosyl transferase	UDPGT
Os10g0475000	31.3866	37.6187	47.9356	123.157	70.8045	105.084	38.9803	99.6819	-1.35226	2.13384e-05	0.00028077	-	10	17684668	17688595	-	3928	protein_coding	-	-
Os03g0280400	32.3377	16.2675	20.5438	63.3052	67.8947	61.3764	23.0497	64.1921	-1.47309	2.14231e-05	0.000281638	-	3	9575359	9576627	+	715	protein_coding	-	-
Os05g0338933	169.297	346.702	209.351	78.2682	125.12	74.3957	241.784	92.5947	1.38276	2.19597e-05	0.000288291	-	5	15866499	15866891	+	393	protein_coding	-	-
Os05g0560000	151.226	199.277	133.046	239.409	425.797	760.696	161.183	475.3	-1.56166	2.21994e-05	0.000291306	-	5	27878662	27879543	+	676	protein_coding	PF03244:Photosystem I reaction centre subunit VI	-
Os01g0959750	89.4042	67.1036	66.5228	24.1711	32.9774	32.5481	74.3435	29.8989	1.30762	2.22898e-05	0.000292228	-	1	42301803	42302292	+	490	protein_coding	-	-
Os12g0189400	128.4	158.609	137.937	196.822	360.812	417.546	141.648	325.06	-1.20098	2.23446e-05	0.000292814	-	12	4506779	4507716	+	656	protein_coding	PF05479:Photosystem I reaction centre subunit N (PSAN or PSI-N)	-
novel.186	70.382	84.3879	91.958	294.657	161.977	148.791	82.2426	201.809	-1.29192	2.25051e-05	0.000294783	-	1	10210989	10213016	-	1944	-	PF01565:FAD binding domain	FAD_binding_4
Os12g0455000	12.3644	45.7525	14.6742	78.2682	111.541	93.9245	24.2637	94.578	-1.96933	2.26772e-05	0.000296501	-	12	15788561	15789140	+	580	protein_coding	-	-
Os09g0472100	172.151	143.358	215.221	56.3992	76.624	101.364	176.91	78.1291	1.17304	2.2934e-05	0.000299589	-	9	18034121	18039233	+	2466	protein_coding	PF01061:ABC-2 type transporter|PF00005:ABC transporter	ABC2_membrane
Os02g0176300	27.5821	16.2675	12.7176	42.5871	65.9549	109.734	18.8558	72.7585	-1.95013	2.30476e-05	0.000300938	-	2	4182680	4184658	+	1979	protein_coding	-	-
Os04g0546800	2478.59	2635.34	3665.6	1060.07	964.105	1903.6	2926.51	1309.26	1.16007	2.32021e-05	0.000302819	-	4	27371324	27372855	-	1532	protein_coding	PF00847:AP2 domain	AP2
Os11g0224040	43.751	75.2374	71.4142	25.3221	16.4887	22.3187	63.4675	21.3765	1.57451	2.34506e-05	0.000305649	-	11	6478122	6480430	-	2035	protein_coding	-	-
Os06g0113800	87.502	63.0367	60.6532	20.7181	23.2782	33.4781	70.3973	25.8248	1.43875	2.35306e-05	0.000306499	-	6	786863	787404	-	542	protein_coding	PF01466:Skp1 family, dimerisation domain|PF03931:Skp1 family, tetramerisation domain	Skp1
Os05g0586050	19.0222	12.2007	16.6307	37.9831	64.9849	50.2171	15.9512	51.0617	-1.67992	2.40268e-05	0.000312176	-	5	29164084	29165467	-	1303	protein_coding	PF03140:Plant protein of unknown function	-
Os05g0269200	27.5821	10.1672	8.80449	67.9092	46.5564	69.7459	15.5179	61.4038	-1.97775	2.42427e-05	0.000314559	-	5	10814438	10816932	-	1376	protein_coding	PF03595:Voltage-dependent anion channel	C4dic_mal_tran
Os03g0641200	41.8488	21.3512	51.8487	6.90602	8.72932	9.29946	38.3495	8.3116	2.19957	2.46228e-05	0.000318919	-	3	24692974	24693660	-	687	protein_coding	PF13906:C-terminus of AA_permease	-
novel.731	43.751	19.3177	36.1962	80.5702	80.5037	132.052	33.0883	97.7088	-1.56138	2.50668e-05	0.000324235	-	12	2539234	2546086	-	1553	-	-	-
Os04g0538166	20.9244	31.5184	22.5004	46.0401	82.4436	158.091	24.981	95.5248	-1.941	2.65023e-05	0.000341584	-	4	26920269	26920691	-	423	protein_coding	PF00009:Elongation factor Tu GTP binding domain	GTP_EFTU
Os01g0735500	7.60887	4.06689	9.78277	32.2281	21.3383	84.6251	7.15284	46.0638	-2.68744	2.65656e-05	0.000342248	-	1	30675734	30677421	+	1688	protein_coding	PF00201:UDP-glucoronosyl and UDP-glucosyl transferase	UDPGT
Os07g0489200	23.7777	22.3679	21.5221	1.151	3.8797	4.64973	22.5559	3.22681	2.76407	2.67979e-05	0.000345087	-	7	18113479	18115173	-	1695	protein_coding	PF00201:UDP-glucoronosyl and UDP-glucosyl transferase	UDPGT
Os04g0573000	22.8266	34.5685	45.0007	1.151	3.8797	10.2294	34.132	5.0867	2.70369	2.69354e-05	0.000346396	-	4	28862600	28868988	+	2705	protein_coding	PF03105:SPX domain|PF07690:Major Facilitator Superfamily	SPX
Os06g0234400	28.5332	28.4682	30.3266	2.30201	6.78947	8.36951	29.1093	5.82033	2.28772	2.69908e-05	0.000346954	-	6	7000436	7001602	-	1167	protein_coding	PF14416:PMR5 N terminal Domain|PF13839:GDSL/SGNH-like Acyl-Esterase family found in Pmr5 and Cas1p	-
Os03g0804900	155.982	387.371	238.7	107.043	110.571	84.6251	260.684	100.747	1.37189	2.74544e-05	0.000352757	-	3	33599055	33600984	-	1623	protein_coding	PF00201:UDP-glucoronosyl and UDP-glucosyl transferase	UDPGT
Os04g0370100	155.982	109.806	121.306	43.7381	63.0451	68.816	129.031	58.5331	1.13393	2.76821e-05	0.000355234	-	4	18001019	18005396	-	2649	protein_coding	PF00069:Protein kinase domain|PF13947:Wall-associated receptor kinase galacturonan-binding	Pkinase
Os02g0643500	84.6486	79.3043	91.958	141.573	181.376	332.921	85.3036	218.623	-1.36015	2.79863e-05	0.000358637	-	2	25855643	25859028	+	1080	protein_coding	PF00805:Pentapeptide repeats (8 copies)	Pentapeptide
Os12g0420200	51.3598	43.719	25.4352	67.9092	139.669	206.448	40.1714	138.009	-1.78333	2.80642e-05	0.000359477	-	12	13103675	13106278	+	1476	protein_coding	PF01370:NAD dependent epimerase/dehydratase family	Epimerase
Os02g0280200	23.7777	59.9866	10.761	115.1	129	133.912	31.5084	126.004	-2.00368	2.86977e-05	0.000367429	-	2	10359560	10360971	+	900	protein_coding	PF00722:Glycosyl hydrolases family 16	-
Os02g0820200	67.5287	111.839	64.5663	32.2281	17.4586	32.5481	81.3114	27.4116	1.57097	2.89101e-05	0.000369985	-	2	35216593	35217767	+	1175	protein_coding	PF13639:Ring finger domain	-
Os07g0277200	31.3866	33.5518	35.218	81.7212	93.1128	62.3064	33.3854	79.0468	-1.24224	2.93345e-05	0.000374755	-	7	10374377	10375097	-	721	protein_coding	-	-
Os04g0664900	54.2132	38.6354	42.0659	94.3823	89.2331	104.154	44.9715	95.9231	-1.09146	2.94633e-05	0.000376069	-	4	33943991	33946513	-	1870	protein_coding	PF00251:Glycosyl hydrolases family 32 N-terminal domain	-
Os06g0147250	54.2132	27.4515	35.218	96.6843	118.331	82.7652	38.9609	99.2601	-1.34575	3.00837e-05	0.000383313	-	6	2462234	2462587	+	354	protein_coding	-	-
Os03g0826900	3.80443	5.08361	1.95655	20.7181	18.4286	33.4781	3.61486	24.2082	-2.75192	3.02132e-05	0.000384624	-	3	34739011	34740504	-	1285	protein_coding	-	-
Os12g0150200	224.462	258.247	786.535	79.4192	138.699	134.842	423.081	117.654	1.84459	3.11644e-05	0.000396038	-	12	2467929	2469700	-	1772	protein_coding	PF00067:Cytochrome P450	p450
Os04g0633900	111.28	79.3043	149.676	43.7381	52.3759	44.6374	113.42	46.9171	1.27288	3.1628e-05	0.000401401	-	4	32248949	32253028	-	2505	protein_coding	PF08276:PAN-like domain|PF00954:S-locus glycoprotein domain|PF00069:Protein kinase domain|PF01453:D-mannose binding lectin	Pkinase
Os06g0146700	30.4355	19.3177	25.4352	63.3052	60.1353	65.0962	25.0628	62.8456	-1.32298	3.2082e-05	0.000406629	-	6	2446226	2447357	-	1059	protein_coding	-	-
Os01g0843800	116.035	158.609	192.721	71.3622	40.7368	78.1155	155.788	63.4048	1.29785	3.21519e-05	0.000407159	-	1	36236705	36239144	+	2061	protein_coding	PF00394:Multicopper oxidase|PF07732:Multicopper oxidase	-
novel.1178	28.5332	24.4013	43.0442	4.60401	7.7594	8.36951	31.9929	6.91097	2.19379	3.21661e-05	0.000407161	-	3	1190059	1192071	-	1942	-	PF00141:Peroxidase	-
Os06g0221300	57.0665	44.7357	51.8487	104.741	93.1128	115.313	51.217	104.389	-1.02618	3.30088e-05	0.000416736	-	6	6253707	6254494	-	788	protein_coding	PF01477:PLAT/LH2 domain	-
Os06g0295000	72.2842	48.8026	82.1753	19.5671	15.5188	31.6182	67.754	22.2347	1.60172	3.48827e-05	0.000438675	-	6	10871810	10875144	-	2532	protein_coding	PF13962:Domain of unknown function	-
Os05g0291700	98.9153	118.956	69.4577	162.291	227.932	469.623	95.7764	286.615	-1.58346	3.56993e-05	0.000448166	-	5	12833493	12839420	-	2051	protein_coding	PF13460:NAD(P)H-binding	-
Os03g0375966	67.5287	98.622	136.959	34.5301	36.8571	44.6374	101.036	38.6749	1.38134	3.60654e-05	0.00045237	-	3	14838184	14839122	-	939	protein_coding	PF13520:Amino acid permease	-
Os01g0217000	304.355	513.444	581.096	219.842	205.624	252.015	466.298	225.827	1.0453	3.62113e-05	0.000454004	-	1	6387691	6391467	-	1769	protein_coding	PF13839:GDSL/SGNH-like Acyl-Esterase family found in Pmr5 and Cas1p|PF14416:PMR5 N terminal Domain	-
Os04g0568950	6.65776	124.04	156.524	3.45301	0.969925	2.78984	95.7407	2.40426	5.32537	3.64429e-05	0.00045671	-	4	28595198	28595688	+	491	protein_coding	-	-
Os12g0204500	165.493	168.776	191.742	72.5132	61.1052	112.523	175.337	82.0473	1.0917	3.6513e-05	0.000457391	-	12	5455305	5456824	-	1520	protein_coding	PF04669:Polysaccharide biosynthesis	-
Os08g0532800	35.191	34.5685	57.7183	216.389	179.436	61.3764	42.4926	152.4	-1.84006	3.67756e-05	0.000460282	-	8	26554159	26557021	-	986	protein_coding	PF14368:Probable lipid transfer	-
Os03g0351200	39.9465	46.7692	62.6097	104.741	95.0526	126.473	49.7752	108.756	-1.1293	3.79284e-05	0.000473892	-	3	13155851	13157256	-	1344	protein_coding	PF13460:NAD(P)H-binding	-
Os06g0513943	37.0932	26.4348	13.6959	370.623	3452.93	68.816	25.7413	1297.46	-5.65533	3.85523e-05	0.000480859	-	6	18615724	18616592	-	575	protein_coding	-	-
Os06g0523300	161.688	158.609	174.133	47.1911	97.9624	79.9753	164.81	75.043	1.12754	3.87578e-05	0.000483214	-	6	19333952	19334517	-	566	protein_coding	-	-
Os11g0591300	318.621	491.076	862.84	248.617	223.083	185.059	557.513	218.92	1.34938	3.89223e-05	0.000484848	-	11	22468593	22471382	+	1458	protein_coding	PF08541:3-Oxoacyl-[acyl-carrier-protein (ACP)] synthase III C terminal|PF08392:FAE1/Type III polyketide synthase-like protein	-
novel.843	10.4622	13.2174	8.80449	46.0401	56.2556	25.1085	10.828	42.4681	-1.97097	4.02156e-05	0.000500314	-	2	11092543	11097986	+	2487	-	PF00657:GDSL-like Lipase/Acylhydrolase	Lipase_GDSL
Os11g0306400	203.537	711.705	452.942	127.761	195.925	79.0454	456.061	134.244	1.76428	4.10094e-05	0.000509532	-	11	11591738	11596168	-	1264	protein_coding	PF00891:O-methyltransferase|PF08100:Dimerisation domain	-
Os01g0605700	360.47	470.742	700.446	268.184	226.962	128.333	510.553	207.826	1.29874	4.1113e-05	0.0005106	-	1	23864681	23867205	+	991	protein_coding	PF03083:Sugar efflux transporter for intercellular exchange	-
Os10g0136400	32.3377	13.2174	27.3918	2.30201	4.84962	2.78984	24.3156	3.31382	2.86423	4.21465e-05	0.00052244	-	10	2249407	2252236	-	1985	protein_coding	PF01657:Salt stress response/antifungal|PF07714:Protein tyrosine kinase	Pkinase_Tyr
Os03g0271500	53.2621	54.903	45.0007	90.9293	100.872	122.753	51.0553	104.851	-1.04186	4.21662e-05	0.00052244	-	3	9079602	9081544	+	1331	protein_coding	-	-
Os02g0666000	13.3155	15.2508	20.5438	80.5702	49.4662	37.1978	16.3701	55.7447	-1.76107	4.22602e-05	0.000523055	-	2	27035398	27036001	-	604	protein_coding	-	-
Os11g0153500	38.9954	44.7357	45.979	16.114	2.90977	12.0893	43.2367	10.371	2.07826	4.28919e-05	0.000530421	-	11	2506941	2508402	+	1212	protein_coding	PF11250:Fantastic Four meristem regulator	-
Os03g0400700	48.5065	41.6856	61.6314	103.59	94.0827	126.473	50.6078	108.049	-1.09468	4.37286e-05	0.000539942	-	3	16250380	16251580	-	602	protein_coding	-	-
Os03g0305400	19.9733	13.2174	42.0659	96.6843	116.391	57.6566	25.0855	90.244	-1.84439	4.40906e-05	0.000543853	-	3	10839459	10840785	-	1000	protein_coding	PF00582:Universal stress protein family	Usp
Os04g0490800	77.0398	101.672	97.8277	140.422	216.293	370.118	92.1799	242.278	-1.39701	4.48775e-05	0.000552618	-	4	24527988	24530505	-	1374	protein_coding	PF13344:Haloacid dehalogenase-like hydrolase|PF13242:HAD-hyrolase-like	-
Os10g0372300	11.4133	3.05016	3.91311	25.3221	35.8872	32.5481	6.12552	31.2525	-2.34316	4.74126e-05	0.000581885	-	10	11791821	11792120	+	300	protein_coding	-	-
novel.1600	18.0711	16.2675	16.6307	40.2851	46.5564	55.7968	16.9898	47.5461	-1.48823	4.75605e-05	0.00058318	-	5	29064345	29066176	+	1601	-	PF03106:WRKY DNA -binding domain	WRKY
Os07g0510833	24.7288	25.418	23.4786	64.4562	91.1729	47.4272	24.5418	67.6854	-1.46348	4.77107e-05	0.000584774	-	7	19491973	19492375	+	303	protein_coding	PF07732:Multicopper oxidase	-
novel.960	59.9198	100.655	140.872	28.7751	44.6165	29.7583	100.482	34.3833	1.54375	4.85964e-05	0.000595378	-	2	8683002	8690580	-	6019	-	-	-
Os08g0106300	36.1421	62.02	45.0007	1.151	16.4887	2.78984	47.721	6.80985	2.78749	4.86683e-05	0.000596007	-	8	319646	321012	+	894	protein_coding	PF00067:Cytochrome P450	p450
Os10g0516100	22.8266	29.4849	14.6742	48.3421	89.2331	63.2363	22.3286	66.9372	-1.58945	4.88889e-05	0.000597951	-	10	19894753	19896794	+	824	protein_coding	PF01597:Glycine cleavage H-protein	-
Os07g0243800	16.1688	6.10033	24.4569	39.1341	61.1052	111.594	15.5754	70.611	-2.18124	4.93852e-05	0.000603766	-	7	8009180	8009857	-	678	protein_coding	PF00188:Cysteine-rich secretory protein family	SCP
Os02g0608550	86.5509	231.812	245.548	81.7212	52.3759	52.077	187.97	62.058	1.60241	5.00927e-05	0.000611384	-	2	23885640	23886555	+	777	protein_coding	PF13710:ACT domain	-
Os04g0654400	36.1421	34.5685	23.4786	75.9662	63.0451	86.485	31.3964	75.1654	-1.25986	5.11118e-05	0.000621989	-	4	33374335	33375212	-	800	protein_coding	-	-
Os06g0608700	39.9465	48.8026	45.0007	74.8152	129.97	100.434	44.5833	101.74	-1.19519	5.18619e-05	0.000630587	-	6	24227136	24229290	+	1642	protein_coding	PF00274:Fructose-bisphosphate aldolase class-I	-
Os03g0180900	1008.17	1045.19	1856.77	364.868	547.037	745.817	1303.38	552.574	1.23706	5.3244e-05	0.000646453	-	3	4236724	4238058	+	1110	protein_coding	PF09425:Divergent CCT motif|PF06200:tify domain	Zim
novel.1580	360.47	204.361	249.461	111.647	113.481	159.021	271.431	128.05	1.08226	5.33918e-05	0.00064756	-	5	24017850	24022117	+	4078	-	-	-
Os04g0683900	61.822	66.0869	88.0449	130.063	132.88	204.588	71.9846	155.844	-1.11695	5.35107e-05	0.000648459	-	4	34922245	34926223	-	2984	protein_coding	PF03479:Domain of unknown function (DUF296)	-
Os02g0567800	69.4309	105.739	127.176	41.4361	32.0075	48.3572	100.782	40.6003	1.31034	5.3852e-05	0.000652051	-	2	21587767	21589017	+	1251	protein_coding	PF07859:alpha/beta hydrolase fold	Abhydrolase_3
Os01g0940700	322.426	379.237	417.724	483.421	867.113	1106.64	373.129	819.056	-1.1353	5.52208e-05	0.000667046	-	1	41346647	41348373	+	1297	protein_coding	PF00332:Glycosyl hydrolases family 17	Glyco_hydro_17
Os06g0335900	69.4309	157.592	31.3049	299.261	290.007	292.003	86.1092	293.757	-1.77179	5.54611e-05	0.00066874	-	6	13389882	13390271	+	390	protein_coding	PF06955:Xyloglucan endo-transglycosylase (XET) C-terminus	-
Os03g0360600	41.8488	35.5853	28.37	58.7012	99.9022	168.32	35.268	108.975	-1.63128	5.61932e-05	0.000676442	-	3	14006157	14007356	+	1200	protein_coding	PF02536:mTERF	-
novel.1537	65.6265	61.0033	100.763	29.9261	24.2481	34.408	75.7974	29.5274	1.35963	5.80373e-05	0.000696904	-	5	8086589	8088890	+	1545	-	PF03106:WRKY DNA -binding domain	WRKY
Os10g0181600	20.9244	16.2675	13.6959	33.3791	56.2556	91.1347	16.9626	60.2565	-1.8336	5.8304e-05	0.000699818	-	10	5592943	5595558	+	1326	protein_coding	PF08241:Methyltransferase domain	Methyltransf_11
Os03g0725200	0.951108	7.11705	3.91311	31.0771	22.3083	21.3888	3.99376	24.9247	-2.65199	5.83771e-05	0.000700404	-	3	29479234	29479879	+	646	protein_coding	-	-
Os05g0477600	39.9465	88.4548	28.37	157.687	175.556	127.403	52.2571	153.549	-1.5573	5.85993e-05	0.000702779	-	5	23495654	23497572	-	1309	protein_coding	PF03330:Lytic transglycolase|PF01357:Pollen allergen	-
Os07g0102100	26.631	34.5685	44.0225	8.05702	12.609	4.64973	35.074	8.43859	2.0575	5.93136e-05	0.00071062	-	7	122255	127934	+	3163	protein_coding	PF02705:K+ potassium transporter	K_trans
Os03g0836800	741.864	1547.45	542.944	5674.45	5528.57	2550.84	944.086	4584.62	-2.27985	5.93152e-05	0.00071062	-	3	35161307	35163174	+	1022	protein_coding	PF07687:Peptidase dimerisation domain|PF01546:Peptidase family M20/M25/M40	M20_dimer
Os02g0715000	200.684	259.264	345.332	161.14	80.5037	106.014	268.427	115.886	1.21612	5.93266e-05	0.00071062	-	2	29667743	29669572	+	1251	protein_coding	PF08246:Cathepsin propeptide inhibitor domain (I29)|PF00112:Papain family cysteine protease	Peptidase_C1
Os01g0126900	3111.08	7470.87	4541.16	2000.44	2637.22	2188.16	5041.04	2275.28	1.14756	5.93687e-05	0.00071083	-	1	1486400	1488897	+	1909	protein_coding	PF00394:Multicopper oxidase|PF07732:Multicopper oxidase|PF07731:Multicopper oxidase	-
Os09g0530000	19.9733	38.6354	23.4786	54.0972	77.594	118.103	27.3624	83.2647	-1.61307	5.9911e-05	0.000716419	-	9	20751729	20754647	+	1214	protein_coding	PF00581:Rhodanese-like domain	Rhodanese
Os09g0298200	204.488	193.177	241.634	70.2112	134.82	55.7968	213.1	86.9425	1.29208	5.99539e-05	0.000716419	AGPS1	9	7245434	7249813	-	1951	protein_coding	PF00483:Nucleotidyl transferase	-
Os01g0142100	26.631	30.5016	21.5221	46.0401	76.624	117.173	26.2183	79.9458	-1.61472	5.9959e-05	0.000716419	-	1	2266281	2271051	-	2054	protein_coding	-	-
Os07g0123100	58.9687	80.321	68.4794	272.788	168.767	106.014	69.2564	182.523	-1.39545	6.01269e-05	0.000718129	-	7	1194474	1195091	+	618	protein_coding	PF14009:Domain of unknown function (DUF4228)	-
Os10g0528100	12.3644	17.2843	21.5221	43.7381	42.6767	92.9946	17.0569	59.8031	-1.81566	6.03526e-05	0.000720231	-	10	20551209	20552361	+	1066	protein_coding	PF13410:Glutathione S-transferase, C-terminal domain|PF02798:Glutathione S-transferase, N-terminal domain	GST_N
Os12g0151750	18.0711	52.8695	24.4569	3.45301	4.84962	7.43957	31.7992	5.2474	2.57842	6.11023e-05	0.000727083	-	12	2562787	2563380	+	594	protein_coding	-	-
Os01g0102000	106.524	192.16	101.741	300.412	319.105	241.786	133.475	287.101	-1.10594	6.12307e-05	0.000728311	-	1	89763	91465	-	1703	protein_coding	PF04185:Phosphoesterase family	Phosphoesterase
Os01g0915000	211.146	391.438	483.269	829.873	666.338	871.359	361.951	789.19	-1.12486	6.17742e-05	0.000733872	-	1	39866435	39867460	-	1026	protein_coding	PF04720:PDDEXK-like family of unknown function	-
Os06g0279900	5.70665	6.10033	7.82622	26.4731	21.3383	39.9877	6.5444	29.2664	-2.1646	6.34015e-05	0.00075105	-	6	9716234	9724868	-	2873	protein_coding	PF00931:NB-ARC domain	NB-ARC
Os01g0341750	39.9465	42.7023	13.6959	95.5333	102.812	83.6951	32.1149	94.0135	-1.54999	6.36402e-05	0.000752987	-	1	13487892	13506871	-	2013	protein_coding	PF01657:Salt stress response/antifungal	-
Os06g0528700	36.1421	32.5351	41.0876	13.812	11.6391	6.50962	36.5883	10.6536	1.79776	6.43201e-05	0.000760378	-	6	19619923	19621610	-	1688	protein_coding	PF00743:Flavin-binding monooxygenase-like	FMO-like
Os01g0957800	28.5332	31.5184	40.1094	11.51	6.78947	9.29946	33.387	9.19965	1.87079	6.50149e-05	0.00076734	-	1	42211884	42213685	+	1647	protein_coding	PF00067:Cytochrome P450	p450
Os01g0837200	39.9465	42.7023	43.0442	18.4161	6.78947	13.0192	41.8977	12.7416	1.73493	6.51945e-05	0.000769147	-	1	35894448	35895172	+	452	protein_coding	PF12146:Serine aminopeptidase, S33	-
Os01g0266800	127.449	228.762	127.176	286.6	341.413	371.978	161.129	333.331	-1.05089	6.73256e-05	0.000791711	-	1	9133740	9140430	-	1826	protein_coding	PF04193:PQ loop repeat	-
novel.448	59.9198	95.5718	92.9363	179.557	137.729	184.129	82.8093	167.138	-1.01415	6.99984e-05	0.000820478	-	10	21011969	21014272	-	2227	-	PF14541:Xylanase inhibitor C-terminal|PF14543:Xylanase inhibitor N-terminal	-
Os12g0221600	124.595	102.689	107.61	54.0972	39.7669	66.0262	111.632	53.2967	1.06604	7.01806e-05	0.000822281	-	12	6576372	6577029	+	658	protein_coding	-	-
Os03g0327800	437.51	326.368	436.312	131.214	151.308	267.824	400.063	183.449	1.12196	7.02125e-05	0.000822323	-	3	11973989	11976381	-	1782	protein_coding	PF02365:No apical meristem (NAM) protein	NAM
Os12g0168700	164.542	142.341	123.263	218.691	287.098	519.84	143.382	341.876	-1.25514	7.18854e-05	0.00083988	-	12	3483918	3489140	+	3308	protein_coding	PF00501:AMP-binding enzyme	AMP-binding
Os04g0483500	564.958	686.287	1179.8	417.814	403.489	327.341	810.349	382.881	1.08213	7.33878e-05	0.000856054	-	4	24175649	24178952	-	1299	protein_coding	PF00106:short chain dehydrogenase	adh_short
Os07g0148900	160.737	191.144	96.8494	235.956	358.872	639.803	149.577	411.543	-1.46165	7.36247e-05	0.000858126	-	7	2546465	2547298	+	599	protein_coding	PF01241:Photosystem I psaG / psaK	-
Os07g0212200	20.9244	15.2508	19.5655	48.3421	41.7068	65.0962	18.5802	51.715	-1.47701	7.38764e-05	0.000860714	-	7	6134016	6136740	+	1521	protein_coding	PF01370:NAD dependent epimerase/dehydratase family	Epimerase
Os02g0550800	19.0222	12.2007	24.4569	1.151	1.93985	2.78984	18.5599	1.96023	3.21449	7.4409e-05	0.000866222	-	2	20734076	20737316	+	1869	protein_coding	PF00909:Ammonium Transporter Family	Ammonium_transp
Os09g0488700	252.044	148.441	227.939	71.3622	86.3233	124.613	209.475	94.0994	1.1507	7.59257e-05	0.000882461	-	9	18850291	18853114	+	1397	protein_coding	-	-
Os03g0347900	2.85332	3.05016	2.93483	11.51	41.7068	18.5989	2.94611	23.9386	-3.0291	7.72656e-05	0.000895163	-	3	13035374	13046115	-	6210	protein_coding	PF01397:Terpene synthase, N-terminal domain|PF03936:Terpene synthase family, metal binding domain	-
novel.1309	100.817	79.3043	96.8494	40.2851	36.8571	53.0069	92.3237	43.3831	1.08647	7.77353e-05	0.000899886	-	4	6584386	6586867	+	2482	-	-	-
Os06g0641500	797.029	297.899	447.073	969.145	1258.96	1528.83	514	1252.31	-1.28463	7.97946e-05	0.000920416	-	6	26092456	26094621	+	1569	protein_coding	PF00067:Cytochrome P450	p450
EPlOSAG00000023627	7.60887	12.2007	9.78277	27.6241	31.0376	52.077	9.8641	36.9129	-1.91348	8.02604e-05	0.000925053	-	2	31446586	31446631	+	46	ncRNA	-	-
novel.498	29.4844	34.5685	42.0659	74.8152	82.4436	72.5358	35.3729	76.5982	-1.11569	8.04206e-05	0.000926531	-	11	14853193	14854016	+	824	-	-	-
Os08g0545500	6.65776	18.301	17.609	36.8321	45.5865	75.3256	14.1892	52.5814	-1.89885	8.10266e-05	0.000932401	-	8	27320678	27325475	-	981	protein_coding	PF00847:AP2 domain	AP2
Os07g0467200	516.452	864.213	1007.63	330.338	378.271	466.833	796.097	391.814	1.02172	8.17269e-05	0.000940086	-	7	16600103	16601979	-	562	protein_coding	PF09360:Iron-binding zinc finger CDGSH type	-
Os08g0521800	85.5997	106.756	155.546	208.332	219.203	315.252	115.967	247.595	-1.09599	8.20553e-05	0.00094349	-	8	25952959	25954768	-	1075	protein_coding	PF09366:Protein of unknown function (DUF1997)	-
Os11g0115400	8.55997	10.1672	7.82622	46.0401	25.218	29.7583	8.85113	33.6721	-1.92165	8.46593e-05	0.000969585	-	11	703038	703928	+	777	protein_coding	PF00234:Protease inhibitor/seed storage/LTP family	-
Os07g0115300	22.8266	19.3177	22.5004	58.7012	41.7068	74.3957	21.5482	58.2679	-1.43502	8.47304e-05	0.000970016	-	7	838070	841318	+	1601	protein_coding	PF00141:Peroxidase	-
Os09g0419600	43.751	18.301	31.3049	69.0602	86.3233	86.485	31.1189	80.6228	-1.37132	8.5069e-05	0.000973123	-	9	15094501	15095507	+	845	protein_coding	PF01485:IBR domain, a half RING-finger domain	IBR
Os02g0754400	40.8977	64.0535	40.1094	13.812	7.7594	20.4588	48.3535	14.0101	1.78151	8.52773e-05	0.000975122	-	2	31724532	31725002	-	471	protein_coding	-	-
Os12g0486800	162.64	99.6387	148.698	209.483	289.038	400.807	136.992	299.776	-1.13078	8.55413e-05	0.000977369	-	12	18111165	18113735	+	2571	protein_coding	-	-
Os01g0221600	9.51108	5.08361	3.91311	17.265	37.8271	36.2679	6.16927	30.4533	-2.30521	8.64645e-05	0.000987139	-	1	6659237	6662320	+	1575	protein_coding	PF11744:Aluminium activated malate transporter	-
Os02g0671100	174.053	87.438	202.503	451.193	638.21	1534.41	154.665	874.605	-2.4995	8.6742e-05	0.000989918	-	2	27248839	27250065	+	1227	protein_coding	PF12937:F-box-like|PF03478:Protein of unknown function (DUF295)	DUF295
Os01g0826000	141.715	84.3879	108.589	55.2482	53.3458	48.3572	111.564	52.3171	1.09587	8.87633e-05	0.0010106	-	1	35332717	35333445	+	449	protein_coding	-	-
Os01g0296166	632.487	495.143	362.941	908.142	783.699	1316.8	496.857	1002.88	-1.0134	8.88279e-05	0.00101094	-	1	10830074	10832018	-	1676	protein_coding	PF00295:Glycosyl hydrolases family 28	-
Os04g0443900	1.90222	2.03344	1.95655	6.90602	20.3684	39.9877	1.96407	22.4207	-3.52285	9.15169e-05	0.00103828	-	4	22118247	22122536	-	2338	protein_coding	PF00118:TCP-1/cpn60 chaperonin family	-
Os10g0163040	191.173	70.1538	156.524	36.8321	57.2255	53.0069	139.284	49.0215	1.50344	9.1684e-05	0.00103977	-	10	4262515	4266433	+	3838	protein_coding	PF00931:NB-ARC domain	NB-ARC
Os01g0620900	77.9909	77.2708	111.524	48.3421	37.8271	30.6882	88.9284	38.9525	1.19953	9.26518e-05	0.00104951	-	1	24741594	24742209	-	616	protein_coding	-	-
Os04g0304250	144.568	131.157	199.568	239.409	321.045	522.63	158.431	361.028	-1.18966	9.91644e-05	0.00111804	-	4	13653621	13653978	+	358	protein_coding	-	-
novel.233	331.937	336.535	250.439	95.5333	62.0752	189.709	306.303	115.772	1.40118	0.000100339	0.00113084	-	1	21407672	21409320	-	1649	-	-	-
Os04g0261400	88.4531	163.692	95.8711	279.694	288.068	190.639	116.005	252.8	-1.12433	0.000100514	0.00113193	-	4	10624933	10627828	+	2896	protein_coding	-	-
novel.1692	33.2888	12.2007	17.609	50.6441	77.594	65.0962	21.0328	64.4448	-1.61286	0.000101324	0.00114003	-	6	2455728	2457265	+	1538	-	-	-
Os08g0468100	2544.21	1935.84	2151.23	3413.88	3500.46	6809.99	2210.43	4574.78	-1.04947	0.00010135	0.00114003	-	8	23033230	23038585	+	3267	protein_coding	PF00970:Oxidoreductase FAD-binding domain|PF03404:Mo-co oxidoreductase dimerisation domain|PF00175:Oxidoreductase NAD-binding domain|PF00173:Cytochrome b5-like Heme/Steroid binding domain	FAD_binding_6
Os05g0490900	18.0711	16.2675	7.82622	26.4731	59.1654	85.555	14.0549	57.0645	-2.02697	0.000101972	0.00114613	-	5	24127396	24128452	-	889	protein_coding	-	-
Os12g0616800	6.65776	5.08361	2.93483	40.2851	25.218	15.8091	4.89207	27.1041	-2.45878	0.000102533	0.00115108	-	12	26194568	26195981	-	1414	protein_coding	PF05553:Cotton fibre expressed protein	-
Os03g0156000	9.51108	32.5351	15.6524	79.4192	73.7143	46.4973	19.2329	66.5436	-1.79411	0.000102572	0.00115108	-	3	3026522	3027521	+	778	protein_coding	PF03330:Lytic transglycolase|PF01357:Pollen allergen	-
novel.658	22.8266	19.3177	36.1962	52.9461	80.5037	70.6759	26.1135	68.0419	-1.38409	0.00010283	0.00115353	-	12	4989246	4991857	+	2612	-	-	-
Os01g0883800	7.60887	20.3344	6.84794	37.9831	40.7368	48.3572	11.5971	42.359	-1.87886	0.000104362	0.00116891	20ox2	1	38382385	38385469	+	1512	protein_coding	PF03171:2OG-Fe(II) oxygenase superfamily|PF14226:non-haem dioxygenase in morphine synthesis N-terminal	2OG-FeII_Oxy
Os09g0348600	6.65776	9.15049	3.91311	21.8691	27.1579	35.3379	6.57379	28.1216	-2.10628	0.000105567	0.00118013	-	9	10956083	10965501	+	1893	protein_coding	PF12819:Carbohydrate-binding protein of the ER|PF07714:Protein tyrosine kinase	Pkinase_Tyr
Os02g0301100	3894.79	3646.98	3216.57	1594.14	1096.01	2517.36	3586.11	1735.84	1.04662	0.000107479	0.00119966	-	2	11592365	11596449	-	1383	protein_coding	PF03083:Sugar efflux transporter for intercellular exchange	-
Os01g0356900	33.2888	15.2508	45.0007	5.75502	6.78947	6.50962	31.1801	6.35137	2.2931	0.000108236	0.00120763	-	1	14437890	14439688	-	1799	protein_coding	PF13855:Leucine rich repeat	-
Os01g0139700	16.1688	17.2843	13.6959	36.8321	42.6767	51.147	15.7163	43.5519	-1.47565	0.000110376	0.00122821	-	1	2102113	2102672	-	560	protein_coding	-	-
novel.1010	31.3866	27.4515	46.9573	10.359	4.84962	12.0893	35.2651	9.09932	1.95727	0.000110713	0.00123101	-	2	23585029	23587820	-	868	-	PF01161:Phosphatidylethanolamine-binding protein	-
Os01g0609501	53.2621	32.5351	44.0225	13.812	14.5489	15.8091	43.2732	14.7233	1.55401	0.000112154	0.0012456	-	1	24080593	24081885	+	714	protein_coding	-	-
Os02g0569000	68.4798	27.4515	39.1311	16.114	10.6692	9.29946	45.0208	12.0276	1.91967	0.000113402	0.00125877	-	2	21662608	21664276	+	1669	protein_coding	PF00067:Cytochrome P450	p450
Os02g0551600	80.8442	66.0869	83.1535	23.0201	41.7068	34.408	76.6949	33.0449	1.20542	0.000114128	0.00126558	-	2	20776247	20777084	+	838	protein_coding	-	-
Os03g0718500	7.60887	17.2843	5.86966	32.2281	41.7068	39.0577	10.2543	37.6642	-1.88704	0.00011426	0.00126656	-	3	29090580	29091512	+	933	protein_coding	PF04770:ZF-HD protein dimerisation region	ZF-HD_dimer
Os11g0164900	8.55997	4.06689	9.78277	19.5671	34.9173	42.7775	7.46988	32.4206	-2.12001	0.000115171	0.00127568	-	11	3152475	3154921	-	600	protein_coding	-	-
Os05g0575000	160.737	227.746	406.963	111.647	114.451	106.944	265.149	111.014	1.25607	0.000116986	0.00129282	-	5	28647699	28648244	+	546	protein_coding	-	-
Os04g0585900	24.7288	28.4682	26.4135	3.45301	8.72932	6.50962	26.5368	6.23065	2.068	0.000117873	0.00130113	-	4	29605677	29607174	-	1242	protein_coding	PF04570:zinc-finger of the FCS-type, C2-C2	-
Os02g0199800	17.1199	15.2508	12.7176	57.5502	49.4662	30.6882	15.0295	45.9015	-1.60408	0.00012099	0.00133047	-	2	5587185	5593645	-	3709	protein_coding	PF16016:Domain of unknown function (DUF4782)|PF02893:GRAM domain|PF00168:C2 domain	GRAM
Os10g0419600	15.2177	28.4682	6.84794	37.9831	75.6541	82.7652	16.8446	65.4675	-1.9662	0.000121849	0.00133942	-	10	14763501	14765095	-	1359	protein_coding	PF12740:Chlorophyllase enzyme	-
Os01g0221700	5.70665	5.08361	6.84794	12.661	32.0075	53.9369	5.8794	32.8685	-2.49042	0.000122456	0.00134507	-	1	6663533	6666725	+	1008	protein_coding	PF01169:Uncharacterized protein family UPF0016	-
Os12g0271700	15.2177	11.1839	6.84794	27.6241	34.9173	80.9053	11.0832	47.8155	-2.11303	0.000122516	0.00134522	-	12	9915351	9922691	-	2144	protein_coding	-	-
Os10g0538950	4.75554	5.08361	3.91311	21.8691	16.4887	31.6182	4.58409	23.3253	-2.35095	0.000124908	0.00136992	-	10	20997527	20998560	-	1034	protein_coding	PF14541:Xylanase inhibitor C-terminal|PF14543:Xylanase inhibitor N-terminal	-
novel.1327	60.8709	38.6354	48.9138	109.345	99.9022	92.0646	49.4734	100.437	-1.01701	0.000127185	0.00139331	-	4	13814766	13817737	+	2972	-	PF14476:Petal formation-expressed	-
Os04g0395800	69.4309	49.8194	86.0884	10.359	22.3083	32.5481	68.4462	21.7385	1.63876	0.000127561	0.0013969	-	4	19492605	19497140	+	919	protein_coding	PF06200:tify domain|PF09425:Divergent CCT motif	Zim
Os02g0725200	58.9687	54.903	55.7618	89.7783	111.541	166.46	56.5445	122.593	-1.1204	0.000128426	0.00140426	-	2	30144260	30148692	+	1931	protein_coding	PF00856:SET domain|PF09273:Rubisco LSMT substrate-binding	SET
Os07g0126301	208.293	638.501	516.53	3836.29	3719.66	1068.51	454.441	2874.82	-2.66136	0.000128571	0.00140488	-	7	1385340	1386095	+	756	protein_coding	PF00188:Cysteine-rich secretory protein family	SCP
novel.480	28.5332	32.5351	52.827	14.963	6.78947	9.29946	37.9651	10.3507	1.893	0.000129555	0.0014134	-	11	7262785	7263306	+	412	-	-	-
Os02g0751600	6.65776	8.13377	8.80449	18.4161	30.0677	62.3064	7.86534	36.93	-2.24002	0.000130334	0.00142083	-	2	31591221	31593106	+	1130	protein_coding	PF00254:FKBP-type peptidyl-prolyl cis-trans isomerase	FKBP_C
Os01g0237750	134.106	58.9698	53.8052	195.671	195.925	217.607	82.2938	203.068	-1.3015	0.000130839	0.00142526	-	1	7624002	7624487	-	366	protein_coding	PF05368:NmrA-like family	NmrA
novel.2229	28.5332	11.1839	16.6307	50.6441	50.4361	63.2363	18.7826	54.7722	-1.54013	0.00013318	0.00144805	-	8	16058515	16061588	-	875	-	-	-
Os05g0220500	25.6799	24.4013	27.3918	54.0972	53.3458	77.1855	25.8243	61.5428	-1.25615	0.000134005	0.00145646	-	5	7415240	7416708	+	1469	protein_coding	-	-
Os06g0713800	96.0619	130.14	129.133	294.657	163.917	260.385	118.445	239.653	-1.01587	0.000135994	0.00147642	-	6	30262971	30266841	+	1718	protein_coding	PF07821:Alpha-amylase C-terminal beta-sheet domain|PF00128:Alpha amylase, catalytic domain	-
Os06g0316300	0.951108	2.03344	0.978277	17.265	33.9474	6.50962	1.32094	19.2407	-3.87344	0.000136223	0.00147836	-	6	12212221	12213070	+	704	protein_coding	PF07172:Glycine rich protein family	-
Os08g0288200	32.3377	39.6521	34.2397	59.8522	79.5338	107.874	35.4098	82.4199	-1.22534	0.000136535	0.00148119	-	8	11442670	11453068	-	1733	protein_coding	PF00406:Adenylate kinase|PF09353:Domain of unknown function (DUF1995)	ADK
Os04g0451200	77.9909	108.789	168.264	43.7381	45.5865	56.7267	118.348	48.6838	1.27838	0.000136735	0.00148281	-	4	22481487	22483248	+	1762	protein_coding	PF00201:UDP-glucoronosyl and UDP-glucosyl transferase	UDPGT
Os04g0635500	198.782	265.364	417.724	143.875	91.1729	150.651	293.957	128.567	1.19371	0.000137624	0.00149078	-	4	32333452	32333991	-	540	protein_coding	PF12609:Wound-induced protein	-
Os12g0152100	92.2575	82.3544	79.2404	33.3791	51.406	32.5481	84.6175	39.1111	1.1104	0.000138416	0.00149823	-	12	2571700	2573888	+	1186	protein_coding	PF12146:Serine aminopeptidase, S33	-
Os01g0279700	36.1421	40.6689	30.3266	64.4562	74.6842	110.664	35.7125	83.268	-1.22675	0.000138757	0.00150089	-	1	9913390	9917318	+	2379	protein_coding	PF07690:Major Facilitator Superfamily	MFS_1
Os09g0400400	78.942	154.542	100.763	56.3992	45.5865	39.9877	111.415	47.3244	1.23888	0.000138765	0.00150089	-	9	14001271	14002927	+	1425	protein_coding	PF00107:Zinc-binding dehydrogenase|PF08240:Alcohol dehydrogenase GroES-like domain	ADH_zinc_N
novel.208	49.4576	37.6187	33.2614	98.9863	72.7443	86.485	40.1126	86.0719	-1.09714	0.000141695	0.00152886	-	1	15360750	15362573	-	1824	-	-	-
Os02g0702300	10.4622	11.1839	9.78277	35.6811	22.3083	73.4657	10.4763	43.8184	-2.06863	0.00014172	0.00152886	-	2	28928706	28932005	-	3300	protein_coding	-	-
Os06g0641575	9.51108	6.10033	6.84794	26.4731	22.3083	40.9176	7.48645	29.8997	-1.99781	0.000142455	0.00153507	-	6	26097136	26098831	+	1518	protein_coding	PF00067:Cytochrome P450	p450
Os01g0597800	127.449	192.16	148.698	59.8522	52.3759	98.5743	156.102	70.2675	1.14667	0.000143656	0.00154744	-	1	23456074	23458035	+	1962	protein_coding	PF00201:UDP-glucoronosyl and UDP-glucosyl transferase	UDPGT
novel.1203	46.6043	40.6689	54.7835	141.573	162.947	66.0262	47.3522	123.516	-1.38071	0.000144116	0.00155124	-	3	10749788	10751262	-	1143	-	-	-
Os01g0552300	53.2621	62.02	70.4359	97.8353	123.18	179.48	61.906	133.498	-1.11298	0.000144233	0.00155193	-	1	20738654	20742427	+	1363	protein_coding	PF00481:Protein phosphatase 2C	PP2C
Os08g0419100	21.8755	12.2007	43.0442	3.45301	0.969925	5.57968	25.7068	3.3342	2.94198	0.000144942	0.00155839	-	8	20038821	20041204	+	1049	protein_coding	-	-
Os03g0170500	35.191	48.8026	56.7401	70.2112	129	151.581	46.9112	116.931	-1.32279	0.000145284	0.00156091	-	3	3776809	3777621	-	813	protein_coding	PF03703:Bacterial PH domain	-
Os06g0626700	24.7288	38.6354	35.218	11.51	5.81955	10.2294	32.8607	9.18633	1.84702	0.000145391	0.00156148	-	6	25296195	25297316	-	1122	protein_coding	PF03171:2OG-Fe(II) oxygenase superfamily|PF14226:non-haem dioxygenase in morphine synthesis N-terminal	2OG-FeII_Oxy
Os06g0627500	19.0222	28.4682	20.5438	3.45301	4.84962	5.57968	22.6781	4.62744	2.27577	0.000146275	0.00156923	-	6	25347186	25348647	-	1462	protein_coding	PF13855:Leucine rich repeat	-
Os09g0500900	79.8931	129.124	99.7842	47.1911	41.7068	55.7968	102.934	48.2315	1.09072	0.0001496	0.00160017	-	9	19384657	19387021	-	1552	protein_coding	PF04526:Protein of unknown function (DUF568)|PF03188:Eukaryotic cytochrome b561	Cytochrom_B561
Os08g0553750	22.8266	17.2843	9.78277	62.1542	66.9248	33.4781	16.6312	54.1857	-1.6995	0.000149738	0.00160105	-	8	27693974	27696402	+	847	protein_coding	PF03087:Arabidopsis protein of unknown function	-
Os04g0371000	72.2842	57.9531	37.1745	118.553	109.601	123.683	55.804	117.279	-1.07061	0.000150839	0.00160749	-	4	18056917	18057576	-	660	protein_coding	PF13947:Wall-associated receptor kinase galacturonan-binding	-
Os08g0427800	89.4042	89.4715	127.176	57.5502	48.4962	41.8476	102.017	49.298	1.05504	0.000153303	0.00163195	-	8	20578141	20578677	+	291	protein_coding	-	-
Os01g0648600	106.524	79.3043	109.567	39.1341	55.2857	49.2871	98.4651	47.9023	1.0349	0.000154244	0.00164076	-	1	26170046	26171566	+	1521	protein_coding	PF00069:Protein kinase domain	Pkinase
Os01g0824000	38.9954	31.5184	25.4352	86.3252	59.1654	74.3957	31.983	73.2954	-1.19196	0.000155606	0.00165465	-	1	35192713	35194379	+	1667	protein_coding	-	-
Os07g0656700	15.2177	35.5853	33.2614	64.4562	64.015	127.403	28.0215	85.2913	-1.61163	0.000156074	0.00165779	-	7	27630736	27633075	+	979	protein_coding	PF03350:Uncharacterized protein family, UPF0114	-
Os07g0635300	197.831	120.99	146.742	299.261	240.541	507.75	155.187	349.184	-1.17018	0.000156649	0.00166269	-	7	26375648	26377615	+	1873	protein_coding	PF00067:Cytochrome P450	p450
Os07g0664500	27.5821	22.3679	31.3049	10.359	4.84962	4.64973	27.085	6.61946	2.06352	0.000157163	0.00166685	-	7	28057781	28059098	+	1207	protein_coding	PF13561:Enoyl-(Acyl carrier protein) reductase	-
Os10g0521400	383.297	410.755	743.49	195.671	180.406	309.672	512.514	228.583	1.16367	0.000157214	0.00166685	-	10	20175634	20179154	+	1388	protein_coding	PF00561:alpha/beta hydrolase fold	Abhydrolase_1
novel.56	5.70665	2.03344	4.89138	17.265	22.3083	26.0385	4.21049	21.8706	-2.37328	0.000158015	0.00167289	-	1	14952055	14953154	+	1100	-	-	-
Os09g0530275	225.413	201.311	242.613	93.2313	65.9549	149.721	223.112	102.969	1.11318	0.000158574	0.00167758	-	9	20768633	20771680	+	1308	protein_coding	PF00067:Cytochrome P450	p450
Os11g0152025	58.0176	187.077	67.5011	34.5301	26.188	31.6182	104.198	30.7787	1.75988	0.000159189	0.00168347	-	11	2448169	2448619	+	451	protein_coding	-	-
Os02g0799700	363.323	361.953	581.096	163.442	172.647	285.493	435.458	207.194	1.06951	0.000161477	0.00170556	-	2	34058141	34059033	-	893	protein_coding	-	-
Os01g0136700	6.65776	11.1839	10.761	27.6241	33.9474	33.4781	9.53425	31.6832	-1.73973	0.000161513	0.00170556	-	1	1971228	1975465	-	4238	protein_coding	PF13947:Wall-associated receptor kinase galacturonan-binding|PF14380:Wall-associated receptor kinase C-terminal	-
Os04g0385900	562.105	751.357	763.056	265.882	227.932	487.292	692.173	327.035	1.08028	0.000162427	0.00171397	-	4	18948775	18949649	+	875	protein_coding	-	-
Os07g0243150	9.51108	25.418	14.6742	40.2851	45.5865	92.9946	16.5344	59.622	-1.85937	0.000163252	0.00172142	-	7	7982657	7983155	+	499	protein_coding	PF11493:Thylakoid soluble phosphoprotein TSP9	-
Os02g0199666	35.191	48.8026	39.1311	78.2682	76.624	104.154	41.0416	86.3487	-1.07773	0.000164616	0.00173454	-	2	5577033	5577976	+	944	protein_coding	-	-
Os07g0599300	39.9465	119.973	43.0442	23.0201	15.5188	15.8091	67.6546	18.116	1.90606	0.000165786	0.00174499	-	7	24466706	24467385	-	680	protein_coding	-	-
Os05g0370300	95.1108	205.378	186.851	71.3622	68.8646	75.3256	162.446	71.8508	1.17564	0.000166647	0.00175339	-	5	17799742	17803977	-	1305	protein_coding	-	-
Os07g0604700	44.7021	46.7692	28.37	117.402	198.835	58.5866	39.9471	124.941	-1.64504	0.000166791	0.00175428	-	7	24768075	24769065	+	607	protein_coding	PF06522:NADH-ubiquinone reductase complex 1 MLRQ subunit	-
Os07g0105600	4.75554	6.10033	2.93483	14.963	26.188	27.8984	4.5969	23.0165	-2.33484	0.000170173	0.00178725	-	7	306054	306968	+	779	protein_coding	PF05757:Oxygen evolving enhancer protein 3 (PsbQ)	-
Os06g0705600	50.4087	58.9698	47.9356	12.661	27.1579	18.5989	52.4381	19.4726	1.41642	0.000170631	0.00178882	-	6	29814603	29816743	+	1644	protein_coding	PF00854:POT family	-
Os05g0181650	83.6975	39.6521	45.979	110.496	123.18	175.76	56.4429	136.479	-1.2735	0.000172372	0.00180576	-	5	4916956	4917691	-	736	protein_coding	-	-
Os06g0326000	62.7731	47.7859	78.2622	19.5671	30.0677	26.0385	62.9404	25.2244	1.31244	0.000174567	0.00182678	-	6	12758542	12763661	-	1594	protein_coding	PF03479:Domain of unknown function (DUF296)	-
Os04g0419100	13.3155	6.10033	16.6307	27.6241	66.9248	41.8476	12.0155	45.4655	-1.92034	0.000177114	0.00185075	-	4	20716594	20717566	+	973	protein_coding	-	-
Os03g0351700	48.5065	79.3043	85.1101	25.3221	28.1278	33.4781	70.9736	28.976	1.28627	0.000177357	0.00185263	-	3	13189478	13190315	+	838	protein_coding	-	-
Os03g0265400	48.5065	59.9866	61.6314	82.8722	128.03	168.32	56.7082	126.407	-1.16157	0.000178717	0.00186617	-	3	8753551	8756010	+	1300	protein_coding	PF00573:Ribosomal protein L4/L1 family	-
Os02g0129900	25.6799	21.3512	22.5004	46.0401	51.406	84.6251	23.1771	60.6904	-1.39302	0.000182447	0.00190237	-	2	1560757	1563229	+	1206	protein_coding	PF07819:PGAP1-like protein	-
Os01g0939100	57.0665	53.8862	46.9573	96.6843	88.2631	140.422	52.6367	108.456	-1.04544	0.00019018	0.00197518	-	1	41220037	41227329	+	3784	protein_coding	PF00122:E1-E2 ATPase|PF00689:Cation transporting ATPase, C-terminus|PF12515:Ca2+-ATPase N terminal autoinhibitory domain|PF00690:Cation transporter/ATPase, N-terminus|PF00702:haloacid dehalogenase-like hydrolase	E1-E2_ATPase
Os11g0257700	189.271	194.194	142.828	88.6272	95.0526	38.1278	175.431	73.9359	1.25073	0.000191891	0.00199082	-	11	8529786	8531343	+	956	protein_coding	PF03492:SAM dependent carboxyl methyltransferase	-
Os12g0486900	171.199	99.6387	114.458	192.218	275.459	325.481	128.432	264.386	-1.04245	0.000194405	0.0020133	-	12	18116036	18120679	+	1483	protein_coding	PF00069:Protein kinase domain|PF14299:Phloem protein 2	Pkinase
Os12g0511200	94.1597	135.224	80.2187	54.0972	49.4662	39.9877	103.201	47.8503	1.11201	0.000194641	0.00201384	-	12	19694851	19698144	+	1598	protein_coding	PF03006:Haemolysin-III related	-
novel.1037	22.8266	12.2007	14.6742	44.8891	47.5263	42.7775	16.5671	45.0643	-1.4388	0.000194666	0.00201384	-	2	31642790	31644922	-	856	-	-	-
Os09g0447300	2332.12	1199.73	1481.11	455.797	525.699	1084.32	1670.99	688.604	1.27834	0.00019773	0.00204336	-	9	16711022	16713794	-	1819	protein_coding	PF00067:Cytochrome P450	p450
Os01g0692200	14.2666	21.3512	12.7176	37.9831	48.4962	44.6374	16.1118	43.7056	-1.44626	0.000198898	0.00205469	-	1	28572037	28572921	+	885	protein_coding	-	-
novel.2463	13.3155	14.2341	16.6307	41.4361	34.9173	43.7075	14.7268	40.0203	-1.44231	0.000199067	0.00205512	-	Syng_TIGR_021	3736	5892	-	1682	-	PF00892:EamA-like transporter family	DUF6
Os03g0109650	37.0932	48.8026	51.8487	5.75502	10.6692	22.3187	45.9148	12.9143	1.806	0.000200545	0.00206728	-	3	563316	564412	-	529	protein_coding	PF12579:Protein of unknown function (DUF3755)	-
Os01g0142600	78.942	61.0033	113.48	43.7381	33.9474	26.0385	84.4751	34.5747	1.2977	0.000202557	0.00208729	-	1	2292239	2294340	+	2102	protein_coding	-	-
Os11g0559200	25.6799	14.2341	20.5438	5.75502	0.969925	2.78984	20.1526	3.17159	2.71319	0.00020529	0.00211319	-	11	20802978	20806262	+	2997	protein_coding	PF08263:Leucine rich repeat N-terminal domain|PF13855:Leucine rich repeat|PF07714:Protein tyrosine kinase	LRRNT_2
Os12g0210500	54.2132	73.2039	67.5011	26.4731	29.0977	32.5481	64.9727	29.373	1.13959	0.000207547	0.00213339	-	12	5775580	5776811	-	1001	protein_coding	-	-
Os06g0270950	58.0176	58.9698	52.827	25.3221	15.5188	28.8283	56.6048	23.2231	1.28641	0.00020781	0.0021347	-	6	9097130	9098554	-	1425	protein_coding	-	-
Os12g0507400	92.2575	215.545	256.309	71.3622	79.5338	74.3957	188.037	75.0972	1.32305	0.000207822	0.0021347	-	12	19481391	19482395	-	1005	protein_coding	-	-
Os01g0847100	122.693	122.007	122.285	208.332	187.195	401.737	122.328	265.755	-1.12101	0.000214602	0.00220123	-	1	36392080	36392685	+	606	protein_coding	-	-
Os05g0183100	522.158	529.712	745.447	134.667	187.195	398.947	599.106	240.27	1.31588	0.000216243	0.00221571	-	5	4998309	4999626	-	791	protein_coding	PF03106:WRKY DNA -binding domain	WRKY
Os05g0433400	14.2666	45.7525	16.6307	87.4762	91.1729	62.3064	25.5499	80.3185	-1.65634	0.000222762	0.00227206	-	5	21240878	21241617	+	642	protein_coding	PF06749:Protein of unknown function (DUF1218)	-
Os04g0584100	0.951108	2.03344	0.978277	12.661	14.5489	14.8791	1.32094	14.0297	-3.42196	0.000232217	0.00235732	-	4	29507653	29508822	-	1170	protein_coding	PF00069:Protein kinase domain	Pkinase
Os10g0345650	37.0932	52.8695	56.7401	14.963	16.4887	23.2486	48.9009	18.2335	1.41316	0.000234037	0.00237453	-	10	10337464	10342588	-	1620	protein_coding	PF04484:QWRF family	-
Os06g0621600	168.346	146.408	224.025	63.3052	61.1052	118.103	179.593	80.8378	1.14724	0.000241729	0.00244137	-	6	24954264	24959578	-	4299	protein_coding	PF00931:NB-ARC domain	NB-ARC
Os08g0125300	76.0887	50.8361	59.6749	32.2281	23.2782	25.1085	62.1999	26.8716	1.21977	0.000242987	0.0024516	-	8	1468423	1473225	+	4803	protein_coding	PF07727:Reverse transcriptase (RNA-dependent DNA polymerase)|PF13976:GAG-pre-integrase domain|PF13961:Domain of unknown function (DUF4219)|PF14223:gag-polypeptide of LTR copia-type|PF00665:Integrase core domain	RVT_2
Os06g0153100	47.5554	59.9866	91.958	29.9261	24.2481	25.1085	66.5	26.4276	1.33527	0.00024463	0.00246732	-	6	2737888	2739092	-	1084	protein_coding	-	-
Os08g0560900	236.826	310.1	213.264	322.281	553.827	884.378	253.397	586.829	-1.21286	0.000245974	0.00247657	-	8	28083386	28084239	-	854	protein_coding	-	-
Os05g0568100	65.6265	65.0702	75.3273	33.3791	30.0677	36.2679	68.6747	33.2382	1.04637	0.000249077	0.00250607	-	5	28289829	28293256	+	961	protein_coding	PF01592:NifU-like N terminal domain	-
Os09g0482200	25.6799	21.3512	28.37	50.6441	48.4962	212.028	25.1337	103.723	-2.04747	0.000251813	0.0025308	-	9	18521580	18523903	+	1608	protein_coding	PF14541:Xylanase inhibitor C-terminal|PF14543:Xylanase inhibitor N-terminal	-
Os04g0533602	22.8266	39.6521	48.9138	5.75502	15.5188	4.64973	37.1309	8.64118	2.0948	0.000251884	0.0025308	-	4	26678450	26678662	-	213	protein_coding	-	-
Os03g0781400	8.55997	12.2007	12.7176	19.5671	44.6165	62.3064	11.1594	42.1633	-1.92735	0.00025311	0.00254224	-	3	32394938	32397257	-	1372	protein_coding	PF06026:Ribose 5-phosphate isomerase A (phosphoriboisomerase A)	Rib_5-P_isom_A
Os05g0168200	29.4844	23.3846	27.3918	10.359	4.84962	6.50962	26.7536	7.23942	1.90816	0.000253533	0.0025456	-	5	4093466	4094599	-	1014	protein_coding	PF13962:Domain of unknown function	-
Os08g0432000	55.1643	35.5853	39.1311	79.4192	91.1729	92.9946	43.2935	87.8622	-1.02062	0.000254937	0.00255705	-	8	20901384	20905381	+	3998	protein_coding	-	-
Os01g0557200	101.769	128.107	116.415	66.7582	38.797	66.0262	115.43	57.1938	1.0157	0.00026917	0.00268402	-	1	21062727	21063681	-	863	protein_coding	PF12697:Alpha/beta hydrolase family	-
Os07g0604600	17.1199	7.11705	10.761	34.5301	194.955	16.739	11.666	82.0747	-2.81326	0.000280169	0.00278115	-	7	24765682	24766713	+	585	protein_coding	PF06522:NADH-ubiquinone reductase complex 1 MLRQ subunit	-
Os07g0598800	38.9954	59.9866	57.7183	18.4161	26.188	13.9492	52.2334	19.5177	1.41937	0.000280255	0.00278115	-	7	24438591	24440475	+	1879	protein_coding	PF13912:C2H2-type zinc finger	-
EPlOSAG00000023546	4.75554	3.05016	3.91311	16.114	17.4586	26.0385	3.90627	19.8704	-2.34792	0.000281953	0.00279705	-	9	3055339	3055373	+	35	ncRNA	-	-
Os07g0601000	83.6975	68.1203	65.5446	139.271	107.662	199.008	72.4541	148.647	-1.03751	0.000283212	0.00280762	-	7	24515344	24517707	-	1161	protein_coding	PF01370:NAD dependent epimerase/dehydratase family	Epimerase
Os06g0109801	18.0711	9.15049	11.7393	59.8522	22.3083	60.4465	12.987	47.5356	-1.86602	0.000283788	0.00281236	-	6	572229	574483	+	1843	protein_coding	-	-
Os05g0378200	11.4133	17.2843	13.6959	1.151	0.969925	1.85989	14.1311	1.32694	3.3964	0.000283927	0.00281278	-	5	18234846	18236501	+	1656	protein_coding	PF03514:GRAS domain family	GRAS
EPlOSAG00000021697	14.2666	13.2174	15.6524	42.5871	33.9474	39.0577	14.3788	38.5307	-1.41882	0.000285995	0.00282939	-	6	30821357	30821404	-	48	ncRNA	-	-
Os01g0247600	18.0711	13.2174	12.7176	36.8321	36.8571	44.6374	14.6687	39.4422	-1.42678	0.000299922	0.00295609	-	1	8130258	8130932	+	675	protein_coding	-	-
Os06g0264800	76.0887	108.789	52.827	105.892	217.263	359.889	79.2349	227.681	-1.52554	0.000301482	0.00296843	-	6	8751332	8752603	-	899	protein_coding	PF14159:CAAD domains of cyanobacterial aminoacyl-tRNA synthetase	-
Os02g0821600	19.0222	19.3177	20.5438	5.75502	2.90977	3.71978	19.6279	4.12819	2.27147	0.000305429	0.00300525	-	2	35267660	35270075	+	1578	protein_coding	PF01554:MatE	MatE
Os11g0211800	157.884	75.2374	174.133	582.408	3297.74	430.565	135.752	1436.91	-3.40385	0.000306851	0.00301822	-	11	5808714	5809427	+	714	protein_coding	-	-
Os08g0557200	1.90222	1.01672	3.91311	23.0201	24.2481	8.36951	2.27735	18.5459	-3.01531	0.00030812	0.00302968	-	8	27884019	27885268	-	1250	protein_coding	PF00149:Calcineurin-like phosphoesterase	Metallophos
Os05g0299600	58.9687	42.7023	49.8921	17.265	7.7594	25.1085	50.521	16.711	1.5942	0.000314199	0.00307796	-	5	13411037	13413325	-	2171	protein_coding	PF07893:Protein of unknown function (DUF1668)	-
novel.1782	13.3155	12.2007	23.4786	50.6441	35.8872	50.2171	16.3316	45.5828	-1.47828	0.000316244	0.0030959	-	6	25745112	25746772	+	1661	-	-	-
Os03g0575700	109.377	88.4548	81.197	158.838	145.489	265.035	93.0097	189.787	-1.0304	0.000318594	0.00311785	-	3	21037379	21038297	-	919	protein_coding	-	-
Os10g0482000	44.7021	32.5351	29.3483	57.5502	81.4737	172.97	35.5285	103.998	-1.55248	0.000319707	0.00312663	-	10	18190889	18191677	-	789	protein_coding	-	-
novel.206	30.4355	81.3377	15.6524	154.234	219.203	92.9946	42.4752	155.477	-1.87415	0.000320359	0.00313195	-	1	14116696	14118012	-	935	-	PF03018:Dirigent-like protein	-
Os02g0205200	125.546	211.478	100.763	367.17	451.985	210.168	145.929	343.108	-1.23372	0.0003213	0.00313903	-	2	5912613	5914192	-	1499	protein_coding	PF04862:Protein of unknown function (DUF642)	-
Os06g0695400	11.4133	6.10033	8.80449	27.6241	76.624	19.5289	8.77271	41.259	-2.23213	0.00033367	0.00324458	-	6	29035686	29038182	+	1233	protein_coding	PF00141:Peroxidase	-
Os02g0530600	40.8977	35.5853	31.3049	63.3052	73.7143	82.7652	35.9293	73.2615	-1.0307	0.000333812	0.00324487	-	2	19509828	19514935	-	2902	protein_coding	PF00644:Poly(ADP-ribose) polymerase catalytic domain|PF16589:BRCT domain, a BRCA1 C-terminus domain|PF05406:WGR domain|PF08063:PADR1 (NUC008) domain|PF02877:Poly(ADP-ribose) polymerase, regulatory domain	WGR
Os03g0704100	54.2132	63.0367	72.3925	88.6272	136.759	172.97	63.2141	132.786	-1.07546	0.000335936	0.00326273	-	3	28304985	28307930	+	1067	protein_coding	PF04755:PAP_fibrillin	-
Os12g0127800	71.3331	93.5384	109.567	31.0771	49.4662	47.4272	91.4795	42.6568	1.09208	0.000337008	0.00326827	-	12	1332841	1333568	+	728	protein_coding	PF05678:VQ motif	-
Os12g0478200	64.6754	41.6856	62.6097	102.439	97.9624	139.492	56.3236	113.298	-1.0085	0.000337592	0.00327096	-	12	17463398	17465368	-	878	protein_coding	PF02893:GRAM domain	GRAM
Os05g0555300	60.8709	57.9531	74.349	88.6272	141.609	204.588	64.391	144.941	-1.17422	0.000344662	0.00333713	-	5	27605983	27607548	-	904	protein_coding	PF00111:2Fe-2S iron-sulfur cluster binding domain	Fer2
novel.913	82.7464	51.8528	96.8494	35.6811	18.4286	36.2679	77.1495	30.1259	1.36098	0.000344684	0.00333713	-	2	30390653	30391571	+	919	-	PF13639:Ring finger domain	-
Os01g0702300	7.60887	19.3177	3.91311	34.5301	127.06	23.2486	10.2799	61.613	-2.58925	0.000345167	0.00334069	-	1	29105137	29108734	+	2160	protein_coding	PF02225:PA domain|PF00082:Subtilase family	Peptidase_S8
Os08g0440900	65.6265	72.1872	55.7618	100.137	118.331	197.149	64.5252	138.539	-1.10633	0.000347078	0.00335806	-	8	21450964	21453701	-	946	protein_coding	PF00487:Fatty acid desaturase	-
Os03g0852800	237.777	208.428	425.55	153.083	129	146.001	290.585	142.695	1.02686	0.000348845	0.00337065	-	3	35907129	35908400	+	1272	protein_coding	PF04185:Phosphoesterase family	Phosphoesterase
Os06g0705400	37.0932	16.2675	27.3918	3.45301	9.69925	1.85989	26.9175	5.00405	2.42297	0.000351276	0.00339075	-	6	29807821	29808449	+	629	protein_coding	-	-
Os06g0660400	15.2177	9.15049	5.86966	31.0771	26.188	53.0069	10.0793	36.7573	-1.86671	0.000353334	0.00340835	-	6	27209776	27210287	-	512	protein_coding	-	-
Os02g0733500	25.6799	15.2508	15.6524	47.1911	39.7669	63.2363	18.8611	50.0648	-1.40706	0.000353883	0.00341251	-	2	30579928	30580869	-	942	protein_coding	PF13499:EF-hand domain pair|PF00036:EF hand|PF13202:EF hand	efhand
Os01g0783100	5.70665	12.2007	10.761	23.0201	30.0677	52.077	9.55612	35.0549	-1.88644	0.000356107	0.00343164	-	1	33182589	33186141	+	2600	protein_coding	PF12854:PPR repeat|PF13041:PPR repeat family	-
Os07g0559100	62.7731	256.214	468.595	44.8891	38.797	34.408	262.527	39.3647	2.73825	0.000356197	0.00343164	-	7	22343365	22343942	+	578	protein_coding	-	-
novel.1200	38.9954	52.8695	67.5011	17.265	24.2481	21.3888	53.122	20.9673	1.33418	0.000359715	0.00346197	-	3	10065010	10079297	-	12363	-	PF10536:Plant mobile domain|PF10551:MULE transposase domain|PF03108:MuDR family transposase	MuDR
novel.542	8.55997	36.602	5.86966	108.194	59.1654	57.6566	17.0105	75.0054	-2.14396	0.000360144	0.00346367	-	11	27847559	27851216	+	2182	-	PF13768:von Willebrand factor type A domain	-
novel.807	15.2177	47.7859	64.5663	12.661	7.7594	9.29946	42.5233	9.90663	2.10921	0.000361602	0.00347653	-	2	2255587	2257187	+	1114	-	-	-
Os04g0323500	15.2177	11.1839	13.6959	26.4731	37.8271	62.3064	13.3658	42.2022	-1.66413	0.00036343	0.00349275	-	4	14927225	14929678	+	2454	protein_coding	-	-
novel.253	58.9687	116.923	91.958	44.8891	31.0376	39.9877	89.2832	38.6381	1.21059	0.000363529	0.00349275	-	1	27430918	27433912	-	1432	-	-	-
Os08g0348300	61.822	43.719	18.5873	103.59	114.451	101.364	41.3761	106.468	-1.36252	0.000364988	0.00350328	-	8	15825073	15833433	-	591	protein_coding	-	-
Os12g0245700	38.0443	48.8026	24.4569	111.647	81.4737	67.886	37.1013	87.0023	-1.22693	0.000368552	0.00353164	-	12	8076291	8076808	+	518	protein_coding	-	-
novel.82	4.75554	11.1839	11.7393	31.0771	28.1278	32.5481	9.22627	30.5843	-1.73435	0.000370862	0.00355025	-	1	20866220	20867057	+	747	-	-	-
Os03g0838400	69.4309	58.9698	45.979	23.0201	31.0376	16.739	58.1266	23.5989	1.30243	0.000373424	0.00357242	-	3	35238255	35241951	+	1788	protein_coding	PF00909:Ammonium Transporter Family	Ammonium_transp
novel.1853	7.60887	3.05016	7.82622	16.114	32.9774	29.7583	6.16175	26.2832	-2.09344	0.000375123	0.00358631	-	6	19116599	19148050	-	11763	-	PF00665:Integrase core domain|PF13456:Reverse transcriptase-like|PF00078:Reverse transcriptase (RNA-dependent DNA polymerase)|PF03732:Retrotransposon gag protein	RVT_1
Os08g0201500	64.6754	59.9866	72.3925	32.2281	31.0376	33.4781	65.6848	32.2479	1.02638	0.000375753	0.00359115	-	8	5878083	5879812	+	814	protein_coding	-	-
novel.485	14.2666	35.5853	27.3918	6.90602	6.78947	2.78984	25.7479	5.49511	2.242	0.000377777	0.00360595	-	11	8653999	8656823	+	1730	-	PF03492:SAM dependent carboxyl methyltransferase	-
Os04g0495000	78.942	85.4046	61.6314	44.8891	32.9774	24.1786	75.326	34.0151	1.1581	0.000377794	0.00360595	-	4	24751134	24753063	+	1122	protein_coding	PF04862:Protein of unknown function (DUF642)	-
Os04g0137450	40.8977	24.4013	51.8487	12.661	12.609	13.0192	39.0492	12.7631	1.61441	0.0003778	0.00360595	-	4	2502536	2502817	-	282	protein_coding	-	-
EPlOSAG00000011365	8.55997	2.03344	3.91311	37.9831	11.6391	33.4781	4.83551	27.7001	-2.50482	0.000379076	0.00361575	-	4	20020950	20021039	-	90	ncRNA	-	-
Os05g0151000	10.4622	7.11705	3.91311	39.1341	18.4286	29.7583	7.16412	29.107	-2.01388	0.00038116	0.00363443	-	5	2936549	2944391	-	5536	protein_coding	PF04992:RNA polymerase Rpb1, domain 6|PF04997:RNA polymerase Rpb1, domain 1|PF04990:RNA polymerase Rpb1, domain 7|PF04998:RNA polymerase Rpb1, domain 5|PF05000:RNA polymerase Rpb1, domain 4|PF04983:RNA polymerase Rpb1, domain 3|PF00623:RNA polymerase Rpb1, domain 2	-
Os05g0217700	3676.98	4425.79	7203.05	2876.36	1634.32	2946.07	5101.94	2485.58	1.03752	0.000381591	0.00363555	-	5	7249980	7251356	+	1088	protein_coding	PF03181:BURP domain	-
Os02g0199200	28.5332	38.6354	29.3483	52.9461	73.7143	86.485	32.1723	71.0485	-1.15031	0.000384094	0.003654	-	2	5566073	5567620	+	1548	protein_coding	PF00931:NB-ARC domain	NB-ARC
Os02g0503500	18.0711	31.5184	47.9356	11.51	7.7594	3.71978	32.5083	7.66307	2.10693	0.000386593	0.00367536	-	2	17848182	17852559	-	1110	protein_coding	PF13561:Enoyl-(Acyl carrier protein) reductase	-
Os02g0703600	23.7777	16.2675	20.5438	41.4361	45.5865	63.2363	20.1964	50.0863	-1.31243	0.000387465	0.00368244	-	2	28995717	28998452	+	2371	protein_coding	PF00067:Cytochrome P450	p450
novel.1828	34.2399	35.5853	52.827	86.3252	68.8646	113.453	40.884	89.5478	-1.13243	0.0003906	0.00370859	-	6	11967112	11968662	-	1551	-	-	-
novel.1990	17.1199	26.4348	48.9138	103.59	59.1654	93.9245	30.8229	85.5601	-1.47206	0.00039743	0.00376481	-	7	3239578	3241348	-	1771	-	-	-
Os04g0213100	69.4309	40.6689	90.9798	20.7181	25.218	30.6882	67.0265	25.5414	1.38673	0.000397573	0.00376493	-	4	7553316	7554203	-	888	protein_coding	-	-
Os02g0272400	42.7999	75.2374	82.1753	29.9261	28.1278	25.1085	66.7375	27.7208	1.26924	0.00040055	0.00378671	-	2	9888890	9893654	-	1243	protein_coding	-	-
Os04g0308400	0.951108	1.01672	0.978277	10.359	37.8271	4.64973	0.982036	17.6119	-4.16762	0.000410715	0.00387168	-	4	13934207	13937518	-	689	protein_coding	-	-
Os05g0380200	66.5776	29.4849	35.218	90.9293	108.632	100.434	43.7602	99.9983	-1.19	0.000412692	0.00388904	-	5	18370291	18371184	-	789	protein_coding	-	-
Os05g0387300	20.9244	17.2843	34.2397	6.90602	2.90977	6.50962	24.1494	5.4418	2.16044	0.000416594	0.00392326	-	5	18742852	18743489	-	638	protein_coding	-	-
Os11g0108650	78.942	134.207	125.219	62.1542	45.5865	57.6566	112.79	55.1324	1.0342	0.000420809	0.00396039	-	11	392252	394404	+	606	protein_coding	PF07732:Multicopper oxidase	-
Os01g0971800	45.6532	74.2207	86.0884	36.8321	22.3083	24.1786	68.6541	27.773	1.31455	0.000424163	0.00399066	-	1	42874273	42875515	-	1243	protein_coding	PF00249:Myb-like DNA-binding domain	Myb_DNA-binding
Os06g0246500	48.5065	65.0702	40.1094	12.661	21.3383	24.1786	51.2287	19.3927	1.3867	0.000424304	0.00399068	-	6	7602364	7605689	+	1568	protein_coding	PF00676:Dehydrogenase E1 component	-
Os09g0564400	2045.83	719.839	1311.87	2456.24	2885.53	3653.76	1359.18	2998.51	-1.14145	0.00042471	0.00399191	-	9	22438076	22439478	-	1110	protein_coding	PF00112:Papain family cysteine protease|PF08246:Cathepsin propeptide inhibitor domain (I29)	Peptidase_C1
Os01g0936000	16.1688	14.2341	9.78277	31.0771	41.7068	38.1278	13.3952	36.9705	-1.46758	0.00043037	0.00403987	-	1	41087786	41090680	+	646	protein_coding	PF00462:Glutaredoxin	-
Os08g0382400	48.5065	45.7525	38.1528	65.6072	94.0827	175.76	44.1373	111.817	-1.34513	0.000453036	0.00422799	-	8	18020081	18023911	+	1562	protein_coding	-	-
Os01g0674400	31.3866	29.4849	49.8921	65.6072	80.5037	94.8545	36.9212	80.3218	-1.12433	0.000453669	0.00423118	-	1	27714540	27715226	+	568	protein_coding	-	-
Os10g0161400	130.302	71.1705	90.9798	55.2482	31.0376	42.7775	97.484	43.0211	1.18773	0.000456986	0.004258	-	10	3908198	3912557	-	4184	protein_coding	PF00931:NB-ARC domain	NB-ARC
Os03g0758300	42.7999	67.1036	35.218	86.3252	106.692	108.804	48.3738	100.607	-1.06118	0.000457616	0.00426251	-	3	31344785	31350801	+	2324	protein_coding	PF00027:Cyclic nucleotide-binding domain	cNMP_binding
Os06g0207966	42.7999	31.5184	64.5663	17.265	16.4887	16.739	46.2948	16.8309	1.46166	0.000458017	0.00426487	-	6	5499342	5500323	-	792	protein_coding	-	-
Os06g0295900	36.1421	24.4013	20.5438	65.6072	64.015	53.9369	27.0291	61.1864	-1.17421	0.000462904	0.00430209	-	6	10926731	10928479	+	1749	protein_coding	-	-
Os01g0848200	41.8488	94.5551	30.3266	148.479	238.601	102.294	55.5768	163.125	-1.55542	0.000463932	0.00431025	-	1	36430978	36440843	+	3441	protein_coding	PF00171:Aldehyde dehydrogenase family|PF00696:Amino acid kinase family	Aldedh
Os09g0298100	60.8709	46.7692	45.0007	19.5671	4.84962	22.3187	50.8803	15.5785	1.71235	0.000471693	0.00437535	-	9	7240336	7244713	+	1972	protein_coding	PF00365:Phosphofructokinase	PFK
Os03g0385100	161.688	172.843	178.046	82.8722	118.331	53.9369	170.859	85.0466	1.00732	0.000472293	0.00437951	-	3	15300737	15301156	+	420	protein_coding	PF14368:Probable lipid transfer	-
Os12g0147200	6.65776	9.15049	0.978277	14.963	36.8571	35.3379	5.59551	29.0527	-2.38626	0.000473029	0.00438494	-	12	2312450	2313217	+	768	protein_coding	-	-
Os10g0144700	41.8488	83.3712	37.1745	4.60401	24.2481	12.0893	54.1315	13.6471	1.97153	0.000474376	0.00439461	-	10	2709163	2711992	-	1626	protein_coding	PF00067:Cytochrome P450	p450
Os02g0733400	13.3155	17.2843	17.609	36.8321	46.5564	38.1278	16.0696	40.5054	-1.33746	0.000474729	0.00439648	-	2	30577640	30578383	-	665	protein_coding	-	-
Os09g0107400	76.0887	58.9698	87.0666	33.3791	34.9173	39.9877	74.0417	36.0947	1.03422	0.0004796	0.0044345	-	9	693283	693606	-	324	protein_coding	-	-
Os07g0297500	2.85332	5.08361	1.95655	24.1711	13.5789	16.739	3.29783	18.163	-2.46185	0.000486422	0.00448614	-	7	11645020	11645718	-	699	protein_coding	PF00241:Cofilin/tropomyosin-type actin-binding protein	Cofilin_ADF
Os12g0573600	40.8977	24.4013	35.218	95.5333	83.4135	53.9369	33.5056	77.6279	-1.2054	0.00048776	0.00449704	-	12	23663142	23663722	+	581	protein_coding	-	-
novel.2079	5.70665	5.08361	7.82622	19.5671	21.3383	29.7583	6.20549	23.5546	-1.9282	0.000490354	0.00451952	-	7	29401913	29402997	-	650	-	-	-
Os06g0534500	21.8755	18.301	23.4786	5.75502	2.90977	6.50962	21.2184	5.05814	2.07264	0.000497879	0.00458451	-	6	19999929	20000815	+	887	protein_coding	PF13639:Ring finger domain	-
Os04g0590800	103.671	139.291	201.525	77.1172	79.5338	47.4272	148.162	68.0261	1.12598	0.000499374	0.00459681	-	4	29880299	29881660	+	701	protein_coding	-	-
Os05g0427900	112.231	181.993	243.591	70.2112	87.2932	96.7144	179.272	84.7396	1.07776	0.000501496	0.00461195	-	5	20978542	20979912	-	842	protein_coding	PF01556:DnaJ C terminal domain	DnaJ_C
Os11g0139400	118.889	149.458	172.177	64.4562	96.9925	43.7075	146.841	68.3854	1.10263	0.000505644	0.0046442	-	11	1818916	1820504	+	1589	protein_coding	PF03151:Triose-phosphate Transporter family	-
Os05g0508900	11.4133	26.4348	7.82622	31.0771	49.4662	92.9946	15.2248	57.8459	-1.93472	0.000519811	0.00476225	-	5	25193479	25194625	+	740	protein_coding	PF07123:Photosystem II reaction centre W protein (PsbW)	-
Os01g0210400	27.5821	24.4013	31.3049	8.05702	10.6692	7.43957	27.7628	8.72192	1.66923	0.000521112	0.00477115	-	1	6005040	6007163	-	1500	protein_coding	PF04765:Protein of unknown function (DUF616)	-
Os04g0611800	75.1376	80.321	103.697	26.4731	32.9774	54.8668	86.3853	38.1058	1.17066	0.000523598	0.0047895	-	4	31027347	31031039	+	2283	protein_coding	PF01397:Terpene synthase, N-terminal domain|PF03936:Terpene synthase family, metal binding domain	-
Os05g0191700	1.90222	11.1839	2.93483	54.0972	183.316	17.669	5.34033	85.0273	-3.99828	0.000532513	0.00486096	-	5	5638522	5641118	-	963	protein_coding	PF03767:HAD superfamily, subfamily IIIB (Acid phosphatase)	-
Os02g0635800	20.9244	21.3512	23.4786	4.60401	4.84962	7.43957	21.9181	5.63107	1.9477	0.000534846	0.00487841	-	2	25497325	25498429	+	1105	protein_coding	PF03634:TCP family transcription factor	TCP
Os10g0162842	1070.95	505.311	727.838	342.999	225.022	486.362	768.032	351.461	1.12765	0.00053836	0.00490429	-	10	4075770	4081525	+	1935	protein_coding	PF00069:Protein kinase domain	Pkinase
Os02g0744000	3.80443	11.1839	1.95655	16.114	29.0977	39.9877	5.64831	28.3998	-2.34594	0.000539349	0.0049106	-	2	31202228	31203685	+	930	protein_coding	-	-
Os12g0111900	41.8488	61.0033	58.6966	26.4731	25.218	14.8791	53.8496	22.1901	1.28702	0.000539392	0.0049106	-	12	617081	617614	-	402	protein_coding	PF06320:GCN5-like protein 1 (GCN5L1)	GCN5L1
Os06g0483200	20.9244	29.4849	27.3918	5.75502	5.81955	10.2294	25.9337	7.26799	1.81996	0.00054417	0.00494634	-	6	16400699	16432426	-	5702	protein_coding	-	-
Os02g0623600	58.9687	20.3344	42.0659	6.90602	7.7594	16.739	40.4563	10.4681	1.9377	0.000545111	0.00495178	-	2	24862203	24864799	-	2514	protein_coding	PF00069:Protein kinase domain	Pkinase
Os07g0158300	34.2399	49.8194	34.2397	57.5502	91.1729	162.741	39.433	103.821	-1.40222	0.000551559	0.00500721	-	7	3122638	3124603	-	1387	protein_coding	PF00076:RNA recognition motif. (a.k.a. RRM, RBD, or RNP domain)	RRM_1
Os11g0492900	32.3377	44.7357	57.7183	13.812	21.3383	14.8791	44.9306	16.6765	1.42397	0.000555601	0.00503603	-	11	17481271	17481813	-	543	protein_coding	PF00931:NB-ARC domain	NB-ARC
Os01g0913000	19.0222	22.3679	16.6307	40.2851	44.6165	51.147	19.3402	45.3496	-1.23437	0.000556398	0.00504167	-	1	39794547	39795809	+	947	protein_coding	PF00085:Thioredoxin	-
Os09g0425500	51.3598	38.6354	45.979	6.90602	13.5789	24.1786	45.3248	14.8879	1.58523	0.000557168	0.00504707	-	9	15430853	15431370	+	518	protein_coding	-	-
Os08g0429800	75.1376	87.438	46.9573	173.801	140.639	111.594	69.8443	142.011	-1.0218	0.000564966	0.00510221	-	8	20761382	20764018	-	2004	protein_coding	PF00067:Cytochrome P450	p450
Os03g0192100	3.80443	5.08361	7.82622	26.4731	13.5789	33.4781	5.57142	24.51	-2.13869	0.00056579	0.00510603	-	3	4789625	4793058	+	2211	protein_coding	PF00450:Serine carboxypeptidase	Peptidase_S10
Os01g0554150	7.60887	3.05016	7.82622	24.1711	17.4586	33.4781	6.16175	25.0359	-2.01815	0.000574634	0.00517457	-	1	20870047	20870923	+	699	protein_coding	PF03108:MuDR family transposase	MuDR
Os12g0516800	17.1199	27.4515	41.0876	9.20803	3.8797	8.36951	28.553	7.15241	2.00599	0.000581309	0.00523036	-	12	20080391	20083271	-	2404	protein_coding	PF14416:PMR5 N terminal Domain	-
novel.1619	8.55997	12.2007	13.6959	29.9261	31.0376	36.2679	11.4855	32.4105	-1.50152	0.000587143	0.00527083	-	5	4912286	4914643	-	849	-	-	-
Os10g0137100	107.475	197.244	122.285	49.4931	86.3233	61.3764	142.335	65.7309	1.10983	0.000589821	0.0052866	-	10	2312880	2313661	+	782	protein_coding	-	-
Os12g0137200	30.4355	37.6187	63.588	63.3052	116.391	185.059	43.8807	121.585	-1.4739	0.000593853	0.00531789	-	12	1802714	1807513	+	1665	protein_coding	PF03435:Saccharopine dehydrogenase NADP binding domain	Saccharop_dh
EPlOSAG00000048085	10.4622	10.1672	5.86966	21.8691	25.218	47.4272	8.83302	31.5048	-1.84152	0.000595829	0.00533229	-	11	19480157	19480257	-	101	ncRNA	-	-
Os11g0202300	14.2666	8.13377	7.82622	27.6241	30.0677	34.408	10.0755	30.6999	-1.6055	0.000596739	0.00533879	-	11	5168780	5172092	-	2077	protein_coding	PF00646:F-box domain	F-box
novel.806	28.5332	32.5351	24.4569	9.20803	9.69925	9.29946	28.5084	9.40224	1.59874	0.000598577	0.00535353	-	2	1868882	1869458	+	577	-	-	-
Os07g0197500	8.55997	20.3344	5.86966	58.7012	40.7368	26.9684	11.588	42.1355	-1.86321	0.000598756	0.00535353	-	7	5281095	5293886	-	2933	protein_coding	PF00931:NB-ARC domain	NB-ARC
Os07g0650100	18.0711	12.2007	11.7393	32.2281	40.7368	38.1278	14.0037	37.0309	-1.40296	0.0006081	0.00543037	-	7	27172211	27175529	+	2994	protein_coding	-	-
Os12g0616400	232.07	196.227	208.373	92.0803	155.188	70.6759	212.224	105.981	1.00128	0.000615595	0.00548638	-	12	26155007	26158687	+	1132	protein_coding	-	-
Os09g0109600	50.4087	21.3512	15.6524	105.892	73.7143	68.816	29.1374	82.8075	-1.50098	0.000626251	0.00556332	-	9	862654	863340	+	604	protein_coding	-	-
Os04g0481300	10.4622	6.10033	5.86966	18.4161	22.3083	53.9369	7.47739	31.5537	-2.08074	0.000633636	0.00562032	-	4	24073335	24074726	+	1012	protein_coding	PF08241:Methyltransferase domain	Methyltransf_11
Os12g0641200	4.75554	6.10033	7.82622	17.265	24.2481	27.8984	6.22736	23.1372	-1.90171	0.00064822	0.00573214	-	12	27512303	27513696	-	1394	protein_coding	PF13483:Beta-lactamase superfamily domain	-
Os02g0267900	20.9244	21.3512	10.761	32.2281	85.3534	46.4973	17.6789	54.6929	-1.63377	0.0006509	0.00575408	-	2	9574547	9575502	+	860	protein_coding	PF01357:Pollen allergen|PF03330:Lytic transglycolase	-
Os11g0591550	45.6532	42.7023	56.7401	19.5671	25.218	17.669	48.3652	20.818	1.21563	0.000652169	0.0057578	-	11	22491486	22492163	+	678	protein_coding	PF01965:DJ-1/PfpI family	DJ-1_PfpI
Os12g0411700	46.6043	62.02	82.1753	26.4731	31.0376	10.2294	63.5999	22.58	1.50097	0.000652314	0.0057578	-	12	12568930	12587004	-	2642	protein_coding	PF01061:ABC-2 type transporter	ABC2_membrane
Os02g0517333	11.4133	14.2341	14.6742	37.9831	26.188	49.2871	13.4405	37.8194	-1.49524	0.000656816	0.00579142	-	2	18714691	18717946	-	1774	protein_coding	-	-
Os05g0493166	61.822	71.1705	112.502	34.5301	39.7669	39.0577	81.8315	37.7849	1.11221	0.000669807	0.00588247	-	5	24237097	24237700	-	527	protein_coding	-	-
Os03g0579000	86.5509	77.2708	91.958	113.949	161.977	268.754	85.2599	181.56	-1.09341	0.000671925	0.00589858	-	3	21224305	21225936	-	1632	protein_coding	PF13180:PDZ domain|PF02163:Peptidase family M50	Peptidase_M50
Os08g0153900	56.1154	68.1203	76.3056	34.5301	31.0376	34.408	66.8471	33.3252	1.00459	0.000676695	0.00592944	-	8	3093804	3094878	-	1075	protein_coding	PF04654:Protein of unknown function, DUF599	-
Os11g0616100	77.0398	37.6187	45.0007	18.4161	5.81955	23.2486	53.2197	15.8281	1.75206	0.000676776	0.00592944	-	11	23968014	23975742	+	987	protein_coding	PF00069:Protein kinase domain	Pkinase
Os01g0725900	54.2132	30.5016	26.4135	107.043	196.895	49.2871	37.0428	117.742	-1.66681	0.000676873	0.00592944	-	1	30263383	30264381	-	895	protein_coding	PF01190:Pollen proteins Ole e I like	-
Os02g0627100	3098.71	3227.07	4942.26	1167.12	1484.95	2752.64	3756.01	1801.57	1.05963	0.000682366	0.00597395	-	2	25006495	25009018	-	2405	protein_coding	PF00221:Aromatic amino acid lyase	-
Os02g0218700	0.951108	4.06689	4.89138	16.114	20.3684	15.8091	3.30313	17.4305	-2.40942	0.000700726	0.00611621	-	2	6628383	6630103	+	1721	protein_coding	PF00067:Cytochrome P450	p450
Os12g0541500	95.1108	104.722	63.588	120.855	177.496	355.239	87.807	217.864	-1.31349	0.000701179	0.00611833	-	12	21660665	21666265	+	4128	protein_coding	-	-
Os11g0664000	167.395	76.2541	138.915	70.2112	44.6165	57.6566	127.521	57.4948	1.1541	0.000708654	0.00617426	-	11	26741921	26743907	+	1849	protein_coding	PF00069:Protein kinase domain	Pkinase
Os09g0482800	45.6532	43.719	50.8704	70.2112	81.4737	334.781	46.7475	162.155	-1.79652	0.000715544	0.00622493	-	9	18618052	18618753	+	702	protein_coding	PF13499:EF-hand domain pair	-
EPlOSAG00000015570	1.90222	3.05016	1.95655	21.8691	13.5789	10.2294	2.30298	15.2258	-2.72034	0.000723854	0.00628591	-	4	18721721	18721765	-	45	ncRNA	-	-
novel.2002	13.3155	29.4849	25.4352	6.90602	4.84962	4.64973	22.7452	5.46846	2.06744	0.000725715	0.00629766	-	7	5799524	5802678	-	2696	-	PF00295:Glycosyl hydrolases family 28	-
Os05g0542150	17.1199	13.2174	8.80449	46.0401	28.1278	37.1978	13.0473	37.1219	-1.50206	0.000730285	0.00632659	-	5	26911303	26914371	+	2876	protein_coding	-	-
EPlOSAG00000011892	1.90222	2.03344	3.91311	24.1711	16.4887	9.29946	2.61626	16.6531	-2.66011	0.000743153	0.00641888	-	9	13323361	13323428	-	68	ncRNA	-	-
Os01g0336300	29.4844	26.4348	45.0007	62.1542	76.624	71.6058	33.64	70.128	-1.0612	0.000772356	0.0066316	-	1	13170797	13171929	-	1128	protein_coding	PF04578:Protein of unknown function, DUF594	-
Os10g0113100	5.70665	13.2174	2.93483	20.7181	108.632	14.8791	7.28629	48.0762	-2.72846	0.000782128	0.00671153	-	10	869491	870947	+	1207	protein_coding	PF00248:Aldo/keto reductase family	Aldo_ket_red
Os02g0638300	17.1199	13.2174	13.6959	25.3221	45.5865	49.2871	14.6777	40.0652	-1.45474	0.000792273	0.00679255	-	2	25589927	25590697	-	771	protein_coding	PF02941:Ferredoxin thioredoxin reductase variable alpha chain	-
Os03g0626500	58.0176	62.02	87.0666	42.5871	25.218	17.669	69.0348	28.4914	1.29176	0.000794694	0.00680526	-	3	23850245	23851996	+	965	protein_coding	PF03372:Endonuclease/Exonuclease/phosphatase family	Exo_endo_phos
novel.86	30.4355	12.2007	28.37	54.0972	51.406	73.4657	23.6687	59.6563	-1.33154	0.000804958	0.00688501	-	1	21888443	21890428	+	1877	-	-	-
Os11g0300700	64.6754	122.007	105.654	52.9461	47.5263	39.9877	97.4453	46.82	1.05992	0.000814784	0.00695674	-	11	11223123	11224019	+	897	protein_coding	PF00069:Protein kinase domain	Pkinase
Os02g0694800	14.2666	13.2174	6.84794	29.9261	33.9474	33.4781	11.444	32.4505	-1.5053	0.000822101	0.00700477	-	2	28548351	28551798	-	1565	protein_coding	-	-
Os03g0643522	7.60887	7.11705	6.84794	17.265	24.2481	33.4781	7.19128	24.9971	-1.80502	0.000828152	0.00704805	-	3	24822798	24823019	+	222	protein_coding	-	-
Os07g0631900	63.7243	64.0535	49.8921	78.2682	124.15	211.098	59.2233	137.839	-1.22258	0.000830572	0.00706656	-	7	26211749	26213842	+	1053	protein_coding	PF00076:RNA recognition motif. (a.k.a. RRM, RBD, or RNP domain)	RRM_1
Os03g0110900	10.4622	15.2508	9.78277	23.0201	33.9474	51.147	11.8319	36.0381	-1.61742	0.000831303	0.00707071	-	3	636744	639366	+	1270	protein_coding	PF07876:Stress responsive A/B Barrel Domain	-
Os10g0178800	14.2666	22.3679	16.6307	67.9092	44.6165	31.6182	17.7551	48.048	-1.43137	0.000853739	0.00724878	-	10	5442144	5449074	-	3068	protein_coding	-	-
Os02g0811800	56.1154	53.8862	38.1528	23.0201	5.81955	20.4588	49.3848	16.4328	1.59705	0.000855054	0.00725782	-	2	34764348	34766529	+	1454	protein_coding	PF01370:NAD dependent epimerase/dehydratase family	Epimerase
Os02g0202950	37.0932	30.5016	54.7835	69.0602	90.203	91.1347	40.7928	83.466	-1.03488	0.00086231	0.00731491	-	2	5760034	5760495	-	462	protein_coding	PF00139:Legume lectin domain	-
Os01g0106300	153.128	472.775	394.246	140.422	109.601	177.62	340.05	142.548	1.25347	0.000863534	0.00732122	-	1	322591	323923	-	1253	protein_coding	PF05368:NmrA-like family	NmrA
Os06g0199100	21.8755	19.3177	27.3918	50.6441	39.7669	75.3256	22.8617	55.2456	-1.27486	0.000867259	0.00734636	-	6	5027686	5035358	-	4534	protein_coding	PF13812:Pentatricopeptide repeat domain|PF01535:PPR repeat|PF12854:PPR repeat|PF13041:PPR repeat family	PPR
Os03g0586500	33.2888	40.6689	29.3483	61.0032	61.1052	104.154	34.4353	75.4208	-1.13639	0.000870874	0.00737267	-	3	21634990	21637232	+	1127	protein_coding	-	-
Os11g0566800	27.5821	33.5518	33.2614	8.05702	6.78947	15.8091	31.4651	10.2185	1.60811	0.000873674	0.00739206	-	11	21102794	21104582	+	1423	protein_coding	PF00195:Chalcone and stilbene synthases, N-terminal domain|PF02797:Chalcone and stilbene synthases, C-terminal domain	Chal_sti_synt_N
Os01g0627933	49.4576	33.5518	41.0876	65.6072	79.5338	111.594	41.3657	85.5782	-1.05151	0.000881468	0.00744497	-	1	25070716	25072692	+	1731	protein_coding	PF00067:Cytochrome P450	p450
Os02g0815300	5.70665	11.1839	3.91311	13.812	32.0075	40.9176	6.93456	28.9124	-2.07369	0.000892413	0.00752644	-	2	34925371	34926093	+	723	protein_coding	-	-
Os01g0638000	17.1199	28.4682	27.3918	6.90602	7.7594	6.50962	24.3266	7.05835	1.78318	0.000904646	0.00762296	-	1	25598451	25600345	+	1895	protein_coding	PF00201:UDP-glucoronosyl and UDP-glucosyl transferase	UDPGT
Os07g0176600	36.1421	66.0869	30.3266	97.8353	92.1428	91.1347	44.1852	93.7043	-1.08704	0.000920842	0.00774592	-	7	4049784	4054523	+	2209	protein_coding	PF00069:Protein kinase domain	Pkinase
Os08g0302000	254.897	186.06	343.375	173.801	120.271	79.0454	261.444	124.373	1.07636	0.000922873	0.0077585	-	8	12455954	12457748	+	1505	protein_coding	PF00141:Peroxidase	-
Os06g0191800	54.2132	68.1203	60.6532	26.4731	20.3684	37.1978	60.9956	28.0131	1.11745	0.00093694	0.00786764	-	6	4633666	4635469	-	1722	protein_coding	PF00067:Cytochrome P450	p450
Os01g0132200	17.1199	15.2508	20.5438	5.75502	3.8797	1.85989	17.6382	3.83154	2.2354	0.000943997	0.00791772	-	1	1771497	1772410	-	914	protein_coding	-	-
Os08g0324300	40.8977	43.719	49.8921	23.0201	19.3985	17.669	44.8363	20.0292	1.1695	0.000945559	0.00792853	-	8	14209973	14213318	-	2096	protein_coding	PF02362:B3 DNA binding domain	B3
Os07g0622400	82.7464	69.1371	108.589	39.1341	34.9173	53.9369	86.8241	42.6628	1.02188	0.000963022	0.0080633	-	7	25742767	25743805	-	1039	protein_coding	PF00201:UDP-glucoronosyl and UDP-glucosyl transferase	UDPGT
Os01g0759200	22.8266	27.4515	37.1745	12.661	7.7594	8.36951	29.1509	9.59665	1.61723	0.000965309	0.00807307	-	1	31938559	31940184	-	1626	protein_coding	PF00069:Protein kinase domain|PF03822:NAF domain	Pkinase
Os10g0389300	82.7464	110.823	90.9798	21.8691	47.5263	56.7267	94.8496	42.0407	1.16155	0.000969216	0.00809412	-	10	12890904	12894595	-	3692	protein_coding	PF06405:Red chlorophyll catabolite reductase (RCC reductase)	-
Os01g0813800	98.9153	203.344	71.4142	258.976	292.917	265.965	124.558	272.619	-1.13157	0.000983942	0.00820291	-	1	34605594	34611055	-	2608	protein_coding	PF00232:Glycosyl hydrolase family 1	Glyco_hydro_1
Os02g0829850	27.5821	14.2341	15.6524	36.8321	42.6767	92.0646	19.1562	57.1911	-1.57995	0.00099526	0.00828298	-	2	35676813	35678078	-	1229	protein_coding	PF11267:Domain of unknown function (DUF3067)	-
Os01g0794400	11.4133	38.6354	38.1528	6.90602	8.72932	5.57968	29.4005	7.07167	2.05461	0.000995664	0.00828396	-	1	33642080	33650929	+	1413	protein_coding	PF13905:Thioredoxin-like	-
Os10g0477900	19.0222	32.5351	33.2614	10.359	3.8797	10.2294	28.2729	8.15604	1.80022	0.00102073	0.0084682	-	10	17873385	17876746	-	983	protein_coding	PF01073:3-beta hydroxysteroid dehydrogenase/isomerase family	-
novel.1043	45.6532	22.3679	44.0225	98.9863	59.1654	98.5743	37.3478	85.5753	-1.19208	0.00102934	0.00853475	-	2	32930713	32932320	-	1608	-	-	-
novel.1375	0.951108	4.06689	3.91311	13.812	12.609	23.2486	2.97703	16.5566	-2.4899	0.00103638	0.00858575	-	4	24691206	24692692	+	1487	-	PF03514:GRAS domain family	GRAS
novel.1837	30.4355	51.8528	61.6314	13.812	24.2481	15.8091	47.9732	17.9564	1.41036	0.00104379	0.0086323	-	6	14590406	14592298	-	1893	-	-	-
Os12g0257400	4.75554	6.10033	3.91311	17.265	15.5188	26.9684	4.92299	19.9174	-2.0238	0.0010467	0.00865145	-	12	8845834	8846234	+	346	protein_coding	-	-
novel.45	5.70665	13.2174	4.89138	35.6811	19.3985	29.7583	7.93847	28.2793	-1.83608	0.00104776	0.00865774	-	1	12126325	12127365	+	844	-	-	-
Os11g0467966	25.6799	32.5351	17.609	10.359	4.84962	6.50962	25.2747	7.23942	1.82204	0.00105277	0.00868389	-	11	16087020	16087847	-	828	protein_coding	-	-
Os07g0638300	0.951108	1.01672	0.978277	14.963	4.84962	16.739	0.982036	12.1839	-3.63154	0.00108531	0.00891436	-	7	26548836	26550044	+	998	protein_coding	PF00578:AhpC/TSA family|PF10417:C-terminal domain of 1-Cys peroxiredoxin	-
Os08g0553500	1.90222	7.11705	1.95655	17.265	18.4286	17.669	3.65861	17.7875	-2.29615	0.00108558	0.00891436	-	8	27690054	27690770	+	717	protein_coding	PF03087:Arabidopsis protein of unknown function	-
Os07g0640300	29.4844	14.2341	18.5873	5.75502	3.8797	5.57968	20.7686	5.07146	2.04161	0.00109001	0.00894723	-	7	26646515	26647959	-	622	protein_coding	-	-
Os04g0459900	52.311	38.6354	69.4577	84.0232	100.872	162.741	53.468	115.879	-1.11827	0.00109094	0.00895075	-	4	22954845	22960460	+	1697	protein_coding	PF13365:Trypsin-like peptidase domain|PF13180:PDZ domain	-
novel.1769	24.7288	16.2675	30.3266	49.4931	64.9849	47.4272	23.7743	53.9684	-1.18125	0.00109317	0.00896517	-	6	22549044	22552078	+	1544	-	-	-
Os01g0149200	58.0176	27.4515	21.5221	10.359	13.5789	6.50962	35.6637	10.1492	1.81836	0.00110797	0.00906739	-	1	2665085	2668967	-	3883	protein_coding	PF13966:zinc-binding in reverse transcriptase	-
Os12g0637800	39.9465	39.6521	64.5663	21.8691	17.4586	21.3888	48.055	20.2388	1.25009	0.001109	0.00907328	-	12	27330083	27331936	-	1854	protein_coding	PF06813:Nodulin-like	-
Os04g0302300	33.2888	19.3177	25.4352	58.7012	48.4962	61.3764	26.0139	56.1913	-1.10712	0.00111585	0.00912412	-	4	13521426	13525685	+	4260	protein_coding	PF01453:D-mannose binding lectin|PF08276:PAN-like domain	B_lectin
Os01g0666600	19.9733	8.13377	7.82622	35.6811	37.8271	32.5481	11.9778	35.3521	-1.55458	0.00115679	0.0094217	-	1	27246279	27247948	+	858	protein_coding	-	-
Os03g0685000	11.4133	16.2675	15.6524	26.4731	33.9474	69.7459	14.4444	43.3888	-1.59546	0.00116271	0.0094673	-	3	27309857	27312902	+	976	protein_coding	PF00111:2Fe-2S iron-sulfur cluster binding domain	Fer2
Os03g0659200	71.3331	53.8862	54.7835	74.8152	131.91	193.429	60.001	133.385	-1.15579	0.00116806	0.00950549	-	3	25800415	25801213	+	799	protein_coding	PF00111:2Fe-2S iron-sulfur cluster binding domain	Fer2
Os06g0253350	34.2399	39.6521	33.2614	16.114	11.6391	15.8091	35.7178	14.5207	1.30145	0.00119133	0.00966498	-	6	7954357	7958130	+	979	protein_coding	PF00069:Protein kinase domain	Pkinase
Os01g0827800	113.182	50.8361	94.8929	19.5671	41.7068	41.8476	86.3036	34.3738	1.32013	0.00119376	0.00968204	-	1	35420889	35421862	+	974	protein_coding	PF10604:Polyketide cyclase / dehydrase and lipid transport	-
Os08g0550200	6.65776	64.0535	24.4569	1.151	8.72932	0.929946	31.7227	3.60342	3.12172	0.00119732	0.00970814	-	8	27592835	27598698	-	1935	protein_coding	PF01554:MatE	MatE
Os02g0645000	35.191	68.1203	66.5228	25.3221	27.1579	17.669	56.6114	23.383	1.27816	0.00121961	0.00985578	-	2	25967753	25968734	-	982	protein_coding	PF13639:Ring finger domain	-
Os06g0116400	52.311	73.2039	46.9573	87.4762	101.842	210.168	57.4907	133.162	-1.21594	0.00123736	0.00997977	-	6	908856	910322	-	1279	protein_coding	-	-
Os07g0141100	19.9733	50.8361	21.5221	100.137	89.2331	53.0069	30.7771	80.7924	-1.39339	0.00126107	0.0101513	-	7	2128467	2130049	-	1452	protein_coding	PF00069:Protein kinase domain	Pkinase
novel.1227	21.8755	22.3679	28.37	3.45301	10.6692	6.50962	24.2045	6.87727	1.7946	0.00126223	0.0101577	-	3	16633056	16634915	-	1860	-	-	-
Os07g0591700	30.4355	24.4013	17.609	48.3421	45.5865	72.5358	24.1486	55.4881	-1.20248	0.00126274	0.0101591	-	7	24115634	24116647	+	798	protein_coding	-	-
Os03g0762300	54.2132	33.5518	54.7835	23.0201	20.3684	18.5989	47.5162	20.6625	1.20801	0.00129693	0.0103995	-	3	31526726	31528248	+	1252	protein_coding	PF00141:Peroxidase	-
Os06g0694200	0.951108	2.03344	2.93483	6.90602	11.6391	26.9684	1.97313	15.1712	-2.95763	0.00131281	0.0105094	-	6	28981367	28983436	-	1384	protein_coding	PF00657:GDSL-like Lipase/Acylhydrolase	Lipase_GDSL
Os07g0201800	38.9954	106.756	48.9138	26.4731	27.1579	13.9492	64.8883	22.5267	1.53015	0.00135458	0.0107931	-	7	5490710	5492857	+	1392	protein_coding	PF00201:UDP-glucoronosyl and UDP-glucosyl transferase	UDPGT
Os11g0142400	13.3155	25.418	21.5221	3.45301	7.7594	1.85989	20.0852	4.35743	2.19984	0.00137063	0.010912	-	11	1986490	1988373	+	1742	protein_coding	-	-
Os09g0555100	29.4844	85.4046	51.8487	27.6241	15.5188	8.36951	55.5792	17.1708	1.7092	0.00138538	0.0110112	-	9	22007439	22010349	+	1583	protein_coding	PF03547:Membrane transport protein	-
Os09g0387800	21.8755	6.10033	11.7393	46.0401	31.0376	41.8476	13.2384	39.6418	-1.57317	0.00138737	0.011021	-	9	13259206	13260189	-	900	protein_coding	-	-
novel.1919	11.4133	28.4682	9.78277	48.3421	35.8872	57.6566	16.5548	47.2953	-1.52057	0.00139208	0.0110493	-	7	5474290	5475800	+	1511	-	-	-
Os06g0125700	23.7777	21.3512	27.3918	54.0972	47.5263	48.3572	24.1735	49.9935	-1.04513	0.00140465	0.011137	-	6	1383405	1384884	-	1331	protein_coding	-	-
Os01g0883000	17.1199	28.4682	15.6524	3.45301	3.8797	7.43957	20.4135	4.92409	2.03041	0.00141156	0.0111825	-	1	38319060	38325583	+	2529	protein_coding	PF00069:Protein kinase domain	Pkinase
Os12g0609025	10.4622	10.1672	5.86966	27.6241	29.0977	22.3187	8.83302	26.3468	-1.57485	0.00141975	0.0112382	-	12	25722806	25723804	+	999	protein_coding	PF00069:Protein kinase domain	Pkinase
Os10g0527900	10.4622	13.2174	19.5655	39.1341	31.0376	39.0577	14.415	36.4098	-1.33649	0.00146572	0.0115579	-	10	20537710	20540484	-	2706	protein_coding	PF13855:Leucine rich repeat|PF08263:Leucine rich repeat N-terminal domain	LRRNT_2
Os04g0617900	85.5997	71.1705	64.5663	48.3421	13.5789	11.1594	73.7788	24.3601	1.61862	0.00149027	0.0117259	-	4	31393340	31395182	-	970	protein_coding	-	-
Os10g0502000	15.2177	46.7692	30.3266	49.4931	83.4135	119.033	30.7712	83.9799	-1.4554	0.0014933	0.0117434	-	10	19148232	19150913	-	1048	protein_coding	PF00805:Pentapeptide repeats (8 copies)	Pentapeptide
Os12g0150500	39.9465	40.6689	76.3056	25.3221	22.3083	11.1594	52.307	19.5966	1.42714	0.00151443	0.0118982	-	12	2506938	2507510	+	573	protein_coding	PF02298:Plastocyanin-like domain	Cu_bind_like
Os03g0425000	14.2666	30.5016	19.5655	28.7751	66.9248	91.1347	21.4446	62.2782	-1.54681	0.00152232	0.0119554	-	3	17738066	17741587	+	2968	protein_coding	PF08373:RAP domain	-
Os01g0846400	7.60887	13.2174	18.5873	49.4931	27.1579	35.3379	13.1378	37.3297	-1.50331	0.00155355	0.0121809	-	1	36346113	36349545	+	3419	protein_coding	-	-
Os05g0468800	18.0711	15.2508	15.6524	31.0771	36.8571	48.3572	16.3248	38.7638	-1.25222	0.00158605	0.0123955	-	5	23013524	23014346	-	729	protein_coding	PF01161:Phosphatidylethanolamine-binding protein	-
Os08g0425300	7.60887	10.1672	0.978277	23.0201	22.3083	29.7583	6.25145	25.0289	-2.00705	0.00161066	0.0125539	-	8	20429460	20431143	-	1684	protein_coding	PF00759:Glycosyl hydrolase family 9	-
Os11g0638700	15.2177	20.3344	29.3483	4.60401	8.72932	2.78984	21.6335	5.37439	2.00746	0.00161466	0.0125795	-	11	25237345	25239585	-	2241	protein_coding	PF13968:Domain of unknown function (DUF4220)|PF04578:Protein of unknown function, DUF594	-
Os08g0242800	50.4087	55.9197	45.0007	67.9092	94.0827	205.518	50.4431	122.503	-1.2841	0.00161601	0.0125821	-	8	8677955	8681460	+	2256	protein_coding	PF04542:Sigma-70 region 2|PF04545:Sigma-70, region 4|PF04539:Sigma-70 region 3	Sigma70_r2
EPlOSAG00000048336	14.2666	10.1672	5.86966	24.1711	42.6767	26.0385	10.1012	30.9621	-1.61679	0.00163511	0.0127172	-	4	28482835	28482874	+	40	ncRNA	-	-
Os06g0286146	47.5554	18.301	53.8052	14.963	14.5489	9.29946	39.8872	12.9371	1.6329	0.00166872	0.0129473	-	6	10279629	10280577	-	860	protein_coding	PF13962:Domain of unknown function	-
Os07g0421932	14.2666	11.1839	11.7393	19.5671	33.9474	62.3064	12.3966	38.6069	-1.6457	0.00169165	0.0131042	-	7	13596777	13598805	-	1193	protein_coding	-	-
Os11g0506800	91.3064	94.5551	75.3273	28.7751	35.8872	61.3764	87.0629	42.0129	1.04119	0.00169491	0.0131154	-	11	18070313	18071749	-	1437	protein_coding	PF02179:BAG domain	-
novel.1170	64.6754	26.4348	56.7401	12.661	26.188	11.1594	49.2834	16.6694	1.56138	0.00171133	0.0132143	-	3	35131479	35134119	+	1985	-	PF00067:Cytochrome P450	p450
Os12g0515300	65.6265	116.923	129.133	63.3052	39.7669	47.4272	103.894	50.1664	1.0548	0.00173552	0.0133742	-	12	19991426	19992367	-	942	protein_coding	PF00249:Myb-like DNA-binding domain	Myb_DNA-binding
Os07g0124400	23.7777	35.5853	28.37	50.6441	53.3458	82.7652	29.2443	62.2517	-1.09673	0.00174333	0.0134256	-	7	1269041	1269855	+	815	protein_coding	-	-
novel.1147	19.9733	11.1839	24.4569	43.7381	44.6165	41.8476	18.538	43.4007	-1.22334	0.00174501	0.0134314	-	3	26782650	26783188	+	539	-	-	-
Os08g0553700	12.3644	11.1839	4.89138	26.4731	39.7669	22.3187	9.47991	29.5196	-1.63921	0.00175465	0.0134877	-	8	27691880	27692897	+	1018	protein_coding	PF03087:Arabidopsis protein of unknown function	-
Os03g0168500	13.3155	8.13377	14.6742	31.0771	39.7669	26.0385	12.0411	32.2942	-1.41965	0.00176229	0.0135392	-	3	3694742	3696580	-	534	protein_coding	PF00085:Thioredoxin	-
Os01g0902700	35.191	24.4013	33.2614	12.661	7.7594	13.9492	30.9512	11.4565	1.43739	0.00177775	0.0136387	-	1	39307443	39310557	+	2034	protein_coding	PF00854:POT family	-
Os06g0652600	255.848	548.013	202.503	696.357	849.654	561.687	335.455	702.566	-1.06698	0.00177806	0.0136387	-	6	26714868	26717211	+	1885	protein_coding	-	-
Os02g0176900	10.4622	13.2174	12.7176	34.5301	24.2481	35.3379	12.1324	31.3721	-1.37069	0.00180836	0.0138454	-	2	4220950	4223647	-	999	protein_coding	PF01263:Aldose 1-epimerase	Aldose_epim
Os03g0155700	16.1688	56.9364	18.5873	86.3252	102.812	65.0962	30.5642	84.7445	-1.47503	0.00181207	0.0138666	-	3	3006419	3007309	-	666	protein_coding	PF03330:Lytic transglycolase|PF01357:Pollen allergen	-
Os10g0178500	1.90222	3.05016	2.93483	24.1711	7.7594	13.9492	2.62907	15.2932	-2.53371	0.00181315	0.0138675	-	10	5412580	5414295	+	1716	protein_coding	PF00201:UDP-glucoronosyl and UDP-glucosyl transferase	UDPGT
novel.871	27.5821	255.197	255.33	31.0771	22.3083	27.8984	179.37	27.0946	2.72745	0.00182149	0.0139129	-	2	18735753	18736384	+	632	-	-	-
Os04g0581800	10.4622	12.2007	18.5873	34.5301	37.8271	30.6882	13.75	34.3485	-1.32066	0.00184154	0.0140513	-	4	29408910	29409617	-	566	protein_coding	PF00403:Heavy-metal-associated domain	HMA
Os10g0536500	1.90222	3.05016	3.91311	9.20803	25.218	13.0192	2.95516	15.8151	-2.42976	0.00188426	0.0143394	-	10	20893685	20895216	+	774	protein_coding	PF14159:CAAD domains of cyanobacterial aminoacyl-tRNA synthetase	-
Os05g0314700	26.631	15.2508	19.5655	36.8321	40.7368	83.6951	20.4825	53.7547	-1.39474	0.00189204	0.0143911	-	5	14489395	14490822	-	1428	protein_coding	-	-
Os04g0438900	38.0443	40.6689	42.0659	17.265	20.3684	17.669	40.2597	18.4341	1.12448	0.00190158	0.0144561	-	4	21826905	21830399	-	1194	protein_coding	-	-
Os03g0711100	20.9244	27.4515	19.5655	40.2851	42.6767	75.3256	22.6471	52.7625	-1.22728	0.00191853	0.0145811	-	3	28686958	28689501	+	1840	protein_coding	PF06203:CCT motif	CCT
Os07g0165650	6.65776	4.06689	6.84794	21.8691	23.2782	15.8091	5.85753	20.3188	-1.78728	0.00194651	0.0147744	-	7	3533971	3534744	-	774	protein_coding	-	-
EPlOSAG00000020279	20.9244	18.301	22.5004	50.6441	53.3458	33.4781	20.5752	45.8227	-1.15059	0.00199099	0.0150923	-	2	4019348	4019413	-	66	ncRNA	-	-
novel.745	35.191	28.4682	12.7176	52.9461	58.1955	66.0262	25.4589	59.0559	-1.21486	0.00203547	0.0153805	-	12	6364101	6367871	-	1976	-	PF13976:GAG-pre-integrase domain|PF00098:Zinc knuckle|PF14223:gag-polypeptide of LTR copia-type	zf-CCHC
Os09g0546100	18.0711	18.301	11.7393	2.30201	3.8797	4.64973	16.0371	3.61048	2.12939	0.00204176	0.0154166	-	9	21586113	21586782	+	670	protein_coding	PF02519:Auxin responsive protein	Auxin_inducible
Os03g0739700	76.0887	175.893	137.937	46.0401	44.6165	82.7652	129.973	57.8073	1.1638	0.00206571	0.015561	-	3	30349191	30350948	+	1297	protein_coding	PF03350:Uncharacterized protein family, UPF0114	-
novel.373	46.6043	24.4013	45.0007	14.963	14.5489	16.739	38.6688	15.417	1.32703	0.00206822	0.0155759	-	10	23136288	23138479	+	1772	-	PF10536:Plant mobile domain	-
Os12g0624300	13.3155	31.5184	26.4135	8.05702	4.84962	7.43957	23.7491	6.78207	1.81221	0.00208075	0.015658	-	12	26669216	26670920	-	1705	protein_coding	PF01699:Sodium/calcium exchanger protein	Na_Ca_ex
Os01g0801500	48.5065	28.4682	50.8704	13.812	23.2782	13.9492	42.615	17.0131	1.32161	0.00208391	0.0156736	-	1	33949387	33951631	-	1288	protein_coding	PF00332:Glycosyl hydrolases family 17	Glyco_hydro_17
Os04g0481800	25.6799	16.2675	27.3918	5.75502	3.8797	10.2294	23.1131	6.62137	1.79408	0.0020884	0.0157034	-	4	24098311	24099631	-	1321	protein_coding	PF13813:Membrane bound O-acyl transferase family	-
Os07g0170000	55.1643	66.0869	49.8921	18.4161	35.8872	26.0385	57.0478	26.7806	1.08063	0.00208894	0.0157034	-	7	3711848	3712695	+	848	protein_coding	PF13561:Enoyl-(Acyl carrier protein) reductase	-
Os03g0727600	85.5997	77.2708	184.894	194.52	203.684	406.386	115.922	268.197	-1.21109	0.00210421	0.0158018	-	3	29660662	29662922	-	1970	protein_coding	PF00155:Aminotransferase class I and II	Aminotran_1_2
Os11g0524601	67.5287	36.602	79.2404	34.5301	23.2782	20.4588	61.1237	26.089	1.23919	0.00211232	0.0158503	-	11	18994678	19000728	-	1353	protein_coding	PF01419:Jacalin-like lectin domain	-
Os06g0484500	5.70665	4.06689	3.91311	8.05702	20.3684	34.408	4.56221	20.9445	-2.2069	0.00215043	0.0160975	-	6	16504514	16505330	+	817	protein_coding	-	-
Os12g0222300	3.80443	1.01672	1.95655	6.90602	12.609	25.1085	2.25924	14.8745	-2.71806	0.0021564	0.0161352	-	12	6625464	6626040	+	577	protein_coding	-	-
Os01g0635200	31.3866	26.4348	29.3483	12.661	10.6692	11.1594	29.0565	11.4965	1.34326	0.00216424	0.0161855	-	1	25462003	25463635	+	512	protein_coding	-	-
Os08g0238500	11.4133	11.1839	11.7393	1.151	0.969925	2.78984	11.4455	1.63692	2.77864	0.00217305	0.016243	-	8	8406018	8410016	+	835	protein_coding	PF01738:Dienelactone hydrolase family	-
Os01g0912700	5.70665	3.05016	12.7176	13.812	33.9474	36.2679	7.15814	28.0091	-1.97218	0.00218773	0.0163316	-	1	39777762	39779892	+	1048	protein_coding	PF10184:Uncharacterized conserved protein (DUF2358)	-
Os01g0152000	21.8755	27.4515	16.6307	1.151	8.72932	6.50962	21.9859	5.46331	1.9743	0.00218899	0.0163368	-	1	2810313	2815017	+	4485	protein_coding	PF13855:Leucine rich repeat|PF08263:Leucine rich repeat N-terminal domain|PF00069:Protein kinase domain	LRRNT_2
Os04g0330200	76.0887	56.9364	54.7835	19.5671	15.5188	41.8476	62.6029	25.6445	1.27902	0.00219668	0.0163816	-	4	15342893	15344478	-	607	protein_coding	PF01419:Jacalin-like lectin domain	-
Os06g0285200	21.8755	25.418	37.1745	87.4762	49.4662	52.077	28.156	63.0065	-1.15615	0.00219987	0.0163921	-	6	10137823	10138746	+	924	protein_coding	PF00808:Histone-like transcription factor (CBF/NF-Y) and archaeal histone	-
Os01g0315700	39.9465	62.02	85.1101	20.7181	21.3383	36.2679	62.3589	26.1081	1.24809	0.00220029	0.0163921	-	1	11906167	11906868	+	626	protein_coding	-	-
Os02g0731600	19.9733	20.3344	12.7176	26.4731	41.7068	84.6251	17.6751	50.935	-1.53373	0.00220036	0.0163921	-	2	30472233	30473053	+	523	protein_coding	PF14159:CAAD domains of cyanobacterial aminoacyl-tRNA synthetase	-
Os12g0188700	9.51108	10.1672	5.86966	23.0201	19.3985	35.3379	8.51599	25.9188	-1.6107	0.00224848	0.0166991	-	12	4461716	4462756	-	956	protein_coding	PF00085:Thioredoxin	-
Os06g0626766	19.9733	22.3679	19.5655	8.05702	4.84962	6.50962	20.6356	6.47209	1.68373	0.00225399	0.0167229	-	6	25298782	25299517	+	736	protein_coding	-	-
Os07g0143000	3.80443	13.2174	6.84794	17.265	23.2782	50.2171	7.95658	30.2534	-1.94069	0.00225904	0.0167561	-	7	2197573	2201392	+	1540	protein_coding	PF00248:Aldo/keto reductase family	Aldo_ket_red
novel.1059	15.2177	20.3344	24.4569	6.90602	3.8797	6.50962	20.003	5.76511	1.80149	0.00227498	0.0168657	-	3	3520186	3521416	+	1113	-	-	-
Os06g0235500	8.55997	5.08361	3.91311	21.8691	28.1278	13.9492	5.85223	21.3154	-1.85834	0.00228414	0.0169076	-	6	7057088	7060563	-	3350	protein_coding	-	-
Os05g0552100	52.311	51.8528	43.0442	21.8691	25.218	26.0385	49.0693	24.3752	1.00478	0.00231564	0.0171015	-	5	27449467	27454969	-	2910	protein_coding	-	-
Os01g0315600	33.2888	83.3712	68.4794	34.5301	18.4286	20.4588	61.7131	24.4725	1.3431	0.00236047	0.0173839	-	1	11897584	11902407	+	1508	protein_coding	PF12146:Serine aminopeptidase, S33	-
novel.2411	5.70665	15.2508	10.761	24.1711	32.9774	31.6182	10.5728	29.5889	-1.49525	0.00237625	0.0174823	-	9	17352732	17355693	-	1811	-	-	-
Os08g0498400	279.626	787.959	681.859	191.067	320.075	313.392	583.148	274.844	1.08385	0.00239593	0.0176137	-	8	24593142	24597525	-	1583	protein_coding	PF01596:O-methyltransferase	-
Os05g0551500	22.8266	13.2174	14.6742	39.1341	30.0677	56.7267	16.906	41.9762	-1.31125	0.00247191	0.0180806	-	5	27412286	27414368	-	1871	protein_coding	PF07797:Protein of unknown function (DUF1639)	-
Os11g0290600	35.191	46.7692	43.0442	17.265	20.3684	20.4588	41.6681	19.3641	1.09952	0.00252892	0.0184556	-	11	10538027	10539355	-	1199	protein_coding	-	-
[truncated: 207 more rows]
